# Supplementary material for: Construction of an enzyme-constrained metabolic network model for Myceliophthora thermophila using machine learning-based kcat data
Source: Research Square preprint supplement (doi:10.21203/rs.3.rs-3927159/v1), 2024-02-07
Supplement: Supplementary file 1 [file 6ec4395634e841c365171f34.xlsx]

## Sheet: D-glucose
Table10 Reaction fluxes and enzyme amounts for precursors synthesis of 12 biomass precursors from five carbon sources.
3pg_c								accoa_m						akg_m							e4p_c							f6p_c							g3p_c							g6p_c							oaa_m
3pg_c	fluxes	equ	ec-code	kcat_MW	E		accoa_m	fluxes	equ	ec-code	kcat_MW	E		akg_m	fluxes	equ	ec-code	kcat_MW	E		e4p_c	fluxes	equ	ec-code	kcat_MW	E		f6p_c	fluxes	equ	ec-code	kcat_MW	E		g3p_c	fluxes	equ	ec-code	kcat_MW	E		g6p_c	fluxes	equ	ec-code	kcat_MW	E		ooa_m
R1	2.5	glc__D_e --> 0.67 BDGLC_e + 0.33 glc__aD_e					R1	2.5	glc__D_e --> 0.67 BDGLC_e + 0.33 glc__aD_e					R1	2.5	glc__D_e --> 0.67 BDGLC_e + 0.33 glc__aD_e					R1	2.5	glc__D_e --> 0.67 BDGLC_e + 0.33 glc__aD_e					R1	2.5	glc__D_e --> 0.67 BDGLC_e + 0.33 glc__aD_e					R1	2.5	glc__D_e --> 0.67 BDGLC_e + 0.33 glc__aD_e					R1	2.5	glc__D_e --> 0.67 BDGLC_e + 0.33 glc__aD_e					R1
R2	0	glc__D_c --> 0.67 BDGLC_c + 0.33 Glc_aD_c					R2	0	glc__D_c --> 0.67 BDGLC_c + 0.33 Glc_aD_c					R2	0	glc__D_c --> 0.67 BDGLC_c + 0.33 Glc_aD_c					R2	0	glc__D_c --> 0.67 BDGLC_c + 0.33 Glc_aD_c					R2	0	glc__D_c --> 0.67 BDGLC_c + 0.33 Glc_aD_c					R2	0	glc__D_c --> 0.67 BDGLC_c + 0.33 Glc_aD_c					R2	0	glc__D_c --> 0.67 BDGLC_c + 0.33 Glc_aD_c					R2
R3	0.825	Glc_aD_c --> BDGLC_c	5.1.3.3	58336	1.41422e-05		R3	0.825	Glc_aD_c --> BDGLC_c	5.1.3.3	58336	1.41422e-05		R3	0.825	Glc_aD_c --> BDGLC_c	5.1.3.3	58336	1.41422e-05		R3	0.825	Glc_aD_c --> BDGLC_c	5.1.3.3	58336	1.41422e-05		R3	0.825	Glc_aD_c --> BDGLC_c	5.1.3.3	58336	1.41422e-05		R3	0.825	Glc_aD_c --> BDGLC_c	5.1.3.3	58336	1.41422e-05		R3	0.825	Glc_aD_c --> BDGLC_c	5.1.3.3	58336	1.41422e-05		R3
R4	0	arab__L_c --> BLARAB_c	5.1.3.3	58336	0		R4	0	arab__L_c --> BLARAB_c	5.1.3.3	58336	0		R4	0	arab__L_c --> BLARAB_c	5.1.3.3	58336	0		R4	0	arab__L_c --> BLARAB_c	5.1.3.3	58336	0		R4	0	arab__L_c --> BLARAB_c	5.1.3.3	58336	0		R4	0	arab__L_c --> BLARAB_c	5.1.3.3	58336	0		R4	0	arab__L_c --> BLARAB_c	5.1.3.3	58336	0		R4
R5	0	fru_B_c --> fru_c	5.1.3.3	42045.9	0		R5	0	fru_B_c --> fru_c	5.1.3.3	42045.9	0		R5	0	fru_B_c --> fru_c	5.1.3.3	42045.9	0		R5	0	fru_B_c --> fru_c	5.1.3.3	42045.9	0		R5	0	fru_B_c --> fru_c	5.1.3.3	42045.9	0		R5	-4.70303e-17	fru_B_c --> fru_c	5.1.3.3	42045.9	-1.11855e-21		R5	0	fru_B_c --> fru_c	5.1.3.3	42045.9	0		R5
R6_num1	2.5	BDGLC_c + atp_c --> adp_c + g6p_B_c + h_c	2.7.1.1,2.7.1.2	101063	2.47371e-05		R6_num1	2.5	BDGLC_c + atp_c --> adp_c + g6p_B_c + h_c	2.7.1.1,2.7.1.2	101063	2.47371e-05		R6_num1	2.5	BDGLC_c + atp_c --> adp_c + g6p_B_c + h_c	2.7.1.1,2.7.1.2	101063	2.47371e-05		R6_num1	2.5	BDGLC_c + atp_c --> adp_c + g6p_B_c + h_c	2.7.1.1,2.7.1.2	101063	2.47371e-05		R6_num1	2.5	BDGLC_c + atp_c --> adp_c + g6p_B_c + h_c	2.7.1.1,2.7.1.2	101063	2.47371e-05		R6_num1	2.5	BDGLC_c + atp_c --> adp_c + g6p_B_c + h_c	2.7.1.1,2.7.1.2	101063	2.47371e-05		R6_num1	2.5	BDGLC_c + atp_c --> adp_c + g6p_B_c + h_c	2.7.1.1,2.7.1.2	101063	2.47371e-05		R6_num1
R7	2.5	g6p_B_c --> f6p_c	5.3.1.9	196076	1.27502e-05		R7	1.29875	g6p_B_c --> f6p_c	5.3.1.9	196076	6.6237e-06		R7	2.5	g6p_B_c --> f6p_c	5.3.1.9	196076	1.27502e-05		R7	2.5	g6p_B_c --> f6p_c	5.3.1.9	196076	1.27502e-05		R7	2.5	g6p_B_c --> f6p_c	5.3.1.9	196076	1.27502e-05		R7	2.5	g6p_B_c --> f6p_c	5.3.1.9	196076	1.27502e-05		R7	0.151774	g6p_B_c --> f6p_c	5.3.1.9	196076	7.74058e-07		R7
R8	0	cit_m --> ac_m + oaa_m	4.1.3.6				R8	0	cit_m --> ac_m + oaa_m	4.1.3.6				R8	0	cit_m --> ac_m + oaa_m	4.1.3.6				R8	0	cit_m --> ac_m + oaa_m	4.1.3.6				R8	0	cit_m --> ac_m + oaa_m	4.1.3.6				R8	0	cit_m --> ac_m + oaa_m	4.1.3.6				R8	0	cit_m --> ac_m + oaa_m	4.1.3.6				R8
R9	-1.24293e-16	h_c + pyr_c --> acald_c + co2_c	4.1.1.1	1200.44	-1.03539e-19		R9	0	h_c + pyr_c --> acald_c + co2_c	4.1.1.1	1200.44	0		R9	0	h_c + pyr_c --> acald_c + co2_c	4.1.1.1	1200.44	0		R9	0	h_c + pyr_c --> acald_c + co2_c	4.1.1.1	1200.44	0		R9	2.88715e-31	h_c + pyr_c --> acald_c + co2_c	4.1.1.1	1200.44	2.40507e-34		R9	0	h_c + pyr_c --> acald_c + co2_c	4.1.1.1	1200.44	0		R9	0	h_c + pyr_c --> acald_c + co2_c	4.1.1.1	1200.44	0		R9
R10_num1	0	etoh_c + nad_c --> acald_c + h_c + nadh_c	1.1.1.1,1.1.1.71	2066.78	0		R10_num1	0	etoh_c + nad_c --> acald_c + h_c + nadh_c	1.1.1.1,1.1.1.71	2066.78	0		R10_num1	0	etoh_c + nad_c --> acald_c + h_c + nadh_c	1.1.1.1,1.1.1.71	2066.78	0		R10_num1	0	etoh_c + nad_c --> acald_c + h_c + nadh_c	1.1.1.1,1.1.1.71	2066.78	0		R10_num1	0	etoh_c + nad_c --> acald_c + h_c + nadh_c	1.1.1.1,1.1.1.71	2066.78	0		R10_num1	0	etoh_c + nad_c --> acald_c + h_c + nadh_c	1.1.1.1,1.1.1.71	2066.78	0		R10_num1	0	etoh_c + nad_c --> acald_c + h_c + nadh_c	1.1.1.1,1.1.1.71	2066.78	0		R10_num1
R11_num1	0	etoh_c + nadp_c --> acald_c + h_c + nadph_c	1.1.1.2,1.1.1.71	406.941	0		R11_num1	0	etoh_c + nadp_c --> acald_c + h_c + nadph_c	1.1.1.2,1.1.1.71	406.941	0		R11_num1	0	etoh_c + nadp_c --> acald_c + h_c + nadph_c	1.1.1.2,1.1.1.71	406.941	0		R11_num1	0	etoh_c + nadp_c --> acald_c + h_c + nadph_c	1.1.1.2,1.1.1.71	406.941	0		R11_num1	0	etoh_c + nadp_c --> acald_c + h_c + nadph_c	1.1.1.2,1.1.1.71	406.941	0		R11_num1	0	etoh_c + nadp_c --> acald_c + h_c + nadph_c	1.1.1.2,1.1.1.71	406.941	0		R11_num1	0	etoh_c + nadp_c --> acald_c + h_c + nadph_c	1.1.1.2,1.1.1.71	406.941	0		R11_num1
R12_num1	0	etoh_m + nad_m --> acald_m + h_m + nadh_m	1.1.1.1,1.1.1.71	5438.52	0		R12_num1	0	etoh_m + nad_m --> acald_m + h_m + nadh_m	1.1.1.1,1.1.1.71	5438.52	0		R12_num1	0	etoh_m + nad_m --> acald_m + h_m + nadh_m	1.1.1.1,1.1.1.71	5438.52	0		R12_num1	0	etoh_m + nad_m --> acald_m + h_m + nadh_m	1.1.1.1,1.1.1.71	5438.52	0		R12_num1	0	etoh_m + nad_m --> acald_m + h_m + nadh_m	1.1.1.1,1.1.1.71	5438.52	0		R12_num1	0	etoh_m + nad_m --> acald_m + h_m + nadh_m	1.1.1.1,1.1.1.71	5438.52	0		R12_num1	0	etoh_m + nad_m --> acald_m + h_m + nadh_m	1.1.1.1,1.1.1.71	5438.52	0		R12_num1
R13	0	h_m + nadh_m + q_m --> nad_m + qh2_m	1.6.5.9	798.645	0		R13	0	h_m + nadh_m + q_m --> nad_m + qh2_m	1.6.5.9	798.645	0		R13	0	h_m + nadh_m + q_m --> nad_m + qh2_m	1.6.5.9	798.645	0		R13	0	h_m + nadh_m + q_m --> nad_m + qh2_m	1.6.5.9	798.645	0		R13	0	h_m + nadh_m + q_m --> nad_m + qh2_m	1.6.5.9	798.645	0		R13	0	h_m + nadh_m + q_m --> nad_m + qh2_m	1.6.5.9	798.645	0		R13	0	h_m + nadh_m + q_m --> nad_m + qh2_m	1.6.5.9	798.645	0		R13
R14	0	h_c + nadh_c + q_m --> nad_c + qh2_m	1.6.5.9	798.645	0		R14	0	h_c + nadh_c + q_m --> nad_c + qh2_m	1.6.5.9	798.645	0		R14	0	h_c + nadh_c + q_m --> nad_c + qh2_m	1.6.5.9	798.645	0		R14	0	h_c + nadh_c + q_m --> nad_c + qh2_m	1.6.5.9	798.645	0		R14	0	h_c + nadh_c + q_m --> nad_c + qh2_m	1.6.5.9	798.645	0		R14	0	h_c + nadh_c + q_m --> nad_c + qh2_m	1.6.5.9	798.645	0		R14	0	h_c + nadh_c + q_m --> nad_c + qh2_m	1.6.5.9	798.645	0		R14
R15_num1	0	2.0 ficytC_m + nadph_c --> 2.0 FERO_m + h_c + nadp_c	1.6.2.4	393.409	0		R15_num1	0	2.0 ficytC_m + nadph_c --> 2.0 FERO_m + h_c + nadp_c	1.6.2.4	393.409	0		R15_num1	0	2.0 ficytC_m + nadph_c --> 2.0 FERO_m + h_c + nadp_c	1.6.2.4	393.409	0		R15_num1	0	2.0 ficytC_m + nadph_c --> 2.0 FERO_m + h_c + nadp_c	1.6.2.4	393.409	0		R15_num1	0	2.0 ficytC_m + nadph_c --> 2.0 FERO_m + h_c + nadp_c	1.6.2.4	393.409	0		R15_num1	0	2.0 ficytC_m + nadph_c --> 2.0 FERO_m + h_c + nadp_c	1.6.2.4	393.409	0		R15_num1	0	2.0 ficytC_m + nadph_c --> 2.0 FERO_m + h_c + nadp_c	1.6.2.4	393.409	0		R15_num1
R16	0	h_c + nadph_c + q_m --> nadp_c + qh2_m	1.6.99.1	211.559	0		R16	0	h_c + nadph_c + q_m --> nadp_c + qh2_m	1.6.99.1	211.559	0		R16	0	h_c + nadph_c + q_m --> nadp_c + qh2_m	1.6.99.1	211.559	0		R16	0	h_c + nadph_c + q_m --> nadp_c + qh2_m	1.6.99.1	211.559	0		R16	0	h_c + nadph_c + q_m --> nadp_c + qh2_m	1.6.99.1	211.559	0		R16	0	h_c + nadph_c + q_m --> nadp_c + qh2_m	1.6.99.1	211.559	0		R16	0	h_c + nadph_c + q_m --> nadp_c + qh2_m	1.6.99.1	211.559	0		R16
R17	-1.06577e-14	fadh2_m + q_m --> fad_m + h_m + qh2_m	1.5.5.1	525.866	-2.0267e-17		R17	0	fadh2_m + q_m --> fad_m + h_m + qh2_m	1.5.5.1	525.866	0		R17	0.5	fadh2_m + q_m --> fad_m + h_m + qh2_m	1.5.5.1	525.866	0.000950813		R17	0	fadh2_m + q_m --> fad_m + h_m + qh2_m	1.5.5.1	525.866	0		R17	0	fadh2_m + q_m --> fad_m + h_m + qh2_m	1.5.5.1	525.866	0		R17	0	fadh2_m + q_m --> fad_m + h_m + qh2_m	1.5.5.1	525.866	0		R17	0	fadh2_m + q_m --> fad_m + h_m + qh2_m	1.5.5.1	525.866	0		R17
R18_num1	0	2.0 h_c + 2.0 o2s_c --> h2o2_c + o2_c	1.15.1.1	3685.59	0		R18_num1	0	2.0 h_c + 2.0 o2s_c --> h2o2_c + o2_c	1.15.1.1	3685.59	0		R18_num1	0	2.0 h_c + 2.0 o2s_c --> h2o2_c + o2_c	1.15.1.1	3685.59	0		R18_num1	0	2.0 h_c + 2.0 o2s_c --> h2o2_c + o2_c	1.15.1.1	3685.59	0		R18_num1	0	2.0 h_c + 2.0 o2s_c --> h2o2_c + o2_c	1.15.1.1	3685.59	0		R18_num1	0	2.0 h_c + 2.0 o2s_c --> h2o2_c + o2_c	1.15.1.1	3685.59	0		R18_num1	0	2.0 h_c + 2.0 o2s_c --> h2o2_c + o2_c	1.15.1.1	3685.59	0		R18_num1
R19_num1	0	2.0 h_m + 2.0 o2s_m --> h2o2_m + o2_m	1.15.1.1	3685.59	0		R19_num1	0	2.0 h_m + 2.0 o2s_m --> h2o2_m + o2_m	1.15.1.1	3685.59	0		R19_num1	0	2.0 h_m + 2.0 o2s_m --> h2o2_m + o2_m	1.15.1.1	3685.59	0		R19_num1	0	2.0 h_m + 2.0 o2s_m --> h2o2_m + o2_m	1.15.1.1	3685.59	0		R19_num1	0	2.0 h_m + 2.0 o2s_m --> h2o2_m + o2_m	1.15.1.1	3685.59	0		R19_num1	0	2.0 h_m + 2.0 o2s_m --> h2o2_m + o2_m	1.15.1.1	3685.59	0		R19_num1	0	2.0 h_m + 2.0 o2s_m --> h2o2_m + o2_m	1.15.1.1	3685.59	0		R19_num1
R20_num1	0	h_c + nadph_c + nh4_c + pyr_c --> ala__L_c + h2o_c + nadp_c	1.4.1.1,1.4.1.2,1.4.1.3,1.4.1.4	2445.3	0		R20_num1	0	h_c + nadph_c + nh4_c + pyr_c --> ala__L_c + h2o_c + nadp_c	1.4.1.1,1.4.1.2,1.4.1.3,1.4.1.4	2445.3	0		R20_num1	0	h_c + nadph_c + nh4_c + pyr_c --> ala__L_c + h2o_c + nadp_c	1.4.1.1,1.4.1.2,1.4.1.3,1.4.1.4	2445.3	0		R20_num1	0	h_c + nadph_c + nh4_c + pyr_c --> ala__L_c + h2o_c + nadp_c	1.4.1.1,1.4.1.2,1.4.1.3,1.4.1.4	2445.3	0		R20_num1	0	h_c + nadph_c + nh4_c + pyr_c --> ala__L_c + h2o_c + nadp_c	1.4.1.1,1.4.1.2,1.4.1.3,1.4.1.4	2445.3	0		R20_num1	0	h_c + nadph_c + nh4_c + pyr_c --> ala__L_c + h2o_c + nadp_c	1.4.1.1,1.4.1.2,1.4.1.3,1.4.1.4	2445.3	0		R20_num1	0	h_c + nadph_c + nh4_c + pyr_c --> ala__L_c + h2o_c + nadp_c	1.4.1.1,1.4.1.2,1.4.1.3,1.4.1.4	2445.3	0		R20_num1
R21_num1	-8.36889e-16	h_c + nadh_c + nh4_c + pyr_c --> ala__L_c + h2o_c + nad_c	1.4.1.1,1.4.1.2,1.4.1.3,1.4.1.4	2595.3	-3.22463e-19		R21_num1	0.870481	h_c + nadh_c + nh4_c + pyr_c --> ala__L_c + h2o_c + nad_c	1.4.1.1,1.4.1.2,1.4.1.3,1.4.1.4	2595.3	0.000335406		R21_num1	0	h_c + nadh_c + nh4_c + pyr_c --> ala__L_c + h2o_c + nad_c	1.4.1.1,1.4.1.2,1.4.1.3,1.4.1.4	2595.3	0		R21_num1	-9.5224e-15	h_c + nadh_c + nh4_c + pyr_c --> ala__L_c + h2o_c + nad_c	1.4.1.1,1.4.1.2,1.4.1.3,1.4.1.4	2595.3	-3.66909e-18		R21_num1	0	h_c + nadh_c + nh4_c + pyr_c --> ala__L_c + h2o_c + nad_c	1.4.1.1,1.4.1.2,1.4.1.3,1.4.1.4	2595.3	0		R21_num1	0	h_c + nadh_c + nh4_c + pyr_c --> ala__L_c + h2o_c + nad_c	1.4.1.1,1.4.1.2,1.4.1.3,1.4.1.4	2595.3	0		R21_num1	0	h_c + nadh_c + nh4_c + pyr_c --> ala__L_c + h2o_c + nad_c	1.4.1.1,1.4.1.2,1.4.1.3,1.4.1.4	2595.3	0		R21_num1
R22_num1	0	BCCP_c + atp_c + co2_c + h2o_c --> adp_c + carP_c + 2.0 h_c + pi_c	6.3.4.14	556.812	0		R22_num1	0	BCCP_c + atp_c + co2_c + h2o_c --> adp_c + carP_c + 2.0 h_c + pi_c	6.3.4.14	556.812	0		R22_num1	1.63538e-16	BCCP_c + atp_c + co2_c + h2o_c --> adp_c + carP_c + 2.0 h_c + pi_c	6.3.4.14	556.812	2.93704e-19		R22_num1	0	BCCP_c + atp_c + co2_c + h2o_c --> adp_c + carP_c + 2.0 h_c + pi_c	6.3.4.14	556.812	0		R22_num1	0	BCCP_c + atp_c + co2_c + h2o_c --> adp_c + carP_c + 2.0 h_c + pi_c	6.3.4.14	556.812	0		R22_num1	0	BCCP_c + atp_c + co2_c + h2o_c --> adp_c + carP_c + 2.0 h_c + pi_c	6.3.4.14	556.812	0		R22_num1	0	BCCP_c + atp_c + co2_c + h2o_c --> adp_c + carP_c + 2.0 h_c + pi_c	6.3.4.14	556.812	0		R22_num1
R23	0	chols_c + h2o_c --> chol_c + h_c + so4_c	3.1.6.6	174.205	0		R23	0	chols_c + h2o_c --> chol_c + h_c + so4_c	3.1.6.6	174.205	0		R23	0	chols_c + h2o_c --> chol_c + h_c + so4_c	3.1.6.6	174.205	0		R23	0	chols_c + h2o_c --> chol_c + h_c + so4_c	3.1.6.6	174.205	0		R23	0	chols_c + h2o_c --> chol_c + h_c + so4_c	3.1.6.6	174.205	0		R23	0	chols_c + h2o_c --> chol_c + h_c + so4_c	3.1.6.6	174.205	0		R23	0	chols_c + h2o_c --> chol_c + h_c + so4_c	3.1.6.6	174.205	0		R23
R24	0	h2o_c + pap_c --> amp_c + pi_c	3.1.3.7,3.1.3.97	894.31	0		R24	0.480501	h2o_c + pap_c --> amp_c + pi_c	3.1.3.7,3.1.3.97	894.31	0.000537287		R24	0	h2o_c + pap_c --> amp_c + pi_c	3.1.3.7,3.1.3.97	894.31	0		R24	0	h2o_c + pap_c --> amp_c + pi_c	3.1.3.7,3.1.3.97	894.31	0		R24	0	h2o_c + pap_c --> amp_c + pi_c	3.1.3.7,3.1.3.97	894.31	0		R24	0	h2o_c + pap_c --> amp_c + pi_c	3.1.3.7,3.1.3.97	894.31	0		R24	0	h2o_c + pap_c --> amp_c + pi_c	3.1.3.7,3.1.3.97	894.31	0		R24
R25	0	0.2619 atp_c + 0.0187 damp_c + 0.01982 dcmp_c + 0.01982 dgmp_c + 0.0187 dtmp_c + 0.1849 h2o_c --> DNA_c + 0.2619 adp_c + 0.2619 pi_c	2.7.7.7,2.7.7.31,2.7.7.49	1970.7	0		R25	0	0.2619 atp_c + 0.0187 damp_c + 0.01982 dcmp_c + 0.01982 dgmp_c + 0.0187 dtmp_c + 0.1849 h2o_c --> DNA_c + 0.2619 adp_c + 0.2619 pi_c	2.7.7.7,2.7.7.31,2.7.7.49	1970.7	0		R25	-3.26827e-17	0.2619 atp_c + 0.0187 damp_c + 0.01982 dcmp_c + 0.01982 dgmp_c + 0.0187 dtmp_c + 0.1849 h2o_c --> DNA_c + 0.2619 adp_c + 0.2619 pi_c	2.7.7.7,2.7.7.31,2.7.7.49	1970.7	-1.65843e-20		R25	0	0.2619 atp_c + 0.0187 damp_c + 0.01982 dcmp_c + 0.01982 dgmp_c + 0.0187 dtmp_c + 0.1849 h2o_c --> DNA_c + 0.2619 adp_c + 0.2619 pi_c	2.7.7.7,2.7.7.31,2.7.7.49	1970.7	0		R25	0	0.2619 atp_c + 0.0187 damp_c + 0.01982 dcmp_c + 0.01982 dgmp_c + 0.0187 dtmp_c + 0.1849 h2o_c --> DNA_c + 0.2619 adp_c + 0.2619 pi_c	2.7.7.7,2.7.7.31,2.7.7.49	1970.7	0		R25	0	0.2619 atp_c + 0.0187 damp_c + 0.01982 dcmp_c + 0.01982 dgmp_c + 0.0187 dtmp_c + 0.1849 h2o_c --> DNA_c + 0.2619 adp_c + 0.2619 pi_c	2.7.7.7,2.7.7.31,2.7.7.49	1970.7	0		R25	0	0.2619 atp_c + 0.0187 damp_c + 0.01982 dcmp_c + 0.01982 dgmp_c + 0.0187 dtmp_c + 0.1849 h2o_c --> DNA_c + 0.2619 adp_c + 0.2619 pi_c	2.7.7.7,2.7.7.31,2.7.7.49	1970.7	0		R25
R26_num1	0	accoa_m + crn_m --> acrn_m + coa_m	2.3.1.7	1430.5	0		R26_num1	0	accoa_m + crn_m --> acrn_m + coa_m	2.3.1.7	1430.5	0		R26_num1	0	accoa_m + crn_m --> acrn_m + coa_m	2.3.1.7	1430.5	0		R26_num1	0	accoa_m + crn_m --> acrn_m + coa_m	2.3.1.7	1430.5	0		R26_num1	0	accoa_m + crn_m --> acrn_m + coa_m	2.3.1.7	1430.5	0		R26_num1	0	accoa_m + crn_m --> acrn_m + coa_m	2.3.1.7	1430.5	0		R26_num1	0	accoa_m + crn_m --> acrn_m + coa_m	2.3.1.7	1430.5	0		R26_num1
R27_num1	0	accoa_c + crn_c --> acrn_c + coa_c	2.3.1.7	1430.5	0		R27_num1	0	accoa_c + crn_c --> acrn_c + coa_c	2.3.1.7	1430.5	0		R27_num1	0	accoa_c + crn_c --> acrn_c + coa_c	2.3.1.7	1430.5	0		R27_num1	0	accoa_c + crn_c --> acrn_c + coa_c	2.3.1.7	1430.5	0		R27_num1	0	accoa_c + crn_c --> acrn_c + coa_c	2.3.1.7	1430.5	0		R27_num1	0	accoa_c + crn_c --> acrn_c + coa_c	2.3.1.7	1430.5	0		R27_num1	0	accoa_c + crn_c --> acrn_c + coa_c	2.3.1.7	1430.5	0		R27_num1
R28_num1	0	dhap_c + h2o_c --> dha_c + pi_c	3.1.3.1,3.1.3.2	1162.29	0		R28_num1	0	dhap_c + h2o_c --> dha_c + pi_c	3.1.3.1,3.1.3.2	1162.29	0		R28_num1	0	dhap_c + h2o_c --> dha_c + pi_c	3.1.3.1,3.1.3.2	1162.29	0		R28_num1	0	dhap_c + h2o_c --> dha_c + pi_c	3.1.3.1,3.1.3.2	1162.29	0		R28_num1	0	dhap_c + h2o_c --> dha_c + pi_c	3.1.3.1,3.1.3.2	1162.29	0		R28_num1	0	dhap_c + h2o_c --> dha_c + pi_c	3.1.3.1,3.1.3.2	1162.29	0		R28_num1	0	dhap_c + h2o_c --> dha_c + pi_c	3.1.3.1,3.1.3.2	1162.29	0		R28_num1
R29	0	acald_c + thmpp_c --> 2ahethmpp_c	4.1.1.1	477.043	0		R29	0	acald_c + thmpp_c --> 2ahethmpp_c	4.1.1.1	477.043	0		R29	0	acald_c + thmpp_c --> 2ahethmpp_c	4.1.1.1	477.043	0		R29	0	acald_c + thmpp_c --> 2ahethmpp_c	4.1.1.1	477.043	0		R29	0	acald_c + thmpp_c --> 2ahethmpp_c	4.1.1.1	477.043	0		R29	0	acald_c + thmpp_c --> 2ahethmpp_c	4.1.1.1	477.043	0		R29	0	acald_c + thmpp_c --> 2ahethmpp_c	4.1.1.1	477.043	0		R29
R30	0	atp_c + h2o_c + pyr_c --> amp_c + 2.0 h_c + pep_c + pi_c	2.7.9.2	101.71	0		R30	0	atp_c + h2o_c + pyr_c --> amp_c + 2.0 h_c + pep_c + pi_c	2.7.9.2	101.71	0		R30	0	atp_c + h2o_c + pyr_c --> amp_c + 2.0 h_c + pep_c + pi_c	2.7.9.2	101.71	0		R30	0	atp_c + h2o_c + pyr_c --> amp_c + 2.0 h_c + pep_c + pi_c	2.7.9.2	101.71	0		R30	0	atp_c + h2o_c + pyr_c --> amp_c + 2.0 h_c + pep_c + pi_c	2.7.9.2	101.71	0		R30	0	atp_c + h2o_c + pyr_c --> amp_c + 2.0 h_c + pep_c + pi_c	2.7.9.2	101.71	0		R30	0	atp_c + h2o_c + pyr_c --> amp_c + 2.0 h_c + pep_c + pi_c	2.7.9.2	101.71	0		R30
R31_num1	0	h2o_c + nad_c + ppal_c --> PROP_c + 2.0 h_c + nadh_c	1.2.1.3,1.2.1.5	1537.46	0		R31_num1	0	h2o_c + nad_c + ppal_c --> PROP_c + 2.0 h_c + nadh_c	1.2.1.3,1.2.1.5	1537.46	0		R31_num1	0	h2o_c + nad_c + ppal_c --> PROP_c + 2.0 h_c + nadh_c	1.2.1.3,1.2.1.5	1537.46	0		R31_num1	0	h2o_c + nad_c + ppal_c --> PROP_c + 2.0 h_c + nadh_c	1.2.1.3,1.2.1.5	1537.46	0		R31_num1	0	h2o_c + nad_c + ppal_c --> PROP_c + 2.0 h_c + nadh_c	1.2.1.3,1.2.1.5	1537.46	0		R31_num1	0	h2o_c + nad_c + ppal_c --> PROP_c + 2.0 h_c + nadh_c	1.2.1.3,1.2.1.5	1537.46	0		R31_num1	0	h2o_c + nad_c + ppal_c --> PROP_c + 2.0 h_c + nadh_c	1.2.1.3,1.2.1.5	1537.46	0		R31_num1
R32_num1	0	acald_c + h2o_c + nad_c --> ac_c + 2.0 h_c + nadh_c	1.2.1.3,1.2.1.5	1248.26	0		R32_num1	0	acald_c + h2o_c + nad_c --> ac_c + 2.0 h_c + nadh_c	1.2.1.3,1.2.1.5	1248.26	0		R32_num1	2	acald_c + h2o_c + nad_c --> ac_c + 2.0 h_c + nadh_c	1.2.1.3,1.2.1.5	1248.26	0.00160223		R32_num1	0	acald_c + h2o_c + nad_c --> ac_c + 2.0 h_c + nadh_c	1.2.1.3,1.2.1.5	1248.26	0		R32_num1	2.32536e-16	acald_c + h2o_c + nad_c --> ac_c + 2.0 h_c + nadh_c	1.2.1.3,1.2.1.5	1248.26	1.86289e-19		R32_num1	0	acald_c + h2o_c + nad_c --> ac_c + 2.0 h_c + nadh_c	1.2.1.3,1.2.1.5	1248.26	0		R32_num1	0	acald_c + h2o_c + nad_c --> ac_c + 2.0 h_c + nadh_c	1.2.1.3,1.2.1.5	1248.26	0		R32_num1
R33_num1	0	acald_m + h2o_m + nad_m --> ac_m + 2.0 h_m + nadh_m	1.2.1.3,1.2.1.5	1248.26	0		R33_num1	0	acald_m + h2o_m + nad_m --> ac_m + 2.0 h_m + nadh_m	1.2.1.3,1.2.1.5	1248.26	0		R33_num1	0	acald_m + h2o_m + nad_m --> ac_m + 2.0 h_m + nadh_m	1.2.1.3,1.2.1.5	1248.26	0		R33_num1	0	acald_m + h2o_m + nad_m --> ac_m + 2.0 h_m + nadh_m	1.2.1.3,1.2.1.5	1248.26	0		R33_num1	0	acald_m + h2o_m + nad_m --> ac_m + 2.0 h_m + nadh_m	1.2.1.3,1.2.1.5	1248.26	0		R33_num1	0	acald_m + h2o_m + nad_m --> ac_m + 2.0 h_m + nadh_m	1.2.1.3,1.2.1.5	1248.26	0		R33_num1	0	acald_m + h2o_m + nad_m --> ac_m + 2.0 h_m + nadh_m	1.2.1.3,1.2.1.5	1248.26	0		R33_num1
R34_num1	0	acald_m + h2o_m + nadp_m --> ac_m + 2.0 h_m + nadph_m	1.2.1.4,1.2.1.5,1.2.1.-	466.483	0		R34_num1	0	acald_m + h2o_m + nadp_m --> ac_m + 2.0 h_m + nadph_m	1.2.1.4,1.2.1.5,1.2.1.-	466.483	0		R34_num1	0	acald_m + h2o_m + nadp_m --> ac_m + 2.0 h_m + nadph_m	1.2.1.4,1.2.1.5,1.2.1.-	466.483	0		R34_num1	0	acald_m + h2o_m + nadp_m --> ac_m + 2.0 h_m + nadph_m	1.2.1.4,1.2.1.5,1.2.1.-	466.483	0		R34_num1	0	acald_m + h2o_m + nadp_m --> ac_m + 2.0 h_m + nadph_m	1.2.1.4,1.2.1.5,1.2.1.-	466.483	0		R34_num1	0	acald_m + h2o_m + nadp_m --> ac_m + 2.0 h_m + nadph_m	1.2.1.4,1.2.1.5,1.2.1.-	466.483	0		R34_num1	0	acald_m + h2o_m + nadp_m --> ac_m + 2.0 h_m + nadph_m	1.2.1.4,1.2.1.5,1.2.1.-	466.483	0		R34_num1
R35_num1	0	h_c + nadh_c + pyr_c --> lac__L_c + nad_c	1.1.1.27	43121.8	0		R35_num1	0	h_c + nadh_c + pyr_c --> lac__L_c + nad_c	1.1.1.27	43121.8	0		R35_num1	0	h_c + nadh_c + pyr_c --> lac__L_c + nad_c	1.1.1.27	43121.8	0		R35_num1	0	h_c + nadh_c + pyr_c --> lac__L_c + nad_c	1.1.1.27	43121.8	0		R35_num1	0	h_c + nadh_c + pyr_c --> lac__L_c + nad_c	1.1.1.27	43121.8	0		R35_num1	0	h_c + nadh_c + pyr_c --> lac__L_c + nad_c	1.1.1.27	43121.8	0		R35_num1	0	h_c + nadh_c + pyr_c --> lac__L_c + nad_c	1.1.1.27	43121.8	0		R35_num1
R36_num1	0	adp_c + h_c + pep_c --> atp_c + pyr_c	2.7.1.40	1272.16	0		R36_num1	0	adp_c + h_c + pep_c --> atp_c + pyr_c	2.7.1.40	1272.16	0		R36_num1	0	adp_c + h_c + pep_c --> atp_c + pyr_c	2.7.1.40	1272.16	0		R36_num1	0	adp_c + h_c + pep_c --> atp_c + pyr_c	2.7.1.40	1272.16	0		R36_num1	0	adp_c + h_c + pep_c --> atp_c + pyr_c	2.7.1.40	1272.16	0		R36_num1	0	adp_c + h_c + pep_c --> atp_c + pyr_c	2.7.1.40	1272.16	0		R36_num1	0	adp_c + h_c + pep_c --> atp_c + pyr_c	2.7.1.40	1272.16	0		R36_num1
R37	0	fdp_B_c + h2o_c --> f6p_c + pi_c	3.1.3.11	968.787	0		R37	0	fdp_B_c + h2o_c --> f6p_c + pi_c	3.1.3.11	968.787	0		R37	0	fdp_B_c + h2o_c --> f6p_c + pi_c	3.1.3.11	968.787	0		R37	0	fdp_B_c + h2o_c --> f6p_c + pi_c	3.1.3.11	968.787	0		R37	0	fdp_B_c + h2o_c --> f6p_c + pi_c	3.1.3.11	968.787	0		R37	0	fdp_B_c + h2o_c --> f6p_c + pi_c	3.1.3.11	968.787	0		R37	0	fdp_B_c + h2o_c --> f6p_c + pi_c	3.1.3.11	968.787	0		R37
R38	0	g6p_c --> g6p_A_c	5.1.3.15	3869.59	0		R38	0	g6p_c --> g6p_A_c	5.1.3.15	3869.59	0		R38	0	g6p_c --> g6p_A_c	5.1.3.15	3869.59	0		R38	0	g6p_c --> g6p_A_c	5.1.3.15	3869.59	0		R38	0	g6p_c --> g6p_A_c	5.1.3.15	3869.59	0		R38	0	g6p_c --> g6p_A_c	5.1.3.15	3869.59	0		R38	0	g6p_c --> g6p_A_c	5.1.3.15	3869.59	0		R38
R39	0	g6p_A_c --> g6p_B_c	5.1.3.15	3869.59	0		R39	0	g6p_A_c --> g6p_B_c	5.1.3.15	3869.59	0		R39	0	g6p_A_c --> g6p_B_c	5.1.3.15	3869.59	0		R39	0	g6p_A_c --> g6p_B_c	5.1.3.15	3869.59	0		R39	0	g6p_A_c --> g6p_B_c	5.1.3.15	3869.59	0		R39	0	g6p_A_c --> g6p_B_c	5.1.3.15	3869.59	0		R39	0	g6p_A_c --> g6p_B_c	5.1.3.15	3869.59	0		R39
R40	-1.26042e-15	2pg_c --> h2o_c + pep_c	4.2.1.11	1742.65	-7.23275e-19		R40	2.79249	2pg_c --> h2o_c + pep_c	4.2.1.11	1742.65	0.00160243		R40	5	2pg_c --> h2o_c + pep_c	4.2.1.11	1742.65	0.00286919		R40	0.369844	2pg_c --> h2o_c + pep_c	4.2.1.11	1742.65	0.00021223		R40	0.303548	2pg_c --> h2o_c + pep_c	4.2.1.11	1742.65	0.000174187		R40	0.434294	2pg_c --> h2o_c + pep_c	4.2.1.11	1742.65	0.000249214		R40	0.303548	2pg_c --> h2o_c + pep_c	4.2.1.11	1742.65	0.000174187		R40
R41_num1	0	ac_m + atp_m + coa_m --> accoa_m + amp_m + ppi_m	6.2.1.1	1696.58	0		R41_num1	0	ac_m + atp_m + coa_m --> accoa_m + amp_m + ppi_m	6.2.1.1	1696.58	0		R41_num1	2	ac_m + atp_m + coa_m --> accoa_m + amp_m + ppi_m	6.2.1.1	1696.58	0.00117884		R41_num1	0	ac_m + atp_m + coa_m --> accoa_m + amp_m + ppi_m	6.2.1.1	1696.58	0		R41_num1	0	ac_m + atp_m + coa_m --> accoa_m + amp_m + ppi_m	6.2.1.1	1696.58	0		R41_num1	0	ac_m + atp_m + coa_m --> accoa_m + amp_m + ppi_m	6.2.1.1	1696.58	0		R41_num1	0	ac_m + atp_m + coa_m --> accoa_m + amp_m + ppi_m	6.2.1.1	1696.58	0		R41_num1
R42_num1	0	3pg_c --> 2pg_c	5.4.2.11,5.4.2.12	5606.75	0		R42_num1	0	3pg_c --> 2pg_c	5.4.2.11,5.4.2.12	5606.75	0		R42_num1	0	3pg_c --> 2pg_c	5.4.2.11,5.4.2.12	5606.75	0		R42_num1	0	3pg_c --> 2pg_c	5.4.2.11,5.4.2.12	5606.75	0		R42_num1	0	3pg_c --> 2pg_c	5.4.2.11,5.4.2.12	5606.75	0		R42_num1	0	3pg_c --> 2pg_c	5.4.2.11,5.4.2.12	5606.75	0		R42_num1	0	3pg_c --> 2pg_c	5.4.2.11,5.4.2.12	5606.75	0		R42_num1
R43_num1	0	dhap_c --> g3p_c	5.3.1.1	301.119	0		R43_num1	0	dhap_c --> g3p_c	5.3.1.1	301.119	0		R43_num1	0	dhap_c --> g3p_c	5.3.1.1	301.119	0		R43_num1	0	dhap_c --> g3p_c	5.3.1.1	301.119	0		R43_num1	0	dhap_c --> g3p_c	5.3.1.1	301.119	0		R43_num1	0	dhap_c --> g3p_c	5.3.1.1	301.119	0		R43_num1	0	dhap_c --> g3p_c	5.3.1.1	301.119	0		R43_num1
R44	0	C15973_m + nad_m --> LIPO_m + h_m + nadh_m	1.8.1.4	8233.89	0		R44	0	C15973_m + nad_m --> LIPO_m + h_m + nadh_m	1.8.1.4	8233.89	0		R44	0	C15973_m + nad_m --> LIPO_m + h_m + nadh_m	1.8.1.4	8233.89	0		R44	0	C15973_m + nad_m --> LIPO_m + h_m + nadh_m	1.8.1.4	8233.89	0		R44	0	C15973_m + nad_m --> LIPO_m + h_m + nadh_m	1.8.1.4	8233.89	0		R44	0	C15973_m + nad_m --> LIPO_m + h_m + nadh_m	1.8.1.4	8233.89	0		R44	0	C15973_m + nad_m --> LIPO_m + h_m + nadh_m	1.8.1.4	8233.89	0		R44
R45	0	atp_c + oaa_c --> adp_c + co2_c + pep_c	4.1.1.49	913.283	0		R45	0	atp_c + oaa_c --> adp_c + co2_c + pep_c	4.1.1.49	913.283	0		R45	0	atp_c + oaa_c --> adp_c + co2_c + pep_c	4.1.1.49	913.283	0		R45	0	atp_c + oaa_c --> adp_c + co2_c + pep_c	4.1.1.49	913.283	0		R45	0	atp_c + oaa_c --> adp_c + co2_c + pep_c	4.1.1.49	913.283	0		R45	0	atp_c + oaa_c --> adp_c + co2_c + pep_c	4.1.1.49	913.283	0		R45	0	atp_c + oaa_c --> adp_c + co2_c + pep_c	4.1.1.49	913.283	0		R45
R46	0	coa_m + nad_m + pyr_m --> accoa_m + co2_m + h_m + nadh_m	1.2.4.1	334.55	0		R46	1.35098	coa_m + nad_m + pyr_m --> accoa_m + co2_m + h_m + nadh_m	1.2.4.1	334.55	0.00403821		R46	1	coa_m + nad_m + pyr_m --> accoa_m + co2_m + h_m + nadh_m	1.2.4.1	334.55	0.00298909		R46	0.369844	coa_m + nad_m + pyr_m --> accoa_m + co2_m + h_m + nadh_m	1.2.4.1	334.55	0.0011055		R46	0.303548	coa_m + nad_m + pyr_m --> accoa_m + co2_m + h_m + nadh_m	1.2.4.1	334.55	0.000907333		R46	0.434294	coa_m + nad_m + pyr_m --> accoa_m + co2_m + h_m + nadh_m	1.2.4.1	334.55	0.00129815		R46	0.303548	coa_m + nad_m + pyr_m --> accoa_m + co2_m + h_m + nadh_m	1.2.4.1	334.55	0.000907333		R46
R47	0	2ahethmpp_m + LIPO_m --> adhlam_m + thmpp_m	1.2.4.1	503.526	0		R47	0	2ahethmpp_m + LIPO_m --> adhlam_m + thmpp_m	1.2.4.1	503.526	0		R47	0	2ahethmpp_m + LIPO_m --> adhlam_m + thmpp_m	1.2.4.1	503.526	0		R47	0	2ahethmpp_m + LIPO_m --> adhlam_m + thmpp_m	1.2.4.1	503.526	0		R47	0	2ahethmpp_m + LIPO_m --> adhlam_m + thmpp_m	1.2.4.1	503.526	0		R47	0	2ahethmpp_m + LIPO_m --> adhlam_m + thmpp_m	1.2.4.1	503.526	0		R47	0	2ahethmpp_m + LIPO_m --> adhlam_m + thmpp_m	1.2.4.1	503.526	0		R47
R48	0	h_m + pyr_m + thmpp_m --> 2ahethmpp_m + co2_m	1.2.4.1	246.456	0		R48	0	h_m + pyr_m + thmpp_m --> 2ahethmpp_m + co2_m	1.2.4.1	246.456	0		R48	0	h_m + pyr_m + thmpp_m --> 2ahethmpp_m + co2_m	1.2.4.1	246.456	0		R48	0	h_m + pyr_m + thmpp_m --> 2ahethmpp_m + co2_m	1.2.4.1	246.456	0		R48	0	h_m + pyr_m + thmpp_m --> 2ahethmpp_m + co2_m	1.2.4.1	246.456	0		R48	0	h_m + pyr_m + thmpp_m --> 2ahethmpp_m + co2_m	1.2.4.1	246.456	0		R48	0	h_m + pyr_m + thmpp_m --> 2ahethmpp_m + co2_m	1.2.4.1	246.456	0		R48
R49	0	h_c + pyr_c + thmpp_c --> 2ahethmpp_c + co2_c		491.458	0		R49	0	h_c + pyr_c + thmpp_c --> 2ahethmpp_c + co2_c		491.458	0		R49	0	h_c + pyr_c + thmpp_c --> 2ahethmpp_c + co2_c		491.458	0		R49	0	h_c + pyr_c + thmpp_c --> 2ahethmpp_c + co2_c		491.458	0		R49	-1.00531e-16	h_c + pyr_c + thmpp_c --> 2ahethmpp_c + co2_c		491.458	-2.04556e-19		R49	0	h_c + pyr_c + thmpp_c --> 2ahethmpp_c + co2_c		491.458	0		R49	0	h_c + pyr_c + thmpp_c --> 2ahethmpp_c + co2_c		491.458	0		R49
R50	5	g3p_c + nad_c + pi_c --> 13dpg_c + h_c + nadh_c	1.2.1.12,1.2.1.59	24759.8	0.00020194		R50	3.79875	g3p_c + nad_c + pi_c --> 13dpg_c + h_c + nadh_c	1.2.1.12,1.2.1.59	24759.8	0.000153424		R50	5	g3p_c + nad_c + pi_c --> 13dpg_c + h_c + nadh_c	1.2.1.12,1.2.1.59	24759.8	0.00020194		R50	0.369844	g3p_c + nad_c + pi_c --> 13dpg_c + h_c + nadh_c	1.2.1.12,1.2.1.59	24759.8	1.49373e-05		R50	0.303548	g3p_c + nad_c + pi_c --> 13dpg_c + h_c + nadh_c	1.2.1.12,1.2.1.59	24759.8	1.22597e-05		R50	0.434294	g3p_c + nad_c + pi_c --> 13dpg_c + h_c + nadh_c	1.2.1.12,1.2.1.59	24759.8	1.75403e-05		R50	0.303548	g3p_c + nad_c + pi_c --> 13dpg_c + h_c + nadh_c	1.2.1.12,1.2.1.59	24759.8	1.22597e-05		R50
R51	5	13dpg_c + adp_c --> 3pg_c + atp_c	2.7.2.3	14639.8	0.000341534		R51	3.79875	13dpg_c + adp_c --> 3pg_c + atp_c	2.7.2.3	14639.8	0.00025948		R51	5	13dpg_c + adp_c --> 3pg_c + atp_c	2.7.2.3	14639.8	0.000341534		R51	0.369844	13dpg_c + adp_c --> 3pg_c + atp_c	2.7.2.3	14639.8	2.52629e-05		R51	0.303548	13dpg_c + adp_c --> 3pg_c + atp_c	2.7.2.3	14639.8	2.07344e-05		R51	0.434294	13dpg_c + adp_c --> 3pg_c + atp_c	2.7.2.3	14639.8	2.96653e-05		R51	0.303548	13dpg_c + adp_c --> 3pg_c + atp_c	2.7.2.3	14639.8	2.07344e-05		R51
R52	0	R5P_c --> r1p_c	5.4.2.2,5.4.2.7	8326.52	0		R52	0	R5P_c --> r1p_c	5.4.2.2,5.4.2.7	8326.52	0		R52	-2.83331e-18	R5P_c --> r1p_c	5.4.2.2,5.4.2.7	8326.52	-3.40275e-22		R52	0	R5P_c --> r1p_c	5.4.2.2,5.4.2.7	8326.52	0		R52	0	R5P_c --> r1p_c	5.4.2.2,5.4.2.7	8326.52	0		R52	0	R5P_c --> r1p_c	5.4.2.2,5.4.2.7	8326.52	0		R52	0	R5P_c --> r1p_c	5.4.2.2,5.4.2.7	8326.52	0		R52
R53_num1	0	R5P_c + atp_c --> amp_c + h_c + prpp_c	2.7.6.1	337.515	0		R53_num1	0	R5P_c + atp_c --> amp_c + h_c + prpp_c	2.7.6.1	337.515	0		R53_num1	0	R5P_c + atp_c --> amp_c + h_c + prpp_c	2.7.6.1	337.515	0		R53_num1	0	R5P_c + atp_c --> amp_c + h_c + prpp_c	2.7.6.1	337.515	0		R53_num1	0	R5P_c + atp_c --> amp_c + h_c + prpp_c	2.7.6.1	337.515	0		R53_num1	0	R5P_c + atp_c --> amp_c + h_c + prpp_c	2.7.6.1	337.515	0		R53_num1	0	R5P_c + atp_c --> amp_c + h_c + prpp_c	2.7.6.1	337.515	0		R53_num1
R54	-8.88178e-16	ru5p__D_c --> xu5p__D_c	5.1.3.1	941860	-9.43004e-22		R54	0.480501	ru5p__D_c --> xu5p__D_c	5.1.3.1	941860	5.10162e-07		R54	0	ru5p__D_c --> xu5p__D_c	5.1.3.1	941860	0		R54	0	ru5p__D_c --> xu5p__D_c	5.1.3.1	941860	0		R54	-6.10623e-16	ru5p__D_c --> xu5p__D_c	5.1.3.1	941860	-6.48315e-22		R54	0	ru5p__D_c --> xu5p__D_c	5.1.3.1	941860	0		R54	0	ru5p__D_c --> xu5p__D_c	5.1.3.1	941860	0		R54
R55	-1.77636e-15	g6p_c + nadp_c --> 6pgl_c + h_c + nadph_c	1.1.1.49,1.1.1.363	495843	-3.5825e-21		R55	1.20125	g6p_c + nadp_c --> 6pgl_c + h_c + nadph_c	1.1.1.49,1.1.1.363	495843	2.42265e-06		R55	0	g6p_c + nadp_c --> 6pgl_c + h_c + nadph_c	1.1.1.49,1.1.1.363	495843	0		R55	-9.49241e-15	g6p_c + nadp_c --> 6pgl_c + h_c + nadph_c	1.1.1.49,1.1.1.363	495843	-1.9144e-20		R55	-8.13877e-16	g6p_c + nadp_c --> 6pgl_c + h_c + nadph_c	1.1.1.49,1.1.1.363	495843	-1.6414e-21		R55	-4.70303e-17	g6p_c + nadp_c --> 6pgl_c + h_c + nadph_c	1.1.1.49,1.1.1.363	495843	-9.48491e-23		R55	0	g6p_c + nadp_c --> 6pgl_c + h_c + nadph_c	1.1.1.49,1.1.1.363	495843	0		R55
R56_num1	0	6pgc_c + nadp_c --> co2_c + nadph_c + ru5p__D_c	1.1.1.44,1.1.1.351	2034.07	0		R56_num1	0	6pgc_c + nadp_c --> co2_c + nadph_c + ru5p__D_c	1.1.1.44,1.1.1.351	2034.07	0		R56_num1	0	6pgc_c + nadp_c --> co2_c + nadph_c + ru5p__D_c	1.1.1.44,1.1.1.351	2034.07	0		R56_num1	0	6pgc_c + nadp_c --> co2_c + nadph_c + ru5p__D_c	1.1.1.44,1.1.1.351	2034.07	0		R56_num1	0	6pgc_c + nadp_c --> co2_c + nadph_c + ru5p__D_c	1.1.1.44,1.1.1.351	2034.07	0		R56_num1	0	6pgc_c + nadp_c --> co2_c + nadph_c + ru5p__D_c	1.1.1.44,1.1.1.351	2034.07	0		R56_num1	0	6pgc_c + nadp_c --> co2_c + nadph_c + ru5p__D_c	1.1.1.44,1.1.1.351	2034.07	0		R56_num1
R58	0	R5P_c --> ru5p__D_c	5.3.1.6	20876.4	0		R58	0	R5P_c --> ru5p__D_c	5.3.1.6	20876.4	0		R58	0	R5P_c --> ru5p__D_c	5.3.1.6	20876.4	0		R58	0	R5P_c --> ru5p__D_c	5.3.1.6	20876.4	0		R58	0	R5P_c --> ru5p__D_c	5.3.1.6	20876.4	0		R58	0	R5P_c --> ru5p__D_c	5.3.1.6	20876.4	0		R58	0	R5P_c --> ru5p__D_c	5.3.1.6	20876.4	0		R58
R59_num1	0	pi_c + xu5p__D_c --> actp_c + g3p_c + h2o_c	4.1.2.9	306.843	0		R59_num1	0	pi_c + xu5p__D_c --> actp_c + g3p_c + h2o_c	4.1.2.9	306.843	0		R59_num1	0	pi_c + xu5p__D_c --> actp_c + g3p_c + h2o_c	4.1.2.9	306.843	0		R59_num1	0	pi_c + xu5p__D_c --> actp_c + g3p_c + h2o_c	4.1.2.9	306.843	0		R59_num1	0	pi_c + xu5p__D_c --> actp_c + g3p_c + h2o_c	4.1.2.9	306.843	0		R59_num1	0	pi_c + xu5p__D_c --> actp_c + g3p_c + h2o_c	4.1.2.9	306.843	0		R59_num1	0	pi_c + xu5p__D_c --> actp_c + g3p_c + h2o_c	4.1.2.9	306.843	0		R59_num1
R60	-1.77636e-15	6pgl_c + h2o_c --> 6pgc_c + h_c	3.1.1.31	2017.12	-8.8064e-19		R60	1.20125	6pgl_c + h2o_c --> 6pgc_c + h_c	3.1.1.31	2017.12	0.000595529		R60	0	6pgl_c + h2o_c --> 6pgc_c + h_c	3.1.1.31	2017.12	0		R60	-9.49241e-15	6pgl_c + h2o_c --> 6pgc_c + h_c	3.1.1.31	2017.12	-4.70592e-18		R60	-8.13877e-16	6pgl_c + h2o_c --> 6pgc_c + h_c	3.1.1.31	2017.12	-4.03485e-19		R60	-4.70303e-17	6pgl_c + h2o_c --> 6pgc_c + h_c	3.1.1.31	2017.12	-2.33156e-20		R60	0	6pgl_c + h2o_c --> 6pgc_c + h_c	3.1.1.31	2017.12	0		R60
R61	-4.44089e-16	R5P_c + xu5p__D_c --> g3p_c + s7p_c	2.2.1.1,2.2.1.3	390.601	-1.13694e-18		R61	0.24025	R5P_c + xu5p__D_c --> g3p_c + s7p_c	2.2.1.1,2.2.1.3	390.601	0.000615079		R61	0	R5P_c + xu5p__D_c --> g3p_c + s7p_c	2.2.1.1,2.2.1.3	390.601	0		R61	1.15754	R5P_c + xu5p__D_c --> g3p_c + s7p_c	2.2.1.1,2.2.1.3	390.601	0.00296348		R61	-3.05311e-16	R5P_c + xu5p__D_c --> g3p_c + s7p_c	2.2.1.1,2.2.1.3	390.601	-7.81646e-19		R61	0	R5P_c + xu5p__D_c --> g3p_c + s7p_c	2.2.1.1,2.2.1.3	390.601	0		R61	0	R5P_c + xu5p__D_c --> g3p_c + s7p_c	2.2.1.1,2.2.1.3	390.601	0		R61
R62_num1	-4.44089e-16	g3p_c + s7p_c --> e4p_c + f6p_c	2.2.1.2	5551.92	-7.99884e-20		R62_num1	0.24025	g3p_c + s7p_c --> e4p_c + f6p_c	2.2.1.2	5551.92	4.32734e-05		R62_num1	0	g3p_c + s7p_c --> e4p_c + f6p_c	2.2.1.2	5551.92	0		R62_num1	1.15754	g3p_c + s7p_c --> e4p_c + f6p_c	2.2.1.2	5551.92	0.000208493		R62_num1	-3.05311e-16	g3p_c + s7p_c --> e4p_c + f6p_c	2.2.1.2	5551.92	-5.4992e-20		R62_num1	0	g3p_c + s7p_c --> e4p_c + f6p_c	2.2.1.2	5551.92	0		R62_num1	0	g3p_c + s7p_c --> e4p_c + f6p_c	2.2.1.2	5551.92	0		R62_num1
R63	0	fald_c + xu5p__D_c --> dha_c + g3p_c	2.2.1.1,2.2.1.3	414.563	0		R63	0	fald_c + xu5p__D_c --> dha_c + g3p_c	2.2.1.1,2.2.1.3	414.563	0		R63	-1.41438e-16	fald_c + xu5p__D_c --> dha_c + g3p_c	2.2.1.1,2.2.1.3	414.563	-3.41174e-19		R63	0	fald_c + xu5p__D_c --> dha_c + g3p_c	2.2.1.1,2.2.1.3	414.563	0		R63	0	fald_c + xu5p__D_c --> dha_c + g3p_c	2.2.1.1,2.2.1.3	414.563	0		R63	0	fald_c + xu5p__D_c --> dha_c + g3p_c	2.2.1.1,2.2.1.3	414.563	0		R63	0	fald_c + xu5p__D_c --> dha_c + g3p_c	2.2.1.1,2.2.1.3	414.563	0		R63
R64	0	atp_c + rib__D_c --> R5P_c + adp_c + h_c	2.7.1.15	318.645	0		R64	0	atp_c + rib__D_c --> R5P_c + adp_c + h_c	2.7.1.15	318.645	0		R64	0	atp_c + rib__D_c --> R5P_c + adp_c + h_c	2.7.1.15	318.645	0		R64	0	atp_c + rib__D_c --> R5P_c + adp_c + h_c	2.7.1.15	318.645	0		R64	0	atp_c + rib__D_c --> R5P_c + adp_c + h_c	2.7.1.15	318.645	0		R64	0	atp_c + rib__D_c --> R5P_c + adp_c + h_c	2.7.1.15	318.645	0		R64	0	atp_c + rib__D_c --> R5P_c + adp_c + h_c	2.7.1.15	318.645	0		R64
R65_num1	0	BDGLC_c + nad_c --> g15lac_c + h_c + nadh_c	1.1.1.47	3614.83	0		R65_num1	0	BDGLC_c + nad_c --> g15lac_c + h_c + nadh_c	1.1.1.47	3614.83	0		R65_num1	0	BDGLC_c + nad_c --> g15lac_c + h_c + nadh_c	1.1.1.47	3614.83	0		R65_num1	0	BDGLC_c + nad_c --> g15lac_c + h_c + nadh_c	1.1.1.47	3614.83	0		R65_num1	0	BDGLC_c + nad_c --> g15lac_c + h_c + nadh_c	1.1.1.47	3614.83	0		R65_num1	0	BDGLC_c + nad_c --> g15lac_c + h_c + nadh_c	1.1.1.47	3614.83	0		R65_num1	0	BDGLC_c + nad_c --> g15lac_c + h_c + nadh_c	1.1.1.47	3614.83	0		R65_num1
R66_num1	0	BDGLC_c + nadp_c --> g15lac_c + h_c + nadph_c	1.1.1.119,1.1.1.359,1.1.1.360	3614.83	0		R66_num1	0	BDGLC_c + nadp_c --> g15lac_c + h_c + nadph_c	1.1.1.119,1.1.1.359,1.1.1.360	3614.83	0		R66_num1	0	BDGLC_c + nadp_c --> g15lac_c + h_c + nadph_c	1.1.1.119,1.1.1.359,1.1.1.360	3614.83	0		R66_num1	0	BDGLC_c + nadp_c --> g15lac_c + h_c + nadph_c	1.1.1.119,1.1.1.359,1.1.1.360	3614.83	0		R66_num1	0	BDGLC_c + nadp_c --> g15lac_c + h_c + nadph_c	1.1.1.119,1.1.1.359,1.1.1.360	3614.83	0		R66_num1	0	BDGLC_c + nadp_c --> g15lac_c + h_c + nadph_c	1.1.1.119,1.1.1.359,1.1.1.360	3614.83	0		R66_num1	0	BDGLC_c + nadp_c --> g15lac_c + h_c + nadph_c	1.1.1.119,1.1.1.359,1.1.1.360	3614.83	0		R66_num1
R67	0	atp_c + glcn__D_c --> 6pgc_c + adp_c + h_c	2.7.1.12	1534.65	0		R67	0	atp_c + glcn__D_c --> 6pgc_c + adp_c + h_c	2.7.1.12	1534.65	0		R67	0	atp_c + glcn__D_c --> 6pgc_c + adp_c + h_c	2.7.1.12	1534.65	0		R67	0	atp_c + glcn__D_c --> 6pgc_c + adp_c + h_c	2.7.1.12	1534.65	0		R67	0	atp_c + glcn__D_c --> 6pgc_c + adp_c + h_c	2.7.1.12	1534.65	0		R67	0	atp_c + glcn__D_c --> 6pgc_c + adp_c + h_c	2.7.1.12	1534.65	0		R67	0	atp_c + glcn__D_c --> 6pgc_c + adp_c + h_c	2.7.1.12	1534.65	0		R67
R68_num1	0	glcn__D_c --> 2ddglcn_c + h2o_c		416.138	0		R68_num1	0	glcn__D_c --> 2ddglcn_c + h2o_c		416.138	0		R68_num1	0	glcn__D_c --> 2ddglcn_c + h2o_c		416.138	0		R68_num1	0	glcn__D_c --> 2ddglcn_c + h2o_c		416.138	0		R68_num1	0	glcn__D_c --> 2ddglcn_c + h2o_c		416.138	0		R68_num1	0	glcn__D_c --> 2ddglcn_c + h2o_c		416.138	0		R68_num1	0	glcn__D_c --> 2ddglcn_c + h2o_c		416.138	0		R68_num1
R69	0	2dr5p_c --> acald_c + g3p_c	4.1.2.4				R69	0	2dr5p_c --> acald_c + g3p_c	4.1.2.4				R69	0	2dr5p_c --> acald_c + g3p_c	4.1.2.4				R69	0	2dr5p_c --> acald_c + g3p_c	4.1.2.4				R69	0	2dr5p_c --> acald_c + g3p_c	4.1.2.4				R69	0	2dr5p_c --> acald_c + g3p_c	4.1.2.4				R69	0	2dr5p_c --> acald_c + g3p_c	4.1.2.4				R69
R70	0	g15lac_c + h2o_c --> glcn__D_c + h_c	3.1.1.17	2150.33	0		R70	0	g15lac_c + h2o_c --> glcn__D_c + h_c	3.1.1.17	2150.33	0		R70	0	g15lac_c + h2o_c --> glcn__D_c + h_c	3.1.1.17	2150.33	0		R70	0	g15lac_c + h2o_c --> glcn__D_c + h_c	3.1.1.17	2150.33	0		R70	0	g15lac_c + h2o_c --> glcn__D_c + h_c	3.1.1.17	2150.33	0		R70	0	g15lac_c + h2o_c --> glcn__D_c + h_c	3.1.1.17	2150.33	0		R70	0	g15lac_c + h2o_c --> glcn__D_c + h_c	3.1.1.17	2150.33	0		R70
R71	0	P_BENZOQUINONE_c + glc__D_c --> g15lac_c + hqn_c	1.1.5.9	1824.87	0		R71	0	P_BENZOQUINONE_c + glc__D_c --> g15lac_c + hqn_c	1.1.5.9	1824.87	0		R71	0	P_BENZOQUINONE_c + glc__D_c --> g15lac_c + hqn_c	1.1.5.9	1824.87	0		R71	0	P_BENZOQUINONE_c + glc__D_c --> g15lac_c + hqn_c	1.1.5.9	1824.87	0		R71	0	P_BENZOQUINONE_c + glc__D_c --> g15lac_c + hqn_c	1.1.5.9	1824.87	0		R71	0	P_BENZOQUINONE_c + glc__D_c --> g15lac_c + hqn_c	1.1.5.9	1824.87	0		R71	0	P_BENZOQUINONE_c + glc__D_c --> g15lac_c + hqn_c	1.1.5.9	1824.87	0		R71
R72	0	g6p_B_c + nad_c --> 6pgl_c + h_c + nadh_c	1.1.1.363,1.1.1.388	10824	0		R72	0	g6p_B_c + nad_c --> 6pgl_c + h_c + nadh_c	1.1.1.363,1.1.1.388	10824	0		R72	0	g6p_B_c + nad_c --> 6pgl_c + h_c + nadh_c	1.1.1.363,1.1.1.388	10824	0		R72	0	g6p_B_c + nad_c --> 6pgl_c + h_c + nadh_c	1.1.1.363,1.1.1.388	10824	0		R72	0	g6p_B_c + nad_c --> 6pgl_c + h_c + nadh_c	1.1.1.363,1.1.1.388	10824	0		R72	0	g6p_B_c + nad_c --> 6pgl_c + h_c + nadh_c	1.1.1.363,1.1.1.388	10824	0		R72	0	g6p_B_c + nad_c --> 6pgl_c + h_c + nadh_c	1.1.1.363,1.1.1.388	10824	0		R72
R73	0	atp_c + drib_c --> 2dr5p_c + adp_c + h_c	2.7.1.229				R73	0	atp_c + drib_c --> 2dr5p_c + adp_c + h_c	2.7.1.229				R73	0	atp_c + drib_c --> 2dr5p_c + adp_c + h_c	2.7.1.229				R73	0	atp_c + drib_c --> 2dr5p_c + adp_c + h_c	2.7.1.229				R73	0	atp_c + drib_c --> 2dr5p_c + adp_c + h_c	2.7.1.229				R73	0	atp_c + drib_c --> 2dr5p_c + adp_c + h_c	2.7.1.229				R73	0	atp_c + drib_c --> 2dr5p_c + adp_c + h_c	2.7.1.229				R73
R74	0	g1p_c + h_c + utp_c --> ppi_c + udpg_c	2.7.7.9,2.7.7.64	1156.78	0		R74	0	g1p_c + h_c + utp_c --> ppi_c + udpg_c	2.7.7.9,2.7.7.64	1156.78	0		R74	0	g1p_c + h_c + utp_c --> ppi_c + udpg_c	2.7.7.9,2.7.7.64	1156.78	0		R74	0	g1p_c + h_c + utp_c --> ppi_c + udpg_c	2.7.7.9,2.7.7.64	1156.78	0		R74	0	g1p_c + h_c + utp_c --> ppi_c + udpg_c	2.7.7.9,2.7.7.64	1156.78	0		R74	0	g1p_c + h_c + utp_c --> ppi_c + udpg_c	2.7.7.9,2.7.7.64	1156.78	0		R74	0	g1p_c + h_c + utp_c --> ppi_c + udpg_c	2.7.7.9,2.7.7.64	1156.78	0		R74
R75_num1	0	IDOL_c + nad_c --> h_c + nadh_c + srb__L_c	1.1.1.14	11926.5	0		R75_num1	0	IDOL_c + nad_c --> h_c + nadh_c + srb__L_c	1.1.1.14	11926.5	0		R75_num1	0	IDOL_c + nad_c --> h_c + nadh_c + srb__L_c	1.1.1.14	11926.5	0		R75_num1	0	IDOL_c + nad_c --> h_c + nadh_c + srb__L_c	1.1.1.14	11926.5	0		R75_num1	0	IDOL_c + nad_c --> h_c + nadh_c + srb__L_c	1.1.1.14	11926.5	0		R75_num1	0	IDOL_c + nad_c --> h_c + nadh_c + srb__L_c	1.1.1.14	11926.5	0		R75_num1	0	IDOL_c + nad_c --> h_c + nadh_c + srb__L_c	1.1.1.14	11926.5	0		R75_num1
R76	0	h2o_c + 2.0 nad_c + udpg_c --> 3.0 h_c + 2.0 nadh_c + udpglcur_c	1.1.1.22	871.143	0		R76	0	h2o_c + 2.0 nad_c + udpg_c --> 3.0 h_c + 2.0 nadh_c + udpglcur_c	1.1.1.22	871.143	0		R76	0	h2o_c + 2.0 nad_c + udpg_c --> 3.0 h_c + 2.0 nadh_c + udpglcur_c	1.1.1.22	871.143	0		R76	0	h2o_c + 2.0 nad_c + udpg_c --> 3.0 h_c + 2.0 nadh_c + udpglcur_c	1.1.1.22	871.143	0		R76	0	h2o_c + 2.0 nad_c + udpg_c --> 3.0 h_c + 2.0 nadh_c + udpglcur_c	1.1.1.22	871.143	0		R76	0	h2o_c + 2.0 nad_c + udpg_c --> 3.0 h_c + 2.0 nadh_c + udpglcur_c	1.1.1.22	871.143	0		R76	0	h2o_c + 2.0 nad_c + udpg_c --> 3.0 h_c + 2.0 nadh_c + udpglcur_c	1.1.1.22	871.143	0		R76
R77	0	galur_c + h_c + nadph_c --> galctn__L_c + nadp_c	1.1.1.365,1.1.1.-	677.795	0		R77	0	galur_c + h_c + nadph_c --> galctn__L_c + nadp_c	1.1.1.365,1.1.1.-	677.795	0		R77	0	galur_c + h_c + nadph_c --> galctn__L_c + nadp_c	1.1.1.365,1.1.1.-	677.795	0		R77	0	galur_c + h_c + nadph_c --> galctn__L_c + nadp_c	1.1.1.365,1.1.1.-	677.795	0		R77	0	galur_c + h_c + nadph_c --> galctn__L_c + nadp_c	1.1.1.365,1.1.1.-	677.795	0		R77	0	galur_c + h_c + nadph_c --> galctn__L_c + nadp_c	1.1.1.365,1.1.1.-	677.795	0		R77	0	galur_c + h_c + nadph_c --> galctn__L_c + nadp_c	1.1.1.365,1.1.1.-	677.795	0		R77
R78_num1	0	CPD_654_c + h2o_c + nadp_c --> akg_c + 2.0 h_c + nadph_c	1.2.1.26	1537.46	0		R78_num1	0	CPD_654_c + h2o_c + nadp_c --> akg_c + 2.0 h_c + nadph_c	1.2.1.26	1537.46	0		R78_num1	0	CPD_654_c + h2o_c + nadp_c --> akg_c + 2.0 h_c + nadph_c	1.2.1.26	1537.46	0		R78_num1	0	CPD_654_c + h2o_c + nadp_c --> akg_c + 2.0 h_c + nadph_c	1.2.1.26	1537.46	0		R78_num1	0	CPD_654_c + h2o_c + nadp_c --> akg_c + 2.0 h_c + nadph_c	1.2.1.26	1537.46	0		R78_num1	0	CPD_654_c + h2o_c + nadp_c --> akg_c + 2.0 h_c + nadph_c	1.2.1.26	1537.46	0		R78_num1	0	CPD_654_c + h2o_c + nadp_c --> akg_c + 2.0 h_c + nadph_c	1.2.1.26	1537.46	0		R78_num1
R79_num1	0	arab__L_c + h_c + nadph_c --> abt_c + nadp_c	1.1.1.21	696.024	0		R79_num1	0	arab__L_c + h_c + nadph_c --> abt_c + nadp_c	1.1.1.21	696.024	0		R79_num1	0	arab__L_c + h_c + nadph_c --> abt_c + nadp_c	1.1.1.21	696.024	0		R79_num1	0	arab__L_c + h_c + nadph_c --> abt_c + nadp_c	1.1.1.21	696.024	0		R79_num1	0	arab__L_c + h_c + nadph_c --> abt_c + nadp_c	1.1.1.21	696.024	0		R79_num1	0	arab__L_c + h_c + nadph_c --> abt_c + nadp_c	1.1.1.21	696.024	0		R79_num1	0	arab__L_c + h_c + nadph_c --> abt_c + nadp_c	1.1.1.21	696.024	0		R79_num1
R80_num1	0	abt_c + nad_c --> h_c + nadh_c + xylu__L_c	1.1.1.12	13422.9	0		R80_num1	0	abt_c + nad_c --> h_c + nadh_c + xylu__L_c	1.1.1.12	13422.9	0		R80_num1	0	abt_c + nad_c --> h_c + nadh_c + xylu__L_c	1.1.1.12	13422.9	0		R80_num1	0	abt_c + nad_c --> h_c + nadh_c + xylu__L_c	1.1.1.12	13422.9	0		R80_num1	0	abt_c + nad_c --> h_c + nadh_c + xylu__L_c	1.1.1.12	13422.9	0		R80_num1	0	abt_c + nad_c --> h_c + nadh_c + xylu__L_c	1.1.1.12	13422.9	0		R80_num1	0	abt_c + nad_c --> h_c + nadh_c + xylu__L_c	1.1.1.12	13422.9	0		R80_num1
R81_num1	0	h_c + nadph_c + xylu__L_c --> nadp_c + xylt_c	1.1.1.10	264.589	0		R81_num1	0	h_c + nadph_c + xylu__L_c --> nadp_c + xylt_c	1.1.1.10	264.589	0		R81_num1	0	h_c + nadph_c + xylu__L_c --> nadp_c + xylt_c	1.1.1.10	264.589	0		R81_num1	0	h_c + nadph_c + xylu__L_c --> nadp_c + xylt_c	1.1.1.10	264.589	0		R81_num1	0	h_c + nadph_c + xylu__L_c --> nadp_c + xylt_c	1.1.1.10	264.589	0		R81_num1	0	h_c + nadph_c + xylu__L_c --> nadp_c + xylt_c	1.1.1.10	264.589	0		R81_num1	0	h_c + nadph_c + xylu__L_c --> nadp_c + xylt_c	1.1.1.10	264.589	0		R81_num1
R82_num1	0	h_c + nadph_c + xyl__D_c --> nadp_c + xylt_c	1.1.1.21,1.1.1.307	636.559	0		R82_num1	0	h_c + nadph_c + xyl__D_c --> nadp_c + xylt_c	1.1.1.21,1.1.1.307	636.559	0		R82_num1	0	h_c + nadph_c + xyl__D_c --> nadp_c + xylt_c	1.1.1.21,1.1.1.307	636.559	0		R82_num1	0	h_c + nadph_c + xyl__D_c --> nadp_c + xylt_c	1.1.1.21,1.1.1.307	636.559	0		R82_num1	0	h_c + nadph_c + xyl__D_c --> nadp_c + xylt_c	1.1.1.21,1.1.1.307	636.559	0		R82_num1	0	h_c + nadph_c + xyl__D_c --> nadp_c + xylt_c	1.1.1.21,1.1.1.307	636.559	0		R82_num1	0	h_c + nadph_c + xyl__D_c --> nadp_c + xylt_c	1.1.1.21,1.1.1.307	636.559	0		R82_num1
R83_num1	0	nadp_c + xylt_c --> h_c + nadph_c + xylu__D_c	1.1.1.10	323.774	0		R83_num1	0	nadp_c + xylt_c --> h_c + nadph_c + xylu__D_c	1.1.1.10	323.774	0		R83_num1	0	nadp_c + xylt_c --> h_c + nadph_c + xylu__D_c	1.1.1.10	323.774	0		R83_num1	0	nadp_c + xylt_c --> h_c + nadph_c + xylu__D_c	1.1.1.10	323.774	0		R83_num1	0	nadp_c + xylt_c --> h_c + nadph_c + xylu__D_c	1.1.1.10	323.774	0		R83_num1	0	nadp_c + xylt_c --> h_c + nadph_c + xylu__D_c	1.1.1.10	323.774	0		R83_num1	0	nadp_c + xylt_c --> h_c + nadph_c + xylu__D_c	1.1.1.10	323.774	0		R83_num1
R84_num1	0	nad_c + xylt_c --> h_c + nadh_c + xylu__D_c	1.1.1.9,1.1.1.14	655.219	0		R84_num1	0	nad_c + xylt_c --> h_c + nadh_c + xylu__D_c	1.1.1.9,1.1.1.14	655.219	0		R84_num1	0	nad_c + xylt_c --> h_c + nadh_c + xylu__D_c	1.1.1.9,1.1.1.14	655.219	0		R84_num1	0	nad_c + xylt_c --> h_c + nadh_c + xylu__D_c	1.1.1.9,1.1.1.14	655.219	0		R84_num1	0	nad_c + xylt_c --> h_c + nadh_c + xylu__D_c	1.1.1.9,1.1.1.14	655.219	0		R84_num1	0	nad_c + xylt_c --> h_c + nadh_c + xylu__D_c	1.1.1.9,1.1.1.14	655.219	0		R84_num1	0	nad_c + xylt_c --> h_c + nadh_c + xylu__D_c	1.1.1.9,1.1.1.14	655.219	0		R84_num1
R85	0	atp_c + xylu__D_c --> adp_c + h_c + xu5p__D_c	2.7.1.17	2181.66	0		R85	0	atp_c + xylu__D_c --> adp_c + h_c + xu5p__D_c	2.7.1.17	2181.66	0		R85	0	atp_c + xylu__D_c --> adp_c + h_c + xu5p__D_c	2.7.1.17	2181.66	0		R85	0	atp_c + xylu__D_c --> adp_c + h_c + xu5p__D_c	2.7.1.17	2181.66	0		R85	0	atp_c + xylu__D_c --> adp_c + h_c + xu5p__D_c	2.7.1.17	2181.66	0		R85	0	atp_c + xylu__D_c --> adp_c + h_c + xu5p__D_c	2.7.1.17	2181.66	0		R85	0	atp_c + xylu__D_c --> adp_c + h_c + xu5p__D_c	2.7.1.17	2181.66	0		R85
R86	0	nad_c + rbt_c --> h_c + nadh_c + rbl__D_c	1.1.1.56	684.514	0		R86	0	nad_c + rbt_c --> h_c + nadh_c + rbl__D_c	1.1.1.56	684.514	0		R86	0	nad_c + rbt_c --> h_c + nadh_c + rbl__D_c	1.1.1.56	684.514	0		R86	0	nad_c + rbt_c --> h_c + nadh_c + rbl__D_c	1.1.1.56	684.514	0		R86	0	nad_c + rbt_c --> h_c + nadh_c + rbl__D_c	1.1.1.56	684.514	0		R86	0	nad_c + rbt_c --> h_c + nadh_c + rbl__D_c	1.1.1.56	684.514	0		R86	0	nad_c + rbt_c --> h_c + nadh_c + rbl__D_c	1.1.1.56	684.514	0		R86
R87	0	nadp_c + rbt_c --> h_c + nadph_c + rbl__D_c	1.1.1.56	577.195	0		R87	0	nadp_c + rbt_c --> h_c + nadph_c + rbl__D_c	1.1.1.56	577.195	0		R87	-1.00565e-18	nadp_c + rbt_c --> h_c + nadph_c + rbl__D_c	1.1.1.56	577.195	-1.7423e-21		R87	0	nadp_c + rbt_c --> h_c + nadph_c + rbl__D_c	1.1.1.56	577.195	0		R87	0	nadp_c + rbt_c --> h_c + nadph_c + rbl__D_c	1.1.1.56	577.195	0		R87	0	nadp_c + rbt_c --> h_c + nadph_c + rbl__D_c	1.1.1.56	577.195	0		R87	0	nadp_c + rbt_c --> h_c + nadph_c + rbl__D_c	1.1.1.56	577.195	0		R87
R88	0	atp_c + rbl__D_c --> adp_c + h_c + ru5p__D_c	2.7.1.16,2.7.1.47	709.819	0		R88	0	atp_c + rbl__D_c --> adp_c + h_c + ru5p__D_c	2.7.1.16,2.7.1.47	709.819	0		R88	0	atp_c + rbl__D_c --> adp_c + h_c + ru5p__D_c	2.7.1.16,2.7.1.47	709.819	0		R88	0	atp_c + rbl__D_c --> adp_c + h_c + ru5p__D_c	2.7.1.16,2.7.1.47	709.819	0		R88	0	atp_c + rbl__D_c --> adp_c + h_c + ru5p__D_c	2.7.1.16,2.7.1.47	709.819	0		R88	0	atp_c + rbl__D_c --> adp_c + h_c + ru5p__D_c	2.7.1.16,2.7.1.47	709.819	0		R88	0	atp_c + rbl__D_c --> adp_c + h_c + ru5p__D_c	2.7.1.16,2.7.1.47	709.819	0		R88
R89_num1	0	PECTIN_e + h2o_e --> PECTATE_e + meoh_e	3.1.1.11	5381.64	0		R89_num1	0	PECTIN_e + h2o_e --> PECTATE_e + meoh_e	3.1.1.11	5381.64	0		R89_num1	0	PECTIN_e + h2o_e --> PECTATE_e + meoh_e	3.1.1.11	5381.64	0		R89_num1	0	PECTIN_e + h2o_e --> PECTATE_e + meoh_e	3.1.1.11	5381.64	0		R89_num1	0	PECTIN_e + h2o_e --> PECTATE_e + meoh_e	3.1.1.11	5381.64	0		R89_num1	0	PECTIN_e + h2o_e --> PECTATE_e + meoh_e	3.1.1.11	5381.64	0		R89_num1	0	PECTIN_e + h2o_e --> PECTATE_e + meoh_e	3.1.1.11	5381.64	0		R89_num1
R90	0	PECTATE_e + h2o_e --> galur_e + h_e		1874.05	0		R90	0	PECTATE_e + h2o_e --> galur_e + h_e		1874.05	0		R90	0	PECTATE_e + h2o_e --> galur_e + h_e		1874.05	0		R90	0	PECTATE_e + h2o_e --> galur_e + h_e		1874.05	0		R90	0	PECTATE_e + h2o_e --> galur_e + h_e		1874.05	0		R90	0	PECTATE_e + h2o_e --> galur_e + h_e		1874.05	0		R90	0	PECTATE_e + h2o_e --> galur_e + h_e		1874.05	0		R90
R91	0	PECTATE_e + h2o_e --> DIGALUR_e + 2.0 h_e		1874.05	0		R91	0	PECTATE_e + h2o_e --> DIGALUR_e + 2.0 h_e		1874.05	0		R91	0	PECTATE_e + h2o_e --> DIGALUR_e + 2.0 h_e		1874.05	0		R91	0	PECTATE_e + h2o_e --> DIGALUR_e + 2.0 h_e		1874.05	0		R91	0	PECTATE_e + h2o_e --> DIGALUR_e + 2.0 h_e		1874.05	0		R91	0	PECTATE_e + h2o_e --> DIGALUR_e + 2.0 h_e		1874.05	0		R91	0	PECTATE_e + h2o_e --> DIGALUR_e + 2.0 h_e		1874.05	0		R91
R92	0	DIGALUR_e + h2o_e --> 2.0 galur_e	3.2.1.67	1874.05	0		R92	0	DIGALUR_e + h2o_e --> 2.0 galur_e	3.2.1.67	1874.05	0		R92	0	DIGALUR_e + h2o_e --> 2.0 galur_e	3.2.1.67	1874.05	0		R92	0	DIGALUR_e + h2o_e --> 2.0 galur_e	3.2.1.67	1874.05	0		R92	0	DIGALUR_e + h2o_e --> 2.0 galur_e	3.2.1.67	1874.05	0		R92	0	DIGALUR_e + h2o_e --> 2.0 galur_e	3.2.1.67	1874.05	0		R92	0	DIGALUR_e + h2o_e --> 2.0 galur_e	3.2.1.67	1874.05	0		R92
R93	0	galur_c + h_c + nadh_c --> galctn__L_c + nad_c	1.1.1.-				R93	0	galur_c + h_c + nadh_c --> galctn__L_c + nad_c	1.1.1.-				R93	0	galur_c + h_c + nadh_c --> galctn__L_c + nad_c	1.1.1.-				R93	0	galur_c + h_c + nadh_c --> galctn__L_c + nad_c	1.1.1.-				R93	0	galur_c + h_c + nadh_c --> galctn__L_c + nad_c	1.1.1.-				R93	0	galur_c + h_c + nadh_c --> galctn__L_c + nad_c	1.1.1.-				R93	0	galur_c + h_c + nadh_c --> galctn__L_c + nad_c	1.1.1.-				R93
R94_num1	0	galctn__L_c --> 2DH3DGAL_c + h2o_c	4.2.1.146				R94_num1	0	galctn__L_c --> 2DH3DGAL_c + h2o_c	4.2.1.146				R94_num1	0	galctn__L_c --> 2DH3DGAL_c + h2o_c	4.2.1.146				R94_num1	0	galctn__L_c --> 2DH3DGAL_c + h2o_c	4.2.1.146				R94_num1	0	galctn__L_c --> 2DH3DGAL_c + h2o_c	4.2.1.146				R94_num1	0	galctn__L_c --> 2DH3DGAL_c + h2o_c	4.2.1.146				R94_num1	0	galctn__L_c --> 2DH3DGAL_c + h2o_c	4.2.1.146				R94_num1
R95_num1	0	2DH3DGAL_c --> Lglyald_c + pyr_c	4.1.2.54	949.168	0		R95_num1	0	2DH3DGAL_c --> Lglyald_c + pyr_c	4.1.2.54	949.168	0		R95_num1	0	2DH3DGAL_c --> Lglyald_c + pyr_c	4.1.2.54	949.168	0		R95_num1	0	2DH3DGAL_c --> Lglyald_c + pyr_c	4.1.2.54	949.168	0		R95_num1	0	2DH3DGAL_c --> Lglyald_c + pyr_c	4.1.2.54	949.168	0		R95_num1	0	2DH3DGAL_c --> Lglyald_c + pyr_c	4.1.2.54	949.168	0		R95_num1	0	2DH3DGAL_c --> Lglyald_c + pyr_c	4.1.2.54	949.168	0		R95_num1
R96	0	Lglyald_c + h_c + nadph_c --> glyc_c + nadp_c	1.1.1.372	1096.35	0		R96	0	Lglyald_c + h_c + nadph_c --> glyc_c + nadp_c	1.1.1.372	1096.35	0		R96	0	Lglyald_c + h_c + nadph_c --> glyc_c + nadp_c	1.1.1.372	1096.35	0		R96	0	Lglyald_c + h_c + nadph_c --> glyc_c + nadp_c	1.1.1.372	1096.35	0		R96	3.28319e-31	Lglyald_c + h_c + nadph_c --> glyc_c + nadp_c	1.1.1.372	1096.35	2.99466e-34		R96	0	Lglyald_c + h_c + nadph_c --> glyc_c + nadp_c	1.1.1.372	1096.35	0		R96	0	Lglyald_c + h_c + nadph_c --> glyc_c + nadp_c	1.1.1.372	1096.35	0		R96
R97_num1	0	abt__D_c + nad_c --> h_c + nadh_c + rbl__D_c	1.1.1.250	5450.39	0		R97_num1	0	abt__D_c + nad_c --> h_c + nadh_c + rbl__D_c	1.1.1.250	5450.39	0		R97_num1	0	abt__D_c + nad_c --> h_c + nadh_c + rbl__D_c	1.1.1.250	5450.39	0		R97_num1	0	abt__D_c + nad_c --> h_c + nadh_c + rbl__D_c	1.1.1.250	5450.39	0		R97_num1	0	abt__D_c + nad_c --> h_c + nadh_c + rbl__D_c	1.1.1.250	5450.39	0		R97_num1	0	abt__D_c + nad_c --> h_c + nadh_c + rbl__D_c	1.1.1.250	5450.39	0		R97_num1	0	abt__D_c + nad_c --> h_c + nadh_c + rbl__D_c	1.1.1.250	5450.39	0		R97_num1
R98_num1	0	3.0 h_c + 2.0 nadh_c + udpgalur_c --> h2o_c + 2.0 nad_c + udpgal_c		432.284	0		R98_num1	0	3.0 h_c + 2.0 nadh_c + udpgalur_c --> h2o_c + 2.0 nad_c + udpgal_c		432.284	0		R98_num1	0	3.0 h_c + 2.0 nadh_c + udpgalur_c --> h2o_c + 2.0 nad_c + udpgal_c		432.284	0		R98_num1	0	3.0 h_c + 2.0 nadh_c + udpgalur_c --> h2o_c + 2.0 nad_c + udpgal_c		432.284	0		R98_num1	0	3.0 h_c + 2.0 nadh_c + udpgalur_c --> h2o_c + 2.0 nad_c + udpgal_c		432.284	0		R98_num1	0	3.0 h_c + 2.0 nadh_c + udpgalur_c --> h2o_c + 2.0 nad_c + udpgal_c		432.284	0		R98_num1	0	3.0 h_c + 2.0 nadh_c + udpgalur_c --> h2o_c + 2.0 nad_c + udpgal_c		432.284	0		R98_num1
R99_num1	0	abt_c + nad_c --> arab__L_c + h_c + nadh_c	1.1.1.21	675.018	0		R99_num1	0	abt_c + nad_c --> arab__L_c + h_c + nadh_c	1.1.1.21	675.018	0		R99_num1	0	abt_c + nad_c --> arab__L_c + h_c + nadh_c	1.1.1.21	675.018	0		R99_num1	0	abt_c + nad_c --> arab__L_c + h_c + nadh_c	1.1.1.21	675.018	0		R99_num1	0	abt_c + nad_c --> arab__L_c + h_c + nadh_c	1.1.1.21	675.018	0		R99_num1	0	abt_c + nad_c --> arab__L_c + h_c + nadh_c	1.1.1.21	675.018	0		R99_num1	0	abt_c + nad_c --> arab__L_c + h_c + nadh_c	1.1.1.21	675.018	0		R99_num1
R101_num1	0	2ddglcn_m + nad_m --> CPD_343_m + h_m + nadh_m	1.1.1.127	6203.39	0		R101_num1	0	2ddglcn_m + nad_m --> CPD_343_m + h_m + nadh_m	1.1.1.127	6203.39	0		R101_num1	0	2ddglcn_m + nad_m --> CPD_343_m + h_m + nadh_m	1.1.1.127	6203.39	0		R101_num1	0	2ddglcn_m + nad_m --> CPD_343_m + h_m + nadh_m	1.1.1.127	6203.39	0		R101_num1	0	2ddglcn_m + nad_m --> CPD_343_m + h_m + nadh_m	1.1.1.127	6203.39	0		R101_num1	0	2ddglcn_m + nad_m --> CPD_343_m + h_m + nadh_m	1.1.1.127	6203.39	0		R101_num1	0	2ddglcn_m + nad_m --> CPD_343_m + h_m + nadh_m	1.1.1.127	6203.39	0		R101_num1
R102	0	h2o_c + xylnact__D_c --> D_XYLONATE_c + h_c		2415.8	0		R102	0	h2o_c + xylnact__D_c --> D_XYLONATE_c + h_c		2415.8	0		R102	0	h2o_c + xylnact__D_c --> D_XYLONATE_c + h_c		2415.8	0		R102	0	h2o_c + xylnact__D_c --> D_XYLONATE_c + h_c		2415.8	0		R102	0	h2o_c + xylnact__D_c --> D_XYLONATE_c + h_c		2415.8	0		R102	0	h2o_c + xylnact__D_c --> D_XYLONATE_c + h_c		2415.8	0		R102	0	h2o_c + xylnact__D_c --> D_XYLONATE_c + h_c		2415.8	0		R102
R103	0	D_XYLOPYRANOSE_c + nadp_c --> h_c + nadph_c + xylnact__D_c	1.1.1.179	779.215	0		R103	0	D_XYLOPYRANOSE_c + nadp_c --> h_c + nadph_c + xylnact__D_c	1.1.1.179	779.215	0		R103	0	D_XYLOPYRANOSE_c + nadp_c --> h_c + nadph_c + xylnact__D_c	1.1.1.179	779.215	0		R103	0	D_XYLOPYRANOSE_c + nadp_c --> h_c + nadph_c + xylnact__D_c	1.1.1.179	779.215	0		R103	0	D_XYLOPYRANOSE_c + nadp_c --> h_c + nadph_c + xylnact__D_c	1.1.1.179	779.215	0		R103	0	D_XYLOPYRANOSE_c + nadp_c --> h_c + nadph_c + xylnact__D_c	1.1.1.179	779.215	0		R103	0	D_XYLOPYRANOSE_c + nadp_c --> h_c + nadph_c + xylnact__D_c	1.1.1.179	779.215	0		R103
R104	3.18178	mal__L_m + nad_m --> h_m + nadh_m + oaa_m	1.1.1.37,1.1.1.299	6.21185e+06	5.12211e-07		R104	5.67549	mal__L_m + nad_m --> h_m + nadh_m + oaa_m	1.1.1.37,1.1.1.299	6.21185e+06	9.13655e-07		R104	1	mal__L_m + nad_m --> h_m + nadh_m + oaa_m	1.1.1.37,1.1.1.299	6.21185e+06	1.60983e-07		R104	0.739688	mal__L_m + nad_m --> h_m + nadh_m + oaa_m	1.1.1.37,1.1.1.299	6.21185e+06	1.19077e-07		R104	0.607096	mal__L_m + nad_m --> h_m + nadh_m + oaa_m	1.1.1.37,1.1.1.299	6.21185e+06	9.77318e-08		R104	0.868588	mal__L_m + nad_m --> h_m + nadh_m + oaa_m	1.1.1.37,1.1.1.299	6.21185e+06	1.39828e-07		R104	0.607096	mal__L_m + nad_m --> h_m + nadh_m + oaa_m	1.1.1.37,1.1.1.299	6.21185e+06	9.77318e-08		R104
R105	0	mal__L_c + nad_c --> h_c + nadh_c + oaa_c	1.1.1.37,1.1.1.299	990.209	0		R105	0	mal__L_c + nad_c --> h_c + nadh_c + oaa_c	1.1.1.37,1.1.1.299	990.209	0		R105	0	mal__L_c + nad_c --> h_c + nadh_c + oaa_c	1.1.1.37,1.1.1.299	990.209	0		R105	0	mal__L_c + nad_c --> h_c + nadh_c + oaa_c	1.1.1.37,1.1.1.299	990.209	0		R105	0	mal__L_c + nad_c --> h_c + nadh_c + oaa_c	1.1.1.37,1.1.1.299	990.209	0		R105	0	mal__L_c + nad_c --> h_c + nadh_c + oaa_c	1.1.1.37,1.1.1.299	990.209	0		R105	0	mal__L_c + nad_c --> h_c + nadh_c + oaa_c	1.1.1.37,1.1.1.299	990.209	0		R105
R106	0	mal__L_x + nad_x --> h_x + nadh_x + oaa_x	1.1.1.37	39654.4	0		R106	0	mal__L_x + nad_x --> h_x + nadh_x + oaa_x	1.1.1.37	39654.4	0		R106	0	mal__L_x + nad_x --> h_x + nadh_x + oaa_x	1.1.1.37	39654.4	0		R106	0	mal__L_x + nad_x --> h_x + nadh_x + oaa_x	1.1.1.37	39654.4	0		R106	-1.69567e-31	mal__L_x + nad_x --> h_x + nadh_x + oaa_x	1.1.1.37	39654.4	-4.27611e-36		R106	0	mal__L_x + nad_x --> h_x + nadh_x + oaa_x	1.1.1.37	39654.4	0		R106	0	mal__L_x + nad_x --> h_x + nadh_x + oaa_x	1.1.1.37	39654.4	0		R106
R107	0	atp_c + co2_c + h2o_c + pyr_c --> adp_c + 2.0 h_c + oaa_c + pi_c	6.4.1.1	493.872	0		R107	0.38998	atp_c + co2_c + h2o_c + pyr_c --> adp_c + 2.0 h_c + oaa_c + pi_c	6.4.1.1	493.872	0.000789639		R107	3	atp_c + co2_c + h2o_c + pyr_c --> adp_c + 2.0 h_c + oaa_c + pi_c	6.4.1.1	493.872	0.00607445		R107	0	atp_c + co2_c + h2o_c + pyr_c --> adp_c + 2.0 h_c + oaa_c + pi_c	6.4.1.1	493.872	0		R107	0	atp_c + co2_c + h2o_c + pyr_c --> adp_c + 2.0 h_c + oaa_c + pi_c	6.4.1.1	493.872	0		R107	0	atp_c + co2_c + h2o_c + pyr_c --> adp_c + 2.0 h_c + oaa_c + pi_c	6.4.1.1	493.872	0		R107	0	atp_c + co2_c + h2o_c + pyr_c --> adp_c + 2.0 h_c + oaa_c + pi_c	6.4.1.1	493.872	0		R107
R108	-1.09909e-15	atp_m + co2_m + h2o_m + pyr_m --> adp_m + 2.0 h_m + oaa_m + pi_m	6.4.1.1	2664.25	-4.12532e-19		R108	0.0905208	atp_m + co2_m + h2o_m + pyr_m --> adp_m + 2.0 h_m + oaa_m + pi_m	6.4.1.1	2664.25	3.39761e-05		R108	2	atp_m + co2_m + h2o_m + pyr_m --> adp_m + 2.0 h_m + oaa_m + pi_m	6.4.1.1	2664.25	0.00075068		R108	0	atp_m + co2_m + h2o_m + pyr_m --> adp_m + 2.0 h_m + oaa_m + pi_m	6.4.1.1	2664.25	0		R108	0	atp_m + co2_m + h2o_m + pyr_m --> adp_m + 2.0 h_m + oaa_m + pi_m	6.4.1.1	2664.25	0		R108	0	atp_m + co2_m + h2o_m + pyr_m --> adp_m + 2.0 h_m + oaa_m + pi_m	6.4.1.1	2664.25	0		R108	0	atp_m + co2_m + h2o_m + pyr_m --> adp_m + 2.0 h_m + oaa_m + pi_m	6.4.1.1	2664.25	0		R108
R109	0	fum_m + h2o_m --> mal__L_m	4.2.1.2	4862.1	0		R109	1.83148	fum_m + h2o_m --> mal__L_m	4.2.1.2	4862.1	0.000376686		R109	6.66134e-16	fum_m + h2o_m --> mal__L_m	4.2.1.2	4862.1	1.37005e-19		R109	0.369844	fum_m + h2o_m --> mal__L_m	4.2.1.2	4862.1	7.60667e-05		R109	0.303548	fum_m + h2o_m --> mal__L_m	4.2.1.2	4862.1	6.24315e-05		R109	0.434294	fum_m + h2o_m --> mal__L_m	4.2.1.2	4862.1	8.93224e-05		R109	0.303548	fum_m + h2o_m --> mal__L_m	4.2.1.2	4862.1	6.24315e-05		R109
R110	0	mal__L_c --> fum_c + h2o_c	4.2.1.2	347.008	0		R110	0	mal__L_c --> fum_c + h2o_c	4.2.1.2	347.008	0		R110	0	mal__L_c --> fum_c + h2o_c	4.2.1.2	347.008	0		R110	0	mal__L_c --> fum_c + h2o_c	4.2.1.2	347.008	0		R110	0	mal__L_c --> fum_c + h2o_c	4.2.1.2	347.008	0		R110	0	mal__L_c --> fum_c + h2o_c	4.2.1.2	347.008	0		R110	0	mal__L_c --> fum_c + h2o_c	4.2.1.2	347.008	0		R110
R111	7.30621e-16	q_m + succ_m --> fum_m + qh2_m	1.3.5.1	25354.3	2.88164e-20		R111	0.870481	q_m + succ_m --> fum_m + qh2_m	1.3.5.1	25354.3	3.43326e-05		R111	0	q_m + succ_m --> fum_m + qh2_m	1.3.5.1	25354.3	0		R111	0.369844	q_m + succ_m --> fum_m + qh2_m	1.3.5.1	25354.3	1.4587e-05		R111	0.303548	q_m + succ_m --> fum_m + qh2_m	1.3.5.1	25354.3	1.19722e-05		R111	0.434294	q_m + succ_m --> fum_m + qh2_m	1.3.5.1	25354.3	1.7129e-05		R111	0.303548	q_m + succ_m --> fum_m + qh2_m	1.3.5.1	25354.3	1.19722e-05		R111
R112	7.30621e-16	adp_m + pi_m + succoa_m --> atp_m + coa_m + succ_m	6.2.1.5	411.293	1.7764e-18		R112	-2.94209e-15	adp_m + pi_m + succoa_m --> atp_m + coa_m + succ_m	6.2.1.5	411.293	-7.15327e-18		R112	0	adp_m + pi_m + succoa_m --> atp_m + coa_m + succ_m	6.2.1.5	411.293	0		R112	0.369844	adp_m + pi_m + succoa_m --> atp_m + coa_m + succ_m	6.2.1.5	411.293	0.000899222		R112	0.303548	adp_m + pi_m + succoa_m --> atp_m + coa_m + succ_m	6.2.1.5	411.293	0.000738033		R112	0.434294	adp_m + pi_m + succoa_m --> atp_m + coa_m + succ_m	6.2.1.5	411.293	0.00105592		R112	0.303548	adp_m + pi_m + succoa_m --> atp_m + coa_m + succ_m	6.2.1.5	411.293	0.000738033		R112
R113	0	gdp_m + pi_m + succoa_m --> coa_m + gtp_m + succ_m	6.2.1.4	411.293	0		R113	0	gdp_m + pi_m + succoa_m --> coa_m + gtp_m + succ_m	6.2.1.4	411.293	0		R113	0	gdp_m + pi_m + succoa_m --> coa_m + gtp_m + succ_m	6.2.1.4	411.293	0		R113	0	gdp_m + pi_m + succoa_m --> coa_m + gtp_m + succ_m	6.2.1.4	411.293	0		R113	0	gdp_m + pi_m + succoa_m --> coa_m + gtp_m + succ_m	6.2.1.4	411.293	0		R113	2.46519e-32	gdp_m + pi_m + succoa_m --> coa_m + gtp_m + succ_m	6.2.1.4	411.293	5.99375e-35		R113	0	gdp_m + pi_m + succoa_m --> coa_m + gtp_m + succ_m	6.2.1.4	411.293	0		R113
R114_num1	0	accoa_m + h2o_m + oaa_m --> cit_m + coa_m + h_m	2.3.3.1,2.3.3.3,2.3.3.16	1951.84	0		R114_num1	0	accoa_m + h2o_m + oaa_m --> cit_m + coa_m + h_m	2.3.3.1,2.3.3.3,2.3.3.16	1951.84	0		R114_num1	0	accoa_m + h2o_m + oaa_m --> cit_m + coa_m + h_m	2.3.3.1,2.3.3.3,2.3.3.16	1951.84	0		R114_num1	0	accoa_m + h2o_m + oaa_m --> cit_m + coa_m + h_m	2.3.3.1,2.3.3.3,2.3.3.16	1951.84	0		R114_num1	0	accoa_m + h2o_m + oaa_m --> cit_m + coa_m + h_m	2.3.3.1,2.3.3.3,2.3.3.16	1951.84	0		R114_num1	0	accoa_m + h2o_m + oaa_m --> cit_m + coa_m + h_m	2.3.3.1,2.3.3.3,2.3.3.16	1951.84	0		R114_num1	0	accoa_m + h2o_m + oaa_m --> cit_m + coa_m + h_m	2.3.3.1,2.3.3.3,2.3.3.16	1951.84	0		R114_num1
R115	0	atp_c + cit_c + coa_c --> accoa_c + adp_c + oaa_c + pi_c	2.3.3.8				R115	0	atp_c + cit_c + coa_c --> accoa_c + adp_c + oaa_c + pi_c	2.3.3.8				R115	0	atp_c + cit_c + coa_c --> accoa_c + adp_c + oaa_c + pi_c	2.3.3.8				R115	0	atp_c + cit_c + coa_c --> accoa_c + adp_c + oaa_c + pi_c	2.3.3.8				R115	0	atp_c + cit_c + coa_c --> accoa_c + adp_c + oaa_c + pi_c	2.3.3.8				R115	0	atp_c + cit_c + coa_c --> accoa_c + adp_c + oaa_c + pi_c	2.3.3.8				R115	0	atp_c + cit_c + coa_c --> accoa_c + adp_c + oaa_c + pi_c	2.3.3.8				R115
R116	0	atp_m + cit_m + coa_m --> accoa_m + adp_m + oaa_m + pi_m	2.3.3.8				R116	0	atp_m + cit_m + coa_m --> accoa_m + adp_m + oaa_m + pi_m	2.3.3.8				R116	0	atp_m + cit_m + coa_m --> accoa_m + adp_m + oaa_m + pi_m	2.3.3.8				R116	0	atp_m + cit_m + coa_m --> accoa_m + adp_m + oaa_m + pi_m	2.3.3.8				R116	0	atp_m + cit_m + coa_m --> accoa_m + adp_m + oaa_m + pi_m	2.3.3.8				R116	0	atp_m + cit_m + coa_m --> accoa_m + adp_m + oaa_m + pi_m	2.3.3.8				R116	0	atp_m + cit_m + coa_m --> accoa_m + adp_m + oaa_m + pi_m	2.3.3.8				R116
R117_num1	0	icit_m + nad_m --> akg_m + co2_m + nadh_m	1.1.1.41,1.1.1.286	3709.1	0		R117_num1	0	icit_m + nad_m --> akg_m + co2_m + nadh_m	1.1.1.41,1.1.1.286	3709.1	0		R117_num1	3	icit_m + nad_m --> akg_m + co2_m + nadh_m	1.1.1.41,1.1.1.286	3709.1	0.000808821		R117_num1	0.369844	icit_m + nad_m --> akg_m + co2_m + nadh_m	1.1.1.41,1.1.1.286	3709.1	9.97125e-05		R117_num1	0.303548	icit_m + nad_m --> akg_m + co2_m + nadh_m	1.1.1.41,1.1.1.286	3709.1	8.18386e-05		R117_num1	0.434294	icit_m + nad_m --> akg_m + co2_m + nadh_m	1.1.1.41,1.1.1.286	3709.1	0.000117089		R117_num1	0.303548	icit_m + nad_m --> akg_m + co2_m + nadh_m	1.1.1.41,1.1.1.286	3709.1	8.18386e-05		R117_num1
R118	7.30621e-16	akg_m + coa_m + nad_m --> co2_m + nadh_m + succoa_m	1.2.4.2	780.237	9.36408e-19		R118	-2.94209e-15	akg_m + coa_m + nad_m --> co2_m + nadh_m + succoa_m	1.2.4.2	780.237	-3.77077e-18		R118	0	akg_m + coa_m + nad_m --> co2_m + nadh_m + succoa_m	1.2.4.2	780.237	0		R118	0.369844	akg_m + coa_m + nad_m --> co2_m + nadh_m + succoa_m	1.2.4.2	780.237	0.000474015		R118	0.303548	akg_m + coa_m + nad_m --> co2_m + nadh_m + succoa_m	1.2.4.2	780.237	0.000389046		R118	0.434294	akg_m + coa_m + nad_m --> co2_m + nadh_m + succoa_m	1.2.4.2	780.237	0.000556618		R118	0.303548	akg_m + coa_m + nad_m --> co2_m + nadh_m + succoa_m	1.2.4.2	780.237	0.000389046		R118
R119_num1	0	fum_c + h_c + nadh_c --> nad_c + succ_c	1.3.1.6	1586.79	0		R119_num1	0	fum_c + h_c + nadh_c --> nad_c + succ_c	1.3.1.6	1586.79	0		R119_num1	0	fum_c + h_c + nadh_c --> nad_c + succ_c	1.3.1.6	1586.79	0		R119_num1	0	fum_c + h_c + nadh_c --> nad_c + succ_c	1.3.1.6	1586.79	0		R119_num1	0	fum_c + h_c + nadh_c --> nad_c + succ_c	1.3.1.6	1586.79	0		R119_num1	0	fum_c + h_c + nadh_c --> nad_c + succ_c	1.3.1.6	1586.79	0		R119_num1	0	fum_c + h_c + nadh_c --> nad_c + succ_c	1.3.1.6	1586.79	0		R119_num1
R121	0	akg_m + 2.0 h_m + thmpp_m --> HC01435_m + co2_m	1.2.4.2	134.606	0		R121	0	akg_m + 2.0 h_m + thmpp_m --> HC01435_m + co2_m	1.2.4.2	134.606	0		R121	0	akg_m + 2.0 h_m + thmpp_m --> HC01435_m + co2_m	1.2.4.2	134.606	0		R121	0	akg_m + 2.0 h_m + thmpp_m --> HC01435_m + co2_m	1.2.4.2	134.606	0		R121	0	akg_m + 2.0 h_m + thmpp_m --> HC01435_m + co2_m	1.2.4.2	134.606	0		R121	0	akg_m + 2.0 h_m + thmpp_m --> HC01435_m + co2_m	1.2.4.2	134.606	0		R121	0	akg_m + 2.0 h_m + thmpp_m --> HC01435_m + co2_m	1.2.4.2	134.606	0		R121
R122	0	coa_m + itp_m + succ_m --> idp_m + pi_m + succoa_m		1182.43	0		R122	0	coa_m + itp_m + succ_m --> idp_m + pi_m + succoa_m		1182.43	0		R122	0	coa_m + itp_m + succ_m --> idp_m + pi_m + succoa_m		1182.43	0		R122	0	coa_m + itp_m + succ_m --> idp_m + pi_m + succoa_m		1182.43	0		R122	0	coa_m + itp_m + succ_m --> idp_m + pi_m + succoa_m		1182.43	0		R122	0	coa_m + itp_m + succ_m --> idp_m + pi_m + succoa_m		1182.43	0		R122	0	coa_m + itp_m + succ_m --> idp_m + pi_m + succoa_m		1182.43	0		R122
R124	0	HC01434_m + h_m --> akg_m + co2_m		1360.65	0		R124	0	HC01434_m + h_m --> akg_m + co2_m		1360.65	0		R124	0	HC01434_m + h_m --> akg_m + co2_m		1360.65	0		R124	0	HC01434_m + h_m --> akg_m + co2_m		1360.65	0		R124	0	HC01434_m + h_m --> akg_m + co2_m		1360.65	0		R124	0	HC01434_m + h_m --> akg_m + co2_m		1360.65	0		R124	0	HC01434_m + h_m --> akg_m + co2_m		1360.65	0		R124
R125	0	THREO_DS_ISO_CITRATE_m + nadp_m --> HC01434_m + h_m + nadph_m		1320.74	0		R125	0	THREO_DS_ISO_CITRATE_m + nadp_m --> HC01434_m + h_m + nadph_m		1320.74	0		R125	0	THREO_DS_ISO_CITRATE_m + nadp_m --> HC01434_m + h_m + nadph_m		1320.74	0		R125	0	THREO_DS_ISO_CITRATE_m + nadp_m --> HC01434_m + h_m + nadph_m		1320.74	0		R125	0	THREO_DS_ISO_CITRATE_m + nadp_m --> HC01434_m + h_m + nadph_m		1320.74	0		R125	0	THREO_DS_ISO_CITRATE_m + nadp_m --> HC01434_m + h_m + nadph_m		1320.74	0		R125	0	THREO_DS_ISO_CITRATE_m + nadp_m --> HC01434_m + h_m + nadph_m		1320.74	0		R125
R126	0	C16254_m + coa_m --> C15973_m + succoa_m	2.3.1.61				R126	0	C16254_m + coa_m --> C15973_m + succoa_m	2.3.1.61				R126	0	C16254_m + coa_m --> C15973_m + succoa_m	2.3.1.61				R126	0	C16254_m + coa_m --> C15973_m + succoa_m	2.3.1.61				R126	0	C16254_m + coa_m --> C15973_m + succoa_m	2.3.1.61				R126	0	C16254_m + coa_m --> C15973_m + succoa_m	2.3.1.61				R126	0	C16254_m + coa_m --> C15973_m + succoa_m	2.3.1.61				R126
R127	0	HC01435_m + LIPO_m --> C16254_m + thmpp_m	1.2.4.2	429.807	0		R127	0	HC01435_m + LIPO_m --> C16254_m + thmpp_m	1.2.4.2	429.807	0		R127	0	HC01435_m + LIPO_m --> C16254_m + thmpp_m	1.2.4.2	429.807	0		R127	0	HC01435_m + LIPO_m --> C16254_m + thmpp_m	1.2.4.2	429.807	0		R127	0	HC01435_m + LIPO_m --> C16254_m + thmpp_m	1.2.4.2	429.807	0		R127	0	HC01435_m + LIPO_m --> C16254_m + thmpp_m	1.2.4.2	429.807	0		R127	0	HC01435_m + LIPO_m --> C16254_m + thmpp_m	1.2.4.2	429.807	0		R127
R128	-8.48728e-16	ala__L_c + glx_c --> gly_c + pyr_c	2.6.1.44	1999.38	-4.24495e-19		R128	0.870481	ala__L_c + glx_c --> gly_c + pyr_c	2.6.1.44	1999.38	0.000435375		R128	0	ala__L_c + glx_c --> gly_c + pyr_c	2.6.1.44	1999.38	0		R128	0	ala__L_c + glx_c --> gly_c + pyr_c	2.6.1.44	1999.38	0		R128	-8.17995e-32	ala__L_c + glx_c --> gly_c + pyr_c	2.6.1.44	1999.38	-4.09124e-35		R128	0	ala__L_c + glx_c --> gly_c + pyr_c	2.6.1.44	1999.38	0		R128	0	ala__L_c + glx_c --> gly_c + pyr_c	2.6.1.44	1999.38	0		R128
R129	0	asp__D_c + h2o_c + o2_c --> h2o2_c + nh4_c + oaa_c	1.4.3.15,1.4.3.1	2722.22	0		R129	0	asp__D_c + h2o_c + o2_c --> h2o2_c + nh4_c + oaa_c	1.4.3.15,1.4.3.1	2722.22	0		R129	0	asp__D_c + h2o_c + o2_c --> h2o2_c + nh4_c + oaa_c	1.4.3.15,1.4.3.1	2722.22	0		R129	0	asp__D_c + h2o_c + o2_c --> h2o2_c + nh4_c + oaa_c	1.4.3.15,1.4.3.1	2722.22	0		R129	0	asp__D_c + h2o_c + o2_c --> h2o2_c + nh4_c + oaa_c	1.4.3.15,1.4.3.1	2722.22	0		R129	0	asp__D_c + h2o_c + o2_c --> h2o2_c + nh4_c + oaa_c	1.4.3.15,1.4.3.1	2722.22	0		R129	0	asp__D_c + h2o_c + o2_c --> h2o2_c + nh4_c + oaa_c	1.4.3.15,1.4.3.1	2722.22	0		R129
R130_num1	0	C12270_c + h2o_c --> Nacasp_c + glu__L_c + 3.0 h_c	3.4.17.21	136.253	0		R130_num1	0	C12270_c + h2o_c --> Nacasp_c + glu__L_c + 3.0 h_c	3.4.17.21	136.253	0		R130_num1	0	C12270_c + h2o_c --> Nacasp_c + glu__L_c + 3.0 h_c	3.4.17.21	136.253	0		R130_num1	0	C12270_c + h2o_c --> Nacasp_c + glu__L_c + 3.0 h_c	3.4.17.21	136.253	0		R130_num1	0	C12270_c + h2o_c --> Nacasp_c + glu__L_c + 3.0 h_c	3.4.17.21	136.253	0		R130_num1	0	C12270_c + h2o_c --> Nacasp_c + glu__L_c + 3.0 h_c	3.4.17.21	136.253	0		R130_num1	0	C12270_c + h2o_c --> Nacasp_c + glu__L_c + 3.0 h_c	3.4.17.21	136.253	0		R130_num1
R131_num1	0	C20776_c + h2o_c --> C12270_c + glu__L_c + h_c	3.4.17.21	206.702	0		R131_num1	0	C20776_c + h2o_c --> C12270_c + glu__L_c + h_c	3.4.17.21	206.702	0		R131_num1	0	C20776_c + h2o_c --> C12270_c + glu__L_c + h_c	3.4.17.21	206.702	0		R131_num1	0	C20776_c + h2o_c --> C12270_c + glu__L_c + h_c	3.4.17.21	206.702	0		R131_num1	0	C20776_c + h2o_c --> C12270_c + glu__L_c + h_c	3.4.17.21	206.702	0		R131_num1	0	C20776_c + h2o_c --> C12270_c + glu__L_c + h_c	3.4.17.21	206.702	0		R131_num1	0	C20776_c + h2o_c --> C12270_c + glu__L_c + h_c	3.4.17.21	206.702	0		R131_num1
R132	0	2_OXOSUCCINAMATE_m + h2o_m --> nh4_m + oaa_m		2551.41	0		R132	0	2_OXOSUCCINAMATE_m + h2o_m --> nh4_m + oaa_m		2551.41	0		R132	0	2_OXOSUCCINAMATE_m + h2o_m --> nh4_m + oaa_m		2551.41	0		R132	0	2_OXOSUCCINAMATE_m + h2o_m --> nh4_m + oaa_m		2551.41	0		R132	0	2_OXOSUCCINAMATE_m + h2o_m --> nh4_m + oaa_m		2551.41	0		R132	0	2_OXOSUCCINAMATE_m + h2o_m --> nh4_m + oaa_m		2551.41	0		R132	0	2_OXOSUCCINAMATE_m + h2o_m --> nh4_m + oaa_m		2551.41	0		R132
R133_num1	0	HC00591_m + h2o_m --> akg_m + nh4_m	3.5.1.111	2476.58	0		R133_num1	0	HC00591_m + h2o_m --> akg_m + nh4_m	3.5.1.111	2476.58	0		R133_num1	0	HC00591_m + h2o_m --> akg_m + nh4_m	3.5.1.111	2476.58	0		R133_num1	0	HC00591_m + h2o_m --> akg_m + nh4_m	3.5.1.111	2476.58	0		R133_num1	0	HC00591_m + h2o_m --> akg_m + nh4_m	3.5.1.111	2476.58	0		R133_num1	0	HC00591_m + h2o_m --> akg_m + nh4_m	3.5.1.111	2476.58	0		R133_num1	0	HC00591_m + h2o_m --> akg_m + nh4_m	3.5.1.111	2476.58	0		R133_num1
R134_num1	0	f6p_c + gln__L_c --> gam6p_c + glu__L_c	2.6.1.16	700.238	0		R134_num1	0	f6p_c + gln__L_c --> gam6p_c + glu__L_c	2.6.1.16	700.238	0		R134_num1	-1.23608e-17	f6p_c + gln__L_c --> gam6p_c + glu__L_c	2.6.1.16	700.238	-1.76522e-20		R134_num1	0	f6p_c + gln__L_c --> gam6p_c + glu__L_c	2.6.1.16	700.238	0		R134_num1	0	f6p_c + gln__L_c --> gam6p_c + glu__L_c	2.6.1.16	700.238	0		R134_num1	0	f6p_c + gln__L_c --> gam6p_c + glu__L_c	2.6.1.16	700.238	0		R134_num1	0	f6p_c + gln__L_c --> gam6p_c + glu__L_c	2.6.1.16	700.238	0		R134_num1
R135	0	1pyr5c_m + 2.0 h2o_m + nad_m --> glu__L_m + h_m + nadh_m	1.2.1.88	329.051	0		R135	0	1pyr5c_m + 2.0 h2o_m + nad_m --> glu__L_m + h_m + nadh_m	1.2.1.88	329.051	0		R135	1.03812e-17	1pyr5c_m + 2.0 h2o_m + nad_m --> glu__L_m + h_m + nadh_m	1.2.1.88	329.051	3.1549e-20		R135	5.10129e-15	1pyr5c_m + 2.0 h2o_m + nad_m --> glu__L_m + h_m + nadh_m	1.2.1.88	329.051	1.5503e-17		R135	0	1pyr5c_m + 2.0 h2o_m + nad_m --> glu__L_m + h_m + nadh_m	1.2.1.88	329.051	0		R135	0	1pyr5c_m + 2.0 h2o_m + nad_m --> glu__L_m + h_m + nadh_m	1.2.1.88	329.051	0		R135	0	1pyr5c_m + 2.0 h2o_m + nad_m --> glu__L_m + h_m + nadh_m	1.2.1.88	329.051	0		R135
R136	0	1pyr5c_c + 2.0 h2o_c + nad_c --> glu__L_c + h_c + nadh_c	1.2.1.88	329.051	0		R136	0	1pyr5c_c + 2.0 h2o_c + nad_c --> glu__L_c + h_c + nadh_c	1.2.1.88	329.051	0		R136	0	1pyr5c_c + 2.0 h2o_c + nad_c --> glu__L_c + h_c + nadh_c	1.2.1.88	329.051	0		R136	0	1pyr5c_c + 2.0 h2o_c + nad_c --> glu__L_c + h_c + nadh_c	1.2.1.88	329.051	0		R136	0	1pyr5c_c + 2.0 h2o_c + nad_c --> glu__L_c + h_c + nadh_c	1.2.1.88	329.051	0		R136	0	1pyr5c_c + 2.0 h2o_c + nad_c --> glu__L_c + h_c + nadh_c	1.2.1.88	329.051	0		R136	0	1pyr5c_c + 2.0 h2o_c + nad_c --> glu__L_c + h_c + nadh_c	1.2.1.88	329.051	0		R136
R137	-4.52781e-17	1pyr5c_c + 2.0 h2o_c + nadp_c --> glu__L_c + h_c + nadph_c	1.2.1.88	283.544	-1.59686e-19		R137	0	1pyr5c_c + 2.0 h2o_c + nadp_c --> glu__L_c + h_c + nadph_c	1.2.1.88	283.544	0		R137	-2.47966e-17	1pyr5c_c + 2.0 h2o_c + nadp_c --> glu__L_c + h_c + nadph_c	1.2.1.88	283.544	-8.74522e-20		R137	0	1pyr5c_c + 2.0 h2o_c + nadp_c --> glu__L_c + h_c + nadph_c	1.2.1.88	283.544	0		R137	-1.2326e-32	1pyr5c_c + 2.0 h2o_c + nadp_c --> glu__L_c + h_c + nadph_c	1.2.1.88	283.544	-4.3471e-35		R137	0	1pyr5c_c + 2.0 h2o_c + nadp_c --> glu__L_c + h_c + nadph_c	1.2.1.88	283.544	0		R137	0	1pyr5c_c + 2.0 h2o_c + nadp_c --> glu__L_c + h_c + nadph_c	1.2.1.88	283.544	0		R137
R138	0	C110COA_m + fad_m + h_m --> C11DCOA_m + fadh2_m	1.3.99.13,1.3.99.3				R138	0	C110COA_m + fad_m + h_m --> C11DCOA_m + fadh2_m	1.3.99.13,1.3.99.3				R138	0	C110COA_m + fad_m + h_m --> C11DCOA_m + fadh2_m	1.3.99.13,1.3.99.3				R138	0	C110COA_m + fad_m + h_m --> C11DCOA_m + fadh2_m	1.3.99.13,1.3.99.3				R138	0	C110COA_m + fad_m + h_m --> C11DCOA_m + fadh2_m	1.3.99.13,1.3.99.3				R138	0	C110COA_m + fad_m + h_m --> C11DCOA_m + fadh2_m	1.3.99.13,1.3.99.3				R138	0	C110COA_m + fad_m + h_m --> C11DCOA_m + fadh2_m	1.3.99.13,1.3.99.3				R138
R139_num1	0	glu__L_m + h_m --> 4abut_m + co2_m	4.1.1.15	60.8568	0		R139_num1	0	glu__L_m + h_m --> 4abut_m + co2_m	4.1.1.15	60.8568	0		R139_num1	0	glu__L_m + h_m --> 4abut_m + co2_m	4.1.1.15	60.8568	0		R139_num1	0	glu__L_m + h_m --> 4abut_m + co2_m	4.1.1.15	60.8568	0		R139_num1	0	glu__L_m + h_m --> 4abut_m + co2_m	4.1.1.15	60.8568	0		R139_num1	0	glu__L_m + h_m --> 4abut_m + co2_m	4.1.1.15	60.8568	0		R139_num1	0	glu__L_m + h_m --> 4abut_m + co2_m	4.1.1.15	60.8568	0		R139_num1
R140	0	4abut_m + akg_m --> glu__L_m + sucsal_m	2.6.1.19	1154.39	0		R140	0	4abut_m + akg_m --> glu__L_m + sucsal_m	2.6.1.19	1154.39	0		R140	0	4abut_m + akg_m --> glu__L_m + sucsal_m	2.6.1.19	1154.39	0		R140	0	4abut_m + akg_m --> glu__L_m + sucsal_m	2.6.1.19	1154.39	0		R140	0	4abut_m + akg_m --> glu__L_m + sucsal_m	2.6.1.19	1154.39	0		R140	0	4abut_m + akg_m --> glu__L_m + sucsal_m	2.6.1.19	1154.39	0		R140	0	4abut_m + akg_m --> glu__L_m + sucsal_m	2.6.1.19	1154.39	0		R140
R141	0	4abut_c + pyr_c --> ala__L_c + sucsal_c	2.6.1.96	216.881	0		R141	0	4abut_c + pyr_c --> ala__L_c + sucsal_c	2.6.1.96	216.881	0		R141	0	4abut_c + pyr_c --> ala__L_c + sucsal_c	2.6.1.96	216.881	0		R141	0	4abut_c + pyr_c --> ala__L_c + sucsal_c	2.6.1.96	216.881	0		R141	0	4abut_c + pyr_c --> ala__L_c + sucsal_c	2.6.1.96	216.881	0		R141	0	4abut_c + pyr_c --> ala__L_c + sucsal_c	2.6.1.96	216.881	0		R141	0	4abut_c + pyr_c --> ala__L_c + sucsal_c	2.6.1.96	216.881	0		R141
R142_num1	0	asp__L_c + atp_c + gln__L_c + h2o_c --> amp_c + asn__L_c + glu__L_c + h_c + ppi_c	6.3.1.1,6.3.5.4	99.5064	0		R142_num1	0	asp__L_c + atp_c + gln__L_c + h2o_c --> amp_c + asn__L_c + glu__L_c + h_c + ppi_c	6.3.1.1,6.3.5.4	99.5064	0		R142_num1	0	asp__L_c + atp_c + gln__L_c + h2o_c --> amp_c + asn__L_c + glu__L_c + h_c + ppi_c	6.3.1.1,6.3.5.4	99.5064	0		R142_num1	0	asp__L_c + atp_c + gln__L_c + h2o_c --> amp_c + asn__L_c + glu__L_c + h_c + ppi_c	6.3.1.1,6.3.5.4	99.5064	0		R142_num1	0	asp__L_c + atp_c + gln__L_c + h2o_c --> amp_c + asn__L_c + glu__L_c + h_c + ppi_c	6.3.1.1,6.3.5.4	99.5064	0		R142_num1	0	asp__L_c + atp_c + gln__L_c + h2o_c --> amp_c + asn__L_c + glu__L_c + h_c + ppi_c	6.3.1.1,6.3.5.4	99.5064	0		R142_num1	0	asp__L_c + atp_c + gln__L_c + h2o_c --> amp_c + asn__L_c + glu__L_c + h_c + ppi_c	6.3.1.1,6.3.5.4	99.5064	0		R142_num1
R143	-1.28455e-16	asn__L_c + h2o_c --> asp__L_c + nh4_c	3.5.1.1,3.5.1.38,3.5.5.4	4747.6	-2.70567e-20		R143	0	asn__L_c + h2o_c --> asp__L_c + nh4_c	3.5.1.1,3.5.1.38,3.5.5.4	4747.6	0		R143	-8.02688e-18	asn__L_c + h2o_c --> asp__L_c + nh4_c	3.5.1.1,3.5.1.38,3.5.5.4	4747.6	-1.69072e-21		R143	0	asn__L_c + h2o_c --> asp__L_c + nh4_c	3.5.1.1,3.5.1.38,3.5.5.4	4747.6	0		R143	0	asn__L_c + h2o_c --> asp__L_c + nh4_c	3.5.1.1,3.5.1.38,3.5.5.4	4747.6	0		R143	0	asn__L_c + h2o_c --> asp__L_c + nh4_c	3.5.1.1,3.5.1.38,3.5.5.4	4747.6	0		R143	0	asn__L_c + h2o_c --> asp__L_c + nh4_c	3.5.1.1,3.5.1.38,3.5.5.4	4747.6	0		R143
R144	0	asp__L_c + atp_c + nh4_c --> amp_c + asn__L_c + h_c + ppi_c	6.3.1.1				R144	0	asp__L_c + atp_c + nh4_c --> amp_c + asn__L_c + h_c + ppi_c	6.3.1.1				R144	0	asp__L_c + atp_c + nh4_c --> amp_c + asn__L_c + h_c + ppi_c	6.3.1.1				R144	0	asp__L_c + atp_c + nh4_c --> amp_c + asn__L_c + h_c + ppi_c	6.3.1.1				R144	0	asp__L_c + atp_c + nh4_c --> amp_c + asn__L_c + h_c + ppi_c	6.3.1.1				R144	0	asp__L_c + atp_c + nh4_c --> amp_c + asn__L_c + h_c + ppi_c	6.3.1.1				R144	0	asp__L_c + atp_c + nh4_c --> amp_c + asn__L_c + h_c + ppi_c	6.3.1.1				R144
R145	0	akg_c + gln__L_c + h_c + nadh_c --> 2.0 glu__L_c + nad_c	1.4.1.14	897.498	0		R145	2.44777	akg_c + gln__L_c + h_c + nadh_c --> 2.0 glu__L_c + nad_c	1.4.1.14	897.498	0.00272732		R145	2	akg_c + gln__L_c + h_c + nadh_c --> 2.0 glu__L_c + nad_c	1.4.1.14	897.498	0.00222842		R145	1.53039e-14	akg_c + gln__L_c + h_c + nadh_c --> 2.0 glu__L_c + nad_c	1.4.1.14	897.498	1.70517e-17		R145	0	akg_c + gln__L_c + h_c + nadh_c --> 2.0 glu__L_c + nad_c	1.4.1.14	897.498	0		R145	0	akg_c + gln__L_c + h_c + nadh_c --> 2.0 glu__L_c + nad_c	1.4.1.14	897.498	0		R145	0	akg_c + gln__L_c + h_c + nadh_c --> 2.0 glu__L_c + nad_c	1.4.1.14	897.498	0		R145
R146_num1	0	h2o_m + nad_m + sucsal_m --> 2.0 h_m + nadh_m + succ_m	1.2.1.16,1.2.1.24	1364.86	0		R146_num1	0	h2o_m + nad_m + sucsal_m --> 2.0 h_m + nadh_m + succ_m	1.2.1.16,1.2.1.24	1364.86	0		R146_num1	0	h2o_m + nad_m + sucsal_m --> 2.0 h_m + nadh_m + succ_m	1.2.1.16,1.2.1.24	1364.86	0		R146_num1	0	h2o_m + nad_m + sucsal_m --> 2.0 h_m + nadh_m + succ_m	1.2.1.16,1.2.1.24	1364.86	0		R146_num1	0	h2o_m + nad_m + sucsal_m --> 2.0 h_m + nadh_m + succ_m	1.2.1.16,1.2.1.24	1364.86	0		R146_num1	0	h2o_m + nad_m + sucsal_m --> 2.0 h_m + nadh_m + succ_m	1.2.1.16,1.2.1.24	1364.86	0		R146_num1	0	h2o_m + nad_m + sucsal_m --> 2.0 h_m + nadh_m + succ_m	1.2.1.16,1.2.1.24	1364.86	0		R146_num1
R147	0	h2o_c + nadp_c + sucsal_c --> 2.0 h_c + nadph_c + succ_c	1.2.1.79	1548.37	0		R147	0	h2o_c + nadp_c + sucsal_c --> 2.0 h_c + nadph_c + succ_c	1.2.1.79	1548.37	0		R147	0	h2o_c + nadp_c + sucsal_c --> 2.0 h_c + nadph_c + succ_c	1.2.1.79	1548.37	0		R147	9.5224e-15	h2o_c + nadp_c + sucsal_c --> 2.0 h_c + nadph_c + succ_c	1.2.1.79	1548.37	6.14994e-18		R147	2.32536e-16	h2o_c + nadp_c + sucsal_c --> 2.0 h_c + nadph_c + succ_c	1.2.1.79	1548.37	1.50181e-19		R147	0	h2o_c + nadp_c + sucsal_c --> 2.0 h_c + nadph_c + succ_c	1.2.1.79	1548.37	0		R147	0	h2o_c + nadp_c + sucsal_c --> 2.0 h_c + nadph_c + succ_c	1.2.1.79	1548.37	0		R147
R148_num1	0	XYLAN_e + h2o_e --> xyl__D_e		6737.28	0		R148_num1	0	XYLAN_e + h2o_e --> xyl__D_e		6737.28	0		R148_num1	0	XYLAN_e + h2o_e --> xyl__D_e		6737.28	0		R148_num1	0	XYLAN_e + h2o_e --> xyl__D_e		6737.28	0		R148_num1	0	XYLAN_e + h2o_e --> xyl__D_e		6737.28	0		R148_num1	0	XYLAN_e + h2o_e --> xyl__D_e		6737.28	0		R148_num1	0	XYLAN_e + h2o_e --> xyl__D_e		6737.28	0		R148_num1
R149	0	gam6p_c + h2o_c --> f6p_c + nh4_c	3.5.99.6	11238.6	0		R149	0	gam6p_c + h2o_c --> f6p_c + nh4_c	3.5.99.6	11238.6	0		R149	0	gam6p_c + h2o_c --> f6p_c + nh4_c	3.5.99.6	11238.6	0		R149	0	gam6p_c + h2o_c --> f6p_c + nh4_c	3.5.99.6	11238.6	0		R149	0	gam6p_c + h2o_c --> f6p_c + nh4_c	3.5.99.6	11238.6	0		R149	0	gam6p_c + h2o_c --> f6p_c + nh4_c	3.5.99.6	11238.6	0		R149	0	gam6p_c + h2o_c --> f6p_c + nh4_c	3.5.99.6	11238.6	0		R149
R150	0	acgam6p_c + h2o_c --> ac_c + gam6p_c	3.5.1.25	2173.62	0		R150	0	acgam6p_c + h2o_c --> ac_c + gam6p_c	3.5.1.25	2173.62	0		R150	0	acgam6p_c + h2o_c --> ac_c + gam6p_c	3.5.1.25	2173.62	0		R150	0	acgam6p_c + h2o_c --> ac_c + gam6p_c	3.5.1.25	2173.62	0		R150	0	acgam6p_c + h2o_c --> ac_c + gam6p_c	3.5.1.25	2173.62	0		R150	0	acgam6p_c + h2o_c --> ac_c + gam6p_c	3.5.1.25	2173.62	0		R150	0	acgam6p_c + h2o_c --> ac_c + gam6p_c	3.5.1.25	2173.62	0		R150
R151	0	acgam1p_c + h_c + utp_c --> ppi_c + uacgam_c	2.7.7.23	1393.75	0		R151	0	acgam1p_c + h_c + utp_c --> ppi_c + uacgam_c	2.7.7.23	1393.75	0		R151	-1.23608e-17	acgam1p_c + h_c + utp_c --> ppi_c + uacgam_c	2.7.7.23	1393.75	-8.86871e-21		R151	0	acgam1p_c + h_c + utp_c --> ppi_c + uacgam_c	2.7.7.23	1393.75	0		R151	0	acgam1p_c + h_c + utp_c --> ppi_c + uacgam_c	2.7.7.23	1393.75	0		R151	0	acgam1p_c + h_c + utp_c --> ppi_c + uacgam_c	2.7.7.23	1393.75	0		R151	0	acgam1p_c + h_c + utp_c --> ppi_c + uacgam_c	2.7.7.23	1393.75	0		R151
R152_num1	0	uacgam_c --> chtn_c + udp_c		151.751	0		R152_num1	0	uacgam_c --> chtn_c + udp_c		151.751	0		R152_num1	0	uacgam_c --> chtn_c + udp_c		151.751	0		R152_num1	0	uacgam_c --> chtn_c + udp_c		151.751	0		R152_num1	0	uacgam_c --> chtn_c + udp_c		151.751	0		R152_num1	0	uacgam_c --> chtn_c + udp_c		151.751	0		R152_num1	0	uacgam_c --> chtn_c + udp_c		151.751	0		R152_num1
R153_num1	0	chtn_c + h2o_c --> acgam_c		2599.08	0		R153_num1	0	chtn_c + h2o_c --> acgam_c		2599.08	0		R153_num1	0	chtn_c + h2o_c --> acgam_c		2599.08	0		R153_num1	0	chtn_c + h2o_c --> acgam_c		2599.08	0		R153_num1	0	chtn_c + h2o_c --> acgam_c		2599.08	0		R153_num1	0	chtn_c + h2o_c --> acgam_c		2599.08	0		R153_num1	0	chtn_c + h2o_c --> acgam_c		2599.08	0		R153_num1
R154_num1	0	acgam_c + h2o_c --> ac_c + gam_c	3.5.1.33				R154_num1	0	acgam_c + h2o_c --> ac_c + gam_c	3.5.1.33				R154_num1	0	acgam_c + h2o_c --> ac_c + gam_c	3.5.1.33				R154_num1	0	acgam_c + h2o_c --> ac_c + gam_c	3.5.1.33				R154_num1	0	acgam_c + h2o_c --> ac_c + gam_c	3.5.1.33				R154_num1	0	acgam_c + h2o_c --> ac_c + gam_c	3.5.1.33				R154_num1	0	acgam_c + h2o_c --> ac_c + gam_c	3.5.1.33				R154_num1
R155_num1	0	atp_c + gam_c --> adp_c + gam6p_c + h_c	2.7.1.1,2.7.1.8	1422.79	0		R155_num1	0	atp_c + gam_c --> adp_c + gam6p_c + h_c	2.7.1.1,2.7.1.8	1422.79	0		R155_num1	0	atp_c + gam_c --> adp_c + gam6p_c + h_c	2.7.1.1,2.7.1.8	1422.79	0		R155_num1	0	atp_c + gam_c --> adp_c + gam6p_c + h_c	2.7.1.1,2.7.1.8	1422.79	0		R155_num1	0	atp_c + gam_c --> adp_c + gam6p_c + h_c	2.7.1.1,2.7.1.8	1422.79	0		R155_num1	0	atp_c + gam_c --> adp_c + gam6p_c + h_c	2.7.1.1,2.7.1.8	1422.79	0		R155_num1	0	atp_c + gam_c --> adp_c + gam6p_c + h_c	2.7.1.1,2.7.1.8	1422.79	0		R155_num1
R156	0	3.0 chtn_c + 4.0 h2o_c --> CHITO_c + 3.0 ac_c + 3.0 h_c	3.5.1.41	1943.52	0		R156	0	3.0 chtn_c + 4.0 h2o_c --> CHITO_c + 3.0 ac_c + 3.0 h_c	3.5.1.41	1943.52	0		R156	0	3.0 chtn_c + 4.0 h2o_c --> CHITO_c + 3.0 ac_c + 3.0 h_c	3.5.1.41	1943.52	0		R156	0	3.0 chtn_c + 4.0 h2o_c --> CHITO_c + 3.0 ac_c + 3.0 h_c	3.5.1.41	1943.52	0		R156	0	3.0 chtn_c + 4.0 h2o_c --> CHITO_c + 3.0 ac_c + 3.0 h_c	3.5.1.41	1943.52	0		R156	0	3.0 chtn_c + 4.0 h2o_c --> CHITO_c + 3.0 ac_c + 3.0 h_c	3.5.1.41	1943.52	0		R156	0	3.0 chtn_c + 4.0 h2o_c --> CHITO_c + 3.0 ac_c + 3.0 h_c	3.5.1.41	1943.52	0		R156
R157	0	GLUA_c + h2o_c + h_c --> gam_c	3.2.1.165	820.972	0		R157	0	GLUA_c + h2o_c + h_c --> gam_c	3.2.1.165	820.972	0		R157	0	GLUA_c + h2o_c + h_c --> gam_c	3.2.1.165	820.972	0		R157	0	GLUA_c + h2o_c + h_c --> gam_c	3.2.1.165	820.972	0		R157	0	GLUA_c + h2o_c + h_c --> gam_c	3.2.1.165	820.972	0		R157	0	GLUA_c + h2o_c + h_c --> gam_c	3.2.1.165	820.972	0		R157	0	GLUA_c + h2o_c + h_c --> gam_c	3.2.1.165	820.972	0		R157
R158_num1	0	uacgam_c --> udpacgal_c	5.1.3.2,5.1.3.7	2674.23	0		R158_num1	0	uacgam_c --> udpacgal_c	5.1.3.2,5.1.3.7	2674.23	0		R158_num1	0	uacgam_c --> udpacgal_c	5.1.3.2,5.1.3.7	2674.23	0		R158_num1	0	uacgam_c --> udpacgal_c	5.1.3.2,5.1.3.7	2674.23	0		R158_num1	0	uacgam_c --> udpacgal_c	5.1.3.2,5.1.3.7	2674.23	0		R158_num1	0	uacgam_c --> udpacgal_c	5.1.3.2,5.1.3.7	2674.23	0		R158_num1	0	uacgam_c --> udpacgal_c	5.1.3.2,5.1.3.7	2674.23	0		R158_num1
R159	0	acgam6p_c --> acgam1p_c	5.4.2.3	451.656	0		R159	0	acgam6p_c --> acgam1p_c	5.4.2.3	451.656	0		R159	-1.23608e-17	acgam6p_c --> acgam1p_c	5.4.2.3	451.656	-2.73677e-20		R159	0	acgam6p_c --> acgam1p_c	5.4.2.3	451.656	0		R159	0	acgam6p_c --> acgam1p_c	5.4.2.3	451.656	0		R159	0	acgam6p_c --> acgam1p_c	5.4.2.3	451.656	0		R159	0	acgam6p_c --> acgam1p_c	5.4.2.3	451.656	0		R159
R160_num1	0	udpg_c --> CPD_663_c + h2o_c	4.2.1.76	6439.87	0		R160_num1	0	udpg_c --> CPD_663_c + h2o_c	4.2.1.76	6439.87	0		R160_num1	0	udpg_c --> CPD_663_c + h2o_c	4.2.1.76	6439.87	0		R160_num1	0	udpg_c --> CPD_663_c + h2o_c	4.2.1.76	6439.87	0		R160_num1	0	udpg_c --> CPD_663_c + h2o_c	4.2.1.76	6439.87	0		R160_num1	0	udpg_c --> CPD_663_c + h2o_c	4.2.1.76	6439.87	0		R160_num1	0	udpg_c --> CPD_663_c + h2o_c	4.2.1.76	6439.87	0		R160_num1
R161_num1	0	CPD_11540_c + h_c + nadph_c --> nadp_c + udprmn_c		1010.06	0		R161_num1	0	CPD_11540_c + h_c + nadph_c --> nadp_c + udprmn_c		1010.06	0		R161_num1	0	CPD_11540_c + h_c + nadph_c --> nadp_c + udprmn_c		1010.06	0		R161_num1	0	CPD_11540_c + h_c + nadph_c --> nadp_c + udprmn_c		1010.06	0		R161_num1	0	CPD_11540_c + h_c + nadph_c --> nadp_c + udprmn_c		1010.06	0		R161_num1	0	CPD_11540_c + h_c + nadph_c --> nadp_c + udprmn_c		1010.06	0		R161_num1	0	CPD_11540_c + h_c + nadph_c --> nadp_c + udprmn_c		1010.06	0		R161_num1
R162_num1	0	CPD_663_c + 2.0 h_c --> C17328_c	1.1.1.-,5.1.3.-				R162_num1	0	CPD_663_c + 2.0 h_c --> C17328_c	1.1.1.-,5.1.3.-				R162_num1	0	CPD_663_c + 2.0 h_c --> C17328_c	1.1.1.-,5.1.3.-				R162_num1	0	CPD_663_c + 2.0 h_c --> C17328_c	1.1.1.-,5.1.3.-				R162_num1	0	CPD_663_c + 2.0 h_c --> C17328_c	1.1.1.-,5.1.3.-				R162_num1	0	CPD_663_c + 2.0 h_c --> C17328_c	1.1.1.-,5.1.3.-				R162_num1	0	CPD_663_c + 2.0 h_c --> C17328_c	1.1.1.-,5.1.3.-				R162_num1
R163_num1	0	2.0 ficytb5_m + nadh_m --> 2.0 focytb5_m + h_m + nad_m	1.6.2.2	10940	0		R163_num1	0	2.0 ficytb5_m + nadh_m --> 2.0 focytb5_m + h_m + nad_m	1.6.2.2	10940	0		R163_num1	0	2.0 ficytb5_m + nadh_m --> 2.0 focytb5_m + h_m + nad_m	1.6.2.2	10940	0		R163_num1	0	2.0 ficytb5_m + nadh_m --> 2.0 focytb5_m + h_m + nad_m	1.6.2.2	10940	0		R163_num1	0	2.0 ficytb5_m + nadh_m --> 2.0 focytb5_m + h_m + nad_m	1.6.2.2	10940	0		R163_num1	0	2.0 ficytb5_m + nadh_m --> 2.0 focytb5_m + h_m + nad_m	1.6.2.2	10940	0		R163_num1	0	2.0 ficytb5_m + nadh_m --> 2.0 focytb5_m + h_m + nad_m	1.6.2.2	10940	0		R163_num1
R164_num1	0	3.0 ARABIN_e --> arab__L_e + 3.0 h2o_e		1729.93	0		R164_num1	0	3.0 ARABIN_e --> arab__L_e + 3.0 h2o_e		1729.93	0		R164_num1	0	3.0 ARABIN_e --> arab__L_e + 3.0 h2o_e		1729.93	0		R164_num1	0	3.0 ARABIN_e --> arab__L_e + 3.0 h2o_e		1729.93	0		R164_num1	0	3.0 ARABIN_e --> arab__L_e + 3.0 h2o_e		1729.93	0		R164_num1	0	3.0 ARABIN_e --> arab__L_e + 3.0 h2o_e		1729.93	0		R164_num1	0	3.0 ARABIN_e --> arab__L_e + 3.0 h2o_e		1729.93	0		R164_num1
R165_num1	0	TRNA_c + ala__L_c + atp_c --> TRNAALA_c + amp_c + ppi_c	6.1.1.7	628.257	0		R165_num1	0	TRNA_c + ala__L_c + atp_c --> TRNAALA_c + amp_c + ppi_c	6.1.1.7	628.257	0		R165_num1	0	TRNA_c + ala__L_c + atp_c --> TRNAALA_c + amp_c + ppi_c	6.1.1.7	628.257	0		R165_num1	0	TRNA_c + ala__L_c + atp_c --> TRNAALA_c + amp_c + ppi_c	6.1.1.7	628.257	0		R165_num1	0	TRNA_c + ala__L_c + atp_c --> TRNAALA_c + amp_c + ppi_c	6.1.1.7	628.257	0		R165_num1	0	TRNA_c + ala__L_c + atp_c --> TRNAALA_c + amp_c + ppi_c	6.1.1.7	628.257	0		R165_num1	0	TRNA_c + ala__L_c + atp_c --> TRNAALA_c + amp_c + ppi_c	6.1.1.7	628.257	0		R165_num1
R166_num1	0	TRNA_c + asp__L_c + atp_c --> TRNAASP_c + amp_c + ppi_c	6.1.1.12,6.1.1.23	253.49	0		R166_num1	0	TRNA_c + asp__L_c + atp_c --> TRNAASP_c + amp_c + ppi_c	6.1.1.12,6.1.1.23	253.49	0		R166_num1	0	TRNA_c + asp__L_c + atp_c --> TRNAASP_c + amp_c + ppi_c	6.1.1.12,6.1.1.23	253.49	0		R166_num1	0	TRNA_c + asp__L_c + atp_c --> TRNAASP_c + amp_c + ppi_c	6.1.1.12,6.1.1.23	253.49	0		R166_num1	0	TRNA_c + asp__L_c + atp_c --> TRNAASP_c + amp_c + ppi_c	6.1.1.12,6.1.1.23	253.49	0		R166_num1	0	TRNA_c + asp__L_c + atp_c --> TRNAASP_c + amp_c + ppi_c	6.1.1.12,6.1.1.23	253.49	0		R166_num1	0	TRNA_c + asp__L_c + atp_c --> TRNAASP_c + amp_c + ppi_c	6.1.1.12,6.1.1.23	253.49	0		R166_num1
R167_num1	0	TRNA_m + asp__L_m + atp_m --> TRNAASP_m + amp_m + ppi_m	6.1.1.12,6.1.1.23	253.49	0		R167_num1	0	TRNA_m + asp__L_m + atp_m --> TRNAASP_m + amp_m + ppi_m	6.1.1.12,6.1.1.23	253.49	0		R167_num1	0	TRNA_m + asp__L_m + atp_m --> TRNAASP_m + amp_m + ppi_m	6.1.1.12,6.1.1.23	253.49	0		R167_num1	0	TRNA_m + asp__L_m + atp_m --> TRNAASP_m + amp_m + ppi_m	6.1.1.12,6.1.1.23	253.49	0		R167_num1	0	TRNA_m + asp__L_m + atp_m --> TRNAASP_m + amp_m + ppi_m	6.1.1.12,6.1.1.23	253.49	0		R167_num1	0	TRNA_m + asp__L_m + atp_m --> TRNAASP_m + amp_m + ppi_m	6.1.1.12,6.1.1.23	253.49	0		R167_num1	0	TRNA_m + asp__L_m + atp_m --> TRNAASP_m + amp_m + ppi_m	6.1.1.12,6.1.1.23	253.49	0		R167_num1
R168_num1	0	TRNA_m + asn__L_m + atp_m --> TRNAASN_m + amp_m + ppi_m	6.1.1.22	521.473	0		R168_num1	0	TRNA_m + asn__L_m + atp_m --> TRNAASN_m + amp_m + ppi_m	6.1.1.22	521.473	0		R168_num1	0	TRNA_m + asn__L_m + atp_m --> TRNAASN_m + amp_m + ppi_m	6.1.1.22	521.473	0		R168_num1	0	TRNA_m + asn__L_m + atp_m --> TRNAASN_m + amp_m + ppi_m	6.1.1.22	521.473	0		R168_num1	0	TRNA_m + asn__L_m + atp_m --> TRNAASN_m + amp_m + ppi_m	6.1.1.22	521.473	0		R168_num1	0	TRNA_m + asn__L_m + atp_m --> TRNAASN_m + amp_m + ppi_m	6.1.1.22	521.473	0		R168_num1	0	TRNA_m + asn__L_m + atp_m --> TRNAASN_m + amp_m + ppi_m	6.1.1.22	521.473	0		R168_num1
R169_num1	0	TRNA_c + asn__L_c + atp_c --> TRNAASN_c + amp_c + ppi_c	6.1.1.22	521.473	0		R169_num1	0	TRNA_c + asn__L_c + atp_c --> TRNAASN_c + amp_c + ppi_c	6.1.1.22	521.473	0		R169_num1	-7.00718e-18	TRNA_c + asn__L_c + atp_c --> TRNAASN_c + amp_c + ppi_c	6.1.1.22	521.473	-1.34373e-20		R169_num1	0	TRNA_c + asn__L_c + atp_c --> TRNAASN_c + amp_c + ppi_c	6.1.1.22	521.473	0		R169_num1	0	TRNA_c + asn__L_c + atp_c --> TRNAASN_c + amp_c + ppi_c	6.1.1.22	521.473	0		R169_num1	0	TRNA_c + asn__L_c + atp_c --> TRNAASN_c + amp_c + ppi_c	6.1.1.22	521.473	0		R169_num1	0	TRNA_c + asn__L_c + atp_c --> TRNAASN_c + amp_c + ppi_c	6.1.1.22	521.473	0		R169_num1
R170_num1	0	TRNAASP_c + asn__L_c + atp_c + h2o_c --> TRNAASN_c + adp_c + asp__L_c + h_c + pi_c	6.3.5.6	2569.93	0		R170_num1	0	TRNAASP_c + asn__L_c + atp_c + h2o_c --> TRNAASN_c + adp_c + asp__L_c + h_c + pi_c	6.3.5.6	2569.93	0		R170_num1	0	TRNAASP_c + asn__L_c + atp_c + h2o_c --> TRNAASN_c + adp_c + asp__L_c + h_c + pi_c	6.3.5.6	2569.93	0		R170_num1	0	TRNAASP_c + asn__L_c + atp_c + h2o_c --> TRNAASN_c + adp_c + asp__L_c + h_c + pi_c	6.3.5.6	2569.93	0		R170_num1	0	TRNAASP_c + asn__L_c + atp_c + h2o_c --> TRNAASN_c + adp_c + asp__L_c + h_c + pi_c	6.3.5.6	2569.93	0		R170_num1	0	TRNAASP_c + asn__L_c + atp_c + h2o_c --> TRNAASN_c + adp_c + asp__L_c + h_c + pi_c	6.3.5.6	2569.93	0		R170_num1	0	TRNAASP_c + asn__L_c + atp_c + h2o_c --> TRNAASN_c + adp_c + asp__L_c + h_c + pi_c	6.3.5.6	2569.93	0		R170_num1
R171	0	TRNA_c + arg__L_c + atp_c --> TRNAARG_c + amp_c + ppi_c	6.1.1.19	706.135	0		R171	0	TRNA_c + arg__L_c + atp_c --> TRNAARG_c + amp_c + ppi_c	6.1.1.19	706.135	0		R171	-8.85048e-18	TRNA_c + arg__L_c + atp_c --> TRNAARG_c + amp_c + ppi_c	6.1.1.19	706.135	-1.25337e-20		R171	0	TRNA_c + arg__L_c + atp_c --> TRNAARG_c + amp_c + ppi_c	6.1.1.19	706.135	0		R171	0	TRNA_c + arg__L_c + atp_c --> TRNAARG_c + amp_c + ppi_c	6.1.1.19	706.135	0		R171	0	TRNA_c + arg__L_c + atp_c --> TRNAARG_c + amp_c + ppi_c	6.1.1.19	706.135	0		R171	0	TRNA_c + arg__L_c + atp_c --> TRNAARG_c + amp_c + ppi_c	6.1.1.19	706.135	0		R171
R172_num1	0	TRNA_c + atp_c + pro__L_c --> TRNAPRO_c + amp_c + ppi_c	6.1.1.15	1405.03	0		R172_num1	0	TRNA_c + atp_c + pro__L_c --> TRNAPRO_c + amp_c + ppi_c	6.1.1.15	1405.03	0		R172_num1	0	TRNA_c + atp_c + pro__L_c --> TRNAPRO_c + amp_c + ppi_c	6.1.1.15	1405.03	0		R172_num1	0	TRNA_c + atp_c + pro__L_c --> TRNAPRO_c + amp_c + ppi_c	6.1.1.15	1405.03	0		R172_num1	0	TRNA_c + atp_c + pro__L_c --> TRNAPRO_c + amp_c + ppi_c	6.1.1.15	1405.03	0		R172_num1	0	TRNA_c + atp_c + pro__L_c --> TRNAPRO_c + amp_c + ppi_c	6.1.1.15	1405.03	0		R172_num1	0	TRNA_c + atp_c + pro__L_c --> TRNAPRO_c + amp_c + ppi_c	6.1.1.15	1405.03	0		R172_num1
R173	0	TRNA_c + atp_c + cys__L_c --> TRNACYS_c + amp_c + ppi_c	6.1.1.16	517.375	0		R173	0	TRNA_c + atp_c + cys__L_c --> TRNACYS_c + amp_c + ppi_c	6.1.1.16	517.375	0		R173	-1.73218e-19	TRNA_c + atp_c + cys__L_c --> TRNACYS_c + amp_c + ppi_c	6.1.1.16	517.375	-3.34802e-22		R173	0	TRNA_c + atp_c + cys__L_c --> TRNACYS_c + amp_c + ppi_c	6.1.1.16	517.375	0		R173	0	TRNA_c + atp_c + cys__L_c --> TRNACYS_c + amp_c + ppi_c	6.1.1.16	517.375	0		R173	0	TRNA_c + atp_c + cys__L_c --> TRNACYS_c + amp_c + ppi_c	6.1.1.16	517.375	0		R173	0	TRNA_c + atp_c + cys__L_c --> TRNACYS_c + amp_c + ppi_c	6.1.1.16	517.375	0		R173
R174_num1	0	TRNA_c + atp_c + gln__L_c --> TRNAGLN_c + amp_c + ppi_c	6.1.1.18	461.387	0		R174_num1	0	TRNA_c + atp_c + gln__L_c --> TRNAGLN_c + amp_c + ppi_c	6.1.1.18	461.387	0		R174_num1	0	TRNA_c + atp_c + gln__L_c --> TRNAGLN_c + amp_c + ppi_c	6.1.1.18	461.387	0		R174_num1	0	TRNA_c + atp_c + gln__L_c --> TRNAGLN_c + amp_c + ppi_c	6.1.1.18	461.387	0		R174_num1	0	TRNA_c + atp_c + gln__L_c --> TRNAGLN_c + amp_c + ppi_c	6.1.1.18	461.387	0		R174_num1	0	TRNA_c + atp_c + gln__L_c --> TRNAGLN_c + amp_c + ppi_c	6.1.1.18	461.387	0		R174_num1	0	TRNA_c + atp_c + gln__L_c --> TRNAGLN_c + amp_c + ppi_c	6.1.1.18	461.387	0		R174_num1
R175_num1	0	TRNA_m + atp_m + gln__L_m --> TRNAGLN_m + amp_m + ppi_m	6.1.1.18	461.387	0		R175_num1	0	TRNA_m + atp_m + gln__L_m --> TRNAGLN_m + amp_m + ppi_m	6.1.1.18	461.387	0		R175_num1	0	TRNA_m + atp_m + gln__L_m --> TRNAGLN_m + amp_m + ppi_m	6.1.1.18	461.387	0		R175_num1	0	TRNA_m + atp_m + gln__L_m --> TRNAGLN_m + amp_m + ppi_m	6.1.1.18	461.387	0		R175_num1	0	TRNA_m + atp_m + gln__L_m --> TRNAGLN_m + amp_m + ppi_m	6.1.1.18	461.387	0		R175_num1	0	TRNA_m + atp_m + gln__L_m --> TRNAGLN_m + amp_m + ppi_m	6.1.1.18	461.387	0		R175_num1	0	TRNA_m + atp_m + gln__L_m --> TRNAGLN_m + amp_m + ppi_m	6.1.1.18	461.387	0		R175_num1
R176_num1	0	TRNAGLU_c + atp_c + gln__L_c + h2o_c --> TRNAGLN_c + adp_c + glu__L_c + h_c + pi_c	6.3.5.7	2569.93	0		R176_num1	0	TRNAGLU_c + atp_c + gln__L_c + h2o_c --> TRNAGLN_c + adp_c + glu__L_c + h_c + pi_c	6.3.5.7	2569.93	0		R176_num1	0	TRNAGLU_c + atp_c + gln__L_c + h2o_c --> TRNAGLN_c + adp_c + glu__L_c + h_c + pi_c	6.3.5.7	2569.93	0		R176_num1	0	TRNAGLU_c + atp_c + gln__L_c + h2o_c --> TRNAGLN_c + adp_c + glu__L_c + h_c + pi_c	6.3.5.7	2569.93	0		R176_num1	0	TRNAGLU_c + atp_c + gln__L_c + h2o_c --> TRNAGLN_c + adp_c + glu__L_c + h_c + pi_c	6.3.5.7	2569.93	0		R176_num1	0	TRNAGLU_c + atp_c + gln__L_c + h2o_c --> TRNAGLN_c + adp_c + glu__L_c + h_c + pi_c	6.3.5.7	2569.93	0		R176_num1	0	TRNAGLU_c + atp_c + gln__L_c + h2o_c --> TRNAGLN_c + adp_c + glu__L_c + h_c + pi_c	6.3.5.7	2569.93	0		R176_num1
R177_num1	0	TRNA_c + atp_c + ser__L_c --> TRNASER_c + amp_c + ppi_c	6.1.1.11	703.702	0		R177_num1	0	TRNA_c + atp_c + ser__L_c --> TRNASER_c + amp_c + ppi_c	6.1.1.11	703.702	0		R177_num1	0	TRNA_c + atp_c + ser__L_c --> TRNASER_c + amp_c + ppi_c	6.1.1.11	703.702	0		R177_num1	0	TRNA_c + atp_c + ser__L_c --> TRNASER_c + amp_c + ppi_c	6.1.1.11	703.702	0		R177_num1	0	TRNA_c + atp_c + ser__L_c --> TRNASER_c + amp_c + ppi_c	6.1.1.11	703.702	0		R177_num1	0	TRNA_c + atp_c + ser__L_c --> TRNASER_c + amp_c + ppi_c	6.1.1.11	703.702	0		R177_num1	0	TRNA_c + atp_c + ser__L_c --> TRNASER_c + amp_c + ppi_c	6.1.1.11	703.702	0		R177_num1
R178	0	TRNA_c + atp_c + gly_c --> TRNAGLY_c + amp_c + ppi_c	6.1.1.14	1458.64	0		R178	0	TRNA_c + atp_c + gly_c --> TRNAGLY_c + amp_c + ppi_c	6.1.1.14	1458.64	0		R178	-1.0416e-17	TRNA_c + atp_c + gly_c --> TRNAGLY_c + amp_c + ppi_c	6.1.1.14	1458.64	-7.14089e-21		R178	0	TRNA_c + atp_c + gly_c --> TRNAGLY_c + amp_c + ppi_c	6.1.1.14	1458.64	0		R178	0	TRNA_c + atp_c + gly_c --> TRNAGLY_c + amp_c + ppi_c	6.1.1.14	1458.64	0		R178	0	TRNA_c + atp_c + gly_c --> TRNAGLY_c + amp_c + ppi_c	6.1.1.14	1458.64	0		R178	0	TRNA_c + atp_c + gly_c --> TRNAGLY_c + amp_c + ppi_c	6.1.1.14	1458.64	0		R178
R179_num1	0	TRNA_m + atp_m + thr__L_m --> TRNATHR_m + amp_m + ppi_m	6.1.1.3	728.228	0		R179_num1	0	TRNA_m + atp_m + thr__L_m --> TRNATHR_m + amp_m + ppi_m	6.1.1.3	728.228	0		R179_num1	0	TRNA_m + atp_m + thr__L_m --> TRNATHR_m + amp_m + ppi_m	6.1.1.3	728.228	0		R179_num1	0	TRNA_m + atp_m + thr__L_m --> TRNATHR_m + amp_m + ppi_m	6.1.1.3	728.228	0		R179_num1	0	TRNA_m + atp_m + thr__L_m --> TRNATHR_m + amp_m + ppi_m	6.1.1.3	728.228	0		R179_num1	0	TRNA_m + atp_m + thr__L_m --> TRNATHR_m + amp_m + ppi_m	6.1.1.3	728.228	0		R179_num1	0	TRNA_m + atp_m + thr__L_m --> TRNATHR_m + amp_m + ppi_m	6.1.1.3	728.228	0		R179_num1
R180_num1	0	TRNA_c + atp_c + thr__L_c --> TRNATHR_c + amp_c + ppi_c	6.1.1.3	728.228	0		R180_num1	0	TRNA_c + atp_c + thr__L_c --> TRNATHR_c + amp_c + ppi_c	6.1.1.3	728.228	0		R180_num1	0	TRNA_c + atp_c + thr__L_c --> TRNATHR_c + amp_c + ppi_c	6.1.1.3	728.228	0		R180_num1	0	TRNA_c + atp_c + thr__L_c --> TRNATHR_c + amp_c + ppi_c	6.1.1.3	728.228	0		R180_num1	0	TRNA_c + atp_c + thr__L_c --> TRNATHR_c + amp_c + ppi_c	6.1.1.3	728.228	0		R180_num1	0	TRNA_c + atp_c + thr__L_c --> TRNATHR_c + amp_c + ppi_c	6.1.1.3	728.228	0		R180_num1	0	TRNA_c + atp_c + thr__L_c --> TRNATHR_c + amp_c + ppi_c	6.1.1.3	728.228	0		R180_num1
R181	0	TRNA_c + atp_c + his__L_c --> TRNAHIS_c + amp_c + ppi_c	6.1.1.21	1252.49	0		R181	0	TRNA_c + atp_c + his__L_c --> TRNAHIS_c + amp_c + ppi_c	6.1.1.21	1252.49	0		R181	-2.40545e-18	TRNA_c + atp_c + his__L_c --> TRNAHIS_c + amp_c + ppi_c	6.1.1.21	1252.49	-1.92054e-21		R181	0	TRNA_c + atp_c + his__L_c --> TRNAHIS_c + amp_c + ppi_c	6.1.1.21	1252.49	0		R181	0	TRNA_c + atp_c + his__L_c --> TRNAHIS_c + amp_c + ppi_c	6.1.1.21	1252.49	0		R181	0	TRNA_c + atp_c + his__L_c --> TRNAHIS_c + amp_c + ppi_c	6.1.1.21	1252.49	0		R181	0	TRNA_c + atp_c + his__L_c --> TRNAHIS_c + amp_c + ppi_c	6.1.1.21	1252.49	0		R181
R182_num1	0	TRNA_c + atp_c + ile__L_c --> TRNAILE_c + amp_c + ppi_c	6.1.1.5	1261.52	0		R182_num1	0	TRNA_c + atp_c + ile__L_c --> TRNAILE_c + amp_c + ppi_c	6.1.1.5	1261.52	0		R182_num1	-6.5725e-18	TRNA_c + atp_c + ile__L_c --> TRNAILE_c + amp_c + ppi_c	6.1.1.5	1261.52	-5.20997e-21		R182_num1	0	TRNA_c + atp_c + ile__L_c --> TRNAILE_c + amp_c + ppi_c	6.1.1.5	1261.52	0		R182_num1	0	TRNA_c + atp_c + ile__L_c --> TRNAILE_c + amp_c + ppi_c	6.1.1.5	1261.52	0		R182_num1	0	TRNA_c + atp_c + ile__L_c --> TRNAILE_c + amp_c + ppi_c	6.1.1.5	1261.52	0		R182_num1	0	TRNA_c + atp_c + ile__L_c --> TRNAILE_c + amp_c + ppi_c	6.1.1.5	1261.52	0		R182_num1
R183_num1	0	TRNA_m + atp_m + ile__L_m --> TRNAILE_m + amp_m + ppi_m	6.1.1.5	1261.52	0		R183_num1	0	TRNA_m + atp_m + ile__L_m --> TRNAILE_m + amp_m + ppi_m	6.1.1.5	1261.52	0		R183_num1	0	TRNA_m + atp_m + ile__L_m --> TRNAILE_m + amp_m + ppi_m	6.1.1.5	1261.52	0		R183_num1	0	TRNA_m + atp_m + ile__L_m --> TRNAILE_m + amp_m + ppi_m	6.1.1.5	1261.52	0		R183_num1	0	TRNA_m + atp_m + ile__L_m --> TRNAILE_m + amp_m + ppi_m	6.1.1.5	1261.52	0		R183_num1	0	TRNA_m + atp_m + ile__L_m --> TRNAILE_m + amp_m + ppi_m	6.1.1.5	1261.52	0		R183_num1	0	TRNA_m + atp_m + ile__L_m --> TRNAILE_m + amp_m + ppi_m	6.1.1.5	1261.52	0		R183_num1
R184_num1	0	TRNA_c + atp_c + val__L_c --> TRNAVAL_c + amp_c + ppi_c	6.1.1.9	177.199	0		R184_num1	0	TRNA_c + atp_c + val__L_c --> TRNAVAL_c + amp_c + ppi_c	6.1.1.9	177.199	0		R184_num1	0	TRNA_c + atp_c + val__L_c --> TRNAVAL_c + amp_c + ppi_c	6.1.1.9	177.199	0		R184_num1	0	TRNA_c + atp_c + val__L_c --> TRNAVAL_c + amp_c + ppi_c	6.1.1.9	177.199	0		R184_num1	0	TRNA_c + atp_c + val__L_c --> TRNAVAL_c + amp_c + ppi_c	6.1.1.9	177.199	0		R184_num1	0	TRNA_c + atp_c + val__L_c --> TRNAVAL_c + amp_c + ppi_c	6.1.1.9	177.199	0		R184_num1	0	TRNA_c + atp_c + val__L_c --> TRNAVAL_c + amp_c + ppi_c	6.1.1.9	177.199	0		R184_num1
R185_num1	0	TRNA_c + atp_c + leu__L_c --> TRNALEU_c + amp_c + ppi_c	6.1.1.4	573.593	0		R185_num1	0	TRNA_c + atp_c + leu__L_c --> TRNALEU_c + amp_c + ppi_c	6.1.1.4	573.593	0		R185_num1	-1.30339e-17	TRNA_c + atp_c + leu__L_c --> TRNALEU_c + amp_c + ppi_c	6.1.1.4	573.593	-2.27232e-20		R185_num1	0	TRNA_c + atp_c + leu__L_c --> TRNALEU_c + amp_c + ppi_c	6.1.1.4	573.593	0		R185_num1	0	TRNA_c + atp_c + leu__L_c --> TRNALEU_c + amp_c + ppi_c	6.1.1.4	573.593	0		R185_num1	0	TRNA_c + atp_c + leu__L_c --> TRNALEU_c + amp_c + ppi_c	6.1.1.4	573.593	0		R185_num1	0	TRNA_c + atp_c + leu__L_c --> TRNALEU_c + amp_c + ppi_c	6.1.1.4	573.593	0		R185_num1
R186_num1	0	TRNA_c + atp_c + lys__L_c --> TRNALYS_c + amp_c + ppi_c	6.1.1.6	518.899	0		R186_num1	0	TRNA_c + atp_c + lys__L_c --> TRNALYS_c + amp_c + ppi_c	6.1.1.6	518.899	0		R186_num1	-1.05794e-17	TRNA_c + atp_c + lys__L_c --> TRNALYS_c + amp_c + ppi_c	6.1.1.6	518.899	-2.03882e-20		R186_num1	0	TRNA_c + atp_c + lys__L_c --> TRNALYS_c + amp_c + ppi_c	6.1.1.6	518.899	0		R186_num1	0	TRNA_c + atp_c + lys__L_c --> TRNALYS_c + amp_c + ppi_c	6.1.1.6	518.899	0		R186_num1	0	TRNA_c + atp_c + lys__L_c --> TRNALYS_c + amp_c + ppi_c	6.1.1.6	518.899	0		R186_num1	0	TRNA_c + atp_c + lys__L_c --> TRNALYS_c + amp_c + ppi_c	6.1.1.6	518.899	0		R186_num1
R187_num1	0	TRNA_c + atp_c + met__L_c --> TRNAMET_c + amp_c + ppi_c	6.1.1.10	924.875	0		R187_num1	0	TRNA_c + atp_c + met__L_c --> TRNAMET_c + amp_c + ppi_c	6.1.1.10	924.875	0		R187_num1	0	TRNA_c + atp_c + met__L_c --> TRNAMET_c + amp_c + ppi_c	6.1.1.10	924.875	0		R187_num1	0	TRNA_c + atp_c + met__L_c --> TRNAMET_c + amp_c + ppi_c	6.1.1.10	924.875	0		R187_num1	0	TRNA_c + atp_c + met__L_c --> TRNAMET_c + amp_c + ppi_c	6.1.1.10	924.875	0		R187_num1	0	TRNA_c + atp_c + met__L_c --> TRNAMET_c + amp_c + ppi_c	6.1.1.10	924.875	0		R187_num1	0	TRNA_c + atp_c + met__L_c --> TRNAMET_c + amp_c + ppi_c	6.1.1.10	924.875	0		R187_num1
R188_num1	0	TRNA_m + atp_m + met__L_m --> TRNAMET_m + amp_m + ppi_m	6.1.1.10	924.875	0		R188_num1	0	TRNA_m + atp_m + met__L_m --> TRNAMET_m + amp_m + ppi_m	6.1.1.10	924.875	0		R188_num1	0	TRNA_m + atp_m + met__L_m --> TRNAMET_m + amp_m + ppi_m	6.1.1.10	924.875	0		R188_num1	0	TRNA_m + atp_m + met__L_m --> TRNAMET_m + amp_m + ppi_m	6.1.1.10	924.875	0		R188_num1	0	TRNA_m + atp_m + met__L_m --> TRNAMET_m + amp_m + ppi_m	6.1.1.10	924.875	0		R188_num1	0	TRNA_m + atp_m + met__L_m --> TRNAMET_m + amp_m + ppi_m	6.1.1.10	924.875	0		R188_num1	0	TRNA_m + atp_m + met__L_m --> TRNAMET_m + amp_m + ppi_m	6.1.1.10	924.875	0		R188_num1
R189_num1	0	TRNA_c + atp_c + tyr__L_c --> TRNATYR_c + amp_c + ppi_c	6.1.1.1	501.078	0		R189_num1	0	TRNA_c + atp_c + tyr__L_c --> TRNATYR_c + amp_c + ppi_c	6.1.1.1	501.078	0		R189_num1	-7.68044e-19	TRNA_c + atp_c + tyr__L_c --> TRNATYR_c + amp_c + ppi_c	6.1.1.1	501.078	-1.53278e-21		R189_num1	0	TRNA_c + atp_c + tyr__L_c --> TRNATYR_c + amp_c + ppi_c	6.1.1.1	501.078	0		R189_num1	0	TRNA_c + atp_c + tyr__L_c --> TRNATYR_c + amp_c + ppi_c	6.1.1.1	501.078	0		R189_num1	0	TRNA_c + atp_c + tyr__L_c --> TRNATYR_c + amp_c + ppi_c	6.1.1.1	501.078	0		R189_num1	0	TRNA_c + atp_c + tyr__L_c --> TRNATYR_c + amp_c + ppi_c	6.1.1.1	501.078	0		R189_num1
R190_num1	0	TRNA_m + atp_m + tyr__L_m --> TRNATYR_m + amp_m + ppi_m	6.1.1.1	501.078	0		R190_num1	0	TRNA_m + atp_m + tyr__L_m --> TRNATYR_m + amp_m + ppi_m	6.1.1.1	501.078	0		R190_num1	0	TRNA_m + atp_m + tyr__L_m --> TRNATYR_m + amp_m + ppi_m	6.1.1.1	501.078	0		R190_num1	0	TRNA_m + atp_m + tyr__L_m --> TRNATYR_m + amp_m + ppi_m	6.1.1.1	501.078	0		R190_num1	0	TRNA_m + atp_m + tyr__L_m --> TRNATYR_m + amp_m + ppi_m	6.1.1.1	501.078	0		R190_num1	0	TRNA_m + atp_m + tyr__L_m --> TRNATYR_m + amp_m + ppi_m	6.1.1.1	501.078	0		R190_num1	0	TRNA_m + atp_m + tyr__L_m --> TRNATYR_m + amp_m + ppi_m	6.1.1.1	501.078	0		R190_num1
R191_num1	0	TRNA_c + atp_c + trp__L_c --> TRNATRP_c + amp_c + ppi_c	6.1.1.2	279.689	0		R191_num1	0	TRNA_c + atp_c + trp__L_c --> TRNATRP_c + amp_c + ppi_c	6.1.1.2	279.689	0		R191_num1	0	TRNA_c + atp_c + trp__L_c --> TRNATRP_c + amp_c + ppi_c	6.1.1.2	279.689	0		R191_num1	0	TRNA_c + atp_c + trp__L_c --> TRNATRP_c + amp_c + ppi_c	6.1.1.2	279.689	0		R191_num1	0	TRNA_c + atp_c + trp__L_c --> TRNATRP_c + amp_c + ppi_c	6.1.1.2	279.689	0		R191_num1	0	TRNA_c + atp_c + trp__L_c --> TRNATRP_c + amp_c + ppi_c	6.1.1.2	279.689	0		R191_num1	0	TRNA_c + atp_c + trp__L_c --> TRNATRP_c + amp_c + ppi_c	6.1.1.2	279.689	0		R191_num1
R192	0	TRNA_c + atp_c + phe__L_c --> TRNAPHE_c + amp_c + ppi_c	6.1.1.20	170.577	0		R192	0	TRNA_c + atp_c + phe__L_c --> TRNAPHE_c + amp_c + ppi_c	6.1.1.20	170.577	0		R192	-5.66065e-18	TRNA_c + atp_c + phe__L_c --> TRNAPHE_c + amp_c + ppi_c	6.1.1.20	170.577	-3.31853e-20		R192	0	TRNA_c + atp_c + phe__L_c --> TRNAPHE_c + amp_c + ppi_c	6.1.1.20	170.577	0		R192	0	TRNA_c + atp_c + phe__L_c --> TRNAPHE_c + amp_c + ppi_c	6.1.1.20	170.577	0		R192	0	TRNA_c + atp_c + phe__L_c --> TRNAPHE_c + amp_c + ppi_c	6.1.1.20	170.577	0		R192	0	TRNA_c + atp_c + phe__L_c --> TRNAPHE_c + amp_c + ppi_c	6.1.1.20	170.577	0		R192
R193_num1	0	TRNA_m + atp_m + trp__L_m --> TRNATRP_m + amp_m + ppi_m	6.1.1.2	279.689	0		R193_num1	0	TRNA_m + atp_m + trp__L_m --> TRNATRP_m + amp_m + ppi_m	6.1.1.2	279.689	0		R193_num1	0	TRNA_m + atp_m + trp__L_m --> TRNATRP_m + amp_m + ppi_m	6.1.1.2	279.689	0		R193_num1	0	TRNA_m + atp_m + trp__L_m --> TRNATRP_m + amp_m + ppi_m	6.1.1.2	279.689	0		R193_num1	0	TRNA_m + atp_m + trp__L_m --> TRNATRP_m + amp_m + ppi_m	6.1.1.2	279.689	0		R193_num1	0	TRNA_m + atp_m + trp__L_m --> TRNATRP_m + amp_m + ppi_m	6.1.1.2	279.689	0		R193_num1	0	TRNA_m + atp_m + trp__L_m --> TRNATRP_m + amp_m + ppi_m	6.1.1.2	279.689	0		R193_num1
R194	0	g3p_c + iasp_c --> 2.0 h2o_c + pi_c + quln_c	2.5.1.72				R194	0	g3p_c + iasp_c --> 2.0 h2o_c + pi_c + quln_c	2.5.1.72				R194	0	g3p_c + iasp_c --> 2.0 h2o_c + pi_c + quln_c	2.5.1.72				R194	0	g3p_c + iasp_c --> 2.0 h2o_c + pi_c + quln_c	2.5.1.72				R194	0	g3p_c + iasp_c --> 2.0 h2o_c + pi_c + quln_c	2.5.1.72				R194	0	g3p_c + iasp_c --> 2.0 h2o_c + pi_c + quln_c	2.5.1.72				R194	0	g3p_c + iasp_c --> 2.0 h2o_c + pi_c + quln_c	2.5.1.72				R194
R195	0	h2o_c + nad_c + vanln_c --> 2.0 h_c + nadh_c + vanlt_c	1.2.1.67	1594.32	0		R195	0	h2o_c + nad_c + vanln_c --> 2.0 h_c + nadh_c + vanlt_c	1.2.1.67	1594.32	0		R195	0	h2o_c + nad_c + vanln_c --> 2.0 h_c + nadh_c + vanlt_c	1.2.1.67	1594.32	0		R195	0	h2o_c + nad_c + vanln_c --> 2.0 h_c + nadh_c + vanlt_c	1.2.1.67	1594.32	0		R195	0	h2o_c + nad_c + vanln_c --> 2.0 h_c + nadh_c + vanlt_c	1.2.1.67	1594.32	0		R195	0	h2o_c + nad_c + vanln_c --> 2.0 h_c + nadh_c + vanlt_c	1.2.1.67	1594.32	0		R195	0	h2o_c + nad_c + vanln_c --> 2.0 h_c + nadh_c + vanlt_c	1.2.1.67	1594.32	0		R195
R196_num1	0	BN_c + 2.0 h2o_c --> bz_c + nh4_c	3.5.5.1	2400.93	0		R196_num1	0	BN_c + 2.0 h2o_c --> bz_c + nh4_c	3.5.5.1	2400.93	0		R196_num1	0	BN_c + 2.0 h2o_c --> bz_c + nh4_c	3.5.5.1	2400.93	0		R196_num1	0	BN_c + 2.0 h2o_c --> bz_c + nh4_c	3.5.5.1	2400.93	0		R196_num1	0	BN_c + 2.0 h2o_c --> bz_c + nh4_c	3.5.5.1	2400.93	0		R196_num1	0	BN_c + 2.0 h2o_c --> bz_c + nh4_c	3.5.5.1	2400.93	0		R196_num1	0	BN_c + 2.0 h2o_c --> bz_c + nh4_c	3.5.5.1	2400.93	0		R196_num1
R197_num1	0	BFOR_c + h_c --> bzal_c + co2_c		2401.93	0		R197_num1	0	BFOR_c + h_c --> bzal_c + co2_c		2401.93	0		R197_num1	0	BFOR_c + h_c --> bzal_c + co2_c		2401.93	0		R197_num1	0	BFOR_c + h_c --> bzal_c + co2_c		2401.93	0		R197_num1	0	BFOR_c + h_c --> bzal_c + co2_c		2401.93	0		R197_num1	0	BFOR_c + h_c --> bzal_c + co2_c		2401.93	0		R197_num1	0	BFOR_c + h_c --> bzal_c + co2_c		2401.93	0		R197_num1
R198_num1	0	HC01104_e + h2o_e --> 4NP_e + h_e + pi_e	3.1.3.1,3.1.3.2,3.1.3.41	1519.4	0		R198_num1	0	HC01104_e + h2o_e --> 4NP_e + h_e + pi_e	3.1.3.1,3.1.3.2,3.1.3.41	1519.4	0		R198_num1	0	HC01104_e + h2o_e --> 4NP_e + h_e + pi_e	3.1.3.1,3.1.3.2,3.1.3.41	1519.4	0		R198_num1	0	HC01104_e + h2o_e --> 4NP_e + h_e + pi_e	3.1.3.1,3.1.3.2,3.1.3.41	1519.4	0		R198_num1	0	HC01104_e + h2o_e --> 4NP_e + h_e + pi_e	3.1.3.1,3.1.3.2,3.1.3.41	1519.4	0		R198_num1	0	HC01104_e + h2o_e --> 4NP_e + h_e + pi_e	3.1.3.1,3.1.3.2,3.1.3.41	1519.4	0		R198_num1	0	HC01104_e + h2o_e --> 4NP_e + h_e + pi_e	3.1.3.1,3.1.3.2,3.1.3.41	1519.4	0		R198_num1
R199_num1	0	PHL_c + h_c + nadph_c + o2_c --> catechol_c + h2o_c + nadp_c	1.14.13.7	751.725	0		R199_num1	0	PHL_c + h_c + nadph_c + o2_c --> catechol_c + h2o_c + nadp_c	1.14.13.7	751.725	0		R199_num1	0	PHL_c + h_c + nadph_c + o2_c --> catechol_c + h2o_c + nadp_c	1.14.13.7	751.725	0		R199_num1	0	PHL_c + h_c + nadph_c + o2_c --> catechol_c + h2o_c + nadp_c	1.14.13.7	751.725	0		R199_num1	0	PHL_c + h_c + nadph_c + o2_c --> catechol_c + h2o_c + nadp_c	1.14.13.7	751.725	0		R199_num1	0	PHL_c + h_c + nadph_c + o2_c --> catechol_c + h2o_c + nadp_c	1.14.13.7	751.725	0		R199_num1	0	PHL_c + h_c + nadph_c + o2_c --> catechol_c + h2o_c + nadp_c	1.14.13.7	751.725	0		R199_num1
R200	0	anth_c + 2.0 h_c + nadph_c + o2_c --> 23dhb_c + nadp_c + nh4_c	1.14.13.35	4078.5	0		R200	0	anth_c + 2.0 h_c + nadph_c + o2_c --> 23dhb_c + nadp_c + nh4_c	1.14.13.35	4078.5	0		R200	0	anth_c + 2.0 h_c + nadph_c + o2_c --> 23dhb_c + nadp_c + nh4_c	1.14.13.35	4078.5	0		R200	0	anth_c + 2.0 h_c + nadph_c + o2_c --> 23dhb_c + nadp_c + nh4_c	1.14.13.35	4078.5	0		R200	0	anth_c + 2.0 h_c + nadph_c + o2_c --> 23dhb_c + nadp_c + nh4_c	1.14.13.35	4078.5	0		R200	0	anth_c + 2.0 h_c + nadph_c + o2_c --> 23dhb_c + nadp_c + nh4_c	1.14.13.35	4078.5	0		R200	0	anth_c + 2.0 h_c + nadph_c + o2_c --> 23dhb_c + nadp_c + nh4_c	1.14.13.35	4078.5	0		R200
R201	0	C06206_m + h2o_m --> bz_m + 3.0 h_c + pi_m	3.6.1.7	14821.3	0		R201	0	C06206_m + h2o_m --> bz_m + 3.0 h_c + pi_m	3.6.1.7	14821.3	0		R201	0	C06206_m + h2o_m --> bz_m + 3.0 h_c + pi_m	3.6.1.7	14821.3	0		R201	0	C06206_m + h2o_m --> bz_m + 3.0 h_c + pi_m	3.6.1.7	14821.3	0		R201	0	C06206_m + h2o_m --> bz_m + 3.0 h_c + pi_m	3.6.1.7	14821.3	0		R201	0	C06206_m + h2o_m --> bz_m + 3.0 h_c + pi_m	3.6.1.7	14821.3	0		R201	0	C06206_m + h2o_m --> bz_m + 3.0 h_c + pi_m	3.6.1.7	14821.3	0		R201
R202_num1	0	CPD_17683_m + h2o_m --> bz_m + nh4_m	3.5.1.4	1345.3	0		R202_num1	0	CPD_17683_m + h2o_m --> bz_m + nh4_m	3.5.1.4	1345.3	0		R202_num1	0	CPD_17683_m + h2o_m --> bz_m + nh4_m	3.5.1.4	1345.3	0		R202_num1	0	CPD_17683_m + h2o_m --> bz_m + nh4_m	3.5.1.4	1345.3	0		R202_num1	0	CPD_17683_m + h2o_m --> bz_m + nh4_m	3.5.1.4	1345.3	0		R202_num1	0	CPD_17683_m + h2o_m --> bz_m + nh4_m	3.5.1.4	1345.3	0		R202_num1	0	CPD_17683_m + h2o_m --> bz_m + nh4_m	3.5.1.4	1345.3	0		R202_num1
R203	0	CPD_17683_c + h2o_c --> bz_c + nh4_c	3.5.1.4	2857.62	0		R203	0	CPD_17683_c + h2o_c --> bz_c + nh4_c	3.5.1.4	2857.62	0		R203	0	CPD_17683_c + h2o_c --> bz_c + nh4_c	3.5.1.4	2857.62	0		R203	0	CPD_17683_c + h2o_c --> bz_c + nh4_c	3.5.1.4	2857.62	0		R203	0	CPD_17683_c + h2o_c --> bz_c + nh4_c	3.5.1.4	2857.62	0		R203	0	CPD_17683_c + h2o_c --> bz_c + nh4_c	3.5.1.4	2857.62	0		R203	0	CPD_17683_c + h2o_c --> bz_c + nh4_c	3.5.1.4	2857.62	0		R203
R204	0	P_NITROPHENOL_m + h_m + nadph_m + o2_m --> P_BENZOQUINONE_m + h2o_m + nadp_m + no2_m	1.14.13.167				R204	0	P_NITROPHENOL_m + h_m + nadph_m + o2_m --> P_BENZOQUINONE_m + h2o_m + nadp_m + no2_m	1.14.13.167				R204	0	P_NITROPHENOL_m + h_m + nadph_m + o2_m --> P_BENZOQUINONE_m + h2o_m + nadp_m + no2_m	1.14.13.167				R204	0	P_NITROPHENOL_m + h_m + nadph_m + o2_m --> P_BENZOQUINONE_m + h2o_m + nadp_m + no2_m	1.14.13.167				R204	0	P_NITROPHENOL_m + h_m + nadph_m + o2_m --> P_BENZOQUINONE_m + h2o_m + nadp_m + no2_m	1.14.13.167				R204	0	P_NITROPHENOL_m + h_m + nadph_m + o2_m --> P_BENZOQUINONE_m + h2o_m + nadp_m + no2_m	1.14.13.167				R204	0	P_NITROPHENOL_m + h_m + nadph_m + o2_m --> P_BENZOQUINONE_m + h2o_m + nadp_m + no2_m	1.14.13.167				R204
R205	0	accoa_c + 2.0 amet_c + 3.0 malcoa_c --> CPD_17316_c + 2.0 ahcys_c + 3.0 co2_c + 4.0 coa_c		445.313	0		R205	0	accoa_c + 2.0 amet_c + 3.0 malcoa_c --> CPD_17316_c + 2.0 ahcys_c + 3.0 co2_c + 4.0 coa_c		445.313	0		R205	0	accoa_c + 2.0 amet_c + 3.0 malcoa_c --> CPD_17316_c + 2.0 ahcys_c + 3.0 co2_c + 4.0 coa_c		445.313	0		R205	0	accoa_c + 2.0 amet_c + 3.0 malcoa_c --> CPD_17316_c + 2.0 ahcys_c + 3.0 co2_c + 4.0 coa_c		445.313	0		R205	0	accoa_c + 2.0 amet_c + 3.0 malcoa_c --> CPD_17316_c + 2.0 ahcys_c + 3.0 co2_c + 4.0 coa_c		445.313	0		R205	0	accoa_c + 2.0 amet_c + 3.0 malcoa_c --> CPD_17316_c + 2.0 ahcys_c + 3.0 co2_c + 4.0 coa_c		445.313	0		R205	0	accoa_c + 2.0 amet_c + 3.0 malcoa_c --> CPD_17316_c + 2.0 ahcys_c + 3.0 co2_c + 4.0 coa_c		445.313	0		R205
R206_num1	0	TESTOSTERONE_x + h_x + nadph_x --> 17_BETA_HYDROXY_5ALPHA_ANDROSTAN_3_O_x + nadp_x	1.3.1.22				R206_num1	0	TESTOSTERONE_x + h_x + nadph_x --> 17_BETA_HYDROXY_5ALPHA_ANDROSTAN_3_O_x + nadp_x	1.3.1.22				R206_num1	0	TESTOSTERONE_x + h_x + nadph_x --> 17_BETA_HYDROXY_5ALPHA_ANDROSTAN_3_O_x + nadp_x	1.3.1.22				R206_num1	0	TESTOSTERONE_x + h_x + nadph_x --> 17_BETA_HYDROXY_5ALPHA_ANDROSTAN_3_O_x + nadp_x	1.3.1.22				R206_num1	0	TESTOSTERONE_x + h_x + nadph_x --> 17_BETA_HYDROXY_5ALPHA_ANDROSTAN_3_O_x + nadp_x	1.3.1.22				R206_num1	0	TESTOSTERONE_x + h_x + nadph_x --> 17_BETA_HYDROXY_5ALPHA_ANDROSTAN_3_O_x + nadp_x	1.3.1.22				R206_num1	0	TESTOSTERONE_x + h_x + nadph_x --> 17_BETA_HYDROXY_5ALPHA_ANDROSTAN_3_O_x + nadp_x	1.3.1.22				R206_num1
R207	0	ARACHIDONIC_ACID_c + C03024_c + o2_c --> C03161_c + C14748_c + h2o_c	1.14.14.80	56.8632	0		R207	0	ARACHIDONIC_ACID_c + C03024_c + o2_c --> C03161_c + C14748_c + h2o_c	1.14.14.80	56.8632	0		R207	0	ARACHIDONIC_ACID_c + C03024_c + o2_c --> C03161_c + C14748_c + h2o_c	1.14.14.80	56.8632	0		R207	0	ARACHIDONIC_ACID_c + C03024_c + o2_c --> C03161_c + C14748_c + h2o_c	1.14.14.80	56.8632	0		R207	0	ARACHIDONIC_ACID_c + C03024_c + o2_c --> C03161_c + C14748_c + h2o_c	1.14.14.80	56.8632	0		R207	0	ARACHIDONIC_ACID_c + C03024_c + o2_c --> C03161_c + C14748_c + h2o_c	1.14.14.80	56.8632	0		R207	0	ARACHIDONIC_ACID_c + C03024_c + o2_c --> C03161_c + C14748_c + h2o_c	1.14.14.80	56.8632	0		R207
R208	0	ARACHIDONIC_ACID_c + C03024_c + o2_c --> C03161_c + C14749_c + h2o_c	1.14.13.-,1.14.14.1,1.14.14.80,1.14.14.-	56.8632	0		R208	0	ARACHIDONIC_ACID_c + C03024_c + o2_c --> C03161_c + C14749_c + h2o_c	1.14.13.-,1.14.14.1,1.14.14.80,1.14.14.-	56.8632	0		R208	0	ARACHIDONIC_ACID_c + C03024_c + o2_c --> C03161_c + C14749_c + h2o_c	1.14.13.-,1.14.14.1,1.14.14.80,1.14.14.-	56.8632	0		R208	0	ARACHIDONIC_ACID_c + C03024_c + o2_c --> C03161_c + C14749_c + h2o_c	1.14.13.-,1.14.14.1,1.14.14.80,1.14.14.-	56.8632	0		R208	0	ARACHIDONIC_ACID_c + C03024_c + o2_c --> C03161_c + C14749_c + h2o_c	1.14.13.-,1.14.14.1,1.14.14.80,1.14.14.-	56.8632	0		R208	0	ARACHIDONIC_ACID_c + C03024_c + o2_c --> C03161_c + C14749_c + h2o_c	1.14.13.-,1.14.14.1,1.14.14.80,1.14.14.-	56.8632	0		R208	0	ARACHIDONIC_ACID_c + C03024_c + o2_c --> C03161_c + C14749_c + h2o_c	1.14.13.-,1.14.14.1,1.14.14.80,1.14.14.-	56.8632	0		R208
R209	0	ARACHIDONIC_ACID_m + o2_m --> 6E8Z11Z14Z_5S_5_HYDROPEROXYCOSA_6_m		532.099	0		R209	0	ARACHIDONIC_ACID_m + o2_m --> 6E8Z11Z14Z_5S_5_HYDROPEROXYCOSA_6_m		532.099	0		R209	0	ARACHIDONIC_ACID_m + o2_m --> 6E8Z11Z14Z_5S_5_HYDROPEROXYCOSA_6_m		532.099	0		R209	0	ARACHIDONIC_ACID_m + o2_m --> 6E8Z11Z14Z_5S_5_HYDROPEROXYCOSA_6_m		532.099	0		R209	0	ARACHIDONIC_ACID_m + o2_m --> 6E8Z11Z14Z_5S_5_HYDROPEROXYCOSA_6_m		532.099	0		R209	0	ARACHIDONIC_ACID_m + o2_m --> 6E8Z11Z14Z_5S_5_HYDROPEROXYCOSA_6_m		532.099	0		R209	0	ARACHIDONIC_ACID_m + o2_m --> 6E8Z11Z14Z_5S_5_HYDROPEROXYCOSA_6_m		532.099	0		R209
R210	-4.52781e-17	akg_c + orn__L_c --> glu5sa_c + glu__L_c	2.6.1.13	299.128	-1.51367e-19		R210	0	akg_c + orn__L_c --> glu5sa_c + glu__L_c	2.6.1.13	299.128	0		R210	-2.47966e-17	akg_c + orn__L_c --> glu5sa_c + glu__L_c	2.6.1.13	299.128	-8.28963e-20		R210	-1.17896e-14	akg_c + orn__L_c --> glu5sa_c + glu__L_c	2.6.1.13	299.128	-3.94134e-17		R210	-2.55659e-32	akg_c + orn__L_c --> glu5sa_c + glu__L_c	2.6.1.13	299.128	-8.54683e-35		R210	1.41091e-16	akg_c + orn__L_c --> glu5sa_c + glu__L_c	2.6.1.13	299.128	4.71674e-19		R210	0	akg_c + orn__L_c --> glu5sa_c + glu__L_c	2.6.1.13	299.128	0		R210
R211_num1	0	4gudbd_c + h2o_c --> 4gudbutn_c + nh4_c	3.5.1.4	1262.84	0		R211_num1	0	4gudbd_c + h2o_c --> 4gudbutn_c + nh4_c	3.5.1.4	1262.84	0		R211_num1	0	4gudbd_c + h2o_c --> 4gudbutn_c + nh4_c	3.5.1.4	1262.84	0		R211_num1	0	4gudbd_c + h2o_c --> 4gudbutn_c + nh4_c	3.5.1.4	1262.84	0		R211_num1	0	4gudbd_c + h2o_c --> 4gudbutn_c + nh4_c	3.5.1.4	1262.84	0		R211_num1	0	4gudbd_c + h2o_c --> 4gudbutn_c + nh4_c	3.5.1.4	1262.84	0		R211_num1	0	4gudbd_c + h2o_c --> 4gudbutn_c + nh4_c	3.5.1.4	1262.84	0		R211_num1
R212	0	glu5sa_m + h2o_m + nadp_m --> glu__L_m + 2.0 h_m + nadph_m	1.2.1.88	283.544	0		R212	0	glu5sa_m + h2o_m + nadp_m --> glu__L_m + 2.0 h_m + nadph_m	1.2.1.88	283.544	0		R212	0	glu5sa_m + h2o_m + nadp_m --> glu__L_m + 2.0 h_m + nadph_m	1.2.1.88	283.544	0		R212	0	glu5sa_m + h2o_m + nadp_m --> glu__L_m + 2.0 h_m + nadph_m	1.2.1.88	283.544	0		R212	0	glu5sa_m + h2o_m + nadp_m --> glu__L_m + 2.0 h_m + nadph_m	1.2.1.88	283.544	0		R212	0	glu5sa_m + h2o_m + nadp_m --> glu__L_m + 2.0 h_m + nadph_m	1.2.1.88	283.544	0		R212	0	glu5sa_m + h2o_m + nadp_m --> glu__L_m + 2.0 h_m + nadph_m	1.2.1.88	283.544	0		R212
R213	0	glu5sa_c + h2o_c + nad_c --> glu__L_c + 2.0 h_c + nadh_c	1.2.1.88	338.993	0		R213	0	glu5sa_c + h2o_c + nad_c --> glu__L_c + 2.0 h_c + nadh_c	1.2.1.88	338.993	0		R213	0	glu5sa_c + h2o_c + nad_c --> glu__L_c + 2.0 h_c + nadh_c	1.2.1.88	338.993	0		R213	-1.17896e-14	glu5sa_c + h2o_c + nad_c --> glu__L_c + 2.0 h_c + nadh_c	1.2.1.88	338.993	-3.47784e-17		R213	0	glu5sa_c + h2o_c + nad_c --> glu__L_c + 2.0 h_c + nadh_c	1.2.1.88	338.993	0		R213	1.41091e-16	glu5sa_c + h2o_c + nad_c --> glu__L_c + 2.0 h_c + nadh_c	1.2.1.88	338.993	4.16205e-19		R213	0	glu5sa_c + h2o_c + nad_c --> glu__L_c + 2.0 h_c + nadh_c	1.2.1.88	338.993	0		R213
R214	0	glu5sa_c --> 1pyr5c_c + h2o_c + h_c	2.6.1.13	335.704	0		R214	0	glu5sa_c --> 1pyr5c_c + h2o_c + h_c	2.6.1.13	335.704	0		R214	-2.47966e-17	glu5sa_c --> 1pyr5c_c + h2o_c + h_c	2.6.1.13	335.704	-7.38643e-20		R214	-4.73317e-30	glu5sa_c --> 1pyr5c_c + h2o_c + h_c	2.6.1.13	335.704	-1.40992e-32		R214	0	glu5sa_c --> 1pyr5c_c + h2o_c + h_c	2.6.1.13	335.704	0		R214	0	glu5sa_c --> 1pyr5c_c + h2o_c + h_c	2.6.1.13	335.704	0		R214	0	glu5sa_c --> 1pyr5c_c + h2o_c + h_c	2.6.1.13	335.704	0		R214
R215_num1	6.26914e-31	1pyr5c_c + 2.0 h_c + nadph_c --> nadp_c + pro__L_c	1.5.1.2	9992.5	6.27384e-35		R215_num1	0	1pyr5c_c + 2.0 h_c + nadph_c --> nadp_c + pro__L_c	1.5.1.2	9992.5	0		R215_num1	0	1pyr5c_c + 2.0 h_c + nadph_c --> nadp_c + pro__L_c	1.5.1.2	9992.5	0		R215_num1	0	1pyr5c_c + 2.0 h_c + nadph_c --> nadp_c + pro__L_c	1.5.1.2	9992.5	0		R215_num1	-5.11319e-32	1pyr5c_c + 2.0 h_c + nadph_c --> nadp_c + pro__L_c	1.5.1.2	9992.5	-5.11702e-36		R215_num1	0	1pyr5c_c + 2.0 h_c + nadph_c --> nadp_c + pro__L_c	1.5.1.2	9992.5	0		R215_num1	0	1pyr5c_c + 2.0 h_c + nadph_c --> nadp_c + pro__L_c	1.5.1.2	9992.5	0		R215_num1
R216_num1	0	nad_m + pro__L_m --> 1pyr5c_m + 2.0 h_m + nadh_m	1.5.1.2	9414.94	0		R216_num1	0	nad_m + pro__L_m --> 1pyr5c_m + 2.0 h_m + nadh_m	1.5.1.2	9414.94	0		R216_num1	-5.63777e-18	nad_m + pro__L_m --> 1pyr5c_m + 2.0 h_m + nadh_m	1.5.1.2	9414.94	-5.98811e-22		R216_num1	0	nad_m + pro__L_m --> 1pyr5c_m + 2.0 h_m + nadh_m	1.5.1.2	9414.94	0		R216_num1	-5.11319e-32	nad_m + pro__L_m --> 1pyr5c_m + 2.0 h_m + nadh_m	1.5.1.2	9414.94	-5.43093e-36		R216_num1	0	nad_m + pro__L_m --> 1pyr5c_m + 2.0 h_m + nadh_m	1.5.1.2	9414.94	0		R216_num1	0	nad_m + pro__L_m --> 1pyr5c_m + 2.0 h_m + nadh_m	1.5.1.2	9414.94	0		R216_num1
R217	0	1p3h5c_m + 2.0 h2o_m + nad_m --> e4hglu_m + h_m + nadh_m		329.632	0		R217	0	1p3h5c_m + 2.0 h2o_m + nad_m --> e4hglu_m + h_m + nadh_m		329.632	0		R217	0	1p3h5c_m + 2.0 h2o_m + nad_m --> e4hglu_m + h_m + nadh_m		329.632	0		R217	0	1p3h5c_m + 2.0 h2o_m + nad_m --> e4hglu_m + h_m + nadh_m		329.632	0		R217	0	1p3h5c_m + 2.0 h2o_m + nad_m --> e4hglu_m + h_m + nadh_m		329.632	0		R217	0	1p3h5c_m + 2.0 h2o_m + nad_m --> e4hglu_m + h_m + nadh_m		329.632	0		R217	0	1p3h5c_m + 2.0 h2o_m + nad_m --> e4hglu_m + h_m + nadh_m		329.632	0		R217
R218	0	D_4_HYDROXY_2_KETO_GLUTARATE_c --> glx_c + pyr_c	4.1.3.16	949.168	0		R218	0	D_4_HYDROXY_2_KETO_GLUTARATE_c --> glx_c + pyr_c	4.1.3.16	949.168	0		R218	0	D_4_HYDROXY_2_KETO_GLUTARATE_c --> glx_c + pyr_c	4.1.3.16	949.168	0		R218	0	D_4_HYDROXY_2_KETO_GLUTARATE_c --> glx_c + pyr_c	4.1.3.16	949.168	0		R218	0	D_4_HYDROXY_2_KETO_GLUTARATE_c --> glx_c + pyr_c	4.1.3.16	949.168	0		R218	0	D_4_HYDROXY_2_KETO_GLUTARATE_c --> glx_c + pyr_c	4.1.3.16	949.168	0		R218	0	D_4_HYDROXY_2_KETO_GLUTARATE_c --> glx_c + pyr_c	4.1.3.16	949.168	0		R218
R219	0	HC00576_c + h2o_c --> 4abut_c + his__L_c	3.4.13.18,3.4.13.20	889.299	0		R219	0	HC00576_c + h2o_c --> 4abut_c + his__L_c	3.4.13.18,3.4.13.20	889.299	0		R219	0	HC00576_c + h2o_c --> 4abut_c + his__L_c	3.4.13.18,3.4.13.20	889.299	0		R219	0	HC00576_c + h2o_c --> 4abut_c + his__L_c	3.4.13.18,3.4.13.20	889.299	0		R219	0	HC00576_c + h2o_c --> 4abut_c + his__L_c	3.4.13.18,3.4.13.20	889.299	0		R219	0	HC00576_c + h2o_c --> 4abut_c + his__L_c	3.4.13.18,3.4.13.20	889.299	0		R219	0	HC00576_c + h2o_c --> 4abut_c + his__L_c	3.4.13.18,3.4.13.20	889.299	0		R219
R220_num1	0	akg_c + e4hglu_c --> D_4_HYDROXY_2_KETO_GLUTARATE_c + glu__L_c	2.6.1.1,2.6.1.23	8650.06	0		R220_num1	0	akg_c + e4hglu_c --> D_4_HYDROXY_2_KETO_GLUTARATE_c + glu__L_c	2.6.1.1,2.6.1.23	8650.06	0		R220_num1	0	akg_c + e4hglu_c --> D_4_HYDROXY_2_KETO_GLUTARATE_c + glu__L_c	2.6.1.1,2.6.1.23	8650.06	0		R220_num1	0	akg_c + e4hglu_c --> D_4_HYDROXY_2_KETO_GLUTARATE_c + glu__L_c	2.6.1.1,2.6.1.23	8650.06	0		R220_num1	0	akg_c + e4hglu_c --> D_4_HYDROXY_2_KETO_GLUTARATE_c + glu__L_c	2.6.1.1,2.6.1.23	8650.06	0		R220_num1	0	akg_c + e4hglu_c --> D_4_HYDROXY_2_KETO_GLUTARATE_c + glu__L_c	2.6.1.1,2.6.1.23	8650.06	0		R220_num1	0	akg_c + e4hglu_c --> D_4_HYDROXY_2_KETO_GLUTARATE_c + glu__L_c	2.6.1.1,2.6.1.23	8650.06	0		R220_num1
R221	0	2.0 arg__L_c + 2.0 h_c + 2.0 nadph_c + 2.0 o2_c --> 2.0 CPD_13518_c + 2.0 h2o_c + 2.0 nadp_c		421.035	0		R221	0	2.0 arg__L_c + 2.0 h_c + 2.0 nadph_c + 2.0 o2_c --> 2.0 CPD_13518_c + 2.0 h2o_c + 2.0 nadp_c		421.035	0		R221	0	2.0 arg__L_c + 2.0 h_c + 2.0 nadph_c + 2.0 o2_c --> 2.0 CPD_13518_c + 2.0 h2o_c + 2.0 nadp_c		421.035	0		R221	0	2.0 arg__L_c + 2.0 h_c + 2.0 nadph_c + 2.0 o2_c --> 2.0 CPD_13518_c + 2.0 h2o_c + 2.0 nadp_c		421.035	0		R221	0	2.0 arg__L_c + 2.0 h_c + 2.0 nadph_c + 2.0 o2_c --> 2.0 CPD_13518_c + 2.0 h2o_c + 2.0 nadp_c		421.035	0		R221	0	2.0 arg__L_c + 2.0 h_c + 2.0 nadph_c + 2.0 o2_c --> 2.0 CPD_13518_c + 2.0 h2o_c + 2.0 nadp_c		421.035	0		R221	0	2.0 arg__L_c + 2.0 h_c + 2.0 nadph_c + 2.0 o2_c --> 2.0 CPD_13518_c + 2.0 h2o_c + 2.0 nadp_c		421.035	0		R221
R222	0	2.0 CPD_13518_c + nadph_c + 2.0 o2_c --> 2.0 citr__L_c + 2.0 h2o_c + h_c + nadp_c + 2.0 no_c		421.035	0		R222	0	2.0 CPD_13518_c + nadph_c + 2.0 o2_c --> 2.0 citr__L_c + 2.0 h2o_c + h_c + nadp_c + 2.0 no_c		421.035	0		R222	0	2.0 CPD_13518_c + nadph_c + 2.0 o2_c --> 2.0 citr__L_c + 2.0 h2o_c + h_c + nadp_c + 2.0 no_c		421.035	0		R222	0	2.0 CPD_13518_c + nadph_c + 2.0 o2_c --> 2.0 citr__L_c + 2.0 h2o_c + h_c + nadp_c + 2.0 no_c		421.035	0		R222	0	2.0 CPD_13518_c + nadph_c + 2.0 o2_c --> 2.0 citr__L_c + 2.0 h2o_c + h_c + nadp_c + 2.0 no_c		421.035	0		R222	0	2.0 CPD_13518_c + nadph_c + 2.0 o2_c --> 2.0 citr__L_c + 2.0 h2o_c + h_c + nadp_c + 2.0 no_c		421.035	0		R222	0	2.0 CPD_13518_c + nadph_c + 2.0 o2_c --> 2.0 citr__L_c + 2.0 h2o_c + h_c + nadp_c + 2.0 no_c		421.035	0		R222
R223_num1	0	4abutn_c + h2o_c + nadp_c --> 4abut_c + 2.0 h_c + nadph_c		1117.12	0		R223_num1	0	4abutn_c + h2o_c + nadp_c --> 4abut_c + 2.0 h_c + nadph_c		1117.12	0		R223_num1	0	4abutn_c + h2o_c + nadp_c --> 4abut_c + 2.0 h_c + nadph_c		1117.12	0		R223_num1	0	4abutn_c + h2o_c + nadp_c --> 4abut_c + 2.0 h_c + nadph_c		1117.12	0		R223_num1	0	4abutn_c + h2o_c + nadp_c --> 4abut_c + 2.0 h_c + nadph_c		1117.12	0		R223_num1	0	4abutn_c + h2o_c + nadp_c --> 4abut_c + 2.0 h_c + nadph_c		1117.12	0		R223_num1	0	4abutn_c + h2o_c + nadp_c --> 4abut_c + 2.0 h_c + nadph_c		1117.12	0		R223_num1
R224_num1	0	akg_m + o2_m + pro__L_m --> 4hpro_LT_m + co2_m + succ_m	1.14.11.57				R224_num1	0	akg_m + o2_m + pro__L_m --> 4hpro_LT_m + co2_m + succ_m	1.14.11.57				R224_num1	0	akg_m + o2_m + pro__L_m --> 4hpro_LT_m + co2_m + succ_m	1.14.11.57				R224_num1	0	akg_m + o2_m + pro__L_m --> 4hpro_LT_m + co2_m + succ_m	1.14.11.57				R224_num1	0	akg_m + o2_m + pro__L_m --> 4hpro_LT_m + co2_m + succ_m	1.14.11.57				R224_num1	0	akg_m + o2_m + pro__L_m --> 4hpro_LT_m + co2_m + succ_m	1.14.11.57				R224_num1	0	akg_m + o2_m + pro__L_m --> 4hpro_LT_m + co2_m + succ_m	1.14.11.57				R224_num1
R225	0	akg_m + sucorn_m --> glu__L_m + sucgsa_m	2.6.1.81	716.026	0		R225	0	akg_m + sucorn_m --> glu__L_m + sucgsa_m	2.6.1.81	716.026	0		R225	0	akg_m + sucorn_m --> glu__L_m + sucgsa_m	2.6.1.81	716.026	0		R225	0	akg_m + sucorn_m --> glu__L_m + sucgsa_m	2.6.1.81	716.026	0		R225	0	akg_m + sucorn_m --> glu__L_m + sucgsa_m	2.6.1.81	716.026	0		R225	0	akg_m + sucorn_m --> glu__L_m + sucgsa_m	2.6.1.81	716.026	0		R225	0	akg_m + sucorn_m --> glu__L_m + sucgsa_m	2.6.1.81	716.026	0		R225
R226	0	D_PROLINE_c + o2_c --> DELTA1_PYRROLINE_2_CARBOXYLATE_c + h2o2_c + h_c	1.4.3.3	3254.57	0		R226	0	D_PROLINE_c + o2_c --> DELTA1_PYRROLINE_2_CARBOXYLATE_c + h2o2_c + h_c	1.4.3.3	3254.57	0		R226	0	D_PROLINE_c + o2_c --> DELTA1_PYRROLINE_2_CARBOXYLATE_c + h2o2_c + h_c	1.4.3.3	3254.57	0		R226	0	D_PROLINE_c + o2_c --> DELTA1_PYRROLINE_2_CARBOXYLATE_c + h2o2_c + h_c	1.4.3.3	3254.57	0		R226	0	D_PROLINE_c + o2_c --> DELTA1_PYRROLINE_2_CARBOXYLATE_c + h2o2_c + h_c	1.4.3.3	3254.57	0		R226	0	D_PROLINE_c + o2_c --> DELTA1_PYRROLINE_2_CARBOXYLATE_c + h2o2_c + h_c	1.4.3.3	3254.57	0		R226	0	D_PROLINE_c + o2_c --> DELTA1_PYRROLINE_2_CARBOXYLATE_c + h2o2_c + h_c	1.4.3.3	3254.57	0		R226
R227	2.91401e-17	h2o_c + o2_c + sprm_c --> aproa_c + h2o2_c + spmd_c	1.5.3.16,1.5.3.17	1809.94	1.61001e-20		R227	0	h2o_c + o2_c + sprm_c --> aproa_c + h2o2_c + spmd_c	1.5.3.16,1.5.3.17	1809.94	0		R227	0	h2o_c + o2_c + sprm_c --> aproa_c + h2o2_c + spmd_c	1.5.3.16,1.5.3.17	1809.94	0		R227	-6.68835e-15	h2o_c + o2_c + sprm_c --> aproa_c + h2o2_c + spmd_c	1.5.3.16,1.5.3.17	1809.94	-3.69535e-18		R227	0	h2o_c + o2_c + sprm_c --> aproa_c + h2o2_c + spmd_c	1.5.3.16,1.5.3.17	1809.94	0		R227	0	h2o_c + o2_c + sprm_c --> aproa_c + h2o2_c + spmd_c	1.5.3.16,1.5.3.17	1809.94	0		R227	0	h2o_c + o2_c + sprm_c --> aproa_c + h2o2_c + spmd_c	1.5.3.16,1.5.3.17	1809.94	0		R227
R228	-2.91401e-17	h2o_c + o2_c + spmd_c --> 13DMPP_c + 4abutn_c + h2o2_c	1.5.3.14,1.5.99.6	2511.17	-1.16042e-20		R228	0	h2o_c + o2_c + spmd_c --> 13DMPP_c + 4abutn_c + h2o2_c	1.5.3.14,1.5.99.6	2511.17	0		R228	0	h2o_c + o2_c + spmd_c --> 13DMPP_c + 4abutn_c + h2o2_c	1.5.3.14,1.5.99.6	2511.17	0		R228	6.68835e-15	h2o_c + o2_c + spmd_c --> 13DMPP_c + 4abutn_c + h2o2_c	1.5.3.14,1.5.99.6	2511.17	2.66344e-18		R228	0	h2o_c + o2_c + spmd_c --> 13DMPP_c + 4abutn_c + h2o2_c	1.5.3.14,1.5.99.6	2511.17	0		R228	0	h2o_c + o2_c + spmd_c --> 13DMPP_c + 4abutn_c + h2o2_c	1.5.3.14,1.5.99.6	2511.17	0		R228	0	h2o_c + o2_c + spmd_c --> 13DMPP_c + 4abutn_c + h2o2_c	1.5.3.14,1.5.99.6	2511.17	0		R228
R229_num1	0	fad_m + 5.0 h_m + nndccoa_m --> C9DCOA_m + fadh2_m	1.3.99.3				R229_num1	0	fad_m + 5.0 h_m + nndccoa_m --> C9DCOA_m + fadh2_m	1.3.99.3				R229_num1	0	fad_m + 5.0 h_m + nndccoa_m --> C9DCOA_m + fadh2_m	1.3.99.3				R229_num1	0	fad_m + 5.0 h_m + nndccoa_m --> C9DCOA_m + fadh2_m	1.3.99.3				R229_num1	0	fad_m + 5.0 h_m + nndccoa_m --> C9DCOA_m + fadh2_m	1.3.99.3				R229_num1	0	fad_m + 5.0 h_m + nndccoa_m --> C9DCOA_m + fadh2_m	1.3.99.3				R229_num1	0	fad_m + 5.0 h_m + nndccoa_m --> C9DCOA_m + fadh2_m	1.3.99.3				R229_num1
R230_num1	0	4abutn_c + h2o_c + nad_c --> 4abut_c + 2.0 h_c + nadh_c	1.2.1.19	1324.83	0		R230_num1	0	4abutn_c + h2o_c + nad_c --> 4abut_c + 2.0 h_c + nadh_c	1.2.1.19	1324.83	0		R230_num1	0	4abutn_c + h2o_c + nad_c --> 4abut_c + 2.0 h_c + nadh_c	1.2.1.19	1324.83	0		R230_num1	0	4abutn_c + h2o_c + nad_c --> 4abut_c + 2.0 h_c + nadh_c	1.2.1.19	1324.83	0		R230_num1	0	4abutn_c + h2o_c + nad_c --> 4abut_c + 2.0 h_c + nadh_c	1.2.1.19	1324.83	0		R230_num1	0	4abutn_c + h2o_c + nad_c --> 4abut_c + 2.0 h_c + nadh_c	1.2.1.19	1324.83	0		R230_num1	0	4abutn_c + h2o_c + nad_c --> 4abut_c + 2.0 h_c + nadh_c	1.2.1.19	1324.83	0		R230_num1
R231_num1	0	h2o_m + o2_m + spmd_m --> aproa_m + h2o2_m + ptrc_m	1.5.3.17	1474.57	0		R231_num1	0	h2o_m + o2_m + spmd_m --> aproa_m + h2o2_m + ptrc_m	1.5.3.17	1474.57	0		R231_num1	0	h2o_m + o2_m + spmd_m --> aproa_m + h2o2_m + ptrc_m	1.5.3.17	1474.57	0		R231_num1	0	h2o_m + o2_m + spmd_m --> aproa_m + h2o2_m + ptrc_m	1.5.3.17	1474.57	0		R231_num1	0	h2o_m + o2_m + spmd_m --> aproa_m + h2o2_m + ptrc_m	1.5.3.17	1474.57	0		R231_num1	0	h2o_m + o2_m + spmd_m --> aproa_m + h2o2_m + ptrc_m	1.5.3.17	1474.57	0		R231_num1	0	h2o_m + o2_m + spmd_m --> aproa_m + h2o2_m + ptrc_m	1.5.3.17	1474.57	0		R231_num1
R232	0	atp_c + glu__L_c --> adp_c + glu5p_c	2.7.2.11				R232	0	atp_c + glu__L_c --> adp_c + glu5p_c	2.7.2.11				R232	0	atp_c + glu__L_c --> adp_c + glu5p_c	2.7.2.11				R232	0	atp_c + glu__L_c --> adp_c + glu5p_c	2.7.2.11				R232	0	atp_c + glu__L_c --> adp_c + glu5p_c	2.7.2.11				R232	0	atp_c + glu__L_c --> adp_c + glu5p_c	2.7.2.11				R232	0	atp_c + glu__L_c --> adp_c + glu5p_c	2.7.2.11				R232
R233	0	fad_m + pro__L_m --> 1pyr5c_m + fadh2_m	1.5.-.-				R233	0	fad_m + pro__L_m --> 1pyr5c_m + fadh2_m	1.5.-.-				R233	0	fad_m + pro__L_m --> 1pyr5c_m + fadh2_m	1.5.-.-				R233	0	fad_m + pro__L_m --> 1pyr5c_m + fadh2_m	1.5.-.-				R233	0	fad_m + pro__L_m --> 1pyr5c_m + fadh2_m	1.5.-.-				R233	0	fad_m + pro__L_m --> 1pyr5c_m + fadh2_m	1.5.-.-				R233	0	fad_m + pro__L_m --> 1pyr5c_m + fadh2_m	1.5.-.-				R233
R234_num1	-2.91401e-17	h_c + orn__L_c --> co2_c + ptrc_c	4.1.1.17	737.105	-3.95332e-20		R234_num1	0	h_c + orn__L_c --> co2_c + ptrc_c	4.1.1.17	737.105	0		R234_num1	0	h_c + orn__L_c --> co2_c + ptrc_c	4.1.1.17	737.105	0		R234_num1	6.68835e-15	h_c + orn__L_c --> co2_c + ptrc_c	4.1.1.17	737.105	9.07381e-18		R234_num1	0	h_c + orn__L_c --> co2_c + ptrc_c	4.1.1.17	737.105	0		R234_num1	0	h_c + orn__L_c --> co2_c + ptrc_c	4.1.1.17	737.105	0		R234_num1	0	h_c + orn__L_c --> co2_c + ptrc_c	4.1.1.17	737.105	0		R234_num1
R235	0	cbp_m + orn_m --> citr__L_m + h_m + pi_m	2.1.3.3	10162.7	0		R235	0	cbp_m + orn_m --> citr__L_m + h_m + pi_m	2.1.3.3	10162.7	0		R235	-1.70862e-17	cbp_m + orn_m --> citr__L_m + h_m + pi_m	2.1.3.3	10162.7	-1.68126e-21		R235	0	cbp_m + orn_m --> citr__L_m + h_m + pi_m	2.1.3.3	10162.7	0		R235	0	cbp_m + orn_m --> citr__L_m + h_m + pi_m	2.1.3.3	10162.7	0		R235	0	cbp_m + orn_m --> citr__L_m + h_m + pi_m	2.1.3.3	10162.7	0		R235	0	cbp_m + orn_m --> citr__L_m + h_m + pi_m	2.1.3.3	10162.7	0		R235
R236	0	accoa_m + glu__L_m --> acglu_m + coa_m + h_m	2.3.1.1	125.358	0		R236	0	accoa_m + glu__L_m --> acglu_m + coa_m + h_m	2.3.1.1	125.358	0		R236	0	accoa_m + glu__L_m --> acglu_m + coa_m + h_m	2.3.1.1	125.358	0		R236	0	accoa_m + glu__L_m --> acglu_m + coa_m + h_m	2.3.1.1	125.358	0		R236	0	accoa_m + glu__L_m --> acglu_m + coa_m + h_m	2.3.1.1	125.358	0		R236	0	accoa_m + glu__L_m --> acglu_m + coa_m + h_m	2.3.1.1	125.358	0		R236	0	accoa_m + glu__L_m --> acglu_m + coa_m + h_m	2.3.1.1	125.358	0		R236
R237_num1	0	acglu_m + atp_m --> acg5p_m + adp_m	2.7.2.8	178.339	0		R237_num1	0	acglu_m + atp_m --> acg5p_m + adp_m	2.7.2.8	178.339	0		R237_num1	0	acglu_m + atp_m --> acg5p_m + adp_m	2.7.2.8	178.339	0		R237_num1	0	acglu_m + atp_m --> acg5p_m + adp_m	2.7.2.8	178.339	0		R237_num1	0	acglu_m + atp_m --> acg5p_m + adp_m	2.7.2.8	178.339	0		R237_num1	0	acglu_m + atp_m --> acg5p_m + adp_m	2.7.2.8	178.339	0		R237_num1	0	acglu_m + atp_m --> acg5p_m + adp_m	2.7.2.8	178.339	0		R237_num1
R238_num1	-7.44183e-17	acg5p_m + h_m + nadph_m --> acg5sa_m + nadp_m + pi_m	1.2.1.38				R238_num1	0	acg5p_m + h_m + nadph_m --> acg5sa_m + nadp_m + pi_m	1.2.1.38				R238_num1	-2.16198e-17	acg5p_m + h_m + nadph_m --> acg5sa_m + nadp_m + pi_m	1.2.1.38				R238_num1	0	acg5p_m + h_m + nadph_m --> acg5sa_m + nadp_m + pi_m	1.2.1.38				R238_num1	2.55659e-32	acg5p_m + h_m + nadph_m --> acg5sa_m + nadp_m + pi_m	1.2.1.38				R238_num1	1.41091e-16	acg5p_m + h_m + nadph_m --> acg5sa_m + nadp_m + pi_m	1.2.1.38				R238_num1	0	acg5p_m + h_m + nadph_m --> acg5sa_m + nadp_m + pi_m	1.2.1.38				R238_num1
R239_num1	0	acg5sa_m + glu__L_m --> acorn_m + akg_m	2.6.1.11	327.071	0		R239_num1	0	acg5sa_m + glu__L_m --> acorn_m + akg_m	2.6.1.11	327.071	0		R239_num1	0	acg5sa_m + glu__L_m --> acorn_m + akg_m	2.6.1.11	327.071	0		R239_num1	0	acg5sa_m + glu__L_m --> acorn_m + akg_m	2.6.1.11	327.071	0		R239_num1	0	acg5sa_m + glu__L_m --> acorn_m + akg_m	2.6.1.11	327.071	0		R239_num1	0	acg5sa_m + glu__L_m --> acorn_m + akg_m	2.6.1.11	327.071	0		R239_num1	0	acg5sa_m + glu__L_m --> acorn_m + akg_m	2.6.1.11	327.071	0		R239_num1
R240_num1	0	acorn_m + glu__L_m --> acglu_m + orn_m	2.3.1.35				R240_num1	0	acorn_m + glu__L_m --> acglu_m + orn_m	2.3.1.35				R240_num1	0	acorn_m + glu__L_m --> acglu_m + orn_m	2.3.1.35				R240_num1	0	acorn_m + glu__L_m --> acglu_m + orn_m	2.3.1.35				R240_num1	0	acorn_m + glu__L_m --> acglu_m + orn_m	2.3.1.35				R240_num1	0	acorn_m + glu__L_m --> acglu_m + orn_m	2.3.1.35				R240_num1	0	acorn_m + glu__L_m --> acglu_m + orn_m	2.3.1.35				R240_num1
R241_num1	6.26914e-31	acorn_m + h2o_m --> ac_m + orn_m	3.5.1.14,3.5.1.16	3753.71	1.67012e-34		R241_num1	0	acorn_m + h2o_m --> ac_m + orn_m	3.5.1.14,3.5.1.16	3753.71	0		R241_num1	0	acorn_m + h2o_m --> ac_m + orn_m	3.5.1.14,3.5.1.16	3753.71	0		R241_num1	-5.10129e-15	acorn_m + h2o_m --> ac_m + orn_m	3.5.1.14,3.5.1.16	3753.71	-1.359e-18		R241_num1	-8.90237e-32	acorn_m + h2o_m --> ac_m + orn_m	3.5.1.14,3.5.1.16	3753.71	-2.37162e-35		R241_num1	0	acorn_m + h2o_m --> ac_m + orn_m	3.5.1.14,3.5.1.16	3753.71	0		R241_num1	0	acorn_m + h2o_m --> ac_m + orn_m	3.5.1.14,3.5.1.16	3753.71	0		R241_num1
R242	0	2.0 arg__L_c + h_c + 3.0 nadph_c + 4.0 o2_c --> 2.0 citr__L_c + 4.0 h2o_c + 3.0 nadp_c + 2.0 no_c	1.14.13.39	421.035	0		R242	0	2.0 arg__L_c + h_c + 3.0 nadph_c + 4.0 o2_c --> 2.0 citr__L_c + 4.0 h2o_c + 3.0 nadp_c + 2.0 no_c	1.14.13.39	421.035	0		R242	2.61541e-31	2.0 arg__L_c + h_c + 3.0 nadph_c + 4.0 o2_c --> 2.0 citr__L_c + 4.0 h2o_c + 3.0 nadp_c + 2.0 no_c	1.14.13.39	421.035	6.21186e-34		R242	0	2.0 arg__L_c + h_c + 3.0 nadph_c + 4.0 o2_c --> 2.0 citr__L_c + 4.0 h2o_c + 3.0 nadp_c + 2.0 no_c	1.14.13.39	421.035	0		R242	0	2.0 arg__L_c + h_c + 3.0 nadph_c + 4.0 o2_c --> 2.0 citr__L_c + 4.0 h2o_c + 3.0 nadp_c + 2.0 no_c	1.14.13.39	421.035	0		R242	0	2.0 arg__L_c + h_c + 3.0 nadph_c + 4.0 o2_c --> 2.0 citr__L_c + 4.0 h2o_c + 3.0 nadp_c + 2.0 no_c	1.14.13.39	421.035	0		R242	0	2.0 arg__L_c + h_c + 3.0 nadph_c + 4.0 o2_c --> 2.0 citr__L_c + 4.0 h2o_c + 3.0 nadp_c + 2.0 no_c	1.14.13.39	421.035	0		R242
R243_num1	0	asp__L_c + atp_c + citr__L_c --> amp_c + argsuc_c + h_c + ppi_c	6.3.4.5				R243_num1	0	asp__L_c + atp_c + citr__L_c --> amp_c + argsuc_c + h_c + ppi_c	6.3.4.5				R243_num1	0	asp__L_c + atp_c + citr__L_c --> amp_c + argsuc_c + h_c + ppi_c	6.3.4.5				R243_num1	-1.02026e-14	asp__L_c + atp_c + citr__L_c --> amp_c + argsuc_c + h_c + ppi_c	6.3.4.5				R243_num1	0	asp__L_c + atp_c + citr__L_c --> amp_c + argsuc_c + h_c + ppi_c	6.3.4.5				R243_num1	0	asp__L_c + atp_c + citr__L_c --> amp_c + argsuc_c + h_c + ppi_c	6.3.4.5				R243_num1	0	asp__L_c + atp_c + citr__L_c --> amp_c + argsuc_c + h_c + ppi_c	6.3.4.5				R243_num1
R244	0	argsuc_c --> arg__L_c + fum_c	4.3.2.1	1949.44	0		R244	0	argsuc_c --> arg__L_c + fum_c	4.3.2.1	1949.44	0		R244	0	argsuc_c --> arg__L_c + fum_c	4.3.2.1	1949.44	0		R244	-1.02026e-14	argsuc_c --> arg__L_c + fum_c	4.3.2.1	1949.44	-5.2336e-18		R244	0	argsuc_c --> arg__L_c + fum_c	4.3.2.1	1949.44	0		R244	0	argsuc_c --> arg__L_c + fum_c	4.3.2.1	1949.44	0		R244	0	argsuc_c --> arg__L_c + fum_c	4.3.2.1	1949.44	0		R244
R245_num1	0	asp__L_m + atp_m + citr__L_m --> amp_m + argsuc_m + h_m + ppi_m	6.3.4.5				R245_num1	0	asp__L_m + atp_m + citr__L_m --> amp_m + argsuc_m + h_m + ppi_m	6.3.4.5				R245_num1	0	asp__L_m + atp_m + citr__L_m --> amp_m + argsuc_m + h_m + ppi_m	6.3.4.5				R245_num1	1.02026e-14	asp__L_m + atp_m + citr__L_m --> amp_m + argsuc_m + h_m + ppi_m	6.3.4.5				R245_num1	0	asp__L_m + atp_m + citr__L_m --> amp_m + argsuc_m + h_m + ppi_m	6.3.4.5				R245_num1	2.46519e-32	asp__L_m + atp_m + citr__L_m --> amp_m + argsuc_m + h_m + ppi_m	6.3.4.5				R245_num1	0	asp__L_m + atp_m + citr__L_m --> amp_m + argsuc_m + h_m + ppi_m	6.3.4.5				R245_num1
R246	0	argsuc_m --> arg__L_m + fum_m	4.3.2.1	1949.44	0		R246	0	argsuc_m --> arg__L_m + fum_m	4.3.2.1	1949.44	0		R246	-1.70862e-17	argsuc_m --> arg__L_m + fum_m	4.3.2.1	1949.44	-8.76468e-21		R246	0	argsuc_m --> arg__L_m + fum_m	4.3.2.1	1949.44	0		R246	0	argsuc_m --> arg__L_m + fum_m	4.3.2.1	1949.44	0		R246	0	argsuc_m --> arg__L_m + fum_m	4.3.2.1	1949.44	0		R246	0	argsuc_m --> arg__L_m + fum_m	4.3.2.1	1949.44	0		R246
R247_num1	0	glu__L_c + oaa_c --> akg_c + asp__L_c	2.6.1.1	2177.35	0		R247_num1	0	glu__L_c + oaa_c --> akg_c + asp__L_c	2.6.1.1	2177.35	0		R247_num1	0	glu__L_c + oaa_c --> akg_c + asp__L_c	2.6.1.1	2177.35	0		R247_num1	0	glu__L_c + oaa_c --> akg_c + asp__L_c	2.6.1.1	2177.35	0		R247_num1	0	glu__L_c + oaa_c --> akg_c + asp__L_c	2.6.1.1	2177.35	0		R247_num1	0	glu__L_c + oaa_c --> akg_c + asp__L_c	2.6.1.1	2177.35	0		R247_num1	0	glu__L_c + oaa_c --> akg_c + asp__L_c	2.6.1.1	2177.35	0		R247_num1
R248	0	glu__L_c + pyr_c --> akg_c + ala__L_c	2.6.1.2	1180.96	0		R248	0	glu__L_c + pyr_c --> akg_c + ala__L_c	2.6.1.2	1180.96	0		R248	0	glu__L_c + pyr_c --> akg_c + ala__L_c	2.6.1.2	1180.96	0		R248	0	glu__L_c + pyr_c --> akg_c + ala__L_c	2.6.1.2	1180.96	0		R248	0	glu__L_c + pyr_c --> akg_c + ala__L_c	2.6.1.2	1180.96	0		R248	0	glu__L_c + pyr_c --> akg_c + ala__L_c	2.6.1.2	1180.96	0		R248	0	glu__L_c + pyr_c --> akg_c + ala__L_c	2.6.1.2	1180.96	0		R248
R249	0	glu__L_m + pyr_m --> akg_m + ala__L_m	2.6.1.2	1180.96	0		R249	0	glu__L_m + pyr_m --> akg_m + ala__L_m	2.6.1.2	1180.96	0		R249	0	glu__L_m + pyr_m --> akg_m + ala__L_m	2.6.1.2	1180.96	0		R249	0	glu__L_m + pyr_m --> akg_m + ala__L_m	2.6.1.2	1180.96	0		R249	0	glu__L_m + pyr_m --> akg_m + ala__L_m	2.6.1.2	1180.96	0		R249	0	glu__L_m + pyr_m --> akg_m + ala__L_m	2.6.1.2	1180.96	0		R249	0	glu__L_m + pyr_m --> akg_m + ala__L_m	2.6.1.2	1180.96	0		R249
R250	0	glu__L_m + oaa_m --> akg_m + asp__L_m	2.6.1.1	3451.11	0		R250	0	glu__L_m + oaa_m --> akg_m + asp__L_m	2.6.1.1	3451.11	0		R250	-1.70862e-17	glu__L_m + oaa_m --> akg_m + asp__L_m	2.6.1.1	3451.11	-4.95092e-21		R250	0	glu__L_m + oaa_m --> akg_m + asp__L_m	2.6.1.1	3451.11	0		R250	0	glu__L_m + oaa_m --> akg_m + asp__L_m	2.6.1.1	3451.11	0		R250	0	glu__L_m + oaa_m --> akg_m + asp__L_m	2.6.1.1	3451.11	0		R250	0	glu__L_m + oaa_m --> akg_m + asp__L_m	2.6.1.1	3451.11	0		R250
R251_num1	0	h2o_c + nad_c + xan_c --> h_c + nadh_c + urate_c	1.17.1.4	502.525	0		R251_num1	0	h2o_c + nad_c + xan_c --> h_c + nadh_c + urate_c	1.17.1.4	502.525	0		R251_num1	0	h2o_c + nad_c + xan_c --> h_c + nadh_c + urate_c	1.17.1.4	502.525	0		R251_num1	0	h2o_c + nad_c + xan_c --> h_c + nadh_c + urate_c	1.17.1.4	502.525	0		R251_num1	0	h2o_c + nad_c + xan_c --> h_c + nadh_c + urate_c	1.17.1.4	502.525	0		R251_num1	0	h2o_c + nad_c + xan_c --> h_c + nadh_c + urate_c	1.17.1.4	502.525	0		R251_num1	0	h2o_c + nad_c + xan_c --> h_c + nadh_c + urate_c	1.17.1.4	502.525	0		R251_num1
R252_num1	0	gln__L_c + h2o_c --> glu__L_c + nh4_c	1.4.1.13,1.4.1.14,1.4.7.1,3.5.1.2	190.02	0		R252_num1	0	gln__L_c + h2o_c --> glu__L_c + nh4_c	1.4.1.13,1.4.1.14,1.4.7.1,3.5.1.2	190.02	0		R252_num1	0	gln__L_c + h2o_c --> glu__L_c + nh4_c	1.4.1.13,1.4.1.14,1.4.7.1,3.5.1.2	190.02	0		R252_num1	0	gln__L_c + h2o_c --> glu__L_c + nh4_c	1.4.1.13,1.4.1.14,1.4.7.1,3.5.1.2	190.02	0		R252_num1	0	gln__L_c + h2o_c --> glu__L_c + nh4_c	1.4.1.13,1.4.1.14,1.4.7.1,3.5.1.2	190.02	0		R252_num1	0	gln__L_c + h2o_c --> glu__L_c + nh4_c	1.4.1.13,1.4.1.14,1.4.7.1,3.5.1.2	190.02	0		R252_num1	0	gln__L_c + h2o_c --> glu__L_c + nh4_c	1.4.1.13,1.4.1.14,1.4.7.1,3.5.1.2	190.02	0		R252_num1
R253	3.53533e-16	glu__L_c + h2o_c + nadp_c --> akg_c + h_c + nadph_c + nh4_c	1.4.1.4	1873.88	1.88664e-19		R253	0	glu__L_c + h2o_c + nadp_c --> akg_c + h_c + nadph_c + nh4_c	1.4.1.4	1873.88	0		R253	0	glu__L_c + h2o_c + nadp_c --> akg_c + h_c + nadph_c + nh4_c	1.4.1.4	1873.88	0		R253	0	glu__L_c + h2o_c + nadp_c --> akg_c + h_c + nadph_c + nh4_c	1.4.1.4	1873.88	0		R253	0	glu__L_c + h2o_c + nadp_c --> akg_c + h_c + nadph_c + nh4_c	1.4.1.4	1873.88	0		R253	1.34152e-16	glu__L_c + h2o_c + nadp_c --> akg_c + h_c + nadph_c + nh4_c	1.4.1.4	1873.88	7.15905e-20		R253	0	glu__L_c + h2o_c + nadp_c --> akg_c + h_c + nadph_c + nh4_c	1.4.1.4	1873.88	0		R253
R254_num1	0	atp_c + glu__L_c + nh4_c --> adp_c + gln__L_c + h_c + pi_c	6.3.1.2	1230.81	0		R254_num1	3.40877	atp_c + glu__L_c + nh4_c --> adp_c + gln__L_c + h_c + pi_c	6.3.1.2	1230.81	0.00276954		R254_num1	2	atp_c + glu__L_c + nh4_c --> adp_c + gln__L_c + h_c + pi_c	6.3.1.2	1230.81	0.00162495		R254_num1	0	atp_c + glu__L_c + nh4_c --> adp_c + gln__L_c + h_c + pi_c	6.3.1.2	1230.81	0		R254_num1	0	atp_c + glu__L_c + nh4_c --> adp_c + gln__L_c + h_c + pi_c	6.3.1.2	1230.81	0		R254_num1	6.10407e-17	atp_c + glu__L_c + nh4_c --> adp_c + gln__L_c + h_c + pi_c	6.3.1.2	1230.81	4.9594e-20		R254_num1	0	atp_c + glu__L_c + nh4_c --> adp_c + gln__L_c + h_c + pi_c	6.3.1.2	1230.81	0		R254_num1
R255_num1	0	2.0 atp_m + hco3_m + nh4_m --> 2.0 adp_m + cbp_m + 2.0 h_m + pi_m	6.3.4.16	468.502	0		R255_num1	0	2.0 atp_m + hco3_m + nh4_m --> 2.0 adp_m + cbp_m + 2.0 h_m + pi_m	6.3.4.16	468.502	0		R255_num1	-1.92731e-17	2.0 atp_m + hco3_m + nh4_m --> 2.0 adp_m + cbp_m + 2.0 h_m + pi_m	6.3.4.16	468.502	-4.11378e-20		R255_num1	0	2.0 atp_m + hco3_m + nh4_m --> 2.0 adp_m + cbp_m + 2.0 h_m + pi_m	6.3.4.16	468.502	0		R255_num1	0	2.0 atp_m + hco3_m + nh4_m --> 2.0 adp_m + cbp_m + 2.0 h_m + pi_m	6.3.4.16	468.502	0		R255_num1	0	2.0 atp_m + hco3_m + nh4_m --> 2.0 adp_m + cbp_m + 2.0 h_m + pi_m	6.3.4.16	468.502	0		R255_num1	0	2.0 atp_m + hco3_m + nh4_m --> 2.0 adp_m + cbp_m + 2.0 h_m + pi_m	6.3.4.16	468.502	0		R255_num1
R256	0	glu__L_c + h2o_c + nad_c --> akg_c + h_c + nadh_c + nh4_c	1.4.1.2	945.419	0		R256	0	glu__L_c + h2o_c + nad_c --> akg_c + h_c + nadh_c + nh4_c	1.4.1.2	945.419	0		R256	0	glu__L_c + h2o_c + nad_c --> akg_c + h_c + nadh_c + nh4_c	1.4.1.2	945.419	0		R256	0	glu__L_c + h2o_c + nad_c --> akg_c + h_c + nadh_c + nh4_c	1.4.1.2	945.419	0		R256	0	glu__L_c + h2o_c + nad_c --> akg_c + h_c + nadh_c + nh4_c	1.4.1.2	945.419	0		R256	0	glu__L_c + h2o_c + nad_c --> akg_c + h_c + nadh_c + nh4_c	1.4.1.2	945.419	0		R256	0	glu__L_c + h2o_c + nad_c --> akg_c + h_c + nadh_c + nh4_c	1.4.1.2	945.419	0		R256
R257	0	arg__L_c + h2o_c --> orn__L_c + urea_c	3.5.3.1	9534.37	0		R257	0	arg__L_c + h2o_c --> orn__L_c + urea_c	3.5.3.1	9534.37	0		R257	-5.69913e-18	arg__L_c + h2o_c --> orn__L_c + urea_c	3.5.3.1	9534.37	-5.97746e-22		R257	-7.88861e-31	arg__L_c + h2o_c --> orn__L_c + urea_c	3.5.3.1	9534.37	-8.27386e-35		R257	0	arg__L_c + h2o_c --> orn__L_c + urea_c	3.5.3.1	9534.37	0		R257	0	arg__L_c + h2o_c --> orn__L_c + urea_c	3.5.3.1	9534.37	0		R257	0	arg__L_c + h2o_c --> orn__L_c + urea_c	3.5.3.1	9534.37	0		R257
R258	0	arg__L_m + h2o_m --> orn_m + urea_m	3.5.3.1	9534.37	0		R258	0	arg__L_m + h2o_m --> orn_m + urea_m	3.5.3.1	9534.37	0		R258	0	arg__L_m + h2o_m --> orn_m + urea_m	3.5.3.1	9534.37	0		R258	0	arg__L_m + h2o_m --> orn_m + urea_m	3.5.3.1	9534.37	0		R258	0	arg__L_m + h2o_m --> orn_m + urea_m	3.5.3.1	9534.37	0		R258	0	arg__L_m + h2o_m --> orn_m + urea_m	3.5.3.1	9534.37	0		R258	0	arg__L_m + h2o_m --> orn_m + urea_m	3.5.3.1	9534.37	0		R258
R259_num1	0	atp_c + co2_c + h2o_c + urea_c --> adp_c + allphn_c + 2.0 h_c + pi_c	6.3.4.6	479.807	0		R259_num1	0	atp_c + co2_c + h2o_c + urea_c --> adp_c + allphn_c + 2.0 h_c + pi_c	6.3.4.6	479.807	0		R259_num1	0	atp_c + co2_c + h2o_c + urea_c --> adp_c + allphn_c + 2.0 h_c + pi_c	6.3.4.6	479.807	0		R259_num1	0	atp_c + co2_c + h2o_c + urea_c --> adp_c + allphn_c + 2.0 h_c + pi_c	6.3.4.6	479.807	0		R259_num1	0	atp_c + co2_c + h2o_c + urea_c --> adp_c + allphn_c + 2.0 h_c + pi_c	6.3.4.6	479.807	0		R259_num1	0	atp_c + co2_c + h2o_c + urea_c --> adp_c + allphn_c + 2.0 h_c + pi_c	6.3.4.6	479.807	0		R259_num1	0	atp_c + co2_c + h2o_c + urea_c --> adp_c + allphn_c + 2.0 h_c + pi_c	6.3.4.6	479.807	0		R259_num1
R260_num1	0	allphn_c + h2o_c + 3.0 h_c --> 2.0 co2_c + 2.0 nh4_c	3.5.1.54	573.637	0		R260_num1	0	allphn_c + h2o_c + 3.0 h_c --> 2.0 co2_c + 2.0 nh4_c	3.5.1.54	573.637	0		R260_num1	0	allphn_c + h2o_c + 3.0 h_c --> 2.0 co2_c + 2.0 nh4_c	3.5.1.54	573.637	0		R260_num1	0	allphn_c + h2o_c + 3.0 h_c --> 2.0 co2_c + 2.0 nh4_c	3.5.1.54	573.637	0		R260_num1	0	allphn_c + h2o_c + 3.0 h_c --> 2.0 co2_c + 2.0 nh4_c	3.5.1.54	573.637	0		R260_num1	0	allphn_c + h2o_c + 3.0 h_c --> 2.0 co2_c + 2.0 nh4_c	3.5.1.54	573.637	0		R260_num1	0	allphn_c + h2o_c + 3.0 h_c --> 2.0 co2_c + 2.0 nh4_c	3.5.1.54	573.637	0		R260_num1
R261_num1	0	h2o_c + 2.0 h_c + urea_c --> co2_c + 2.0 nh4_c	3.5.1.5	1142.57	0		R261_num1	0	h2o_c + 2.0 h_c + urea_c --> co2_c + 2.0 nh4_c	3.5.1.5	1142.57	0		R261_num1	0	h2o_c + 2.0 h_c + urea_c --> co2_c + 2.0 nh4_c	3.5.1.5	1142.57	0		R261_num1	0	h2o_c + 2.0 h_c + urea_c --> co2_c + 2.0 nh4_c	3.5.1.5	1142.57	0		R261_num1	0	h2o_c + 2.0 h_c + urea_c --> co2_c + 2.0 nh4_c	3.5.1.5	1142.57	0		R261_num1	0	h2o_c + 2.0 h_c + urea_c --> co2_c + 2.0 nh4_c	3.5.1.5	1142.57	0		R261_num1	0	h2o_c + 2.0 h_c + urea_c --> co2_c + 2.0 nh4_c	3.5.1.5	1142.57	0		R261_num1
R262_num1	0	Dara14lac_c + h_c + nadph_c --> arab__D_c + nadp_c	1.1.1.117				R262_num1	0	Dara14lac_c + h_c + nadph_c --> arab__D_c + nadp_c	1.1.1.117				R262_num1	0	Dara14lac_c + h_c + nadph_c --> arab__D_c + nadp_c	1.1.1.117				R262_num1	0	Dara14lac_c + h_c + nadph_c --> arab__D_c + nadp_c	1.1.1.117				R262_num1	0	Dara14lac_c + h_c + nadph_c --> arab__D_c + nadp_c	1.1.1.117				R262_num1	0	Dara14lac_c + h_c + nadph_c --> arab__D_c + nadp_c	1.1.1.117				R262_num1	0	Dara14lac_c + h_c + nadph_c --> arab__D_c + nadp_c	1.1.1.117				R262_num1
R263	0	Dara14lac_c + o2_c --> DARABL_c + h2o2_c	1.1.3.37	1973.99	0		R263	0	Dara14lac_c + o2_c --> DARABL_c + h2o2_c	1.1.3.37	1973.99	0		R263	0	Dara14lac_c + o2_c --> DARABL_c + h2o2_c	1.1.3.37	1973.99	0		R263	0	Dara14lac_c + o2_c --> DARABL_c + h2o2_c	1.1.3.37	1973.99	0		R263	0	Dara14lac_c + o2_c --> DARABL_c + h2o2_c	1.1.3.37	1973.99	0		R263	0	Dara14lac_c + o2_c --> DARABL_c + h2o2_c	1.1.3.37	1973.99	0		R263	0	Dara14lac_c + o2_c --> DARABL_c + h2o2_c	1.1.3.37	1973.99	0		R263
R264_num1	0	CPDQT_4_c + h2o_c --> L_GALACTOPYRANOSE_c + pi_c	3.1.3.93				R264_num1	0	CPDQT_4_c + h2o_c --> L_GALACTOPYRANOSE_c + pi_c	3.1.3.93				R264_num1	0	CPDQT_4_c + h2o_c --> L_GALACTOPYRANOSE_c + pi_c	3.1.3.93				R264_num1	0	CPDQT_4_c + h2o_c --> L_GALACTOPYRANOSE_c + pi_c	3.1.3.93				R264_num1	0	CPDQT_4_c + h2o_c --> L_GALACTOPYRANOSE_c + pi_c	3.1.3.93				R264_num1	0	CPDQT_4_c + h2o_c --> L_GALACTOPYRANOSE_c + pi_c	3.1.3.93				R264_num1	0	CPDQT_4_c + h2o_c --> L_GALACTOPYRANOSE_c + pi_c	3.1.3.93				R264_num1
R265	0	inost_c + o2_c --> glcur_c + h2o_c + h_c	1.13.99.1	591.546	0		R265	0	inost_c + o2_c --> glcur_c + h2o_c + h_c	1.13.99.1	591.546	0		R265	3.29707e-18	inost_c + o2_c --> glcur_c + h2o_c + h_c	1.13.99.1	591.546	5.57365e-21		R265	0	inost_c + o2_c --> glcur_c + h2o_c + h_c	1.13.99.1	591.546	0		R265	0	inost_c + o2_c --> glcur_c + h2o_c + h_c	1.13.99.1	591.546	0		R265	0	inost_c + o2_c --> glcur_c + h2o_c + h_c	1.13.99.1	591.546	0		R265	0	inost_c + o2_c --> glcur_c + h2o_c + h_c	1.13.99.1	591.546	0		R265
R266	0	2.0 DONOR_H2_c + echin_c + 2.0 o2_c --> CPD_7851_c + 3.0 h2o_c	1.14.99.63				R266	0	2.0 DONOR_H2_c + echin_c + 2.0 o2_c --> CPD_7851_c + 3.0 h2o_c	1.14.99.63				R266	0	2.0 DONOR_H2_c + echin_c + 2.0 o2_c --> CPD_7851_c + 3.0 h2o_c	1.14.99.63				R266	0	2.0 DONOR_H2_c + echin_c + 2.0 o2_c --> CPD_7851_c + 3.0 h2o_c	1.14.99.63				R266	0	2.0 DONOR_H2_c + echin_c + 2.0 o2_c --> CPD_7851_c + 3.0 h2o_c	1.14.99.63				R266	0	2.0 DONOR_H2_c + echin_c + 2.0 o2_c --> CPD_7851_c + 3.0 h2o_c	1.14.99.63				R266	0	2.0 DONOR_H2_c + echin_c + 2.0 o2_c --> CPD_7851_c + 3.0 h2o_c	1.14.99.63				R266
R267	0	2.0 DONOR_H2_c + caro_c + 2.0 o2_c --> echin_c + 3.0 h2o_c	1.14.99.63				R267	0	2.0 DONOR_H2_c + caro_c + 2.0 o2_c --> echin_c + 3.0 h2o_c	1.14.99.63				R267	0	2.0 DONOR_H2_c + caro_c + 2.0 o2_c --> echin_c + 3.0 h2o_c	1.14.99.63				R267	0	2.0 DONOR_H2_c + caro_c + 2.0 o2_c --> echin_c + 3.0 h2o_c	1.14.99.63				R267	0	2.0 DONOR_H2_c + caro_c + 2.0 o2_c --> echin_c + 3.0 h2o_c	1.14.99.63				R267	0	2.0 DONOR_H2_c + caro_c + 2.0 o2_c --> echin_c + 3.0 h2o_c	1.14.99.63				R267	0	2.0 DONOR_H2_c + caro_c + 2.0 o2_c --> echin_c + 3.0 h2o_c	1.14.99.63				R267
R268	0	2.0 DONOR_H2_m + echin_m + 2.0 o2_m --> CPD_7851_m + 3.0 h2o_m	1.14.99.63				R268	0	2.0 DONOR_H2_m + echin_m + 2.0 o2_m --> CPD_7851_m + 3.0 h2o_m	1.14.99.63				R268	0	2.0 DONOR_H2_m + echin_m + 2.0 o2_m --> CPD_7851_m + 3.0 h2o_m	1.14.99.63				R268	0	2.0 DONOR_H2_m + echin_m + 2.0 o2_m --> CPD_7851_m + 3.0 h2o_m	1.14.99.63				R268	0	2.0 DONOR_H2_m + echin_m + 2.0 o2_m --> CPD_7851_m + 3.0 h2o_m	1.14.99.63				R268	0	2.0 DONOR_H2_m + echin_m + 2.0 o2_m --> CPD_7851_m + 3.0 h2o_m	1.14.99.63				R268	0	2.0 DONOR_H2_m + echin_m + 2.0 o2_m --> CPD_7851_m + 3.0 h2o_m	1.14.99.63				R268
R269	0	2.0 DONOR_H2_m + caro_m + 2.0 o2_m --> echin_m + 3.0 h2o_m	1.14.99.63				R269	0	2.0 DONOR_H2_m + caro_m + 2.0 o2_m --> echin_m + 3.0 h2o_m	1.14.99.63				R269	0	2.0 DONOR_H2_m + caro_m + 2.0 o2_m --> echin_m + 3.0 h2o_m	1.14.99.63				R269	0	2.0 DONOR_H2_m + caro_m + 2.0 o2_m --> echin_m + 3.0 h2o_m	1.14.99.63				R269	0	2.0 DONOR_H2_m + caro_m + 2.0 o2_m --> echin_m + 3.0 h2o_m	1.14.99.63				R269	0	2.0 DONOR_H2_m + caro_m + 2.0 o2_m --> echin_m + 3.0 h2o_m	1.14.99.63				R269	0	2.0 DONOR_H2_m + caro_m + 2.0 o2_m --> echin_m + 3.0 h2o_m	1.14.99.63				R269
R270	0	CPD_7849_c + 2.0 REDUCED_FERREDOXINS_c + 2.0 h_c + o2_c --> CPD_7847_c + 2.0 OXIDIZED_FERREDOXINS_c + h2o_c		590.438	0		R270	0	CPD_7849_c + 2.0 REDUCED_FERREDOXINS_c + 2.0 h_c + o2_c --> CPD_7847_c + 2.0 OXIDIZED_FERREDOXINS_c + h2o_c		590.438	0		R270	0	CPD_7849_c + 2.0 REDUCED_FERREDOXINS_c + 2.0 h_c + o2_c --> CPD_7847_c + 2.0 OXIDIZED_FERREDOXINS_c + h2o_c		590.438	0		R270	0	CPD_7849_c + 2.0 REDUCED_FERREDOXINS_c + 2.0 h_c + o2_c --> CPD_7847_c + 2.0 OXIDIZED_FERREDOXINS_c + h2o_c		590.438	0		R270	0	CPD_7849_c + 2.0 REDUCED_FERREDOXINS_c + 2.0 h_c + o2_c --> CPD_7847_c + 2.0 OXIDIZED_FERREDOXINS_c + h2o_c		590.438	0		R270	0	CPD_7849_c + 2.0 REDUCED_FERREDOXINS_c + 2.0 h_c + o2_c --> CPD_7847_c + 2.0 OXIDIZED_FERREDOXINS_c + h2o_c		590.438	0		R270	0	CPD_7849_c + 2.0 REDUCED_FERREDOXINS_c + 2.0 h_c + o2_c --> CPD_7847_c + 2.0 OXIDIZED_FERREDOXINS_c + h2o_c		590.438	0		R270
R271	0	CPD_7851_c + 2.0 REDUCED_FERREDOXINS_c + 2.0 h_c + o2_c --> CPD_7849_c + 2.0 OXIDIZED_FERREDOXINS_c + h2o_c		590.438	0		R271	0	CPD_7851_c + 2.0 REDUCED_FERREDOXINS_c + 2.0 h_c + o2_c --> CPD_7849_c + 2.0 OXIDIZED_FERREDOXINS_c + h2o_c		590.438	0		R271	0	CPD_7851_c + 2.0 REDUCED_FERREDOXINS_c + 2.0 h_c + o2_c --> CPD_7849_c + 2.0 OXIDIZED_FERREDOXINS_c + h2o_c		590.438	0		R271	0	CPD_7851_c + 2.0 REDUCED_FERREDOXINS_c + 2.0 h_c + o2_c --> CPD_7849_c + 2.0 OXIDIZED_FERREDOXINS_c + h2o_c		590.438	0		R271	0	CPD_7851_c + 2.0 REDUCED_FERREDOXINS_c + 2.0 h_c + o2_c --> CPD_7849_c + 2.0 OXIDIZED_FERREDOXINS_c + h2o_c		590.438	0		R271	0	CPD_7851_c + 2.0 REDUCED_FERREDOXINS_c + 2.0 h_c + o2_c --> CPD_7849_c + 2.0 OXIDIZED_FERREDOXINS_c + h2o_c		590.438	0		R271	0	CPD_7851_c + 2.0 REDUCED_FERREDOXINS_c + 2.0 h_c + o2_c --> CPD_7849_c + 2.0 OXIDIZED_FERREDOXINS_c + h2o_c		590.438	0		R271
R272	0	CPD_7849_m + 2.0 REDUCED_FERREDOXINS_m + 2.0 h_m + o2_m --> CPD_7847_m + 2.0 OXIDIZED_FERREDOXINS_m + h2o_m		511.701	0		R272	0	CPD_7849_m + 2.0 REDUCED_FERREDOXINS_m + 2.0 h_m + o2_m --> CPD_7847_m + 2.0 OXIDIZED_FERREDOXINS_m + h2o_m		511.701	0		R272	0	CPD_7849_m + 2.0 REDUCED_FERREDOXINS_m + 2.0 h_m + o2_m --> CPD_7847_m + 2.0 OXIDIZED_FERREDOXINS_m + h2o_m		511.701	0		R272	0	CPD_7849_m + 2.0 REDUCED_FERREDOXINS_m + 2.0 h_m + o2_m --> CPD_7847_m + 2.0 OXIDIZED_FERREDOXINS_m + h2o_m		511.701	0		R272	0	CPD_7849_m + 2.0 REDUCED_FERREDOXINS_m + 2.0 h_m + o2_m --> CPD_7847_m + 2.0 OXIDIZED_FERREDOXINS_m + h2o_m		511.701	0		R272	0	CPD_7849_m + 2.0 REDUCED_FERREDOXINS_m + 2.0 h_m + o2_m --> CPD_7847_m + 2.0 OXIDIZED_FERREDOXINS_m + h2o_m		511.701	0		R272	0	CPD_7849_m + 2.0 REDUCED_FERREDOXINS_m + 2.0 h_m + o2_m --> CPD_7847_m + 2.0 OXIDIZED_FERREDOXINS_m + h2o_m		511.701	0		R272
R273	0	CPD_7851_m + 2.0 REDUCED_FERREDOXINS_m + 2.0 h_m + o2_m --> CPD_7849_m + 2.0 OXIDIZED_FERREDOXINS_m + h2o_m		511.701	0		R273	0	CPD_7851_m + 2.0 REDUCED_FERREDOXINS_m + 2.0 h_m + o2_m --> CPD_7849_m + 2.0 OXIDIZED_FERREDOXINS_m + h2o_m		511.701	0		R273	0	CPD_7851_m + 2.0 REDUCED_FERREDOXINS_m + 2.0 h_m + o2_m --> CPD_7849_m + 2.0 OXIDIZED_FERREDOXINS_m + h2o_m		511.701	0		R273	0	CPD_7851_m + 2.0 REDUCED_FERREDOXINS_m + 2.0 h_m + o2_m --> CPD_7849_m + 2.0 OXIDIZED_FERREDOXINS_m + h2o_m		511.701	0		R273	0	CPD_7851_m + 2.0 REDUCED_FERREDOXINS_m + 2.0 h_m + o2_m --> CPD_7849_m + 2.0 OXIDIZED_FERREDOXINS_m + h2o_m		511.701	0		R273	0	CPD_7851_m + 2.0 REDUCED_FERREDOXINS_m + 2.0 h_m + o2_m --> CPD_7849_m + 2.0 OXIDIZED_FERREDOXINS_m + h2o_m		511.701	0		R273	0	CPD_7851_m + 2.0 REDUCED_FERREDOXINS_m + 2.0 h_m + o2_m --> CPD_7849_m + 2.0 OXIDIZED_FERREDOXINS_m + h2o_m		511.701	0		R273
R274	0	urea_c --> CPD_657_c + h2o_c	4.2.1.69	5339.03	0		R274	0	urea_c --> CPD_657_c + h2o_c	4.2.1.69	5339.03	0		R274	0	urea_c --> CPD_657_c + h2o_c	4.2.1.69	5339.03	0		R274	0	urea_c --> CPD_657_c + h2o_c	4.2.1.69	5339.03	0		R274	0	urea_c --> CPD_657_c + h2o_c	4.2.1.69	5339.03	0		R274	0	urea_c --> CPD_657_c + h2o_c	4.2.1.69	5339.03	0		R274	0	urea_c --> CPD_657_c + h2o_c	4.2.1.69	5339.03	0		R274
R275	0	CPD_809_m + h2o_m --> allphn_m + nh4_m	3.5.1.84	1512.33	0		R275	0	CPD_809_m + h2o_m --> allphn_m + nh4_m	3.5.1.84	1512.33	0		R275	0	CPD_809_m + h2o_m --> allphn_m + nh4_m	3.5.1.84	1512.33	0		R275	0	CPD_809_m + h2o_m --> allphn_m + nh4_m	3.5.1.84	1512.33	0		R275	0	CPD_809_m + h2o_m --> allphn_m + nh4_m	3.5.1.84	1512.33	0		R275	0	CPD_809_m + h2o_m --> allphn_m + nh4_m	3.5.1.84	1512.33	0		R275	0	CPD_809_m + h2o_m --> allphn_m + nh4_m	3.5.1.84	1512.33	0		R275
R276_num1	0	RES_c + h_c + nadph_c + o2_c --> BTOL_c + h2o_c + nadp_c	1.14.13.219				R276_num1	0	RES_c + h_c + nadph_c + o2_c --> BTOL_c + h2o_c + nadp_c	1.14.13.219				R276_num1	0	RES_c + h_c + nadph_c + o2_c --> BTOL_c + h2o_c + nadp_c	1.14.13.219				R276_num1	0	RES_c + h_c + nadph_c + o2_c --> BTOL_c + h2o_c + nadp_c	1.14.13.219				R276_num1	0	RES_c + h_c + nadph_c + o2_c --> BTOL_c + h2o_c + nadp_c	1.14.13.219				R276_num1	0	RES_c + h_c + nadph_c + o2_c --> BTOL_c + h2o_c + nadp_c	1.14.13.219				R276_num1	0	RES_c + h_c + nadph_c + o2_c --> BTOL_c + h2o_c + nadp_c	1.14.13.219				R276_num1
R277_num1	0	catechol_c + o2_c --> ccmuac_c + 2.0 h_c	1.13.11.1	1298.95	0		R277_num1	0	catechol_c + o2_c --> ccmuac_c + 2.0 h_c	1.13.11.1	1298.95	0		R277_num1	0	catechol_c + o2_c --> ccmuac_c + 2.0 h_c	1.13.11.1	1298.95	0		R277_num1	0	catechol_c + o2_c --> ccmuac_c + 2.0 h_c	1.13.11.1	1298.95	0		R277_num1	0	catechol_c + o2_c --> ccmuac_c + 2.0 h_c	1.13.11.1	1298.95	0		R277_num1	0	catechol_c + o2_c --> ccmuac_c + 2.0 h_c	1.13.11.1	1298.95	0		R277_num1	0	catechol_c + o2_c --> ccmuac_c + 2.0 h_c	1.13.11.1	1298.95	0		R277_num1
R278	0	5odhf2a_c + h2o_c --> 3oxoadp_c + h_c	3.1.1.24				R278	0	5odhf2a_c + h2o_c --> 3oxoadp_c + h_c	3.1.1.24				R278	0	5odhf2a_c + h2o_c --> 3oxoadp_c + h_c	3.1.1.24				R278	0	5odhf2a_c + h2o_c --> 3oxoadp_c + h_c	3.1.1.24				R278	0	5odhf2a_c + h2o_c --> 3oxoadp_c + h_c	3.1.1.24				R278	0	5odhf2a_c + h2o_c --> 3oxoadp_c + h_c	3.1.1.24				R278	0	5odhf2a_c + h2o_c --> 3oxoadp_c + h_c	3.1.1.24				R278
R279	0	4hbz_c + h_c + nadph_c + o2_c --> 34dhbz_c + h2o_c + nadp_c	1.14.13.33				R279	0	4hbz_c + h_c + nadph_c + o2_c --> 34dhbz_c + h2o_c + nadp_c	1.14.13.33				R279	0	4hbz_c + h_c + nadph_c + o2_c --> 34dhbz_c + h2o_c + nadp_c	1.14.13.33				R279	0	4hbz_c + h_c + nadph_c + o2_c --> 34dhbz_c + h2o_c + nadp_c	1.14.13.33				R279	0	4hbz_c + h_c + nadph_c + o2_c --> 34dhbz_c + h2o_c + nadp_c	1.14.13.33				R279	0	4hbz_c + h_c + nadph_c + o2_c --> 34dhbz_c + h2o_c + nadp_c	1.14.13.33				R279	0	4hbz_c + h_c + nadph_c + o2_c --> 34dhbz_c + h2o_c + nadp_c	1.14.13.33				R279
R280_num1	0	bz_c + h_c + nadph_c + o2_c --> 4hbz_c + h2o_c + nadp_c	1.14.14.92	139.41	0		R280_num1	0	bz_c + h_c + nadph_c + o2_c --> 4hbz_c + h2o_c + nadp_c	1.14.14.92	139.41	0		R280_num1	0	bz_c + h_c + nadph_c + o2_c --> 4hbz_c + h2o_c + nadp_c	1.14.14.92	139.41	0		R280_num1	0	bz_c + h_c + nadph_c + o2_c --> 4hbz_c + h2o_c + nadp_c	1.14.14.92	139.41	0		R280_num1	0	bz_c + h_c + nadph_c + o2_c --> 4hbz_c + h2o_c + nadp_c	1.14.14.92	139.41	0		R280_num1	0	bz_c + h_c + nadph_c + o2_c --> 4hbz_c + h2o_c + nadp_c	1.14.14.92	139.41	0		R280_num1	0	bz_c + h_c + nadph_c + o2_c --> 4hbz_c + h2o_c + nadp_c	1.14.14.92	139.41	0		R280_num1
R281	0	23dhb_c + h_c --> catechol_c + co2_c	4.1.1.46	1255.75	0		R281	0	23dhb_c + h_c --> catechol_c + co2_c	4.1.1.46	1255.75	0		R281	0	23dhb_c + h_c --> catechol_c + co2_c	4.1.1.46	1255.75	0		R281	0	23dhb_c + h_c --> catechol_c + co2_c	4.1.1.46	1255.75	0		R281	0	23dhb_c + h_c --> catechol_c + co2_c	4.1.1.46	1255.75	0		R281	0	23dhb_c + h_c --> catechol_c + co2_c	4.1.1.46	1255.75	0		R281	0	23dhb_c + h_c --> catechol_c + co2_c	4.1.1.46	1255.75	0		R281
R282_num1	-2.91401e-17	13DMPP_c + h2o_c + o2_c --> aproa_c + h2o2_c + nh4_c	1.4.3.21,1.4.3.22	1282.67	-2.27183e-20		R282_num1	0	13DMPP_c + h2o_c + o2_c --> aproa_c + h2o2_c + nh4_c	1.4.3.21,1.4.3.22	1282.67	0		R282_num1	0	13DMPP_c + h2o_c + o2_c --> aproa_c + h2o2_c + nh4_c	1.4.3.21,1.4.3.22	1282.67	0		R282_num1	6.68835e-15	13DMPP_c + h2o_c + o2_c --> aproa_c + h2o2_c + nh4_c	1.4.3.21,1.4.3.22	1282.67	5.21439e-18		R282_num1	0	13DMPP_c + h2o_c + o2_c --> aproa_c + h2o2_c + nh4_c	1.4.3.21,1.4.3.22	1282.67	0		R282_num1	0	13DMPP_c + h2o_c + o2_c --> aproa_c + h2o2_c + nh4_c	1.4.3.21,1.4.3.22	1282.67	0		R282_num1	0	13DMPP_c + h2o_c + o2_c --> aproa_c + h2o2_c + nh4_c	1.4.3.21,1.4.3.22	1282.67	0		R282_num1
R283_num1	0	aproa_c + h2o_c + nad_c --> ala_B_c + 2.0 h_c + nadh_c	1.2.1.3,1.2.1.5,1.2.1.19	1324.83	0		R283_num1	0	aproa_c + h2o_c + nad_c --> ala_B_c + 2.0 h_c + nadh_c	1.2.1.3,1.2.1.5,1.2.1.19	1324.83	0		R283_num1	0	aproa_c + h2o_c + nad_c --> ala_B_c + 2.0 h_c + nadh_c	1.2.1.3,1.2.1.5,1.2.1.19	1324.83	0		R283_num1	0	aproa_c + h2o_c + nad_c --> ala_B_c + 2.0 h_c + nadh_c	1.2.1.3,1.2.1.5,1.2.1.19	1324.83	0		R283_num1	0	aproa_c + h2o_c + nad_c --> ala_B_c + 2.0 h_c + nadh_c	1.2.1.3,1.2.1.5,1.2.1.19	1324.83	0		R283_num1	0	aproa_c + h2o_c + nad_c --> ala_B_c + 2.0 h_c + nadh_c	1.2.1.3,1.2.1.5,1.2.1.19	1324.83	0		R283_num1	0	aproa_c + h2o_c + nad_c --> ala_B_c + 2.0 h_c + nadh_c	1.2.1.3,1.2.1.5,1.2.1.19	1324.83	0		R283_num1
R284_num1	-1.2326e-32	aproa_c + h2o_c + nadp_c --> ala_B_c + 2.0 h_c + nadph_c	1.2.1.3,1.2.1.5,1.2.1.19	1117.12	-1.10336e-35		R284_num1	0	aproa_c + h2o_c + nadp_c --> ala_B_c + 2.0 h_c + nadph_c	1.2.1.3,1.2.1.5,1.2.1.19	1117.12	0		R284_num1	0	aproa_c + h2o_c + nadp_c --> ala_B_c + 2.0 h_c + nadph_c	1.2.1.3,1.2.1.5,1.2.1.19	1117.12	0		R284_num1	0	aproa_c + h2o_c + nadp_c --> ala_B_c + 2.0 h_c + nadph_c	1.2.1.3,1.2.1.5,1.2.1.19	1117.12	0		R284_num1	0	aproa_c + h2o_c + nadp_c --> ala_B_c + 2.0 h_c + nadph_c	1.2.1.3,1.2.1.5,1.2.1.19	1117.12	0		R284_num1	0	aproa_c + h2o_c + nadp_c --> ala_B_c + 2.0 h_c + nadph_c	1.2.1.3,1.2.1.5,1.2.1.19	1117.12	0		R284_num1	0	aproa_c + h2o_c + nadp_c --> ala_B_c + 2.0 h_c + nadph_c	1.2.1.3,1.2.1.5,1.2.1.19	1117.12	0		R284_num1
R285	0	coa_m + msa_m + nad_m --> accoa_m + co2_m + nadh_m	1.2.1.18,1.2.1.27	73.5312	0		R285	0	coa_m + msa_m + nad_m --> accoa_m + co2_m + nadh_m	1.2.1.18,1.2.1.27	73.5312	0		R285	0	coa_m + msa_m + nad_m --> accoa_m + co2_m + nadh_m	1.2.1.18,1.2.1.27	73.5312	0		R285	0	coa_m + msa_m + nad_m --> accoa_m + co2_m + nadh_m	1.2.1.18,1.2.1.27	73.5312	0		R285	0	coa_m + msa_m + nad_m --> accoa_m + co2_m + nadh_m	1.2.1.18,1.2.1.27	73.5312	0		R285	0	coa_m + msa_m + nad_m --> accoa_m + co2_m + nadh_m	1.2.1.18,1.2.1.27	73.5312	0		R285	0	coa_m + msa_m + nad_m --> accoa_m + co2_m + nadh_m	1.2.1.18,1.2.1.27	73.5312	0		R285
R286	-9.65148e-16	coa_m + msa_m + nadp_m --> accoa_m + co2_m + nadph_m	1.2.1.18				R286	0	coa_m + msa_m + nadp_m --> accoa_m + co2_m + nadph_m	1.2.1.18				R286	-3.26281e-16	coa_m + msa_m + nadp_m --> accoa_m + co2_m + nadph_m	1.2.1.18				R286	7.08512e-16	coa_m + msa_m + nadp_m --> accoa_m + co2_m + nadph_m	1.2.1.18				R286	-4.88559e-17	coa_m + msa_m + nadp_m --> accoa_m + co2_m + nadph_m	1.2.1.18				R286	-2.56686e-16	coa_m + msa_m + nadp_m --> accoa_m + co2_m + nadph_m	1.2.1.18				R286	0	coa_m + msa_m + nadp_m --> accoa_m + co2_m + nadph_m	1.2.1.18				R286
R287	0	ala_B_c + atp_c + pant__R_c --> amp_c + h_c + pnto__R_c + ppi_c	6.3.2.1	288.845	0		R287	0.480501	ala_B_c + atp_c + pant__R_c --> amp_c + h_c + pnto__R_c + ppi_c	6.3.2.1	288.845	0.00166352		R287	0	ala_B_c + atp_c + pant__R_c --> amp_c + h_c + pnto__R_c + ppi_c	6.3.2.1	288.845	0		R287	0	ala_B_c + atp_c + pant__R_c --> amp_c + h_c + pnto__R_c + ppi_c	6.3.2.1	288.845	0		R287	0	ala_B_c + atp_c + pant__R_c --> amp_c + h_c + pnto__R_c + ppi_c	6.3.2.1	288.845	0		R287	0	ala_B_c + atp_c + pant__R_c --> amp_c + h_c + pnto__R_c + ppi_c	6.3.2.1	288.845	0		R287	0	ala_B_c + atp_c + pant__R_c --> amp_c + h_c + pnto__R_c + ppi_c	6.3.2.1	288.845	0		R287
R288_num1	0	asp__L_c + h_c --> ala_B_c + co2_c	4.1.1.11,4.1.1.15	77.2213	0		R288_num1	0	asp__L_c + h_c --> ala_B_c + co2_c	4.1.1.11,4.1.1.15	77.2213	0		R288_num1	0	asp__L_c + h_c --> ala_B_c + co2_c	4.1.1.11,4.1.1.15	77.2213	0		R288_num1	0	asp__L_c + h_c --> ala_B_c + co2_c	4.1.1.11,4.1.1.15	77.2213	0		R288_num1	0	asp__L_c + h_c --> ala_B_c + co2_c	4.1.1.11,4.1.1.15	77.2213	0		R288_num1	0	asp__L_c + h_c --> ala_B_c + co2_c	4.1.1.11,4.1.1.15	77.2213	0		R288_num1	0	asp__L_c + h_c --> ala_B_c + co2_c	4.1.1.11,4.1.1.15	77.2213	0		R288_num1
R289	0	3hpcoa_m + h2o_m --> 3hpp_m + coa_m + h_m	3.1.2.4	372.603	0		R289	0	3hpcoa_m + h2o_m --> 3hpp_m + coa_m + h_m	3.1.2.4	372.603	0		R289	0	3hpcoa_m + h2o_m --> 3hpp_m + coa_m + h_m	3.1.2.4	372.603	0		R289	0	3hpcoa_m + h2o_m --> 3hpp_m + coa_m + h_m	3.1.2.4	372.603	0		R289	0	3hpcoa_m + h2o_m --> 3hpp_m + coa_m + h_m	3.1.2.4	372.603	0		R289	0	3hpcoa_m + h2o_m --> 3hpp_m + coa_m + h_m	3.1.2.4	372.603	0		R289	0	3hpcoa_m + h2o_m --> 3hpp_m + coa_m + h_m	3.1.2.4	372.603	0		R289
R290	0	akg_c + ala_B_c --> glu__L_c + msa_c	2.6.1.19,2.6.1.55	965.566	0		R290	0	akg_c + ala_B_c --> glu__L_c + msa_c	2.6.1.19,2.6.1.55	965.566	0		R290	0	akg_c + ala_B_c --> glu__L_c + msa_c	2.6.1.19,2.6.1.55	965.566	0		R290	0	akg_c + ala_B_c --> glu__L_c + msa_c	2.6.1.19,2.6.1.55	965.566	0		R290	0	akg_c + ala_B_c --> glu__L_c + msa_c	2.6.1.19,2.6.1.55	965.566	0		R290	0	akg_c + ala_B_c --> glu__L_c + msa_c	2.6.1.19,2.6.1.55	965.566	0		R290	0	akg_c + ala_B_c --> glu__L_c + msa_c	2.6.1.19,2.6.1.55	965.566	0		R290
R291	-9.65148e-16	3hpp_m + nad_m --> h_m + msa_m + nadh_m	1.1.1.59	2607.52	-3.70141e-19		R291	0	3hpp_m + nad_m --> h_m + msa_m + nadh_m	1.1.1.59	2607.52	0		R291	-3.26281e-16	3hpp_m + nad_m --> h_m + msa_m + nadh_m	1.1.1.59	2607.52	-1.25131e-19		R291	7.08512e-16	3hpp_m + nad_m --> h_m + msa_m + nadh_m	1.1.1.59	2607.52	2.71719e-19		R291	-4.88559e-17	3hpp_m + nad_m --> h_m + msa_m + nadh_m	1.1.1.59	2607.52	-1.87366e-20		R291	-2.56686e-16	3hpp_m + nad_m --> h_m + msa_m + nadh_m	1.1.1.59	2607.52	-9.84409e-20		R291	0	3hpp_m + nad_m --> h_m + msa_m + nadh_m	1.1.1.59	2607.52	0		R291
R292_num1	0	h2o_m + prpncoa_m --> 3hpcoa_m	4.2.1.17,4.2.1.116,4.2.1.-	1670.57	0		R292_num1	0	h2o_m + prpncoa_m --> 3hpcoa_m	4.2.1.17,4.2.1.116,4.2.1.-	1670.57	0		R292_num1	0	h2o_m + prpncoa_m --> 3hpcoa_m	4.2.1.17,4.2.1.116,4.2.1.-	1670.57	0		R292_num1	0	h2o_m + prpncoa_m --> 3hpcoa_m	4.2.1.17,4.2.1.116,4.2.1.-	1670.57	0		R292_num1	0	h2o_m + prpncoa_m --> 3hpcoa_m	4.2.1.17,4.2.1.116,4.2.1.-	1670.57	0		R292_num1	0	h2o_m + prpncoa_m --> 3hpcoa_m	4.2.1.17,4.2.1.116,4.2.1.-	1670.57	0		R292_num1	0	h2o_m + prpncoa_m --> 3hpcoa_m	4.2.1.17,4.2.1.116,4.2.1.-	1670.57	0		R292_num1
R293	0	CPD_253_c --> CPD_8651_c + h2o_c + h_c					R293	0	CPD_253_c --> CPD_8651_c + h2o_c + h_c					R293	0	CPD_253_c --> CPD_8651_c + h2o_c + h_c					R293	0	CPD_253_c --> CPD_8651_c + h2o_c + h_c					R293	0	CPD_253_c --> CPD_8651_c + h2o_c + h_c					R293	0	CPD_253_c --> CPD_8651_c + h2o_c + h_c					R293	0	CPD_253_c --> CPD_8651_c + h2o_c + h_c					R293
R294	0	CPD_8651_c + CPD_8652_c + h_c --> CPD_8653_c + h2o_c					R294	0	CPD_8651_c + CPD_8652_c + h_c --> CPD_8653_c + h2o_c					R294	0	CPD_8651_c + CPD_8652_c + h_c --> CPD_8653_c + h2o_c					R294	0	CPD_8651_c + CPD_8652_c + h_c --> CPD_8653_c + h2o_c					R294	0	CPD_8651_c + CPD_8652_c + h_c --> CPD_8653_c + h2o_c					R294	0	CPD_8651_c + CPD_8652_c + h_c --> CPD_8653_c + h2o_c					R294	0	CPD_8651_c + CPD_8652_c + h_c --> CPD_8653_c + h2o_c					R294
R295	0	CPD_8651_c + tyr__L_c --> CPD_8670_c + h2o_c + h_c					R295	0	CPD_8651_c + tyr__L_c --> CPD_8670_c + h2o_c + h_c					R295	0	CPD_8651_c + tyr__L_c --> CPD_8670_c + h2o_c + h_c					R295	0	CPD_8651_c + tyr__L_c --> CPD_8670_c + h2o_c + h_c					R295	0	CPD_8651_c + tyr__L_c --> CPD_8670_c + h2o_c + h_c					R295	0	CPD_8651_c + tyr__L_c --> CPD_8670_c + h2o_c + h_c					R295	0	CPD_8651_c + tyr__L_c --> CPD_8670_c + h2o_c + h_c					R295
R296	0	CPD_8651_c + LDOPA_c --> CPD_8671_c + h2o_c + h_c					R296	0	CPD_8651_c + LDOPA_c --> CPD_8671_c + h2o_c + h_c					R296	0	CPD_8651_c + LDOPA_c --> CPD_8671_c + h2o_c + h_c					R296	0	CPD_8651_c + LDOPA_c --> CPD_8671_c + h2o_c + h_c					R296	0	CPD_8651_c + LDOPA_c --> CPD_8671_c + h2o_c + h_c					R296	0	CPD_8651_c + LDOPA_c --> CPD_8671_c + h2o_c + h_c					R296	0	CPD_8651_c + LDOPA_c --> CPD_8671_c + h2o_c + h_c					R296
R297	0	12.0 h_c + 6.0 mmcoa__S_c + 6.0 nadph_c + ppcoa_c --> CPD_428_c + 6.0 co2_c + 7.0 coa_c + h2o_c + 6.0 nadp_c	2.3.1.94				R297	0	12.0 h_c + 6.0 mmcoa__S_c + 6.0 nadph_c + ppcoa_c --> CPD_428_c + 6.0 co2_c + 7.0 coa_c + h2o_c + 6.0 nadp_c	2.3.1.94				R297	0	12.0 h_c + 6.0 mmcoa__S_c + 6.0 nadph_c + ppcoa_c --> CPD_428_c + 6.0 co2_c + 7.0 coa_c + h2o_c + 6.0 nadp_c	2.3.1.94				R297	0	12.0 h_c + 6.0 mmcoa__S_c + 6.0 nadph_c + ppcoa_c --> CPD_428_c + 6.0 co2_c + 7.0 coa_c + h2o_c + 6.0 nadp_c	2.3.1.94				R297	0	12.0 h_c + 6.0 mmcoa__S_c + 6.0 nadph_c + ppcoa_c --> CPD_428_c + 6.0 co2_c + 7.0 coa_c + h2o_c + 6.0 nadp_c	2.3.1.94				R297	0	12.0 h_c + 6.0 mmcoa__S_c + 6.0 nadph_c + ppcoa_c --> CPD_428_c + 6.0 co2_c + 7.0 coa_c + h2o_c + 6.0 nadp_c	2.3.1.94				R297	0	12.0 h_c + 6.0 mmcoa__S_c + 6.0 nadph_c + ppcoa_c --> CPD_428_c + 6.0 co2_c + 7.0 coa_c + h2o_c + 6.0 nadp_c	2.3.1.94				R297
R298_num1	0	accoa_c + 3.0 h_c + 3.0 malcoa_c + nadph_c --> CPD_637_c + 3.0 co2_c + 4.0 coa_c + h2o_c + nadp_c	2.3.1.165	252.404	0		R298_num1	0	accoa_c + 3.0 h_c + 3.0 malcoa_c + nadph_c --> CPD_637_c + 3.0 co2_c + 4.0 coa_c + h2o_c + nadp_c	2.3.1.165	252.404	0		R298_num1	0	accoa_c + 3.0 h_c + 3.0 malcoa_c + nadph_c --> CPD_637_c + 3.0 co2_c + 4.0 coa_c + h2o_c + nadp_c	2.3.1.165	252.404	0		R298_num1	0	accoa_c + 3.0 h_c + 3.0 malcoa_c + nadph_c --> CPD_637_c + 3.0 co2_c + 4.0 coa_c + h2o_c + nadp_c	2.3.1.165	252.404	0		R298_num1	0	accoa_c + 3.0 h_c + 3.0 malcoa_c + nadph_c --> CPD_637_c + 3.0 co2_c + 4.0 coa_c + h2o_c + nadp_c	2.3.1.165	252.404	0		R298_num1	0	accoa_c + 3.0 h_c + 3.0 malcoa_c + nadph_c --> CPD_637_c + 3.0 co2_c + 4.0 coa_c + h2o_c + nadp_c	2.3.1.165	252.404	0		R298_num1	0	accoa_c + 3.0 h_c + 3.0 malcoa_c + nadph_c --> CPD_637_c + 3.0 co2_c + 4.0 coa_c + h2o_c + nadp_c	2.3.1.165	252.404	0		R298_num1
R299	0	accoa_x + 3.0 h_x + 3.0 malcoa_x + nadph_x --> CPD_637_x + 3.0 co2_x + 4.0 coa_x + h2o_x + nadp_x	2.3.1.165	391.363	0		R299	0	accoa_x + 3.0 h_x + 3.0 malcoa_x + nadph_x --> CPD_637_x + 3.0 co2_x + 4.0 coa_x + h2o_x + nadp_x	2.3.1.165	391.363	0		R299	0	accoa_x + 3.0 h_x + 3.0 malcoa_x + nadph_x --> CPD_637_x + 3.0 co2_x + 4.0 coa_x + h2o_x + nadp_x	2.3.1.165	391.363	0		R299	0	accoa_x + 3.0 h_x + 3.0 malcoa_x + nadph_x --> CPD_637_x + 3.0 co2_x + 4.0 coa_x + h2o_x + nadp_x	2.3.1.165	391.363	0		R299	0	accoa_x + 3.0 h_x + 3.0 malcoa_x + nadph_x --> CPD_637_x + 3.0 co2_x + 4.0 coa_x + h2o_x + nadp_x	2.3.1.165	391.363	0		R299	0	accoa_x + 3.0 h_x + 3.0 malcoa_x + nadph_x --> CPD_637_x + 3.0 co2_x + 4.0 coa_x + h2o_x + nadp_x	2.3.1.165	391.363	0		R299	0	accoa_x + 3.0 h_x + 3.0 malcoa_x + nadph_x --> CPD_637_x + 3.0 co2_x + 4.0 coa_x + h2o_x + nadp_x	2.3.1.165	391.363	0		R299
R300	0	C190ACP_c + h_c + nadph_c + o2_c --> C191ACP_c + 2.0 h2o_c + nadp_c	1.14.19.1	382.482	0		R300	0	C190ACP_c + h_c + nadph_c + o2_c --> C191ACP_c + 2.0 h2o_c + nadp_c	1.14.19.1	382.482	0		R300	0	C190ACP_c + h_c + nadph_c + o2_c --> C191ACP_c + 2.0 h2o_c + nadp_c	1.14.19.1	382.482	0		R300	0	C190ACP_c + h_c + nadph_c + o2_c --> C191ACP_c + 2.0 h2o_c + nadp_c	1.14.19.1	382.482	0		R300	0	C190ACP_c + h_c + nadph_c + o2_c --> C191ACP_c + 2.0 h2o_c + nadp_c	1.14.19.1	382.482	0		R300	0	C190ACP_c + h_c + nadph_c + o2_c --> C191ACP_c + 2.0 h2o_c + nadp_c	1.14.19.1	382.482	0		R300	0	C190ACP_c + h_c + nadph_c + o2_c --> C191ACP_c + 2.0 h2o_c + nadp_c	1.14.19.1	382.482	0		R300
R301	0	C191ACP_c + h_c + nadph_c + o2_c --> C192ACP_c + 2.0 h2o_c + nadp_c	1.14.19.3				R301	0	C191ACP_c + h_c + nadph_c + o2_c --> C192ACP_c + 2.0 h2o_c + nadp_c	1.14.19.3				R301	0	C191ACP_c + h_c + nadph_c + o2_c --> C192ACP_c + 2.0 h2o_c + nadp_c	1.14.19.3				R301	0	C191ACP_c + h_c + nadph_c + o2_c --> C192ACP_c + 2.0 h2o_c + nadp_c	1.14.19.3				R301	0	C191ACP_c + h_c + nadph_c + o2_c --> C192ACP_c + 2.0 h2o_c + nadp_c	1.14.19.3				R301	0	C191ACP_c + h_c + nadph_c + o2_c --> C192ACP_c + 2.0 h2o_c + nadp_c	1.14.19.3				R301	0	C191ACP_c + h_c + nadph_c + o2_c --> C192ACP_c + 2.0 h2o_c + nadp_c	1.14.19.3				R301
R302	-2.50506e-15	C180ACP_c + h_c + nadph_c + o2_c --> C181ACP_c + 2.0 h2o_c + nadp_c		382.482	-6.54949e-18		R302	0	C180ACP_c + h_c + nadph_c + o2_c --> C181ACP_c + 2.0 h2o_c + nadp_c		382.482	0		R302	-2.98953e-18	C180ACP_c + h_c + nadph_c + o2_c --> C181ACP_c + 2.0 h2o_c + nadp_c		382.482	-7.81614e-21		R302	2.12554e-15	C180ACP_c + h_c + nadph_c + o2_c --> C181ACP_c + 2.0 h2o_c + nadp_c		382.482	5.55723e-18		R302	-5.16747e-17	C180ACP_c + h_c + nadph_c + o2_c --> C181ACP_c + 2.0 h2o_c + nadp_c		382.482	-1.35104e-19		R302	-2.06097e-16	C180ACP_c + h_c + nadph_c + o2_c --> C181ACP_c + 2.0 h2o_c + nadp_c		382.482	-5.38841e-19		R302	0	C180ACP_c + h_c + nadph_c + o2_c --> C181ACP_c + 2.0 h2o_c + nadp_c		382.482	0		R302
R303	0	C181ACP_c + h_c + nadph_c + o2_c --> C182ACP_c + 2.0 h2o_c + nadp_c	1.14.19.3				R303	0	C181ACP_c + h_c + nadph_c + o2_c --> C182ACP_c + 2.0 h2o_c + nadp_c	1.14.19.3				R303	-9.1369e-19	C181ACP_c + h_c + nadph_c + o2_c --> C182ACP_c + 2.0 h2o_c + nadp_c	1.14.19.3				R303	0	C181ACP_c + h_c + nadph_c + o2_c --> C182ACP_c + 2.0 h2o_c + nadp_c	1.14.19.3				R303	0	C181ACP_c + h_c + nadph_c + o2_c --> C182ACP_c + 2.0 h2o_c + nadp_c	1.14.19.3				R303	0	C181ACP_c + h_c + nadph_c + o2_c --> C182ACP_c + 2.0 h2o_c + nadp_c	1.14.19.3				R303	0	C181ACP_c + h_c + nadph_c + o2_c --> C182ACP_c + 2.0 h2o_c + nadp_c	1.14.19.3				R303
R304	0	C160ACP_c + h_c + nadph_c + o2_c --> C161ACP_c + 2.0 h2o_c + nadp_c		382.482	0		R304	0	C160ACP_c + h_c + nadph_c + o2_c --> C161ACP_c + 2.0 h2o_c + nadp_c		382.482	0		R304	0	C160ACP_c + h_c + nadph_c + o2_c --> C161ACP_c + 2.0 h2o_c + nadp_c		382.482	0		R304	0	C160ACP_c + h_c + nadph_c + o2_c --> C161ACP_c + 2.0 h2o_c + nadp_c		382.482	0		R304	0	C160ACP_c + h_c + nadph_c + o2_c --> C161ACP_c + 2.0 h2o_c + nadp_c		382.482	0		R304	0	C160ACP_c + h_c + nadph_c + o2_c --> C161ACP_c + 2.0 h2o_c + nadp_c		382.482	0		R304	0	C160ACP_c + h_c + nadph_c + o2_c --> C161ACP_c + 2.0 h2o_c + nadp_c		382.482	0		R304
R305	0	C161ACP_c + h_c + nadph_c + o2_c --> C162ACP_c + 2.0 h2o_c + nadp_c	1.14.19.3				R305	0	C161ACP_c + h_c + nadph_c + o2_c --> C162ACP_c + 2.0 h2o_c + nadp_c	1.14.19.3				R305	0	C161ACP_c + h_c + nadph_c + o2_c --> C162ACP_c + 2.0 h2o_c + nadp_c	1.14.19.3				R305	0	C161ACP_c + h_c + nadph_c + o2_c --> C162ACP_c + 2.0 h2o_c + nadp_c	1.14.19.3				R305	0	C161ACP_c + h_c + nadph_c + o2_c --> C162ACP_c + 2.0 h2o_c + nadp_c	1.14.19.3				R305	0	C161ACP_c + h_c + nadph_c + o2_c --> C162ACP_c + 2.0 h2o_c + nadp_c	1.14.19.3				R305	0	C161ACP_c + h_c + nadph_c + o2_c --> C162ACP_c + 2.0 h2o_c + nadp_c	1.14.19.3				R305
R306	0	C140ACP_c + h_c + nadph_c + o2_c --> C141ACP_c + 2.0 h2o_c + nadp_c	1.14.19.1	382.482	0		R306	0	C140ACP_c + h_c + nadph_c + o2_c --> C141ACP_c + 2.0 h2o_c + nadp_c	1.14.19.1	382.482	0		R306	0	C140ACP_c + h_c + nadph_c + o2_c --> C141ACP_c + 2.0 h2o_c + nadp_c	1.14.19.1	382.482	0		R306	0	C140ACP_c + h_c + nadph_c + o2_c --> C141ACP_c + 2.0 h2o_c + nadp_c	1.14.19.1	382.482	0		R306	5.16747e-17	C140ACP_c + h_c + nadph_c + o2_c --> C141ACP_c + 2.0 h2o_c + nadp_c	1.14.19.1	382.482	1.35104e-19		R306	0	C140ACP_c + h_c + nadph_c + o2_c --> C141ACP_c + 2.0 h2o_c + nadp_c	1.14.19.1	382.482	0		R306	0	C140ACP_c + h_c + nadph_c + o2_c --> C141ACP_c + 2.0 h2o_c + nadp_c	1.14.19.1	382.482	0		R306
R307	0	h2o_x + od2coa_x --> CE2248_x	4.2.1.134				R307	0	h2o_x + od2coa_x --> CE2248_x	4.2.1.134				R307	0	h2o_x + od2coa_x --> CE2248_x	4.2.1.134				R307	0	h2o_x + od2coa_x --> CE2248_x	4.2.1.134				R307	0	h2o_x + od2coa_x --> CE2248_x	4.2.1.134				R307	0	h2o_x + od2coa_x --> CE2248_x	4.2.1.134				R307	0	h2o_x + od2coa_x --> CE2248_x	4.2.1.134				R307
R308	0	CPD_10261_x --> h2o_x + od2coa_x	4.2.1.119	3653.3	0		R308	0	CPD_10261_x --> h2o_x + od2coa_x	4.2.1.119	3653.3	0		R308	0	CPD_10261_x --> h2o_x + od2coa_x	4.2.1.119	3653.3	0		R308	0	CPD_10261_x --> h2o_x + od2coa_x	4.2.1.119	3653.3	0		R308	0	CPD_10261_x --> h2o_x + od2coa_x	4.2.1.119	3653.3	0		R308	0	CPD_10261_x --> h2o_x + od2coa_x	4.2.1.119	3653.3	0		R308	0	CPD_10261_x --> h2o_x + od2coa_x	4.2.1.119	3653.3	0		R308
R309	0	h_x + nadph_x + od2coa_x --> nadp_x + stcoa_x		577.95	0		R309	0	h_x + nadph_x + od2coa_x --> nadp_x + stcoa_x		577.95	0		R309	0	h_x + nadph_x + od2coa_x --> nadp_x + stcoa_x		577.95	0		R309	0	h_x + nadph_x + od2coa_x --> nadp_x + stcoa_x		577.95	0		R309	0	h_x + nadph_x + od2coa_x --> nadp_x + stcoa_x		577.95	0		R309	0	h_x + nadph_x + od2coa_x --> nadp_x + stcoa_x		577.95	0		R309	0	h_x + nadph_x + od2coa_x --> nadp_x + stcoa_x		577.95	0		R309
R310	0	3ohodcoa_c + h_c + nadph_c --> CPD_10261_c + nadp_c		343.98	0		R310	0	3ohodcoa_c + h_c + nadph_c --> CPD_10261_c + nadp_c		343.98	0		R310	0	3ohodcoa_c + h_c + nadph_c --> CPD_10261_c + nadp_c		343.98	0		R310	0	3ohodcoa_c + h_c + nadph_c --> CPD_10261_c + nadp_c		343.98	0		R310	0	3ohodcoa_c + h_c + nadph_c --> CPD_10261_c + nadp_c		343.98	0		R310	0	3ohodcoa_c + h_c + nadph_c --> CPD_10261_c + nadp_c		343.98	0		R310	0	3ohodcoa_c + h_c + nadph_c --> CPD_10261_c + nadp_c		343.98	0		R310
R311	0	C16173_c + accoa_c --> C16389_c + coa_c	2.3.1.16,2.3.1.176	499.338	0		R311	0	C16173_c + accoa_c --> C16389_c + coa_c	2.3.1.16,2.3.1.176	499.338	0		R311	0	C16173_c + accoa_c --> C16389_c + coa_c	2.3.1.16,2.3.1.176	499.338	0		R311	0	C16173_c + accoa_c --> C16389_c + coa_c	2.3.1.16,2.3.1.176	499.338	0		R311	0	C16173_c + accoa_c --> C16389_c + coa_c	2.3.1.16,2.3.1.176	499.338	0		R311	0	C16173_c + accoa_c --> C16389_c + coa_c	2.3.1.16,2.3.1.176	499.338	0		R311	0	C16173_c + accoa_c --> C16389_c + coa_c	2.3.1.16,2.3.1.176	499.338	0		R311
R312	0	C16388_c --> C16387_c + h2o_c	4.2.1.119	701.359	0		R312	0	C16388_c --> C16387_c + h2o_c	4.2.1.119	701.359	0		R312	0	C16388_c --> C16387_c + h2o_c	4.2.1.119	701.359	0		R312	0	C16388_c --> C16387_c + h2o_c	4.2.1.119	701.359	0		R312	0	C16388_c --> C16387_c + h2o_c	4.2.1.119	701.359	0		R312	0	C16388_c --> C16387_c + h2o_c	4.2.1.119	701.359	0		R312	0	C16388_c --> C16387_c + h2o_c	4.2.1.119	701.359	0		R312
R313	0	C16388_c + nad_c --> C16389_c + h_c + nadh_c	1.1.1.-				R313	0	C16388_c + nad_c --> C16389_c + h_c + nadh_c	1.1.1.-				R313	0	C16388_c + nad_c --> C16389_c + h_c + nadh_c	1.1.1.-				R313	0	C16388_c + nad_c --> C16389_c + h_c + nadh_c	1.1.1.-				R313	0	C16388_c + nad_c --> C16389_c + h_c + nadh_c	1.1.1.-				R313	0	C16388_c + nad_c --> C16389_c + h_c + nadh_c	1.1.1.-				R313	0	C16388_c + nad_c --> C16389_c + h_c + nadh_c	1.1.1.-				R313
R314	0	h_m + malcoa_m + pmtcoa_m --> 3ohodcoa_m + co2_m + coa_m	2.3.1.199				R314	0	h_m + malcoa_m + pmtcoa_m --> 3ohodcoa_m + co2_m + coa_m	2.3.1.199				R314	0	h_m + malcoa_m + pmtcoa_m --> 3ohodcoa_m + co2_m + coa_m	2.3.1.199				R314	0	h_m + malcoa_m + pmtcoa_m --> 3ohodcoa_m + co2_m + coa_m	2.3.1.199				R314	0	h_m + malcoa_m + pmtcoa_m --> 3ohodcoa_m + co2_m + coa_m	2.3.1.199				R314	0	h_m + malcoa_m + pmtcoa_m --> 3ohodcoa_m + co2_m + coa_m	2.3.1.199				R314	0	h_m + malcoa_m + pmtcoa_m --> 3ohodcoa_m + co2_m + coa_m	2.3.1.199				R314
R315_num1	0	C16173_m + accoa_m --> C16389_m + coa_m	2.3.1.16,2.3.1.176	549.218	0		R315_num1	0	C16173_m + accoa_m --> C16389_m + coa_m	2.3.1.16,2.3.1.176	549.218	0		R315_num1	0	C16173_m + accoa_m --> C16389_m + coa_m	2.3.1.16,2.3.1.176	549.218	0		R315_num1	0	C16173_m + accoa_m --> C16389_m + coa_m	2.3.1.16,2.3.1.176	549.218	0		R315_num1	0	C16173_m + accoa_m --> C16389_m + coa_m	2.3.1.16,2.3.1.176	549.218	0		R315_num1	0	C16173_m + accoa_m --> C16389_m + coa_m	2.3.1.16,2.3.1.176	549.218	0		R315_num1	0	C16173_m + accoa_m --> C16389_m + coa_m	2.3.1.16,2.3.1.176	549.218	0		R315_num1
R316	-2.90243e-15	2.0 focytb5_m + 2.0 h_m + o2_m + ocdce9coa_m --> 2.0 ficytb5_m + 2.0 h2o_m + lnlccoa_m	1.14.19.6				R316	0	2.0 focytb5_m + 2.0 h_m + o2_m + ocdce9coa_m --> 2.0 ficytb5_m + 2.0 h2o_m + lnlccoa_m	1.14.19.6				R316	-3.04324e-19	2.0 focytb5_m + 2.0 h_m + o2_m + ocdce9coa_m --> 2.0 ficytb5_m + 2.0 h2o_m + lnlccoa_m	1.14.19.6				R316	0	2.0 focytb5_m + 2.0 h_m + o2_m + ocdce9coa_m --> 2.0 ficytb5_m + 2.0 h2o_m + lnlccoa_m	1.14.19.6				R316	-5.16747e-17	2.0 focytb5_m + 2.0 h_m + o2_m + ocdce9coa_m --> 2.0 ficytb5_m + 2.0 h2o_m + lnlccoa_m	1.14.19.6				R316	0	2.0 focytb5_m + 2.0 h_m + o2_m + ocdce9coa_m --> 2.0 ficytb5_m + 2.0 h2o_m + lnlccoa_m	1.14.19.6				R316	0	2.0 focytb5_m + 2.0 h_m + o2_m + ocdce9coa_m --> 2.0 ficytb5_m + 2.0 h2o_m + lnlccoa_m	1.14.19.6				R316
R317	0	2.0 focytb5_m + 2.0 h_m + lnlccoa_m + o2_m --> 2.0 ficytb5_m + 2.0 h2o_m + lnlncacoa_m	1.14.19.-				R317	0	2.0 focytb5_m + 2.0 h_m + lnlccoa_m + o2_m --> 2.0 ficytb5_m + 2.0 h2o_m + lnlncacoa_m	1.14.19.-				R317	3.04324e-19	2.0 focytb5_m + 2.0 h_m + lnlccoa_m + o2_m --> 2.0 ficytb5_m + 2.0 h2o_m + lnlncacoa_m	1.14.19.-				R317	0	2.0 focytb5_m + 2.0 h_m + lnlccoa_m + o2_m --> 2.0 ficytb5_m + 2.0 h2o_m + lnlncacoa_m	1.14.19.-				R317	0	2.0 focytb5_m + 2.0 h_m + lnlccoa_m + o2_m --> 2.0 ficytb5_m + 2.0 h2o_m + lnlncacoa_m	1.14.19.-				R317	0	2.0 focytb5_m + 2.0 h_m + lnlccoa_m + o2_m --> 2.0 ficytb5_m + 2.0 h2o_m + lnlncacoa_m	1.14.19.-				R317	0	2.0 focytb5_m + 2.0 h_m + lnlccoa_m + o2_m --> 2.0 ficytb5_m + 2.0 h2o_m + lnlncacoa_m	1.14.19.-				R317
R318	0	2.0 focytb5_x + 2.0 h_x + o2_x + pmtcoa_x --> C21072_x + 2.0 ficytb5_x + 2.0 h2o_x	1.14.19.1	382.482	0		R318	0	2.0 focytb5_x + 2.0 h_x + o2_x + pmtcoa_x --> C21072_x + 2.0 ficytb5_x + 2.0 h2o_x	1.14.19.1	382.482	0		R318	0	2.0 focytb5_x + 2.0 h_x + o2_x + pmtcoa_x --> C21072_x + 2.0 ficytb5_x + 2.0 h2o_x	1.14.19.1	382.482	0		R318	0	2.0 focytb5_x + 2.0 h_x + o2_x + pmtcoa_x --> C21072_x + 2.0 ficytb5_x + 2.0 h2o_x	1.14.19.1	382.482	0		R318	0	2.0 focytb5_x + 2.0 h_x + o2_x + pmtcoa_x --> C21072_x + 2.0 ficytb5_x + 2.0 h2o_x	1.14.19.1	382.482	0		R318	0	2.0 focytb5_x + 2.0 h_x + o2_x + pmtcoa_x --> C21072_x + 2.0 ficytb5_x + 2.0 h2o_x	1.14.19.1	382.482	0		R318	0	2.0 focytb5_x + 2.0 h_x + o2_x + pmtcoa_x --> C21072_x + 2.0 ficytb5_x + 2.0 h2o_x	1.14.19.1	382.482	0		R318
R319	0	2.0 focytb5_x + 2.0 h_x + lnlccoa_x + o2_x --> 2.0 ficytb5_x + 2.0 h2o_x + lnlncacoa_x	1.14.19.-				R319	0	2.0 focytb5_x + 2.0 h_x + lnlccoa_x + o2_x --> 2.0 ficytb5_x + 2.0 h2o_x + lnlncacoa_x	1.14.19.-				R319	0	2.0 focytb5_x + 2.0 h_x + lnlccoa_x + o2_x --> 2.0 ficytb5_x + 2.0 h2o_x + lnlncacoa_x	1.14.19.-				R319	0	2.0 focytb5_x + 2.0 h_x + lnlccoa_x + o2_x --> 2.0 ficytb5_x + 2.0 h2o_x + lnlncacoa_x	1.14.19.-				R319	0	2.0 focytb5_x + 2.0 h_x + lnlccoa_x + o2_x --> 2.0 ficytb5_x + 2.0 h2o_x + lnlncacoa_x	1.14.19.-				R319	0	2.0 focytb5_x + 2.0 h_x + lnlccoa_x + o2_x --> 2.0 ficytb5_x + 2.0 h2o_x + lnlncacoa_x	1.14.19.-				R319	0	2.0 focytb5_x + 2.0 h_x + lnlccoa_x + o2_x --> 2.0 ficytb5_x + 2.0 h2o_x + lnlncacoa_x	1.14.19.-				R319
R320	0	2.0 focytb5_x + 2.0 h_x + o2_x + stcoa_x --> 2.0 ficytb5_x + 2.0 h2o_x + ocdce9coa_x	1.14.19.1	382.482	0		R320	0	2.0 focytb5_x + 2.0 h_x + o2_x + stcoa_x --> 2.0 ficytb5_x + 2.0 h2o_x + ocdce9coa_x	1.14.19.1	382.482	0		R320	0	2.0 focytb5_x + 2.0 h_x + o2_x + stcoa_x --> 2.0 ficytb5_x + 2.0 h2o_x + ocdce9coa_x	1.14.19.1	382.482	0		R320	0	2.0 focytb5_x + 2.0 h_x + o2_x + stcoa_x --> 2.0 ficytb5_x + 2.0 h2o_x + ocdce9coa_x	1.14.19.1	382.482	0		R320	0	2.0 focytb5_x + 2.0 h_x + o2_x + stcoa_x --> 2.0 ficytb5_x + 2.0 h2o_x + ocdce9coa_x	1.14.19.1	382.482	0		R320	0	2.0 focytb5_x + 2.0 h_x + o2_x + stcoa_x --> 2.0 ficytb5_x + 2.0 h2o_x + ocdce9coa_x	1.14.19.1	382.482	0		R320	0	2.0 focytb5_x + 2.0 h_x + o2_x + stcoa_x --> 2.0 ficytb5_x + 2.0 h2o_x + ocdce9coa_x	1.14.19.1	382.482	0		R320
R321_num1	0	ala__L_x + anth_x + 3.0 atp_x + trp__L_x --> C22145_x + 3.0 amp_x + h2o_x + 2.0 h_x + 3.0 ppi_x	6.3.2.-				R321_num1	0	ala__L_x + anth_x + 3.0 atp_x + trp__L_x --> C22145_x + 3.0 amp_x + h2o_x + 2.0 h_x + 3.0 ppi_x	6.3.2.-				R321_num1	0	ala__L_x + anth_x + 3.0 atp_x + trp__L_x --> C22145_x + 3.0 amp_x + h2o_x + 2.0 h_x + 3.0 ppi_x	6.3.2.-				R321_num1	0	ala__L_x + anth_x + 3.0 atp_x + trp__L_x --> C22145_x + 3.0 amp_x + h2o_x + 2.0 h_x + 3.0 ppi_x	6.3.2.-				R321_num1	0	ala__L_x + anth_x + 3.0 atp_x + trp__L_x --> C22145_x + 3.0 amp_x + h2o_x + 2.0 h_x + 3.0 ppi_x	6.3.2.-				R321_num1	0	ala__L_x + anth_x + 3.0 atp_x + trp__L_x --> C22145_x + 3.0 amp_x + h2o_x + 2.0 h_x + 3.0 ppi_x	6.3.2.-				R321_num1	0	ala__L_x + anth_x + 3.0 atp_x + trp__L_x --> C22145_x + 3.0 amp_x + h2o_x + 2.0 h_x + 3.0 ppi_x	6.3.2.-				R321_num1
R322	0	ala__L_c + anth_c + 3.0 atp_c + trp__L_c --> C22145_c + 3.0 amp_c + h2o_c + 2.0 h_c + 3.0 ppi_c	6.3.2.-				R322	0	ala__L_c + anth_c + 3.0 atp_c + trp__L_c --> C22145_c + 3.0 amp_c + h2o_c + 2.0 h_c + 3.0 ppi_c	6.3.2.-				R322	0	ala__L_c + anth_c + 3.0 atp_c + trp__L_c --> C22145_c + 3.0 amp_c + h2o_c + 2.0 h_c + 3.0 ppi_c	6.3.2.-				R322	0	ala__L_c + anth_c + 3.0 atp_c + trp__L_c --> C22145_c + 3.0 amp_c + h2o_c + 2.0 h_c + 3.0 ppi_c	6.3.2.-				R322	0	ala__L_c + anth_c + 3.0 atp_c + trp__L_c --> C22145_c + 3.0 amp_c + h2o_c + 2.0 h_c + 3.0 ppi_c	6.3.2.-				R322	0	ala__L_c + anth_c + 3.0 atp_c + trp__L_c --> C22145_c + 3.0 amp_c + h2o_c + 2.0 h_c + 3.0 ppi_c	6.3.2.-				R322	0	ala__L_c + anth_c + 3.0 atp_c + trp__L_c --> C22145_c + 3.0 amp_c + h2o_c + 2.0 h_c + 3.0 ppi_c	6.3.2.-				R322
R323_num1	0	C22146_x + ala__L_x + atp_x --> C22147_x + amp_x + h2o_x + h_c + ppi_x	6.3.2.-				R323_num1	0	C22146_x + ala__L_x + atp_x --> C22147_x + amp_x + h2o_x + h_c + ppi_x	6.3.2.-				R323_num1	0	C22146_x + ala__L_x + atp_x --> C22147_x + amp_x + h2o_x + h_c + ppi_x	6.3.2.-				R323_num1	0	C22146_x + ala__L_x + atp_x --> C22147_x + amp_x + h2o_x + h_c + ppi_x	6.3.2.-				R323_num1	0	C22146_x + ala__L_x + atp_x --> C22147_x + amp_x + h2o_x + h_c + ppi_x	6.3.2.-				R323_num1	0	C22146_x + ala__L_x + atp_x --> C22147_x + amp_x + h2o_x + h_c + ppi_x	6.3.2.-				R323_num1	0	C22146_x + ala__L_x + atp_x --> C22147_x + amp_x + h2o_x + h_c + ppi_x	6.3.2.-				R323_num1
R324	0	3.0 C03024_c + C22145_c + 2.0 o2_c --> 3.0 C03161_c + C22146_c + 2.0 h2o_c	1.14.14.-				R324	0	3.0 C03024_c + C22145_c + 2.0 o2_c --> 3.0 C03161_c + C22146_c + 2.0 h2o_c	1.14.14.-				R324	0	3.0 C03024_c + C22145_c + 2.0 o2_c --> 3.0 C03161_c + C22146_c + 2.0 h2o_c	1.14.14.-				R324	0	3.0 C03024_c + C22145_c + 2.0 o2_c --> 3.0 C03161_c + C22146_c + 2.0 h2o_c	1.14.14.-				R324	0	3.0 C03024_c + C22145_c + 2.0 o2_c --> 3.0 C03161_c + C22146_c + 2.0 h2o_c	1.14.14.-				R324	0	3.0 C03024_c + C22145_c + 2.0 o2_c --> 3.0 C03161_c + C22146_c + 2.0 h2o_c	1.14.14.-				R324	0	3.0 C03024_c + C22145_c + 2.0 o2_c --> 3.0 C03161_c + C22146_c + 2.0 h2o_c	1.14.14.-				R324
R325_num1	0	ala__L_c + h_c + pmcoa_c --> 8aonn_c + co2_c + coa_c	2.3.1.47	129.997	0		R325_num1	0	ala__L_c + h_c + pmcoa_c --> 8aonn_c + co2_c + coa_c	2.3.1.47	129.997	0		R325_num1	0	ala__L_c + h_c + pmcoa_c --> 8aonn_c + co2_c + coa_c	2.3.1.47	129.997	0		R325_num1	0	ala__L_c + h_c + pmcoa_c --> 8aonn_c + co2_c + coa_c	2.3.1.47	129.997	0		R325_num1	0	ala__L_c + h_c + pmcoa_c --> 8aonn_c + co2_c + coa_c	2.3.1.47	129.997	0		R325_num1	0	ala__L_c + h_c + pmcoa_c --> 8aonn_c + co2_c + coa_c	2.3.1.47	129.997	0		R325_num1	0	ala__L_c + h_c + pmcoa_c --> 8aonn_c + co2_c + coa_c	2.3.1.47	129.997	0		R325_num1
R326	0	8aonn_c + amet_c --> amob_c + dann_c	2.6.1.62	946.143	0		R326	0	8aonn_c + amet_c --> amob_c + dann_c	2.6.1.62	946.143	0		R326	0	8aonn_c + amet_c --> amob_c + dann_c	2.6.1.62	946.143	0		R326	0	8aonn_c + amet_c --> amob_c + dann_c	2.6.1.62	946.143	0		R326	0	8aonn_c + amet_c --> amob_c + dann_c	2.6.1.62	946.143	0		R326	0	8aonn_c + amet_c --> amob_c + dann_c	2.6.1.62	946.143	0		R326	0	8aonn_c + amet_c --> amob_c + dann_c	2.6.1.62	946.143	0		R326
R327	0	atp_c + co2_c + dann_c --> adp_c + dtbt_c + 3.0 h_c + pi_c	6.3.3.3	1000.46	0		R327	0	atp_c + co2_c + dann_c --> adp_c + dtbt_c + 3.0 h_c + pi_c	6.3.3.3	1000.46	0		R327	0	atp_c + co2_c + dann_c --> adp_c + dtbt_c + 3.0 h_c + pi_c	6.3.3.3	1000.46	0		R327	0	atp_c + co2_c + dann_c --> adp_c + dtbt_c + 3.0 h_c + pi_c	6.3.3.3	1000.46	0		R327	0	atp_c + co2_c + dann_c --> adp_c + dtbt_c + 3.0 h_c + pi_c	6.3.3.3	1000.46	0		R327	0	atp_c + co2_c + dann_c --> adp_c + dtbt_c + 3.0 h_c + pi_c	6.3.3.3	1000.46	0		R327	0	atp_c + co2_c + dann_c --> adp_c + dtbt_c + 3.0 h_c + pi_c	6.3.3.3	1000.46	0		R327
R328	0	2.0 amet_c + dtbt_c + s_c --> btn_c + 2.0 dad_2_c + 2.0 met__L_c	2.8.1.6	1426.49	0		R328	0	2.0 amet_c + dtbt_c + s_c --> btn_c + 2.0 dad_2_c + 2.0 met__L_c	2.8.1.6	1426.49	0		R328	0	2.0 amet_c + dtbt_c + s_c --> btn_c + 2.0 dad_2_c + 2.0 met__L_c	2.8.1.6	1426.49	0		R328	0	2.0 amet_c + dtbt_c + s_c --> btn_c + 2.0 dad_2_c + 2.0 met__L_c	2.8.1.6	1426.49	0		R328	0	2.0 amet_c + dtbt_c + s_c --> btn_c + 2.0 dad_2_c + 2.0 met__L_c	2.8.1.6	1426.49	0		R328	0	2.0 amet_c + dtbt_c + s_c --> btn_c + 2.0 dad_2_c + 2.0 met__L_c	2.8.1.6	1426.49	0		R328	0	2.0 amet_c + dtbt_c + s_c --> btn_c + 2.0 dad_2_c + 2.0 met__L_c	2.8.1.6	1426.49	0		R328
R329	0	C19673_c + h_c + malACP_c --> ACP_c + C20372_c + co2_c	2.3.1.179,2.3.1.41	557.646	0		R329	0	C19673_c + h_c + malACP_c --> ACP_c + C20372_c + co2_c	2.3.1.179,2.3.1.41	557.646	0		R329	0	C19673_c + h_c + malACP_c --> ACP_c + C20372_c + co2_c	2.3.1.179,2.3.1.41	557.646	0		R329	0	C19673_c + h_c + malACP_c --> ACP_c + C20372_c + co2_c	2.3.1.179,2.3.1.41	557.646	0		R329	0	C19673_c + h_c + malACP_c --> ACP_c + C20372_c + co2_c	2.3.1.179,2.3.1.41	557.646	0		R329	0	C19673_c + h_c + malACP_c --> ACP_c + C20372_c + co2_c	2.3.1.179,2.3.1.41	557.646	0		R329	0	C19673_c + h_c + malACP_c --> ACP_c + C20372_c + co2_c	2.3.1.179,2.3.1.41	557.646	0		R329
R330	0	gmeACP_c + h_c + malACP_c --> ACP_c + C20376_c + co2_c	2.3.1.179,2.3.1.41	557.646	0		R330	0	gmeACP_c + h_c + malACP_c --> ACP_c + C20376_c + co2_c	2.3.1.179,2.3.1.41	557.646	0		R330	0	gmeACP_c + h_c + malACP_c --> ACP_c + C20376_c + co2_c	2.3.1.179,2.3.1.41	557.646	0		R330	0	gmeACP_c + h_c + malACP_c --> ACP_c + C20376_c + co2_c	2.3.1.179,2.3.1.41	557.646	0		R330	0	gmeACP_c + h_c + malACP_c --> ACP_c + C20376_c + co2_c	2.3.1.179,2.3.1.41	557.646	0		R330	0	gmeACP_c + h_c + malACP_c --> ACP_c + C20376_c + co2_c	2.3.1.179,2.3.1.41	557.646	0		R330	0	gmeACP_c + h_c + malACP_c --> ACP_c + C20376_c + co2_c	2.3.1.179,2.3.1.41	557.646	0		R330
R331	0	BCCP_L_LYSINE_c + atp_c + btn_c --> BCCP_BIOTIN_L_LYSINE_c + amp_c + h_c + ppi_c	6.3.4.15	668.165	0		R331	0	BCCP_L_LYSINE_c + atp_c + btn_c --> BCCP_BIOTIN_L_LYSINE_c + amp_c + h_c + ppi_c	6.3.4.15	668.165	0		R331	0	BCCP_L_LYSINE_c + atp_c + btn_c --> BCCP_BIOTIN_L_LYSINE_c + amp_c + h_c + ppi_c	6.3.4.15	668.165	0		R331	0	BCCP_L_LYSINE_c + atp_c + btn_c --> BCCP_BIOTIN_L_LYSINE_c + amp_c + h_c + ppi_c	6.3.4.15	668.165	0		R331	0	BCCP_L_LYSINE_c + atp_c + btn_c --> BCCP_BIOTIN_L_LYSINE_c + amp_c + h_c + ppi_c	6.3.4.15	668.165	0		R331	0	BCCP_L_LYSINE_c + atp_c + btn_c --> BCCP_BIOTIN_L_LYSINE_c + amp_c + h_c + ppi_c	6.3.4.15	668.165	0		R331	0	BCCP_L_LYSINE_c + atp_c + btn_c --> BCCP_BIOTIN_L_LYSINE_c + amp_c + h_c + ppi_c	6.3.4.15	668.165	0		R331
R332_num1	0	1btol_c + nadp_c --> btal_c + h_c + nadph_c	1.1.1.2	3492.32	0		R332_num1	0	1btol_c + nadp_c --> btal_c + h_c + nadph_c	1.1.1.2	3492.32	0		R332_num1	0	1btol_c + nadp_c --> btal_c + h_c + nadph_c	1.1.1.2	3492.32	0		R332_num1	0	1btol_c + nadp_c --> btal_c + h_c + nadph_c	1.1.1.2	3492.32	0		R332_num1	0	1btol_c + nadp_c --> btal_c + h_c + nadph_c	1.1.1.2	3492.32	0		R332_num1	0	1btol_c + nadp_c --> btal_c + h_c + nadph_c	1.1.1.2	3492.32	0		R332_num1	0	1btol_c + nadp_c --> btal_c + h_c + nadph_c	1.1.1.2	3492.32	0		R332_num1
R333	0	2_HYDROXYGLUTARIC_ACID_m + fad_m + h_m --> akg_m + fadh2_m		1502.91	0		R333	0	2_HYDROXYGLUTARIC_ACID_m + fad_m + h_m --> akg_m + fadh2_m		1502.91	0		R333	0	2_HYDROXYGLUTARIC_ACID_m + fad_m + h_m --> akg_m + fadh2_m		1502.91	0		R333	0	2_HYDROXYGLUTARIC_ACID_m + fad_m + h_m --> akg_m + fadh2_m		1502.91	0		R333	0	2_HYDROXYGLUTARIC_ACID_m + fad_m + h_m --> akg_m + fadh2_m		1502.91	0		R333	0	2_HYDROXYGLUTARIC_ACID_m + fad_m + h_m --> akg_m + fadh2_m		1502.91	0		R333	0	2_HYDROXYGLUTARIC_ACID_m + fad_m + h_m --> akg_m + fadh2_m		1502.91	0		R333
R334	0	h_c + nadph_c + sucsal_c --> ghb_c + nadp_c		698.297	0		R334	0	h_c + nadph_c + sucsal_c --> ghb_c + nadp_c		698.297	0		R334	0	h_c + nadph_c + sucsal_c --> ghb_c + nadp_c		698.297	0		R334	0	h_c + nadph_c + sucsal_c --> ghb_c + nadp_c		698.297	0		R334	0	h_c + nadph_c + sucsal_c --> ghb_c + nadp_c		698.297	0		R334	0	h_c + nadph_c + sucsal_c --> ghb_c + nadp_c		698.297	0		R334	0	h_c + nadph_c + sucsal_c --> ghb_c + nadp_c		698.297	0		R334
R335	-2.91073e-31	CPD_3618_c + h_c --> btal_c + co2_c		1200.44	-2.42472e-34		R335	0	CPD_3618_c + h_c --> btal_c + co2_c		1200.44	0		R335	0	CPD_3618_c + h_c --> btal_c + co2_c		1200.44	0		R335	0	CPD_3618_c + h_c --> btal_c + co2_c		1200.44	0		R335	0	CPD_3618_c + h_c --> btal_c + co2_c		1200.44	0		R335	0	CPD_3618_c + h_c --> btal_c + co2_c		1200.44	0		R335	0	CPD_3618_c + h_c --> btal_c + co2_c		1200.44	0		R335
R336	0	CPD_1130_c + nad_c --> CPD_3618_c + co2_c + nadh_c	1.1.1.85	747.418	0		R336	0	CPD_1130_c + nad_c --> CPD_3618_c + co2_c + nadh_c	1.1.1.85	747.418	0		R336	0	CPD_1130_c + nad_c --> CPD_3618_c + co2_c + nadh_c	1.1.1.85	747.418	0		R336	0	CPD_1130_c + nad_c --> CPD_3618_c + co2_c + nadh_c	1.1.1.85	747.418	0		R336	0	CPD_1130_c + nad_c --> CPD_3618_c + co2_c + nadh_c	1.1.1.85	747.418	0		R336	0	CPD_1130_c + nad_c --> CPD_3618_c + co2_c + nadh_c	1.1.1.85	747.418	0		R336	0	CPD_1130_c + nad_c --> CPD_3618_c + co2_c + nadh_c	1.1.1.85	747.418	0		R336
R337	0	3mob_c + h_c --> 2mppal_c + co2_c	4.1.1.72	1274.08	0		R337	0	3mob_c + h_c --> 2mppal_c + co2_c	4.1.1.72	1274.08	0		R337	0	3mob_c + h_c --> 2mppal_c + co2_c	4.1.1.72	1274.08	0		R337	0	3mob_c + h_c --> 2mppal_c + co2_c	4.1.1.72	1274.08	0		R337	0	3mob_c + h_c --> 2mppal_c + co2_c	4.1.1.72	1274.08	0		R337	0	3mob_c + h_c --> 2mppal_c + co2_c	4.1.1.72	1274.08	0		R337	0	3mob_c + h_c --> 2mppal_c + co2_c	4.1.1.72	1274.08	0		R337
R338_num1	0	ibutoh_c + nad_c --> 2mppal_c + h_c + nadh_c	1.1.1.1	1173.89	0		R338_num1	0	ibutoh_c + nad_c --> 2mppal_c + h_c + nadh_c	1.1.1.1	1173.89	0		R338_num1	0	ibutoh_c + nad_c --> 2mppal_c + h_c + nadh_c	1.1.1.1	1173.89	0		R338_num1	0	ibutoh_c + nad_c --> 2mppal_c + h_c + nadh_c	1.1.1.1	1173.89	0		R338_num1	0	ibutoh_c + nad_c --> 2mppal_c + h_c + nadh_c	1.1.1.1	1173.89	0		R338_num1	0	ibutoh_c + nad_c --> 2mppal_c + h_c + nadh_c	1.1.1.1	1173.89	0		R338_num1	0	ibutoh_c + nad_c --> 2mppal_c + h_c + nadh_c	1.1.1.1	1173.89	0		R338_num1
R339	0	1_7_DIMETHYLXANTHINE_c + h2o_c + o2_c --> CPD_12483_c + h2o2_c		1951.53	0		R339	0	1_7_DIMETHYLXANTHINE_c + h2o_c + o2_c --> CPD_12483_c + h2o2_c		1951.53	0		R339	0	1_7_DIMETHYLXANTHINE_c + h2o_c + o2_c --> CPD_12483_c + h2o2_c		1951.53	0		R339	0	1_7_DIMETHYLXANTHINE_c + h2o_c + o2_c --> CPD_12483_c + h2o2_c		1951.53	0		R339	0	1_7_DIMETHYLXANTHINE_c + h2o_c + o2_c --> CPD_12483_c + h2o2_c		1951.53	0		R339	0	1_7_DIMETHYLXANTHINE_c + h2o_c + o2_c --> CPD_12483_c + h2o2_c		1951.53	0		R339	0	1_7_DIMETHYLXANTHINE_c + h2o_c + o2_c --> CPD_12483_c + h2o2_c		1951.53	0		R339
R340	0	CPD_9025_c + h2o_c + o2_c --> CPD_14119_c + h2o2_c	1.17.3.2	1951.53	0		R340	0	CPD_9025_c + h2o_c + o2_c --> CPD_14119_c + h2o2_c	1.17.3.2	1951.53	0		R340	0	CPD_9025_c + h2o_c + o2_c --> CPD_14119_c + h2o2_c	1.17.3.2	1951.53	0		R340	0	CPD_9025_c + h2o_c + o2_c --> CPD_14119_c + h2o2_c	1.17.3.2	1951.53	0		R340	0	CPD_9025_c + h2o_c + o2_c --> CPD_14119_c + h2o2_c	1.17.3.2	1951.53	0		R340	0	CPD_9025_c + h2o_c + o2_c --> CPD_14119_c + h2o2_c	1.17.3.2	1951.53	0		R340	0	CPD_9025_c + h2o_c + o2_c --> CPD_14119_c + h2o2_c	1.17.3.2	1951.53	0		R340
R341	0	1_3_7_TRIMETHYLXANTHINE_m + h_m + nadph_m + o2_m --> 1_7_DIMETHYLXANTHINE_m + fald_m + h2o_m + nadp_m	1.14.13.179	41.6192	0		R341	0	1_3_7_TRIMETHYLXANTHINE_m + h_m + nadph_m + o2_m --> 1_7_DIMETHYLXANTHINE_m + fald_m + h2o_m + nadp_m	1.14.13.179	41.6192	0		R341	0	1_3_7_TRIMETHYLXANTHINE_m + h_m + nadph_m + o2_m --> 1_7_DIMETHYLXANTHINE_m + fald_m + h2o_m + nadp_m	1.14.13.179	41.6192	0		R341	0	1_3_7_TRIMETHYLXANTHINE_m + h_m + nadph_m + o2_m --> 1_7_DIMETHYLXANTHINE_m + fald_m + h2o_m + nadp_m	1.14.13.179	41.6192	0		R341	0	1_3_7_TRIMETHYLXANTHINE_m + h_m + nadph_m + o2_m --> 1_7_DIMETHYLXANTHINE_m + fald_m + h2o_m + nadp_m	1.14.13.179	41.6192	0		R341	0	1_3_7_TRIMETHYLXANTHINE_m + h_m + nadph_m + o2_m --> 1_7_DIMETHYLXANTHINE_m + fald_m + h2o_m + nadp_m	1.14.13.179	41.6192	0		R341	0	1_3_7_TRIMETHYLXANTHINE_m + h_m + nadph_m + o2_m --> 1_7_DIMETHYLXANTHINE_m + fald_m + h2o_m + nadp_m	1.14.13.179	41.6192	0		R341
R342	0	1_7_DIMETHYLXANTHINE_m --> CPD_9025_m	1.14.14.1	41.6192	0		R342	0	1_7_DIMETHYLXANTHINE_m --> CPD_9025_m	1.14.14.1	41.6192	0		R342	0	1_7_DIMETHYLXANTHINE_m --> CPD_9025_m	1.14.14.1	41.6192	0		R342	0	1_7_DIMETHYLXANTHINE_m --> CPD_9025_m	1.14.14.1	41.6192	0		R342	0	1_7_DIMETHYLXANTHINE_m --> CPD_9025_m	1.14.14.1	41.6192	0		R342	0	1_7_DIMETHYLXANTHINE_m --> CPD_9025_m	1.14.14.1	41.6192	0		R342	0	1_7_DIMETHYLXANTHINE_m --> CPD_9025_m	1.14.14.1	41.6192	0		R342
R343	0	1_7_DIMETHYLXANTHINE_m --> CPD_12483_m	1.14.13.-,1.14.14.1	41.6192	0		R343	0	1_7_DIMETHYLXANTHINE_m --> CPD_12483_m	1.14.13.-,1.14.14.1	41.6192	0		R343	0	1_7_DIMETHYLXANTHINE_m --> CPD_12483_m	1.14.13.-,1.14.14.1	41.6192	0		R343	0	1_7_DIMETHYLXANTHINE_m --> CPD_12483_m	1.14.13.-,1.14.14.1	41.6192	0		R343	0	1_7_DIMETHYLXANTHINE_m --> CPD_12483_m	1.14.13.-,1.14.14.1	41.6192	0		R343	0	1_7_DIMETHYLXANTHINE_m --> CPD_12483_m	1.14.13.-,1.14.14.1	41.6192	0		R343	0	1_7_DIMETHYLXANTHINE_m --> CPD_12483_m	1.14.13.-,1.14.14.1	41.6192	0		R343
R344	0	CPD_18382_m + RED_NADPH_HEMOPROTEIN_REDUCTASES_m + o2_m --> CPD_18383_m + OX_NADPH_HEMOPROTEIN_REDUCTASES_m + h2o_m		741.532	0		R344	0	CPD_18382_m + RED_NADPH_HEMOPROTEIN_REDUCTASES_m + o2_m --> CPD_18383_m + OX_NADPH_HEMOPROTEIN_REDUCTASES_m + h2o_m		741.532	0		R344	0	CPD_18382_m + RED_NADPH_HEMOPROTEIN_REDUCTASES_m + o2_m --> CPD_18383_m + OX_NADPH_HEMOPROTEIN_REDUCTASES_m + h2o_m		741.532	0		R344	0	CPD_18382_m + RED_NADPH_HEMOPROTEIN_REDUCTASES_m + o2_m --> CPD_18383_m + OX_NADPH_HEMOPROTEIN_REDUCTASES_m + h2o_m		741.532	0		R344	0	CPD_18382_m + RED_NADPH_HEMOPROTEIN_REDUCTASES_m + o2_m --> CPD_18383_m + OX_NADPH_HEMOPROTEIN_REDUCTASES_m + h2o_m		741.532	0		R344	0	CPD_18382_m + RED_NADPH_HEMOPROTEIN_REDUCTASES_m + o2_m --> CPD_18383_m + OX_NADPH_HEMOPROTEIN_REDUCTASES_m + h2o_m		741.532	0		R344	0	CPD_18382_m + RED_NADPH_HEMOPROTEIN_REDUCTASES_m + o2_m --> CPD_18383_m + OX_NADPH_HEMOPROTEIN_REDUCTASES_m + h2o_m		741.532	0		R344
R345	0	CPD_18381_m + RED_NADPH_HEMOPROTEIN_REDUCTASES_m + o2_m --> CPD_18382_m + OX_NADPH_HEMOPROTEIN_REDUCTASES_m + h2o_m		741.532	0		R345	0	CPD_18381_m + RED_NADPH_HEMOPROTEIN_REDUCTASES_m + o2_m --> CPD_18382_m + OX_NADPH_HEMOPROTEIN_REDUCTASES_m + h2o_m		741.532	0		R345	0	CPD_18381_m + RED_NADPH_HEMOPROTEIN_REDUCTASES_m + o2_m --> CPD_18382_m + OX_NADPH_HEMOPROTEIN_REDUCTASES_m + h2o_m		741.532	0		R345	0	CPD_18381_m + RED_NADPH_HEMOPROTEIN_REDUCTASES_m + o2_m --> CPD_18382_m + OX_NADPH_HEMOPROTEIN_REDUCTASES_m + h2o_m		741.532	0		R345	0	CPD_18381_m + RED_NADPH_HEMOPROTEIN_REDUCTASES_m + o2_m --> CPD_18382_m + OX_NADPH_HEMOPROTEIN_REDUCTASES_m + h2o_m		741.532	0		R345	0	CPD_18381_m + RED_NADPH_HEMOPROTEIN_REDUCTASES_m + o2_m --> CPD_18382_m + OX_NADPH_HEMOPROTEIN_REDUCTASES_m + h2o_m		741.532	0		R345	0	CPD_18381_m + RED_NADPH_HEMOPROTEIN_REDUCTASES_m + o2_m --> CPD_18382_m + OX_NADPH_HEMOPROTEIN_REDUCTASES_m + h2o_m		741.532	0		R345
R346	0	RED_NADPH_HEMOPROTEIN_REDUCTASES_m + TRICHODIENE_CPD_m + o2_m --> CPD_18381_m + OX_NADPH_HEMOPROTEIN_REDUCTASES_m + h2o_m		741.532	0		R346	0	RED_NADPH_HEMOPROTEIN_REDUCTASES_m + TRICHODIENE_CPD_m + o2_m --> CPD_18381_m + OX_NADPH_HEMOPROTEIN_REDUCTASES_m + h2o_m		741.532	0		R346	0	RED_NADPH_HEMOPROTEIN_REDUCTASES_m + TRICHODIENE_CPD_m + o2_m --> CPD_18381_m + OX_NADPH_HEMOPROTEIN_REDUCTASES_m + h2o_m		741.532	0		R346	0	RED_NADPH_HEMOPROTEIN_REDUCTASES_m + TRICHODIENE_CPD_m + o2_m --> CPD_18381_m + OX_NADPH_HEMOPROTEIN_REDUCTASES_m + h2o_m		741.532	0		R346	0	RED_NADPH_HEMOPROTEIN_REDUCTASES_m + TRICHODIENE_CPD_m + o2_m --> CPD_18381_m + OX_NADPH_HEMOPROTEIN_REDUCTASES_m + h2o_m		741.532	0		R346	0	RED_NADPH_HEMOPROTEIN_REDUCTASES_m + TRICHODIENE_CPD_m + o2_m --> CPD_18381_m + OX_NADPH_HEMOPROTEIN_REDUCTASES_m + h2o_m		741.532	0		R346	0	RED_NADPH_HEMOPROTEIN_REDUCTASES_m + TRICHODIENE_CPD_m + o2_m --> CPD_18381_m + OX_NADPH_HEMOPROTEIN_REDUCTASES_m + h2o_m		741.532	0		R346
R347_num1	0	CYCLOHEXANONE_c + h_c + nadph_c + o2_c --> CPD_101_c + h2o_c + nadp_c	1.14.13.22	550.416	0		R347_num1	0	CYCLOHEXANONE_c + h_c + nadph_c + o2_c --> CPD_101_c + h2o_c + nadp_c	1.14.13.22	550.416	0		R347_num1	0	CYCLOHEXANONE_c + h_c + nadph_c + o2_c --> CPD_101_c + h2o_c + nadp_c	1.14.13.22	550.416	0		R347_num1	0	CYCLOHEXANONE_c + h_c + nadph_c + o2_c --> CPD_101_c + h2o_c + nadp_c	1.14.13.22	550.416	0		R347_num1	0	CYCLOHEXANONE_c + h_c + nadph_c + o2_c --> CPD_101_c + h2o_c + nadp_c	1.14.13.22	550.416	0		R347_num1	0	CYCLOHEXANONE_c + h_c + nadph_c + o2_c --> CPD_101_c + h2o_c + nadp_c	1.14.13.22	550.416	0		R347_num1	0	CYCLOHEXANONE_c + h_c + nadph_c + o2_c --> CPD_101_c + h2o_c + nadp_c	1.14.13.22	550.416	0		R347_num1
R348	0	CPD_101_c + h2o_c --> CPD_102_c + h_c		2415.8	0		R348	0	CPD_101_c + h2o_c --> CPD_102_c + h_c		2415.8	0		R348	0	CPD_101_c + h2o_c --> CPD_102_c + h_c		2415.8	0		R348	0	CPD_101_c + h2o_c --> CPD_102_c + h_c		2415.8	0		R348	0	CPD_101_c + h2o_c --> CPD_102_c + h_c		2415.8	0		R348	0	CPD_101_c + h2o_c --> CPD_102_c + h_c		2415.8	0		R348	0	CPD_101_c + h2o_c --> CPD_102_c + h_c		2415.8	0		R348
R349_num1	0	CPD_102_c + nadp_c --> 6_OXO_HEXANOATE_c + h_c + nadph_c	1.1.1.2	2294.26	0		R349_num1	0	CPD_102_c + nadp_c --> 6_OXO_HEXANOATE_c + h_c + nadph_c	1.1.1.2	2294.26	0		R349_num1	0	CPD_102_c + nadp_c --> 6_OXO_HEXANOATE_c + h_c + nadph_c	1.1.1.2	2294.26	0		R349_num1	0	CPD_102_c + nadp_c --> 6_OXO_HEXANOATE_c + h_c + nadph_c	1.1.1.2	2294.26	0		R349_num1	0	CPD_102_c + nadp_c --> 6_OXO_HEXANOATE_c + h_c + nadph_c	1.1.1.2	2294.26	0		R349_num1	0	CPD_102_c + nadp_c --> 6_OXO_HEXANOATE_c + h_c + nadph_c	1.1.1.2	2294.26	0		R349_num1	0	CPD_102_c + nadp_c --> 6_OXO_HEXANOATE_c + h_c + nadph_c	1.1.1.2	2294.26	0		R349_num1
R350_num1	0	CYCLOHEXANONE_x + h_x + nadph_x + o2_x --> CPD_101_x + h2o_x + nadp_x	1.14.13.22	532.909	0		R350_num1	0	CYCLOHEXANONE_x + h_x + nadph_x + o2_x --> CPD_101_x + h2o_x + nadp_x	1.14.13.22	532.909	0		R350_num1	0	CYCLOHEXANONE_x + h_x + nadph_x + o2_x --> CPD_101_x + h2o_x + nadp_x	1.14.13.22	532.909	0		R350_num1	0	CYCLOHEXANONE_x + h_x + nadph_x + o2_x --> CPD_101_x + h2o_x + nadp_x	1.14.13.22	532.909	0		R350_num1	0	CYCLOHEXANONE_x + h_x + nadph_x + o2_x --> CPD_101_x + h2o_x + nadp_x	1.14.13.22	532.909	0		R350_num1	0	CYCLOHEXANONE_x + h_x + nadph_x + o2_x --> CPD_101_x + h2o_x + nadp_x	1.14.13.22	532.909	0		R350_num1	0	CYCLOHEXANONE_x + h_x + nadph_x + o2_x --> CPD_101_x + h2o_x + nadp_x	1.14.13.22	532.909	0		R350_num1
R351	-4.44089e-16	e4p_c + xu5p__D_c --> f6p_c + g3p_c	2.2.1.1	317.127	-1.40035e-18		R351	0.24025	e4p_c + xu5p__D_c --> f6p_c + g3p_c	2.2.1.1	317.127	0.000757584		R351	0	e4p_c + xu5p__D_c --> f6p_c + g3p_c	2.2.1.1	317.127	0		R351	0	e4p_c + xu5p__D_c --> f6p_c + g3p_c	2.2.1.1	317.127	0		R351	0	e4p_c + xu5p__D_c --> f6p_c + g3p_c	2.2.1.1	317.127	0		R351	0	e4p_c + xu5p__D_c --> f6p_c + g3p_c	2.2.1.1	317.127	0		R351	0	e4p_c + xu5p__D_c --> f6p_c + g3p_c	2.2.1.1	317.127	0		R351
R352_num1	0	f6p_c + pi_c --> actp_c + e4p_c + h2o_c	4.1.2.22	335.507	0		R352_num1	0	f6p_c + pi_c --> actp_c + e4p_c + h2o_c	4.1.2.22	335.507	0		R352_num1	0	f6p_c + pi_c --> actp_c + e4p_c + h2o_c	4.1.2.22	335.507	0		R352_num1	0	f6p_c + pi_c --> actp_c + e4p_c + h2o_c	4.1.2.22	335.507	0		R352_num1	0	f6p_c + pi_c --> actp_c + e4p_c + h2o_c	4.1.2.22	335.507	0		R352_num1	0	f6p_c + pi_c --> actp_c + e4p_c + h2o_c	4.1.2.22	335.507	0		R352_num1	0	f6p_c + pi_c --> actp_c + e4p_c + h2o_c	4.1.2.22	335.507	0		R352_num1
R353	0	dhap_c + e4p_c --> s17bp_c		1252.05	0		R353	0	dhap_c + e4p_c --> s17bp_c		1252.05	0		R353	0	dhap_c + e4p_c --> s17bp_c		1252.05	0		R353	0	dhap_c + e4p_c --> s17bp_c		1252.05	0		R353	0	dhap_c + e4p_c --> s17bp_c		1252.05	0		R353	0	dhap_c + e4p_c --> s17bp_c		1252.05	0		R353	0	dhap_c + e4p_c --> s17bp_c		1252.05	0		R353
R354	0	2.0 REDUCED_FERREDOXINS_c + bcryptox_c + 2.0 h_c + o2_c --> 2.0 OXIDIZED_FERREDOXINS_c + h2o_c + zeax_c		590.438	0		R354	0	2.0 REDUCED_FERREDOXINS_c + bcryptox_c + 2.0 h_c + o2_c --> 2.0 OXIDIZED_FERREDOXINS_c + h2o_c + zeax_c		590.438	0		R354	0	2.0 REDUCED_FERREDOXINS_c + bcryptox_c + 2.0 h_c + o2_c --> 2.0 OXIDIZED_FERREDOXINS_c + h2o_c + zeax_c		590.438	0		R354	0	2.0 REDUCED_FERREDOXINS_c + bcryptox_c + 2.0 h_c + o2_c --> 2.0 OXIDIZED_FERREDOXINS_c + h2o_c + zeax_c		590.438	0		R354	0	2.0 REDUCED_FERREDOXINS_c + bcryptox_c + 2.0 h_c + o2_c --> 2.0 OXIDIZED_FERREDOXINS_c + h2o_c + zeax_c		590.438	0		R354	0	2.0 REDUCED_FERREDOXINS_c + bcryptox_c + 2.0 h_c + o2_c --> 2.0 OXIDIZED_FERREDOXINS_c + h2o_c + zeax_c		590.438	0		R354	0	2.0 REDUCED_FERREDOXINS_c + bcryptox_c + 2.0 h_c + o2_c --> 2.0 OXIDIZED_FERREDOXINS_c + h2o_c + zeax_c		590.438	0		R354
R355	0	2.0 REDUCED_FERREDOXINS_c + caro_c + 2.0 h_c + o2_c --> 2.0 OXIDIZED_FERREDOXINS_c + bcryptox_c + h2o_c		590.438	0		R355	0	2.0 REDUCED_FERREDOXINS_c + caro_c + 2.0 h_c + o2_c --> 2.0 OXIDIZED_FERREDOXINS_c + bcryptox_c + h2o_c		590.438	0		R355	0	2.0 REDUCED_FERREDOXINS_c + caro_c + 2.0 h_c + o2_c --> 2.0 OXIDIZED_FERREDOXINS_c + bcryptox_c + h2o_c		590.438	0		R355	0	2.0 REDUCED_FERREDOXINS_c + caro_c + 2.0 h_c + o2_c --> 2.0 OXIDIZED_FERREDOXINS_c + bcryptox_c + h2o_c		590.438	0		R355	0	2.0 REDUCED_FERREDOXINS_c + caro_c + 2.0 h_c + o2_c --> 2.0 OXIDIZED_FERREDOXINS_c + bcryptox_c + h2o_c		590.438	0		R355	0	2.0 REDUCED_FERREDOXINS_c + caro_c + 2.0 h_c + o2_c --> 2.0 OXIDIZED_FERREDOXINS_c + bcryptox_c + h2o_c		590.438	0		R355	0	2.0 REDUCED_FERREDOXINS_c + caro_c + 2.0 h_c + o2_c --> 2.0 OXIDIZED_FERREDOXINS_c + bcryptox_c + h2o_c		590.438	0		R355
R356	0	2.0 REDUCED_FERREDOXINS_m + bcryptox_m + 2.0 h_m + o2_m --> 2.0 OXIDIZED_FERREDOXINS_m + h2o_m + zeax_m		511.701	0		R356	0	2.0 REDUCED_FERREDOXINS_m + bcryptox_m + 2.0 h_m + o2_m --> 2.0 OXIDIZED_FERREDOXINS_m + h2o_m + zeax_m		511.701	0		R356	0	2.0 REDUCED_FERREDOXINS_m + bcryptox_m + 2.0 h_m + o2_m --> 2.0 OXIDIZED_FERREDOXINS_m + h2o_m + zeax_m		511.701	0		R356	0	2.0 REDUCED_FERREDOXINS_m + bcryptox_m + 2.0 h_m + o2_m --> 2.0 OXIDIZED_FERREDOXINS_m + h2o_m + zeax_m		511.701	0		R356	0	2.0 REDUCED_FERREDOXINS_m + bcryptox_m + 2.0 h_m + o2_m --> 2.0 OXIDIZED_FERREDOXINS_m + h2o_m + zeax_m		511.701	0		R356	0	2.0 REDUCED_FERREDOXINS_m + bcryptox_m + 2.0 h_m + o2_m --> 2.0 OXIDIZED_FERREDOXINS_m + h2o_m + zeax_m		511.701	0		R356	0	2.0 REDUCED_FERREDOXINS_m + bcryptox_m + 2.0 h_m + o2_m --> 2.0 OXIDIZED_FERREDOXINS_m + h2o_m + zeax_m		511.701	0		R356
R357	0	2.0 REDUCED_FERREDOXINS_m + caro_m + 2.0 h_m + o2_m --> 2.0 OXIDIZED_FERREDOXINS_m + bcryptox_m + h2o_m		511.701	0		R357	0	2.0 REDUCED_FERREDOXINS_m + caro_m + 2.0 h_m + o2_m --> 2.0 OXIDIZED_FERREDOXINS_m + bcryptox_m + h2o_m		511.701	0		R357	0	2.0 REDUCED_FERREDOXINS_m + caro_m + 2.0 h_m + o2_m --> 2.0 OXIDIZED_FERREDOXINS_m + bcryptox_m + h2o_m		511.701	0		R357	0	2.0 REDUCED_FERREDOXINS_m + caro_m + 2.0 h_m + o2_m --> 2.0 OXIDIZED_FERREDOXINS_m + bcryptox_m + h2o_m		511.701	0		R357	0	2.0 REDUCED_FERREDOXINS_m + caro_m + 2.0 h_m + o2_m --> 2.0 OXIDIZED_FERREDOXINS_m + bcryptox_m + h2o_m		511.701	0		R357	0	2.0 REDUCED_FERREDOXINS_m + caro_m + 2.0 h_m + o2_m --> 2.0 OXIDIZED_FERREDOXINS_m + bcryptox_m + h2o_m		511.701	0		R357	0	2.0 REDUCED_FERREDOXINS_m + caro_m + 2.0 h_m + o2_m --> 2.0 OXIDIZED_FERREDOXINS_m + bcryptox_m + h2o_m		511.701	0		R357
R359	0	CPD3DJ_82_m + 2.0 focytb5_m + 2.0 h_m + o2_m --> crm_cho_m + 2.0 ficytb5_m + 2.0 h2o_m	1.14.19.17				R359	0	CPD3DJ_82_m + 2.0 focytb5_m + 2.0 h_m + o2_m --> crm_cho_m + 2.0 ficytb5_m + 2.0 h2o_m	1.14.19.17				R359	0	CPD3DJ_82_m + 2.0 focytb5_m + 2.0 h_m + o2_m --> crm_cho_m + 2.0 ficytb5_m + 2.0 h2o_m	1.14.19.17				R359	0	CPD3DJ_82_m + 2.0 focytb5_m + 2.0 h_m + o2_m --> crm_cho_m + 2.0 ficytb5_m + 2.0 h2o_m	1.14.19.17				R359	0	CPD3DJ_82_m + 2.0 focytb5_m + 2.0 h_m + o2_m --> crm_cho_m + 2.0 ficytb5_m + 2.0 h2o_m	1.14.19.17				R359	0	CPD3DJ_82_m + 2.0 focytb5_m + 2.0 h_m + o2_m --> crm_cho_m + 2.0 ficytb5_m + 2.0 h2o_m	1.14.19.17				R359	0	CPD3DJ_82_m + 2.0 focytb5_m + 2.0 h_m + o2_m --> crm_cho_m + 2.0 ficytb5_m + 2.0 h2o_m	1.14.19.17				R359
R360_num1	0	ACP_c + accoa_c + 3.0 amet_c + 14.0 h_c + 8.0 malcoa_c + 9.0 nadph_c --> CPD_17434_c + 3.0 ahcys_c + 8.0 co2_c + 9.0 coa_c + 7.0 h2o_c + 9.0 nadp_c		2578.6	0		R360_num1	0	ACP_c + accoa_c + 3.0 amet_c + 14.0 h_c + 8.0 malcoa_c + 9.0 nadph_c --> CPD_17434_c + 3.0 ahcys_c + 8.0 co2_c + 9.0 coa_c + 7.0 h2o_c + 9.0 nadp_c		2578.6	0		R360_num1	0	ACP_c + accoa_c + 3.0 amet_c + 14.0 h_c + 8.0 malcoa_c + 9.0 nadph_c --> CPD_17434_c + 3.0 ahcys_c + 8.0 co2_c + 9.0 coa_c + 7.0 h2o_c + 9.0 nadp_c		2578.6	0		R360_num1	0	ACP_c + accoa_c + 3.0 amet_c + 14.0 h_c + 8.0 malcoa_c + 9.0 nadph_c --> CPD_17434_c + 3.0 ahcys_c + 8.0 co2_c + 9.0 coa_c + 7.0 h2o_c + 9.0 nadp_c		2578.6	0		R360_num1	0	ACP_c + accoa_c + 3.0 amet_c + 14.0 h_c + 8.0 malcoa_c + 9.0 nadph_c --> CPD_17434_c + 3.0 ahcys_c + 8.0 co2_c + 9.0 coa_c + 7.0 h2o_c + 9.0 nadp_c		2578.6	0		R360_num1	0	ACP_c + accoa_c + 3.0 amet_c + 14.0 h_c + 8.0 malcoa_c + 9.0 nadph_c --> CPD_17434_c + 3.0 ahcys_c + 8.0 co2_c + 9.0 coa_c + 7.0 h2o_c + 9.0 nadp_c		2578.6	0		R360_num1	0	ACP_c + accoa_c + 3.0 amet_c + 14.0 h_c + 8.0 malcoa_c + 9.0 nadph_c --> CPD_17434_c + 3.0 ahcys_c + 8.0 co2_c + 9.0 coa_c + 7.0 h2o_c + 9.0 nadp_c		2578.6	0		R360_num1
R361	0	ACP_x + accoa_x + 3.0 amet_x + 8.0 malcoa_x + 9.0 nadph_x --> CPD_17434_x + 3.0 ahcys_x + 8.0 co2_x + 9.0 coa_x + h_x + 9.0 nadp_x		97.6647	0		R361	0	ACP_x + accoa_x + 3.0 amet_x + 8.0 malcoa_x + 9.0 nadph_x --> CPD_17434_x + 3.0 ahcys_x + 8.0 co2_x + 9.0 coa_x + h_x + 9.0 nadp_x		97.6647	0		R361	0	ACP_x + accoa_x + 3.0 amet_x + 8.0 malcoa_x + 9.0 nadph_x --> CPD_17434_x + 3.0 ahcys_x + 8.0 co2_x + 9.0 coa_x + h_x + 9.0 nadp_x		97.6647	0		R361	0	ACP_x + accoa_x + 3.0 amet_x + 8.0 malcoa_x + 9.0 nadph_x --> CPD_17434_x + 3.0 ahcys_x + 8.0 co2_x + 9.0 coa_x + h_x + 9.0 nadp_x		97.6647	0		R361	0	ACP_x + accoa_x + 3.0 amet_x + 8.0 malcoa_x + 9.0 nadph_x --> CPD_17434_x + 3.0 ahcys_x + 8.0 co2_x + 9.0 coa_x + h_x + 9.0 nadp_x		97.6647	0		R361	0	ACP_x + accoa_x + 3.0 amet_x + 8.0 malcoa_x + 9.0 nadph_x --> CPD_17434_x + 3.0 ahcys_x + 8.0 co2_x + 9.0 coa_x + h_x + 9.0 nadp_x		97.6647	0		R361	0	ACP_x + accoa_x + 3.0 amet_x + 8.0 malcoa_x + 9.0 nadph_x --> CPD_17434_x + 3.0 ahcys_x + 8.0 co2_x + 9.0 coa_x + h_x + 9.0 nadp_x		97.6647	0		R361
R362_num1	0	CPD_17434_c + atp_c + nadph_c + trp__L_c --> ACP_c + CPD_17428_c + amp_c + h2o_c + nadp_c + ppi_c		162.112	0		R362_num1	0	CPD_17434_c + atp_c + nadph_c + trp__L_c --> ACP_c + CPD_17428_c + amp_c + h2o_c + nadp_c + ppi_c		162.112	0		R362_num1	0	CPD_17434_c + atp_c + nadph_c + trp__L_c --> ACP_c + CPD_17428_c + amp_c + h2o_c + nadp_c + ppi_c		162.112	0		R362_num1	0	CPD_17434_c + atp_c + nadph_c + trp__L_c --> ACP_c + CPD_17428_c + amp_c + h2o_c + nadp_c + ppi_c		162.112	0		R362_num1	0	CPD_17434_c + atp_c + nadph_c + trp__L_c --> ACP_c + CPD_17428_c + amp_c + h2o_c + nadp_c + ppi_c		162.112	0		R362_num1	0	CPD_17434_c + atp_c + nadph_c + trp__L_c --> ACP_c + CPD_17428_c + amp_c + h2o_c + nadp_c + ppi_c		162.112	0		R362_num1	0	CPD_17434_c + atp_c + nadph_c + trp__L_c --> ACP_c + CPD_17428_c + amp_c + h2o_c + nadp_c + ppi_c		162.112	0		R362_num1
R363	0	CPD_17434_x + atp_x + nadph_x + trp__L_x --> ACP_x + CPD_17428_x + amp_x + h_x + nadp_x + ppi_x		97.6647	0		R363	0	CPD_17434_x + atp_x + nadph_x + trp__L_x --> ACP_x + CPD_17428_x + amp_x + h_x + nadp_x + ppi_x		97.6647	0		R363	0	CPD_17434_x + atp_x + nadph_x + trp__L_x --> ACP_x + CPD_17428_x + amp_x + h_x + nadp_x + ppi_x		97.6647	0		R363	0	CPD_17434_x + atp_x + nadph_x + trp__L_x --> ACP_x + CPD_17428_x + amp_x + h_x + nadp_x + ppi_x		97.6647	0		R363	0	CPD_17434_x + atp_x + nadph_x + trp__L_x --> ACP_x + CPD_17428_x + amp_x + h_x + nadp_x + ppi_x		97.6647	0		R363	0	CPD_17434_x + atp_x + nadph_x + trp__L_x --> ACP_x + CPD_17428_x + amp_x + h_x + nadp_x + ppi_x		97.6647	0		R363	0	CPD_17434_x + atp_x + nadph_x + trp__L_x --> ACP_x + CPD_17428_x + amp_x + h_x + nadp_x + ppi_x		97.6647	0		R363
R364_num1	0	CHLOROACETALDEHYDE_c + h2o_c + nad_c --> CHLOROACETIC_ACID_c + 2.0 h_c + nadh_c	1.2.1.4	1537.46	0		R364_num1	0	CHLOROACETALDEHYDE_c + h2o_c + nad_c --> CHLOROACETIC_ACID_c + 2.0 h_c + nadh_c	1.2.1.4	1537.46	0		R364_num1	0	CHLOROACETALDEHYDE_c + h2o_c + nad_c --> CHLOROACETIC_ACID_c + 2.0 h_c + nadh_c	1.2.1.4	1537.46	0		R364_num1	0	CHLOROACETALDEHYDE_c + h2o_c + nad_c --> CHLOROACETIC_ACID_c + 2.0 h_c + nadh_c	1.2.1.4	1537.46	0		R364_num1	0	CHLOROACETALDEHYDE_c + h2o_c + nad_c --> CHLOROACETIC_ACID_c + 2.0 h_c + nadh_c	1.2.1.4	1537.46	0		R364_num1	0	CHLOROACETALDEHYDE_c + h2o_c + nad_c --> CHLOROACETIC_ACID_c + 2.0 h_c + nadh_c	1.2.1.4	1537.46	0		R364_num1	0	CHLOROACETALDEHYDE_c + h2o_c + nad_c --> CHLOROACETIC_ACID_c + 2.0 h_c + nadh_c	1.2.1.4	1537.46	0		R364_num1
R365_num1	0	fald_c + h2o_c + nad_c --> for_c + 2.0 h_c + nadh_c	1.2.1.46	9674.64	0		R365_num1	0	fald_c + h2o_c + nad_c --> for_c + 2.0 h_c + nadh_c	1.2.1.46	9674.64	0		R365_num1	0	fald_c + h2o_c + nad_c --> for_c + 2.0 h_c + nadh_c	1.2.1.46	9674.64	0		R365_num1	-6.68835e-15	fald_c + h2o_c + nad_c --> for_c + 2.0 h_c + nadh_c	1.2.1.46	9674.64	-6.91328e-19		R365_num1	0	fald_c + h2o_c + nad_c --> for_c + 2.0 h_c + nadh_c	1.2.1.46	9674.64	0		R365_num1	0	fald_c + h2o_c + nad_c --> for_c + 2.0 h_c + nadh_c	1.2.1.46	9674.64	0		R365_num1	0	fald_c + h2o_c + nad_c --> for_c + 2.0 h_c + nadh_c	1.2.1.46	9674.64	0		R365_num1
R366	0	BTOL_c + o2_c --> 2MAC_c + 2.0 h_c	1.13.11.37	1648.24	0		R366	0	BTOL_c + o2_c --> 2MAC_c + 2.0 h_c	1.13.11.37	1648.24	0		R366	0	BTOL_c + o2_c --> 2MAC_c + 2.0 h_c	1.13.11.37	1648.24	0		R366	0	BTOL_c + o2_c --> 2MAC_c + 2.0 h_c	1.13.11.37	1648.24	0		R366	0	BTOL_c + o2_c --> 2MAC_c + 2.0 h_c	1.13.11.37	1648.24	0		R366	0	BTOL_c + o2_c --> 2MAC_c + 2.0 h_c	1.13.11.37	1648.24	0		R366	0	BTOL_c + o2_c --> 2MAC_c + 2.0 h_c	1.13.11.37	1648.24	0		R366
R367	0	4_CARBOXYMETHYLENEBUT_2_EN_4_OLIDE_c + h2o_c --> 2MAC_c + h_c	3.1.1.45	535.472	0		R367	0	4_CARBOXYMETHYLENEBUT_2_EN_4_OLIDE_c + h2o_c --> 2MAC_c + h_c	3.1.1.45	535.472	0		R367	0	4_CARBOXYMETHYLENEBUT_2_EN_4_OLIDE_c + h2o_c --> 2MAC_c + h_c	3.1.1.45	535.472	0		R367	0	4_CARBOXYMETHYLENEBUT_2_EN_4_OLIDE_c + h2o_c --> 2MAC_c + h_c	3.1.1.45	535.472	0		R367	0	4_CARBOXYMETHYLENEBUT_2_EN_4_OLIDE_c + h2o_c --> 2MAC_c + h_c	3.1.1.45	535.472	0		R367	0	4_CARBOXYMETHYLENEBUT_2_EN_4_OLIDE_c + h2o_c --> 2MAC_c + h_c	3.1.1.45	535.472	0		R367	0	4_CARBOXYMETHYLENEBUT_2_EN_4_OLIDE_c + h2o_c --> 2MAC_c + h_c	3.1.1.45	535.472	0		R367
R368	0	CPD_10608_c + h2o_c --> 2MAC_c + h_c	3.1.1.45	535.472	0		R368	0	CPD_10608_c + h2o_c --> 2MAC_c + h_c	3.1.1.45	535.472	0		R368	0	CPD_10608_c + h2o_c --> 2MAC_c + h_c	3.1.1.45	535.472	0		R368	0	CPD_10608_c + h2o_c --> 2MAC_c + h_c	3.1.1.45	535.472	0		R368	0	CPD_10608_c + h2o_c --> 2MAC_c + h_c	3.1.1.45	535.472	0		R368	0	CPD_10608_c + h2o_c --> 2MAC_c + h_c	3.1.1.45	535.472	0		R368	0	CPD_10608_c + h2o_c --> 2MAC_c + h_c	3.1.1.45	535.472	0		R368
R369	0	4_CARBOXYMETHYLENEBUT_2_EN_4_OLIDE_m + h2o_m --> 2MAC_m + h_m	3.1.1.45	1200.44	0		R369	0	4_CARBOXYMETHYLENEBUT_2_EN_4_OLIDE_m + h2o_m --> 2MAC_m + h_m	3.1.1.45	1200.44	0		R369	0	4_CARBOXYMETHYLENEBUT_2_EN_4_OLIDE_m + h2o_m --> 2MAC_m + h_m	3.1.1.45	1200.44	0		R369	0	4_CARBOXYMETHYLENEBUT_2_EN_4_OLIDE_m + h2o_m --> 2MAC_m + h_m	3.1.1.45	1200.44	0		R369	0	4_CARBOXYMETHYLENEBUT_2_EN_4_OLIDE_m + h2o_m --> 2MAC_m + h_m	3.1.1.45	1200.44	0		R369	0	4_CARBOXYMETHYLENEBUT_2_EN_4_OLIDE_m + h2o_m --> 2MAC_m + h_m	3.1.1.45	1200.44	0		R369	0	4_CARBOXYMETHYLENEBUT_2_EN_4_OLIDE_m + h2o_m --> 2MAC_m + h_m	3.1.1.45	1200.44	0		R369
R370	0	CPD_10608_m + h2o_m --> 2MAC_m + h_m	3.1.1.45	1200.44	0		R370	0	CPD_10608_m + h2o_m --> 2MAC_m + h_m	3.1.1.45	1200.44	0		R370	0	CPD_10608_m + h2o_m --> 2MAC_m + h_m	3.1.1.45	1200.44	0		R370	0	CPD_10608_m + h2o_m --> 2MAC_m + h_m	3.1.1.45	1200.44	0		R370	0	CPD_10608_m + h2o_m --> 2MAC_m + h_m	3.1.1.45	1200.44	0		R370	0	CPD_10608_m + h2o_m --> 2MAC_m + h_m	3.1.1.45	1200.44	0		R370	0	CPD_10608_m + h2o_m --> 2MAC_m + h_m	3.1.1.45	1200.44	0		R370
R371	0	CHLOROACETIC_ACID_c + h2o_c --> cl_c + glyclt_c + h_c	3.8.1.3				R371	0	CHLOROACETIC_ACID_c + h2o_c --> cl_c + glyclt_c + h_c	3.8.1.3				R371	0	CHLOROACETIC_ACID_c + h2o_c --> cl_c + glyclt_c + h_c	3.8.1.3				R371	0	CHLOROACETIC_ACID_c + h2o_c --> cl_c + glyclt_c + h_c	3.8.1.3				R371	0	CHLOROACETIC_ACID_c + h2o_c --> cl_c + glyclt_c + h_c	3.8.1.3				R371	0	CHLOROACETIC_ACID_c + h2o_c --> cl_c + glyclt_c + h_c	3.8.1.3				R371	0	CHLOROACETIC_ACID_c + h2o_c --> cl_c + glyclt_c + h_c	3.8.1.3				R371
R372	0	5_ALPHA_CHOLESTA_724_DIEN_3_BETA_OL_x + 2.0 focytb5_x + 2.0 h_x + o2_x --> CPD_8646_x + 2.0 ficytb5_x + 2.0 h2o_x	1.14.19.20				R372	0	5_ALPHA_CHOLESTA_724_DIEN_3_BETA_OL_x + 2.0 focytb5_x + 2.0 h_x + o2_x --> CPD_8646_x + 2.0 ficytb5_x + 2.0 h2o_x	1.14.19.20				R372	0	5_ALPHA_CHOLESTA_724_DIEN_3_BETA_OL_x + 2.0 focytb5_x + 2.0 h_x + o2_x --> CPD_8646_x + 2.0 ficytb5_x + 2.0 h2o_x	1.14.19.20				R372	0	5_ALPHA_CHOLESTA_724_DIEN_3_BETA_OL_x + 2.0 focytb5_x + 2.0 h_x + o2_x --> CPD_8646_x + 2.0 ficytb5_x + 2.0 h2o_x	1.14.19.20				R372	0	5_ALPHA_CHOLESTA_724_DIEN_3_BETA_OL_x + 2.0 focytb5_x + 2.0 h_x + o2_x --> CPD_8646_x + 2.0 ficytb5_x + 2.0 h2o_x	1.14.19.20				R372	0	5_ALPHA_CHOLESTA_724_DIEN_3_BETA_OL_x + 2.0 focytb5_x + 2.0 h_x + o2_x --> CPD_8646_x + 2.0 ficytb5_x + 2.0 h2o_x	1.14.19.20				R372	0	5_ALPHA_CHOLESTA_724_DIEN_3_BETA_OL_x + 2.0 focytb5_x + 2.0 h_x + o2_x --> CPD_8646_x + 2.0 ficytb5_x + 2.0 h2o_x	1.14.19.20				R372
R373	-9.65148e-16	o2_m + ppcoa_m --> h2o2_m + prpncoa_m	1.3.3.6	454.771	-2.12227e-18		R373	0	o2_m + ppcoa_m --> h2o2_m + prpncoa_m	1.3.3.6	454.771	0		R373	-3.26281e-16	o2_m + ppcoa_m --> h2o2_m + prpncoa_m	1.3.3.6	454.771	-7.17461e-19		R373	0	o2_m + ppcoa_m --> h2o2_m + prpncoa_m	1.3.3.6	454.771	0		R373	0	o2_m + ppcoa_m --> h2o2_m + prpncoa_m	1.3.3.6	454.771	0		R373	-1.38051e-15	o2_m + ppcoa_m --> h2o2_m + prpncoa_m	1.3.3.6	454.771	-3.03561e-18		R373	0	o2_m + ppcoa_m --> h2o2_m + prpncoa_m	1.3.3.6	454.771	0		R373
R374	0	C03024_c + hdca_c + o2_c --> C03161_c + C18218_c + h2o_c	1.14.-.-,1.14.14.80	502.246	0		R374	0	C03024_c + hdca_c + o2_c --> C03161_c + C18218_c + h2o_c	1.14.-.-,1.14.14.80	502.246	0		R374	0	C03024_c + hdca_c + o2_c --> C03161_c + C18218_c + h2o_c	1.14.-.-,1.14.14.80	502.246	0		R374	0	C03024_c + hdca_c + o2_c --> C03161_c + C18218_c + h2o_c	1.14.-.-,1.14.14.80	502.246	0		R374	0	C03024_c + hdca_c + o2_c --> C03161_c + C18218_c + h2o_c	1.14.-.-,1.14.14.80	502.246	0		R374	0	C03024_c + hdca_c + o2_c --> C03161_c + C18218_c + h2o_c	1.14.-.-,1.14.14.80	502.246	0		R374	0	C03024_c + hdca_c + o2_c --> C03161_c + C18218_c + h2o_c	1.14.-.-,1.14.14.80	502.246	0		R374
R375	0	C03024_c + o2_c + ocdcea_c --> 18_HYDROXYOLEATE_c + C03161_c + h2o_c	1.14.14.80	502.246	0		R375	0	C03024_c + o2_c + ocdcea_c --> 18_HYDROXYOLEATE_c + C03161_c + h2o_c	1.14.14.80	502.246	0		R375	0	C03024_c + o2_c + ocdcea_c --> 18_HYDROXYOLEATE_c + C03161_c + h2o_c	1.14.14.80	502.246	0		R375	0	C03024_c + o2_c + ocdcea_c --> 18_HYDROXYOLEATE_c + C03161_c + h2o_c	1.14.14.80	502.246	0		R375	0	C03024_c + o2_c + ocdcea_c --> 18_HYDROXYOLEATE_c + C03161_c + h2o_c	1.14.14.80	502.246	0		R375	0	C03024_c + o2_c + ocdcea_c --> 18_HYDROXYOLEATE_c + C03161_c + h2o_c	1.14.14.80	502.246	0		R375	0	C03024_c + o2_c + ocdcea_c --> 18_HYDROXYOLEATE_c + C03161_c + h2o_c	1.14.14.80	502.246	0		R375
R376	0	C01025_x + h_c + ocdcea_x --> C00069_x + C19418_x	1.11.2.3				R376	0	C01025_x + h_c + ocdcea_x --> C00069_x + C19418_x	1.11.2.3				R376	0	C01025_x + h_c + ocdcea_x --> C00069_x + C19418_x	1.11.2.3				R376	0	C01025_x + h_c + ocdcea_x --> C00069_x + C19418_x	1.11.2.3				R376	0	C01025_x + h_c + ocdcea_x --> C00069_x + C19418_x	1.11.2.3				R376	0	C01025_x + h_c + ocdcea_x --> C00069_x + C19418_x	1.11.2.3				R376	0	C01025_x + h_c + ocdcea_x --> C00069_x + C19418_x	1.11.2.3				R376
R377	0	18_HYDROXYOLEATE_x + C01025_x --> 910_EPOXY_18_HYDROXYSTEARATE_x + C00069_x	1.11.2.3				R377	0	18_HYDROXYOLEATE_x + C01025_x --> 910_EPOXY_18_HYDROXYSTEARATE_x + C00069_x	1.11.2.3				R377	0	18_HYDROXYOLEATE_x + C01025_x --> 910_EPOXY_18_HYDROXYSTEARATE_x + C00069_x	1.11.2.3				R377	0	18_HYDROXYOLEATE_x + C01025_x --> 910_EPOXY_18_HYDROXYSTEARATE_x + C00069_x	1.11.2.3				R377	0	18_HYDROXYOLEATE_x + C01025_x --> 910_EPOXY_18_HYDROXYSTEARATE_x + C00069_x	1.11.2.3				R377	0	18_HYDROXYOLEATE_x + C01025_x --> 910_EPOXY_18_HYDROXYSTEARATE_x + C00069_x	1.11.2.3				R377	0	18_HYDROXYOLEATE_x + C01025_x --> 910_EPOXY_18_HYDROXYSTEARATE_x + C00069_x	1.11.2.3				R377
R378_num1	0	aprop_c + 2.0 h2o_c --> ala__L_c + nh4_c	3.5.5.1	2400.93	0		R378_num1	0	aprop_c + 2.0 h2o_c --> ala__L_c + nh4_c	3.5.5.1	2400.93	0		R378_num1	0	aprop_c + 2.0 h2o_c --> ala__L_c + nh4_c	3.5.5.1	2400.93	0		R378_num1	0	aprop_c + 2.0 h2o_c --> ala__L_c + nh4_c	3.5.5.1	2400.93	0		R378_num1	0	aprop_c + 2.0 h2o_c --> ala__L_c + nh4_c	3.5.5.1	2400.93	0		R378_num1	0	aprop_c + 2.0 h2o_c --> ala__L_c + nh4_c	3.5.5.1	2400.93	0		R378_num1	0	aprop_c + 2.0 h2o_c --> ala__L_c + nh4_c	3.5.5.1	2400.93	0		R378_num1
R379_num1	0	acybut_c + 2.0 h2o_c --> glu__L_c + nh4_c	3.5.5.1	2195.81	0		R379_num1	0	acybut_c + 2.0 h2o_c --> glu__L_c + nh4_c	3.5.5.1	2195.81	0		R379_num1	0	acybut_c + 2.0 h2o_c --> glu__L_c + nh4_c	3.5.5.1	2195.81	0		R379_num1	0	acybut_c + 2.0 h2o_c --> glu__L_c + nh4_c	3.5.5.1	2195.81	0		R379_num1	0	acybut_c + 2.0 h2o_c --> glu__L_c + nh4_c	3.5.5.1	2195.81	0		R379_num1	0	acybut_c + 2.0 h2o_c --> glu__L_c + nh4_c	3.5.5.1	2195.81	0		R379_num1	0	acybut_c + 2.0 h2o_c --> glu__L_c + nh4_c	3.5.5.1	2195.81	0		R379_num1
R380_num1	0	3CPYRD_c + 2.0 h2o_c --> nac_c + nh4_c	3.5.5.1	2400.93	0		R380_num1	0	3CPYRD_c + 2.0 h2o_c --> nac_c + nh4_c	3.5.5.1	2400.93	0		R380_num1	0	3CPYRD_c + 2.0 h2o_c --> nac_c + nh4_c	3.5.5.1	2400.93	0		R380_num1	0	3CPYRD_c + 2.0 h2o_c --> nac_c + nh4_c	3.5.5.1	2400.93	0		R380_num1	0	3CPYRD_c + 2.0 h2o_c --> nac_c + nh4_c	3.5.5.1	2400.93	0		R380_num1	0	3CPYRD_c + 2.0 h2o_c --> nac_c + nh4_c	3.5.5.1	2400.93	0		R380_num1	0	3CPYRD_c + 2.0 h2o_c --> nac_c + nh4_c	3.5.5.1	2400.93	0		R380_num1
R381_num1	0	LNM_e + h2o_e --> ACH_e + BDGLC_e	3.2.1.21	1470.42	0		R381_num1	0	LNM_e + h2o_e --> ACH_e + BDGLC_e	3.2.1.21	1470.42	0		R381_num1	0	LNM_e + h2o_e --> ACH_e + BDGLC_e	3.2.1.21	1470.42	0		R381_num1	0	LNM_e + h2o_e --> ACH_e + BDGLC_e	3.2.1.21	1470.42	0		R381_num1	0	LNM_e + h2o_e --> ACH_e + BDGLC_e	3.2.1.21	1470.42	0		R381_num1	0	LNM_e + h2o_e --> ACH_e + BDGLC_e	3.2.1.21	1470.42	0		R381_num1	0	LNM_e + h2o_e --> ACH_e + BDGLC_e	3.2.1.21	1470.42	0		R381_num1
R382_num1	0	AMYD_e + h2o_e --> PRNS_e + glc__D_e	3.2.1.21,3.2.1.117	1470.42	0		R382_num1	0	AMYD_e + h2o_e --> PRNS_e + glc__D_e	3.2.1.21,3.2.1.117	1470.42	0		R382_num1	0	AMYD_e + h2o_e --> PRNS_e + glc__D_e	3.2.1.21,3.2.1.117	1470.42	0		R382_num1	0	AMYD_e + h2o_e --> PRNS_e + glc__D_e	3.2.1.21,3.2.1.117	1470.42	0		R382_num1	0	AMYD_e + h2o_e --> PRNS_e + glc__D_e	3.2.1.21,3.2.1.117	1470.42	0		R382_num1	0	AMYD_e + h2o_e --> PRNS_e + glc__D_e	3.2.1.21,3.2.1.117	1470.42	0		R382_num1	0	AMYD_e + h2o_e --> PRNS_e + glc__D_e	3.2.1.21,3.2.1.117	1470.42	0		R382_num1
R383_num1	0	PRNS_e + h2o_e --> MDN_e + glc__D_e	3.2.1.21,3.2.1.118	1470.42	0		R383_num1	0	PRNS_e + h2o_e --> MDN_e + glc__D_e	3.2.1.21,3.2.1.118	1470.42	0		R383_num1	0	PRNS_e + h2o_e --> MDN_e + glc__D_e	3.2.1.21,3.2.1.118	1470.42	0		R383_num1	0	PRNS_e + h2o_e --> MDN_e + glc__D_e	3.2.1.21,3.2.1.118	1470.42	0		R383_num1	0	PRNS_e + h2o_e --> MDN_e + glc__D_e	3.2.1.21,3.2.1.118	1470.42	0		R383_num1	0	PRNS_e + h2o_e --> MDN_e + glc__D_e	3.2.1.21,3.2.1.118	1470.42	0		R383_num1	0	PRNS_e + h2o_e --> MDN_e + glc__D_e	3.2.1.21,3.2.1.118	1470.42	0		R383_num1
R384_num1	0	HC00955_c + glu__L_c + 2.0 h_c --> HC01577_c + h2o_c	2.3.2.2	1406.67	0		R384_num1	0	HC00955_c + glu__L_c + 2.0 h_c --> HC01577_c + h2o_c	2.3.2.2	1406.67	0		R384_num1	0	HC00955_c + glu__L_c + 2.0 h_c --> HC01577_c + h2o_c	2.3.2.2	1406.67	0		R384_num1	0	HC00955_c + glu__L_c + 2.0 h_c --> HC01577_c + h2o_c	2.3.2.2	1406.67	0		R384_num1	0	HC00955_c + glu__L_c + 2.0 h_c --> HC01577_c + h2o_c	2.3.2.2	1406.67	0		R384_num1	0	HC00955_c + glu__L_c + 2.0 h_c --> HC01577_c + h2o_c	2.3.2.2	1406.67	0		R384_num1	0	HC00955_c + glu__L_c + 2.0 h_c --> HC01577_c + h2o_c	2.3.2.2	1406.67	0		R384_num1
R385_num1	0	BETA_AMINOPROPIONITRILE_c + glu__L_c --> HC01700_c + h2o_c	2.3.2.2	1538.08	0		R385_num1	0	BETA_AMINOPROPIONITRILE_c + glu__L_c --> HC01700_c + h2o_c	2.3.2.2	1538.08	0		R385_num1	0	BETA_AMINOPROPIONITRILE_c + glu__L_c --> HC01700_c + h2o_c	2.3.2.2	1538.08	0		R385_num1	0	BETA_AMINOPROPIONITRILE_c + glu__L_c --> HC01700_c + h2o_c	2.3.2.2	1538.08	0		R385_num1	0	BETA_AMINOPROPIONITRILE_c + glu__L_c --> HC01700_c + h2o_c	2.3.2.2	1538.08	0		R385_num1	0	BETA_AMINOPROPIONITRILE_c + glu__L_c --> HC01700_c + h2o_c	2.3.2.2	1538.08	0		R385_num1	0	BETA_AMINOPROPIONITRILE_c + glu__L_c --> HC01700_c + h2o_c	2.3.2.2	1538.08	0		R385_num1
R386_num1	0	CPD_1042_c + h2o_c --> BDGLC_c + CPD_648_c	3.2.1.21	2801.15	0		R386_num1	0	CPD_1042_c + h2o_c --> BDGLC_c + CPD_648_c	3.2.1.21	2801.15	0		R386_num1	0	CPD_1042_c + h2o_c --> BDGLC_c + CPD_648_c	3.2.1.21	2801.15	0		R386_num1	0	CPD_1042_c + h2o_c --> BDGLC_c + CPD_648_c	3.2.1.21	2801.15	0		R386_num1	0	CPD_1042_c + h2o_c --> BDGLC_c + CPD_648_c	3.2.1.21	2801.15	0		R386_num1	0	CPD_1042_c + h2o_c --> BDGLC_c + CPD_648_c	3.2.1.21	2801.15	0		R386_num1	0	CPD_1042_c + h2o_c --> BDGLC_c + CPD_648_c	3.2.1.21	2801.15	0		R386_num1
R387_num1	0	CPD_10277_c + h2o_c --> BDGLC_c + CPD_12700_c	3.2.1.21	2801.15	0		R387_num1	0	CPD_10277_c + h2o_c --> BDGLC_c + CPD_12700_c	3.2.1.21	2801.15	0		R387_num1	0	CPD_10277_c + h2o_c --> BDGLC_c + CPD_12700_c	3.2.1.21	2801.15	0		R387_num1	0	CPD_10277_c + h2o_c --> BDGLC_c + CPD_12700_c	3.2.1.21	2801.15	0		R387_num1	0	CPD_10277_c + h2o_c --> BDGLC_c + CPD_12700_c	3.2.1.21	2801.15	0		R387_num1	0	CPD_10277_c + h2o_c --> BDGLC_c + CPD_12700_c	3.2.1.21	2801.15	0		R387_num1	0	CPD_10277_c + h2o_c --> BDGLC_c + CPD_12700_c	3.2.1.21	2801.15	0		R387_num1
R388	0	frmd_c + h2o_c --> for_c + nh4_c	3.5.1.49	5014.18	0		R388	0	frmd_c + h2o_c --> for_c + nh4_c	3.5.1.49	5014.18	0		R388	0	frmd_c + h2o_c --> for_c + nh4_c	3.5.1.49	5014.18	0		R388	0	frmd_c + h2o_c --> for_c + nh4_c	3.5.1.49	5014.18	0		R388	0	frmd_c + h2o_c --> for_c + nh4_c	3.5.1.49	5014.18	0		R388	0	frmd_c + h2o_c --> for_c + nh4_c	3.5.1.49	5014.18	0		R388	0	frmd_c + h2o_c --> for_c + nh4_c	3.5.1.49	5014.18	0		R388
R389_num1	0	cellb_e + h2o_e --> 2.0 BDGLC_e	3.2.1.21	1470.42	0		R389_num1	0	cellb_e + h2o_e --> 2.0 BDGLC_e	3.2.1.21	1470.42	0		R389_num1	0	cellb_e + h2o_e --> 2.0 BDGLC_e	3.2.1.21	1470.42	0		R389_num1	0	cellb_e + h2o_e --> 2.0 BDGLC_e	3.2.1.21	1470.42	0		R389_num1	0	cellb_e + h2o_e --> 2.0 BDGLC_e	3.2.1.21	1470.42	0		R389_num1	0	cellb_e + h2o_e --> 2.0 BDGLC_e	3.2.1.21	1470.42	0		R389_num1	0	cellb_e + h2o_e --> 2.0 BDGLC_e	3.2.1.21	1470.42	0		R389_num1
R390_num1	0	cellb_c + h2o_c --> 2.0 BDGLC_c	3.2.1.21	5088.64	0		R390_num1	0	cellb_c + h2o_c --> 2.0 BDGLC_c	3.2.1.21	5088.64	0		R390_num1	0	cellb_c + h2o_c --> 2.0 BDGLC_c	3.2.1.21	5088.64	0		R390_num1	0	cellb_c + h2o_c --> 2.0 BDGLC_c	3.2.1.21	5088.64	0		R390_num1	0	cellb_c + h2o_c --> 2.0 BDGLC_c	3.2.1.21	5088.64	0		R390_num1	0	cellb_c + h2o_c --> 2.0 BDGLC_c	3.2.1.21	5088.64	0		R390_num1	0	cellb_c + h2o_c --> 2.0 BDGLC_c	3.2.1.21	5088.64	0		R390_num1
R391_num1	0	CELLU_e + h2o_e --> BDGLC_e	3.2.1.21	1470.42	0		R391_num1	0	CELLU_e + h2o_e --> BDGLC_e	3.2.1.21	1470.42	0		R391_num1	0	CELLU_e + h2o_e --> BDGLC_e	3.2.1.21	1470.42	0		R391_num1	0	CELLU_e + h2o_e --> BDGLC_e	3.2.1.21	1470.42	0		R391_num1	0	CELLU_e + h2o_e --> BDGLC_e	3.2.1.21	1470.42	0		R391_num1	0	CELLU_e + h2o_e --> BDGLC_e	3.2.1.21	1470.42	0		R391_num1	0	CELLU_e + h2o_e --> BDGLC_e	3.2.1.21	1470.42	0		R391_num1
R394_num1	0	accoa_c + ser__L_c --> acser_c + coa_c		420.677	0		R394_num1	0	accoa_c + ser__L_c --> acser_c + coa_c		420.677	0		R394_num1	0	accoa_c + ser__L_c --> acser_c + coa_c		420.677	0		R394_num1	0	accoa_c + ser__L_c --> acser_c + coa_c		420.677	0		R394_num1	0	accoa_c + ser__L_c --> acser_c + coa_c		420.677	0		R394_num1	0	accoa_c + ser__L_c --> acser_c + coa_c		420.677	0		R394_num1	0	accoa_c + ser__L_c --> acser_c + coa_c		420.677	0		R394_num1
R395_num1	0	accoa_c + hom__L_c --> achms_c + coa_c	2.3.1.31	502.944	0		R395_num1	0	accoa_c + hom__L_c --> achms_c + coa_c	2.3.1.31	502.944	0		R395_num1	0	accoa_c + hom__L_c --> achms_c + coa_c	2.3.1.31	502.944	0		R395_num1	0	accoa_c + hom__L_c --> achms_c + coa_c	2.3.1.31	502.944	0		R395_num1	0	accoa_c + hom__L_c --> achms_c + coa_c	2.3.1.31	502.944	0		R395_num1	0	accoa_c + hom__L_c --> achms_c + coa_c	2.3.1.31	502.944	0		R395_num1	0	accoa_c + hom__L_c --> achms_c + coa_c	2.3.1.31	502.944	0		R395_num1
R396_num1	0	achms_c + cys__L_c --> ac_c + cyst__L_c + h_c	2.5.1.48	707.581	0		R396_num1	0	achms_c + cys__L_c --> ac_c + cyst__L_c + h_c	2.5.1.48	707.581	0		R396_num1	0	achms_c + cys__L_c --> ac_c + cyst__L_c + h_c	2.5.1.48	707.581	0		R396_num1	0	achms_c + cys__L_c --> ac_c + cyst__L_c + h_c	2.5.1.48	707.581	0		R396_num1	0	achms_c + cys__L_c --> ac_c + cyst__L_c + h_c	2.5.1.48	707.581	0		R396_num1	0	achms_c + cys__L_c --> ac_c + cyst__L_c + h_c	2.5.1.48	707.581	0		R396_num1	0	achms_c + cys__L_c --> ac_c + cyst__L_c + h_c	2.5.1.48	707.581	0		R396_num1
R397	0	achms_c + ch4s_c --> ac_c + h_c + met__L_c	2.5.1.49				R397	0	achms_c + ch4s_c --> ac_c + h_c + met__L_c	2.5.1.49				R397	0	achms_c + ch4s_c --> ac_c + h_c + met__L_c	2.5.1.49				R397	0	achms_c + ch4s_c --> ac_c + h_c + met__L_c	2.5.1.49				R397	0	achms_c + ch4s_c --> ac_c + h_c + met__L_c	2.5.1.49				R397	0	achms_c + ch4s_c --> ac_c + h_c + met__L_c	2.5.1.49				R397	0	achms_c + ch4s_c --> ac_c + h_c + met__L_c	2.5.1.49				R397
R398	0	achms_c + h2s_c --> ac_c + h_c + hcys__L_c	2.5.1.49				R398	0	achms_c + h2s_c --> ac_c + h_c + hcys__L_c	2.5.1.49				R398	0	achms_c + h2s_c --> ac_c + h_c + hcys__L_c	2.5.1.49				R398	0	achms_c + h2s_c --> ac_c + h_c + hcys__L_c	2.5.1.49				R398	0	achms_c + h2s_c --> ac_c + h_c + hcys__L_c	2.5.1.49				R398	0	achms_c + h2s_c --> ac_c + h_c + hcys__L_c	2.5.1.49				R398	0	achms_c + h2s_c --> ac_c + h_c + hcys__L_c	2.5.1.49				R398
R399_num1	0	cyst__L_c + h2o_c --> hcys__L_c + nh4_c + pyr_c	4.4.1.13	604.212	0		R399_num1	0	cyst__L_c + h2o_c --> hcys__L_c + nh4_c + pyr_c	4.4.1.13	604.212	0		R399_num1	0	cyst__L_c + h2o_c --> hcys__L_c + nh4_c + pyr_c	4.4.1.13	604.212	0		R399_num1	0	cyst__L_c + h2o_c --> hcys__L_c + nh4_c + pyr_c	4.4.1.13	604.212	0		R399_num1	0	cyst__L_c + h2o_c --> hcys__L_c + nh4_c + pyr_c	4.4.1.13	604.212	0		R399_num1	0	cyst__L_c + h2o_c --> hcys__L_c + nh4_c + pyr_c	4.4.1.13	604.212	0		R399_num1	0	cyst__L_c + h2o_c --> hcys__L_c + nh4_c + pyr_c	4.4.1.13	604.212	0		R399_num1
R400_num1	0	atp_c + h2o_c + met__L_c --> amet_c + pi_c + ppi_c	2.5.1.6	245.239	0		R400_num1	0	atp_c + h2o_c + met__L_c --> amet_c + pi_c + ppi_c	2.5.1.6	245.239	0		R400_num1	0	atp_c + h2o_c + met__L_c --> amet_c + pi_c + ppi_c	2.5.1.6	245.239	0		R400_num1	0	atp_c + h2o_c + met__L_c --> amet_c + pi_c + ppi_c	2.5.1.6	245.239	0		R400_num1	0	atp_c + h2o_c + met__L_c --> amet_c + pi_c + ppi_c	2.5.1.6	245.239	0		R400_num1	0	atp_c + h2o_c + met__L_c --> amet_c + pi_c + ppi_c	2.5.1.6	245.239	0		R400_num1	0	atp_c + h2o_c + met__L_c --> amet_c + pi_c + ppi_c	2.5.1.6	245.239	0		R400_num1
R401	0	ahcys_c + h2o_c --> adn_c + hcys__L_c	3.3.1.1	301.201	0		R401	0	ahcys_c + h2o_c --> adn_c + hcys__L_c	3.3.1.1	301.201	0		R401	0	ahcys_c + h2o_c --> adn_c + hcys__L_c	3.3.1.1	301.201	0		R401	0	ahcys_c + h2o_c --> adn_c + hcys__L_c	3.3.1.1	301.201	0		R401	0	ahcys_c + h2o_c --> adn_c + hcys__L_c	3.3.1.1	301.201	0		R401	0	ahcys_c + h2o_c --> adn_c + hcys__L_c	3.3.1.1	301.201	0		R401	0	ahcys_c + h2o_c --> adn_c + hcys__L_c	3.3.1.1	301.201	0		R401
R402	0	h2s_c + pser__L_c --> cys__L_c + pi_c	2.5.1.65	1221.55	0		R402	1.00626	h2s_c + pser__L_c --> cys__L_c + pi_c	2.5.1.65	1221.55	0.00082376		R402	0	h2s_c + pser__L_c --> cys__L_c + pi_c	2.5.1.65	1221.55	0		R402	1.92715e-15	h2s_c + pser__L_c --> cys__L_c + pi_c	2.5.1.65	1221.55	1.57763e-18		R402	0	h2s_c + pser__L_c --> cys__L_c + pi_c	2.5.1.65	1221.55	0		R402	0	h2s_c + pser__L_c --> cys__L_c + pi_c	2.5.1.65	1221.55	0		R402	0	h2s_c + pser__L_c --> cys__L_c + pi_c	2.5.1.65	1221.55	0		R402
R403	0	h2s_m + pser__L_m --> cys__L_m + pi_m	2.5.1.65	1203.29	0		R403	0	h2s_m + pser__L_m --> cys__L_m + pi_m	2.5.1.65	1203.29	0		R403	0	h2s_m + pser__L_m --> cys__L_m + pi_m	2.5.1.65	1203.29	0		R403	0	h2s_m + pser__L_m --> cys__L_m + pi_m	2.5.1.65	1203.29	0		R403	0	h2s_m + pser__L_m --> cys__L_m + pi_m	2.5.1.65	1203.29	0		R403	0	h2s_m + pser__L_m --> cys__L_m + pi_m	2.5.1.65	1203.29	0		R403	0	h2s_m + pser__L_m --> cys__L_m + pi_m	2.5.1.65	1203.29	0		R403
R404_num1	0	3SALA_c + akg_c --> 3_SULFINYL_PYRUVATE_c + glu__L_c		8650.06	0		R404_num1	0	3SALA_c + akg_c --> 3_SULFINYL_PYRUVATE_c + glu__L_c		8650.06	0		R404_num1	0	3SALA_c + akg_c --> 3_SULFINYL_PYRUVATE_c + glu__L_c		8650.06	0		R404_num1	0	3SALA_c + akg_c --> 3_SULFINYL_PYRUVATE_c + glu__L_c		8650.06	0		R404_num1	0	3SALA_c + akg_c --> 3_SULFINYL_PYRUVATE_c + glu__L_c		8650.06	0		R404_num1	0	3SALA_c + akg_c --> 3_SULFINYL_PYRUVATE_c + glu__L_c		8650.06	0		R404_num1	0	3SALA_c + akg_c --> 3_SULFINYL_PYRUVATE_c + glu__L_c		8650.06	0		R404_num1
R405	0	Lcyst_c + h2o_c --> h_c + nh4_c + pyr_c + so3_c	4.4.1.25				R405	0	Lcyst_c + h2o_c --> h_c + nh4_c + pyr_c + so3_c	4.4.1.25				R405	0	Lcyst_c + h2o_c --> h_c + nh4_c + pyr_c + so3_c	4.4.1.25				R405	0	Lcyst_c + h2o_c --> h_c + nh4_c + pyr_c + so3_c	4.4.1.25				R405	0	Lcyst_c + h2o_c --> h_c + nh4_c + pyr_c + so3_c	4.4.1.25				R405	0	Lcyst_c + h2o_c --> h_c + nh4_c + pyr_c + so3_c	4.4.1.25				R405	0	Lcyst_c + h2o_c --> h_c + nh4_c + pyr_c + so3_c	4.4.1.25				R405
R406_num1	0	cysi__L_c + h2o_c --> nh4_c + pyr_c + thcys_c	4.4.1.35				R406_num1	0	cysi__L_c + h2o_c --> nh4_c + pyr_c + thcys_c	4.4.1.35				R406_num1	0	cysi__L_c + h2o_c --> nh4_c + pyr_c + thcys_c	4.4.1.35				R406_num1	0	cysi__L_c + h2o_c --> nh4_c + pyr_c + thcys_c	4.4.1.35				R406_num1	0	cysi__L_c + h2o_c --> nh4_c + pyr_c + thcys_c	4.4.1.35				R406_num1	0	cysi__L_c + h2o_c --> nh4_c + pyr_c + thcys_c	4.4.1.35				R406_num1	0	cysi__L_c + h2o_c --> nh4_c + pyr_c + thcys_c	4.4.1.35				R406_num1
R407	0	hcys__L_c + mhpglu_c --> hpglu_c + met__L_c	2.1.1.14	25.7123	0		R407	0	hcys__L_c + mhpglu_c --> hpglu_c + met__L_c	2.1.1.14	25.7123	0		R407	0	hcys__L_c + mhpglu_c --> hpglu_c + met__L_c	2.1.1.14	25.7123	0		R407	0	hcys__L_c + mhpglu_c --> hpglu_c + met__L_c	2.1.1.14	25.7123	0		R407	0	hcys__L_c + mhpglu_c --> hpglu_c + met__L_c	2.1.1.14	25.7123	0		R407	0	hcys__L_c + mhpglu_c --> hpglu_c + met__L_c	2.1.1.14	25.7123	0		R407	0	hcys__L_c + mhpglu_c --> hpglu_c + met__L_c	2.1.1.14	25.7123	0		R407
R408	0	cys__L_c + h2o_c --> h2s_c + nh4_c + pyr_c	4.4.1.1,4.4.1.28	435.488	0		R408	0	cys__L_c + h2o_c --> h2s_c + nh4_c + pyr_c	4.4.1.1,4.4.1.28	435.488	0		R408	0	cys__L_c + h2o_c --> h2s_c + nh4_c + pyr_c	4.4.1.1,4.4.1.28	435.488	0		R408	0	cys__L_c + h2o_c --> h2s_c + nh4_c + pyr_c	4.4.1.1,4.4.1.28	435.488	0		R408	0	cys__L_c + h2o_c --> h2s_c + nh4_c + pyr_c	4.4.1.1,4.4.1.28	435.488	0		R408	0	cys__L_c + h2o_c --> h2s_c + nh4_c + pyr_c	4.4.1.1,4.4.1.28	435.488	0		R408	0	cys__L_c + h2o_c --> h2s_c + nh4_c + pyr_c	4.4.1.1,4.4.1.28	435.488	0		R408
R409	0	cys__L_m + h2o_m --> h2s_m + nh4_m + pyr_m	4.4.1.1,4.4.1.28	558.354	0		R409	0	cys__L_m + h2o_m --> h2s_m + nh4_m + pyr_m	4.4.1.1,4.4.1.28	558.354	0		R409	0	cys__L_m + h2o_m --> h2s_m + nh4_m + pyr_m	4.4.1.1,4.4.1.28	558.354	0		R409	0	cys__L_m + h2o_m --> h2s_m + nh4_m + pyr_m	4.4.1.1,4.4.1.28	558.354	0		R409	0	cys__L_m + h2o_m --> h2s_m + nh4_m + pyr_m	4.4.1.1,4.4.1.28	558.354	0		R409	0	cys__L_m + h2o_m --> h2s_m + nh4_m + pyr_m	4.4.1.1,4.4.1.28	558.354	0		R409	0	cys__L_m + h2o_m --> h2s_m + nh4_m + pyr_m	4.4.1.1,4.4.1.28	558.354	0		R409
R410_num1	0	h2o_c + suchms_c --> 2obut_c + h_c + nh4_c + succ_c		380.743	0		R410_num1	0	h2o_c + suchms_c --> 2obut_c + h_c + nh4_c + succ_c		380.743	0		R410_num1	0	h2o_c + suchms_c --> 2obut_c + h_c + nh4_c + succ_c		380.743	0		R410_num1	0	h2o_c + suchms_c --> 2obut_c + h_c + nh4_c + succ_c		380.743	0		R410_num1	0	h2o_c + suchms_c --> 2obut_c + h_c + nh4_c + succ_c		380.743	0		R410_num1	0	h2o_c + suchms_c --> 2obut_c + h_c + nh4_c + succ_c		380.743	0		R410_num1	0	h2o_c + suchms_c --> 2obut_c + h_c + nh4_c + succ_c		380.743	0		R410_num1
R411_num1	0	cys__L_c + suchms_c --> cyst__L_c + h_c + succ_c	2.5.1.48	416.311	0		R411_num1	0	cys__L_c + suchms_c --> cyst__L_c + h_c + succ_c	2.5.1.48	416.311	0		R411_num1	0	cys__L_c + suchms_c --> cyst__L_c + h_c + succ_c	2.5.1.48	416.311	0		R411_num1	0	cys__L_c + suchms_c --> cyst__L_c + h_c + succ_c	2.5.1.48	416.311	0		R411_num1	0	cys__L_c + suchms_c --> cyst__L_c + h_c + succ_c	2.5.1.48	416.311	0		R411_num1	0	cys__L_c + suchms_c --> cyst__L_c + h_c + succ_c	2.5.1.48	416.311	0		R411_num1	0	cys__L_c + suchms_c --> cyst__L_c + h_c + succ_c	2.5.1.48	416.311	0		R411_num1
R412	0	akg_c + cys__L_c --> glu__L_c + mercppyr_c	2.6.1.1	7305.86	0		R412	0	akg_c + cys__L_c --> glu__L_c + mercppyr_c	2.6.1.1	7305.86	0		R412	0	akg_c + cys__L_c --> glu__L_c + mercppyr_c	2.6.1.1	7305.86	0		R412	0	akg_c + cys__L_c --> glu__L_c + mercppyr_c	2.6.1.1	7305.86	0		R412	0	akg_c + cys__L_c --> glu__L_c + mercppyr_c	2.6.1.1	7305.86	0		R412	0	akg_c + cys__L_c --> glu__L_c + mercppyr_c	2.6.1.1	7305.86	0		R412	0	akg_c + cys__L_c --> glu__L_c + mercppyr_c	2.6.1.1	7305.86	0		R412
R413	0	akg_m + cys__L_m --> glu__L_m + mercppyr_m	2.6.1.1	8150.09	0		R413	0	akg_m + cys__L_m --> glu__L_m + mercppyr_m	2.6.1.1	8150.09	0		R413	0	akg_m + cys__L_m --> glu__L_m + mercppyr_m	2.6.1.1	8150.09	0		R413	0	akg_m + cys__L_m --> glu__L_m + mercppyr_m	2.6.1.1	8150.09	0		R413	0	akg_m + cys__L_m --> glu__L_m + mercppyr_m	2.6.1.1	8150.09	0		R413	0	akg_m + cys__L_m --> glu__L_m + mercppyr_m	2.6.1.1	8150.09	0		R413	0	akg_m + cys__L_m --> glu__L_m + mercppyr_m	2.6.1.1	8150.09	0		R413
R414	0	metox_c + trdrd_c --> h2o_c + met__L_c + trdox_c	1.8.4.13,1.8.4.14	890.001	0		R414	0	metox_c + trdrd_c --> h2o_c + met__L_c + trdox_c	1.8.4.13,1.8.4.14	890.001	0		R414	0	metox_c + trdrd_c --> h2o_c + met__L_c + trdox_c	1.8.4.13,1.8.4.14	890.001	0		R414	0	metox_c + trdrd_c --> h2o_c + met__L_c + trdox_c	1.8.4.13,1.8.4.14	890.001	0		R414	0	metox_c + trdrd_c --> h2o_c + met__L_c + trdox_c	1.8.4.13,1.8.4.14	890.001	0		R414	0	metox_c + trdrd_c --> h2o_c + met__L_c + trdox_c	1.8.4.13,1.8.4.14	890.001	0		R414	0	metox_c + trdrd_c --> h2o_c + met__L_c + trdox_c	1.8.4.13,1.8.4.14	890.001	0		R414
R415_num1	0	achms_c + trdrd_c + tsul_c --> ac_c + 2.0 h_c + hcys__L_c + so3_c + trdox_c		338.001	0		R415_num1	0	achms_c + trdrd_c + tsul_c --> ac_c + 2.0 h_c + hcys__L_c + so3_c + trdox_c		338.001	0		R415_num1	0	achms_c + trdrd_c + tsul_c --> ac_c + 2.0 h_c + hcys__L_c + so3_c + trdox_c		338.001	0		R415_num1	0	achms_c + trdrd_c + tsul_c --> ac_c + 2.0 h_c + hcys__L_c + so3_c + trdox_c		338.001	0		R415_num1	0	achms_c + trdrd_c + tsul_c --> ac_c + 2.0 h_c + hcys__L_c + so3_c + trdox_c		338.001	0		R415_num1	0	achms_c + trdrd_c + tsul_c --> ac_c + 2.0 h_c + hcys__L_c + so3_c + trdox_c		338.001	0		R415_num1	0	achms_c + trdrd_c + tsul_c --> ac_c + 2.0 h_c + hcys__L_c + so3_c + trdox_c		338.001	0		R415_num1
R416_num1	0	mercplac_c + nad_c --> 2.0 h_c + mercppyr_c + nadh_c	1.1.1.27	54717.3	0		R416_num1	0	mercplac_c + nad_c --> 2.0 h_c + mercppyr_c + nadh_c	1.1.1.27	54717.3	0		R416_num1	0	mercplac_c + nad_c --> 2.0 h_c + mercppyr_c + nadh_c	1.1.1.27	54717.3	0		R416_num1	0	mercplac_c + nad_c --> 2.0 h_c + mercppyr_c + nadh_c	1.1.1.27	54717.3	0		R416_num1	0	mercplac_c + nad_c --> 2.0 h_c + mercppyr_c + nadh_c	1.1.1.27	54717.3	0		R416_num1	0	mercplac_c + nad_c --> 2.0 h_c + mercppyr_c + nadh_c	1.1.1.27	54717.3	0		R416_num1	0	mercplac_c + nad_c --> 2.0 h_c + mercppyr_c + nadh_c	1.1.1.27	54717.3	0		R416_num1
R417	0	mercppyr_m + trdrd_m --> h2s_m + pyr_m + trdox_m	2.8.1.2	1169.47	0		R417	0	mercppyr_m + trdrd_m --> h2s_m + pyr_m + trdox_m	2.8.1.2	1169.47	0		R417	0	mercppyr_m + trdrd_m --> h2s_m + pyr_m + trdox_m	2.8.1.2	1169.47	0		R417	0	mercppyr_m + trdrd_m --> h2s_m + pyr_m + trdox_m	2.8.1.2	1169.47	0		R417	0	mercppyr_m + trdrd_m --> h2s_m + pyr_m + trdox_m	2.8.1.2	1169.47	0		R417	0	mercppyr_m + trdrd_m --> h2s_m + pyr_m + trdox_m	2.8.1.2	1169.47	0		R417	0	mercppyr_m + trdrd_m --> h2s_m + pyr_m + trdox_m	2.8.1.2	1169.47	0		R417
R418_num1	0	amet_c + dnacyt_c --> ahcys_c + dna5mtc_c	2.1.1.37	81.3897	0		R418_num1	0	amet_c + dnacyt_c --> ahcys_c + dna5mtc_c	2.1.1.37	81.3897	0		R418_num1	0	amet_c + dnacyt_c --> ahcys_c + dna5mtc_c	2.1.1.37	81.3897	0		R418_num1	0	amet_c + dnacyt_c --> ahcys_c + dna5mtc_c	2.1.1.37	81.3897	0		R418_num1	0	amet_c + dnacyt_c --> ahcys_c + dna5mtc_c	2.1.1.37	81.3897	0		R418_num1	0	amet_c + dnacyt_c --> ahcys_c + dna5mtc_c	2.1.1.37	81.3897	0		R418_num1	0	amet_c + dnacyt_c --> ahcys_c + dna5mtc_c	2.1.1.37	81.3897	0		R418_num1
R419_num1	0	C02356_m + akg_m --> 2obut_m + glu__L_m	2.6.1.42	3873.74	0		R419_num1	0	C02356_m + akg_m --> 2obut_m + glu__L_m	2.6.1.42	3873.74	0		R419_num1	0	C02356_m + akg_m --> 2obut_m + glu__L_m	2.6.1.42	3873.74	0		R419_num1	0	C02356_m + akg_m --> 2obut_m + glu__L_m	2.6.1.42	3873.74	0		R419_num1	0	C02356_m + akg_m --> 2obut_m + glu__L_m	2.6.1.42	3873.74	0		R419_num1	0	C02356_m + akg_m --> 2obut_m + glu__L_m	2.6.1.42	3873.74	0		R419_num1	0	C02356_m + akg_m --> 2obut_m + glu__L_m	2.6.1.42	3873.74	0		R419_num1
R420	0	C02356_c + akg_c --> 2obut_c + glu__L_c	2.6.1.42	2437.02	0		R420	0	C02356_c + akg_c --> 2obut_c + glu__L_c	2.6.1.42	2437.02	0		R420	0	C02356_c + akg_c --> 2obut_c + glu__L_c	2.6.1.42	2437.02	0		R420	0	C02356_c + akg_c --> 2obut_c + glu__L_c	2.6.1.42	2437.02	0		R420	0	C02356_c + akg_c --> 2obut_c + glu__L_c	2.6.1.42	2437.02	0		R420	0	C02356_c + akg_c --> 2obut_c + glu__L_c	2.6.1.42	2437.02	0		R420	0	C02356_c + akg_c --> 2obut_c + glu__L_c	2.6.1.42	2437.02	0		R420
R421_num1	0	C02356_m + atp_m + glu__L_m --> C21015_m + adp_m + pi_m	6.3.2.2	2409.99	0		R421_num1	0	C02356_m + atp_m + glu__L_m --> C21015_m + adp_m + pi_m	6.3.2.2	2409.99	0		R421_num1	0	C02356_m + atp_m + glu__L_m --> C21015_m + adp_m + pi_m	6.3.2.2	2409.99	0		R421_num1	0	C02356_m + atp_m + glu__L_m --> C21015_m + adp_m + pi_m	6.3.2.2	2409.99	0		R421_num1	0	C02356_m + atp_m + glu__L_m --> C21015_m + adp_m + pi_m	6.3.2.2	2409.99	0		R421_num1	0	C02356_m + atp_m + glu__L_m --> C21015_m + adp_m + pi_m	6.3.2.2	2409.99	0		R421_num1	0	C02356_m + atp_m + glu__L_m --> C21015_m + adp_m + pi_m	6.3.2.2	2409.99	0		R421_num1
R422_num1	0	Lcyst_c + akg_c --> 3spyr_c + glu__L_c	2.6.1.1	8150.09	0		R422_num1	0	Lcyst_c + akg_c --> 3spyr_c + glu__L_c	2.6.1.1	8150.09	0		R422_num1	0	Lcyst_c + akg_c --> 3spyr_c + glu__L_c	2.6.1.1	8150.09	0		R422_num1	0	Lcyst_c + akg_c --> 3spyr_c + glu__L_c	2.6.1.1	8150.09	0		R422_num1	0	Lcyst_c + akg_c --> 3spyr_c + glu__L_c	2.6.1.1	8150.09	0		R422_num1	0	Lcyst_c + akg_c --> 3spyr_c + glu__L_c	2.6.1.1	8150.09	0		R422_num1	0	Lcyst_c + akg_c --> 3spyr_c + glu__L_c	2.6.1.1	8150.09	0		R422_num1
R423	0	dkmpp_c + h2o_c --> dhmtp_c + h_c + pi_c	3.1.3.77				R423	0	dkmpp_c + h2o_c --> dhmtp_c + h_c + pi_c	3.1.3.77				R423	0	dkmpp_c + h2o_c --> dhmtp_c + h_c + pi_c	3.1.3.77				R423	0	dkmpp_c + h2o_c --> dhmtp_c + h_c + pi_c	3.1.3.77				R423	0	dkmpp_c + h2o_c --> dhmtp_c + h_c + pi_c	3.1.3.77				R423	0	dkmpp_c + h2o_c --> dhmtp_c + h_c + pi_c	3.1.3.77				R423	0	dkmpp_c + h2o_c --> dhmtp_c + h_c + pi_c	3.1.3.77				R423
R424	0	5mdru1p_c --> dkmpp_c + h2o_c	4.2.1.109	816.56	0		R424	0	5mdru1p_c --> dkmpp_c + h2o_c	4.2.1.109	816.56	0		R424	0	5mdru1p_c --> dkmpp_c + h2o_c	4.2.1.109	816.56	0		R424	0	5mdru1p_c --> dkmpp_c + h2o_c	4.2.1.109	816.56	0		R424	0	5mdru1p_c --> dkmpp_c + h2o_c	4.2.1.109	816.56	0		R424	0	5mdru1p_c --> dkmpp_c + h2o_c	4.2.1.109	816.56	0		R424	0	5mdru1p_c --> dkmpp_c + h2o_c	4.2.1.109	816.56	0		R424
R425	0	5mta_m + pi_m --> 5mdr1p_m + ade_m	2.4.2.28	368.728	0		R425	0	5mta_m + pi_m --> 5mdr1p_m + ade_m	2.4.2.28	368.728	0		R425	0	5mta_m + pi_m --> 5mdr1p_m + ade_m	2.4.2.28	368.728	0		R425	0	5mta_m + pi_m --> 5mdr1p_m + ade_m	2.4.2.28	368.728	0		R425	0	5mta_m + pi_m --> 5mdr1p_m + ade_m	2.4.2.28	368.728	0		R425	0	5mta_m + pi_m --> 5mdr1p_m + ade_m	2.4.2.28	368.728	0		R425	0	5mta_m + pi_m --> 5mdr1p_m + ade_m	2.4.2.28	368.728	0		R425
R426	0	5mdr1p_m --> 5mdru1p_m	5.3.1.23				R426	0	5mdr1p_m --> 5mdru1p_m	5.3.1.23				R426	0	5mdr1p_m --> 5mdru1p_m	5.3.1.23				R426	0	5mdr1p_m --> 5mdru1p_m	5.3.1.23				R426	0	5mdr1p_m --> 5mdru1p_m	5.3.1.23				R426	0	5mdr1p_m --> 5mdru1p_m	5.3.1.23				R426	0	5mdr1p_m --> 5mdru1p_m	5.3.1.23				R426
R427	0	amet_c + h_c --> ametam_c + co2_c	4.1.1.50	47.3866	0		R427	0	amet_c + h_c --> ametam_c + co2_c	4.1.1.50	47.3866	0		R427	0	amet_c + h_c --> ametam_c + co2_c	4.1.1.50	47.3866	0		R427	0	amet_c + h_c --> ametam_c + co2_c	4.1.1.50	47.3866	0		R427	0	amet_c + h_c --> ametam_c + co2_c	4.1.1.50	47.3866	0		R427	0	amet_c + h_c --> ametam_c + co2_c	4.1.1.50	47.3866	0		R427	0	amet_c + h_c --> ametam_c + co2_c	4.1.1.50	47.3866	0		R427
R428	-2.91401e-17	ametam_c + ptrc_c --> 5mta_c + h_c + spmd_c	2.5.1.16	103.559	-2.81386e-19		R428	0	ametam_c + ptrc_c --> 5mta_c + h_c + spmd_c	2.5.1.16	103.559	0		R428	0	ametam_c + ptrc_c --> 5mta_c + h_c + spmd_c	2.5.1.16	103.559	0		R428	6.68835e-15	ametam_c + ptrc_c --> 5mta_c + h_c + spmd_c	2.5.1.16	103.559	6.45848e-17		R428	0	ametam_c + ptrc_c --> 5mta_c + h_c + spmd_c	2.5.1.16	103.559	0		R428	0	ametam_c + ptrc_c --> 5mta_c + h_c + spmd_c	2.5.1.16	103.559	0		R428	0	ametam_c + ptrc_c --> 5mta_c + h_c + spmd_c	2.5.1.16	103.559	0		R428
R429	2.91401e-17	ametam_c + spmd_c --> 5mta_c + h_c + sprm_c	2.5.1.22	109.912	2.65122e-19		R429	0	ametam_c + spmd_c --> 5mta_c + h_c + sprm_c	2.5.1.22	109.912	0		R429	0	ametam_c + spmd_c --> 5mta_c + h_c + sprm_c	2.5.1.22	109.912	0		R429	-6.68835e-15	ametam_c + spmd_c --> 5mta_c + h_c + sprm_c	2.5.1.22	109.912	-6.08518e-17		R429	0	ametam_c + spmd_c --> 5mta_c + h_c + sprm_c	2.5.1.22	109.912	0		R429	0	ametam_c + spmd_c --> 5mta_c + h_c + sprm_c	2.5.1.22	109.912	0		R429	0	ametam_c + spmd_c --> 5mta_c + h_c + sprm_c	2.5.1.22	109.912	0		R429
R430	0	CPD_367_c + nad_c --> 3spyr_c + h_c + nadh_c	1.1.1.337	990.209	0		R430	0	CPD_367_c + nad_c --> 3spyr_c + h_c + nadh_c	1.1.1.337	990.209	0		R430	0	CPD_367_c + nad_c --> 3spyr_c + h_c + nadh_c	1.1.1.337	990.209	0		R430	0	CPD_367_c + nad_c --> 3spyr_c + h_c + nadh_c	1.1.1.337	990.209	0		R430	0	CPD_367_c + nad_c --> 3spyr_c + h_c + nadh_c	1.1.1.337	990.209	0		R430	0	CPD_367_c + nad_c --> 3spyr_c + h_c + nadh_c	1.1.1.337	990.209	0		R430	0	CPD_367_c + nad_c --> 3spyr_c + h_c + nadh_c	1.1.1.337	990.209	0		R430
R431	0	5mthf_c + hcys__L_c --> met__L_c + thf_c	2.1.1.13	45.267	0		R431	0	5mthf_c + hcys__L_c --> met__L_c + thf_c	2.1.1.13	45.267	0		R431	0	5mthf_c + hcys__L_c --> met__L_c + thf_c	2.1.1.13	45.267	0		R431	0	5mthf_c + hcys__L_c --> met__L_c + thf_c	2.1.1.13	45.267	0		R431	0	5mthf_c + hcys__L_c --> met__L_c + thf_c	2.1.1.13	45.267	0		R431	0	5mthf_c + hcys__L_c --> met__L_c + thf_c	2.1.1.13	45.267	0		R431	0	5mthf_c + hcys__L_c --> met__L_c + thf_c	2.1.1.13	45.267	0		R431
R432_num1	0	acser_c + h2s_c --> ac_c + cys__L_c + h_c	2.5.1.47,2.5.1.65	485.432	0		R432_num1	0	acser_c + h2s_c --> ac_c + cys__L_c + h_c	2.5.1.47,2.5.1.65	485.432	0		R432_num1	0	acser_c + h2s_c --> ac_c + cys__L_c + h_c	2.5.1.47,2.5.1.65	485.432	0		R432_num1	0	acser_c + h2s_c --> ac_c + cys__L_c + h_c	2.5.1.47,2.5.1.65	485.432	0		R432_num1	0	acser_c + h2s_c --> ac_c + cys__L_c + h_c	2.5.1.47,2.5.1.65	485.432	0		R432_num1	0	acser_c + h2s_c --> ac_c + cys__L_c + h_c	2.5.1.47,2.5.1.65	485.432	0		R432_num1	0	acser_c + h2s_c --> ac_c + cys__L_c + h_c	2.5.1.47,2.5.1.65	485.432	0		R432_num1
R433	0	hom__L_c + succoa_c --> coa_c + suchms_c	2.3.1.46	549.081	0		R433	0	hom__L_c + succoa_c --> coa_c + suchms_c	2.3.1.46	549.081	0		R433	0	hom__L_c + succoa_c --> coa_c + suchms_c	2.3.1.46	549.081	0		R433	0	hom__L_c + succoa_c --> coa_c + suchms_c	2.3.1.46	549.081	0		R433	0	hom__L_c + succoa_c --> coa_c + suchms_c	2.3.1.46	549.081	0		R433	0	hom__L_c + succoa_c --> coa_c + suchms_c	2.3.1.46	549.081	0		R433	0	hom__L_c + succoa_c --> coa_c + suchms_c	2.3.1.46	549.081	0		R433
R434	0	hom__L_m + succoa_m --> coa_m + suchms_m	2.3.1.46	388.229	0		R434	0	hom__L_m + succoa_m --> coa_m + suchms_m	2.3.1.46	388.229	0		R434	0	hom__L_m + succoa_m --> coa_m + suchms_m	2.3.1.46	388.229	0		R434	0	hom__L_m + succoa_m --> coa_m + suchms_m	2.3.1.46	388.229	0		R434	0	hom__L_m + succoa_m --> coa_m + suchms_m	2.3.1.46	388.229	0		R434	0	hom__L_m + succoa_m --> coa_m + suchms_m	2.3.1.46	388.229	0		R434	0	hom__L_m + succoa_m --> coa_m + suchms_m	2.3.1.46	388.229	0		R434
R435_num1	0	h2s_c + suchms_c --> h_c + hcys__L_c + succ_c	2.5.1.48	455.2	0		R435_num1	0	h2s_c + suchms_c --> h_c + hcys__L_c + succ_c	2.5.1.48	455.2	0		R435_num1	0	h2s_c + suchms_c --> h_c + hcys__L_c + succ_c	2.5.1.48	455.2	0		R435_num1	0	h2s_c + suchms_c --> h_c + hcys__L_c + succ_c	2.5.1.48	455.2	0		R435_num1	0	h2s_c + suchms_c --> h_c + hcys__L_c + succ_c	2.5.1.48	455.2	0		R435_num1	0	h2s_c + suchms_c --> h_c + hcys__L_c + succ_c	2.5.1.48	455.2	0		R435_num1	0	h2s_c + suchms_c --> h_c + hcys__L_c + succ_c	2.5.1.48	455.2	0		R435_num1
R436	0	cys__L_c + o2_c --> 3SALA_c + h_c	1.13.11.20	459.571	0		R436	0	cys__L_c + o2_c --> 3SALA_c + h_c	1.13.11.20	459.571	0		R436	0	cys__L_c + o2_c --> 3SALA_c + h_c	1.13.11.20	459.571	0		R436	0	cys__L_c + o2_c --> 3SALA_c + h_c	1.13.11.20	459.571	0		R436	0	cys__L_c + o2_c --> 3SALA_c + h_c	1.13.11.20	459.571	0		R436	0	cys__L_c + o2_c --> 3SALA_c + h_c	1.13.11.20	459.571	0		R436	0	cys__L_c + o2_c --> 3SALA_c + h_c	1.13.11.20	459.571	0		R436
R437	0	D_ARABINOFURANOSE_c + nad_c --> Dara14lac_c + h_c + nadh_c	1.1.1.116				R437	0	D_ARABINOFURANOSE_c + nad_c --> Dara14lac_c + h_c + nadh_c	1.1.1.116				R437	0	D_ARABINOFURANOSE_c + nad_c --> Dara14lac_c + h_c + nadh_c	1.1.1.116				R437	0	D_ARABINOFURANOSE_c + nad_c --> Dara14lac_c + h_c + nadh_c	1.1.1.116				R437	0	D_ARABINOFURANOSE_c + nad_c --> Dara14lac_c + h_c + nadh_c	1.1.1.116				R437	0	D_ARABINOFURANOSE_c + nad_c --> Dara14lac_c + h_c + nadh_c	1.1.1.116				R437	0	D_ARABINOFURANOSE_c + nad_c --> Dara14lac_c + h_c + nadh_c	1.1.1.116				R437
R438	0	galt_c + nad_c --> CPD_13036_c + h_c + nadh_c		5259.98	0		R438	0	galt_c + nad_c --> CPD_13036_c + h_c + nadh_c		5259.98	0		R438	0	galt_c + nad_c --> CPD_13036_c + h_c + nadh_c		5259.98	0		R438	0	galt_c + nad_c --> CPD_13036_c + h_c + nadh_c		5259.98	0		R438	0	galt_c + nad_c --> CPD_13036_c + h_c + nadh_c		5259.98	0		R438	0	galt_c + nad_c --> CPD_13036_c + h_c + nadh_c		5259.98	0		R438	0	galt_c + nad_c --> CPD_13036_c + h_c + nadh_c		5259.98	0		R438
R439	0	CPD_13036_m + h_m + nadph_m --> nadp_m + sbt__D_m		1627.68	0		R439	0	CPD_13036_m + h_m + nadph_m --> nadp_m + sbt__D_m		1627.68	0		R439	0	CPD_13036_m + h_m + nadph_m --> nadp_m + sbt__D_m		1627.68	0		R439	0	CPD_13036_m + h_m + nadph_m --> nadp_m + sbt__D_m		1627.68	0		R439	2.12006e-30	CPD_13036_m + h_m + nadph_m --> nadp_m + sbt__D_m		1627.68	1.30251e-33		R439	0	CPD_13036_m + h_m + nadph_m --> nadp_m + sbt__D_m		1627.68	0		R439	0	CPD_13036_m + h_m + nadph_m --> nadp_m + sbt__D_m		1627.68	0		R439
R440_num1	0	2.0 h_c + nadph_c + o2_c + salc_c --> catechol_c + co2_c + h2o_c + nadp_c	1.14.13.1	164.356	0		R440_num1	0	2.0 h_c + nadph_c + o2_c + salc_c --> catechol_c + co2_c + h2o_c + nadp_c	1.14.13.1	164.356	0		R440_num1	0	2.0 h_c + nadph_c + o2_c + salc_c --> catechol_c + co2_c + h2o_c + nadp_c	1.14.13.1	164.356	0		R440_num1	0	2.0 h_c + nadph_c + o2_c + salc_c --> catechol_c + co2_c + h2o_c + nadp_c	1.14.13.1	164.356	0		R440_num1	0	2.0 h_c + nadph_c + o2_c + salc_c --> catechol_c + co2_c + h2o_c + nadp_c	1.14.13.1	164.356	0		R440_num1	0	2.0 h_c + nadph_c + o2_c + salc_c --> catechol_c + co2_c + h2o_c + nadp_c	1.14.13.1	164.356	0		R440_num1	0	2.0 h_c + nadph_c + o2_c + salc_c --> catechol_c + co2_c + h2o_c + nadp_c	1.14.13.1	164.356	0		R440_num1
R441	0	h_c + pphn_c --> co2_c + h2o_c + phpyr_c	4.2.1.51	450.936	0		R441	0	h_c + pphn_c --> co2_c + h2o_c + phpyr_c	4.2.1.51	450.936	0		R441	0	h_c + pphn_c --> co2_c + h2o_c + phpyr_c	4.2.1.51	450.936	0		R441	0	h_c + pphn_c --> co2_c + h2o_c + phpyr_c	4.2.1.51	450.936	0		R441	0	h_c + pphn_c --> co2_c + h2o_c + phpyr_c	4.2.1.51	450.936	0		R441	0	h_c + pphn_c --> co2_c + h2o_c + phpyr_c	4.2.1.51	450.936	0		R441	0	h_c + pphn_c --> co2_c + h2o_c + phpyr_c	4.2.1.51	450.936	0		R441
R442_num1	0	frdp_c + 13.0 ipdp_c --> CPD_10712_c + 13.0 ppi_c	2.5.1.87				R442_num1	0	frdp_c + 13.0 ipdp_c --> CPD_10712_c + 13.0 ppi_c	2.5.1.87				R442_num1	0	frdp_c + 13.0 ipdp_c --> CPD_10712_c + 13.0 ppi_c	2.5.1.87				R442_num1	0	frdp_c + 13.0 ipdp_c --> CPD_10712_c + 13.0 ppi_c	2.5.1.87				R442_num1	0	frdp_c + 13.0 ipdp_c --> CPD_10712_c + 13.0 ppi_c	2.5.1.87				R442_num1	0	frdp_c + 13.0 ipdp_c --> CPD_10712_c + 13.0 ppi_c	2.5.1.87				R442_num1	0	frdp_c + 13.0 ipdp_c --> CPD_10712_c + 13.0 ppi_c	2.5.1.87				R442_num1
R443	0	CPD0_2367_c + atp_c --> 5flurimp_c + adp_c + h_c	2.7.1.48	1376.62	0		R443	0	CPD0_2367_c + atp_c --> 5flurimp_c + adp_c + h_c	2.7.1.48	1376.62	0		R443	0	CPD0_2367_c + atp_c --> 5flurimp_c + adp_c + h_c	2.7.1.48	1376.62	0		R443	0	CPD0_2367_c + atp_c --> 5flurimp_c + adp_c + h_c	2.7.1.48	1376.62	0		R443	0	CPD0_2367_c + atp_c --> 5flurimp_c + adp_c + h_c	2.7.1.48	1376.62	0		R443	0	CPD0_2367_c + atp_c --> 5flurimp_c + adp_c + h_c	2.7.1.48	1376.62	0		R443	0	CPD0_2367_c + atp_c --> 5flurimp_c + adp_c + h_c	2.7.1.48	1376.62	0		R443
R444	0	5flurimp_c + atp_c + 3.0 h_c --> C21748_c + adp_c	2.7.4.14	5235.42	0		R444	0	5flurimp_c + atp_c + 3.0 h_c --> C21748_c + adp_c	2.7.4.14	5235.42	0		R444	0	5flurimp_c + atp_c + 3.0 h_c --> C21748_c + adp_c	2.7.4.14	5235.42	0		R444	0	5flurimp_c + atp_c + 3.0 h_c --> C21748_c + adp_c	2.7.4.14	5235.42	0		R444	0	5flurimp_c + atp_c + 3.0 h_c --> C21748_c + adp_c	2.7.4.14	5235.42	0		R444	0	5flurimp_c + atp_c + 3.0 h_c --> C21748_c + adp_c	2.7.4.14	5235.42	0		R444	0	5flurimp_c + atp_c + 3.0 h_c --> C21748_c + adp_c	2.7.4.14	5235.42	0		R444
R445	0	C04242_c + atp_c + h_c --> C21750_c + adp_c	2.7.4.14	5235.42	0		R445	0	C04242_c + atp_c + h_c --> C21750_c + adp_c	2.7.4.14	5235.42	0		R445	0	C04242_c + atp_c + h_c --> C21750_c + adp_c	2.7.4.14	5235.42	0		R445	0	C04242_c + atp_c + h_c --> C21750_c + adp_c	2.7.4.14	5235.42	0		R445	0	C04242_c + atp_c + h_c --> C21750_c + adp_c	2.7.4.14	5235.42	0		R445	0	C04242_c + atp_c + h_c --> C21750_c + adp_c	2.7.4.14	5235.42	0		R445	0	C04242_c + atp_c + h_c --> C21750_c + adp_c	2.7.4.14	5235.42	0		R445
R446	0	5flura_m + prpp_m --> 5flurimp_m + ppi_m	2.4.2.10	224.892	0		R446	0	5flura_m + prpp_m --> 5flurimp_m + ppi_m	2.4.2.10	224.892	0		R446	0	5flura_m + prpp_m --> 5flurimp_m + ppi_m	2.4.2.10	224.892	0		R446	0	5flura_m + prpp_m --> 5flurimp_m + ppi_m	2.4.2.10	224.892	0		R446	0	5flura_m + prpp_m --> 5flurimp_m + ppi_m	2.4.2.10	224.892	0		R446	0	5flura_m + prpp_m --> 5flurimp_m + ppi_m	2.4.2.10	224.892	0		R446	0	5flura_m + prpp_m --> 5flurimp_m + ppi_m	2.4.2.10	224.892	0		R446
R447	0	C21748_m + trdrd_m --> C21750_m + h2o_m + trdox_m	1.17.4.1	1626.24	0		R447	0	C21748_m + trdrd_m --> C21750_m + h2o_m + trdox_m	1.17.4.1	1626.24	0		R447	0	C21748_m + trdrd_m --> C21750_m + h2o_m + trdox_m	1.17.4.1	1626.24	0		R447	0	C21748_m + trdrd_m --> C21750_m + h2o_m + trdox_m	1.17.4.1	1626.24	0		R447	0	C21748_m + trdrd_m --> C21750_m + h2o_m + trdox_m	1.17.4.1	1626.24	0		R447	0	C21748_m + trdrd_m --> C21750_m + h2o_m + trdox_m	1.17.4.1	1626.24	0		R447	0	C21748_m + trdrd_m --> C21750_m + h2o_m + trdox_m	1.17.4.1	1626.24	0		R447
R448	0	C21748_m + atp_m + h_c --> C21749_m + adp_m	2.7.4.6	4778.12	0		R448	0	C21748_m + atp_m + h_c --> C21749_m + adp_m	2.7.4.6	4778.12	0		R448	0	C21748_m + atp_m + h_c --> C21749_m + adp_m	2.7.4.6	4778.12	0		R448	0	C21748_m + atp_m + h_c --> C21749_m + adp_m	2.7.4.6	4778.12	0		R448	0	C21748_m + atp_m + h_c --> C21749_m + adp_m	2.7.4.6	4778.12	0		R448	0	C21748_m + atp_m + h_c --> C21749_m + adp_m	2.7.4.6	4778.12	0		R448	0	C21748_m + atp_m + h_c --> C21749_m + adp_m	2.7.4.6	4778.12	0		R448
R449	0	C21750_m + atp_m + h_c --> C21751_m + adp_m	2.7.4.6	4778.12	0		R449	0	C21750_m + atp_m + h_c --> C21751_m + adp_m	2.7.4.6	4778.12	0		R449	0	C21750_m + atp_m + h_c --> C21751_m + adp_m	2.7.4.6	4778.12	0		R449	0	C21750_m + atp_m + h_c --> C21751_m + adp_m	2.7.4.6	4778.12	0		R449	0	C21750_m + atp_m + h_c --> C21751_m + adp_m	2.7.4.6	4778.12	0		R449	0	C21750_m + atp_m + h_c --> C21751_m + adp_m	2.7.4.6	4778.12	0		R449	0	C21750_m + atp_m + h_c --> C21751_m + adp_m	2.7.4.6	4778.12	0		R449
R450	0	ser__D_m --> a2m2prpnte_m + h2o_m		4569.09	0		R450	0	ser__D_m --> a2m2prpnte_m + h2o_m		4569.09	0		R450	0	ser__D_m --> a2m2prpnte_m + h2o_m		4569.09	0		R450	0	ser__D_m --> a2m2prpnte_m + h2o_m		4569.09	0		R450	0	ser__D_m --> a2m2prpnte_m + h2o_m		4569.09	0		R450	0	ser__D_m --> a2m2prpnte_m + h2o_m		4569.09	0		R450	0	ser__D_m --> a2m2prpnte_m + h2o_m		4569.09	0		R450
R451_num1	0	ACP_c + 2.0 amet_c + 14.0 h_c + 8.0 malcoa_c + 8.0 nadph_c --> CPD_17994_c + 2.0 ahcys_c + 8.0 co2_c + 8.0 coa_c + 6.0 h2o_c + 8.0 nadp_c		4008.26	0		R451_num1	0	ACP_c + 2.0 amet_c + 14.0 h_c + 8.0 malcoa_c + 8.0 nadph_c --> CPD_17994_c + 2.0 ahcys_c + 8.0 co2_c + 8.0 coa_c + 6.0 h2o_c + 8.0 nadp_c		4008.26	0		R451_num1	0	ACP_c + 2.0 amet_c + 14.0 h_c + 8.0 malcoa_c + 8.0 nadph_c --> CPD_17994_c + 2.0 ahcys_c + 8.0 co2_c + 8.0 coa_c + 6.0 h2o_c + 8.0 nadp_c		4008.26	0		R451_num1	0	ACP_c + 2.0 amet_c + 14.0 h_c + 8.0 malcoa_c + 8.0 nadph_c --> CPD_17994_c + 2.0 ahcys_c + 8.0 co2_c + 8.0 coa_c + 6.0 h2o_c + 8.0 nadp_c		4008.26	0		R451_num1	0	ACP_c + 2.0 amet_c + 14.0 h_c + 8.0 malcoa_c + 8.0 nadph_c --> CPD_17994_c + 2.0 ahcys_c + 8.0 co2_c + 8.0 coa_c + 6.0 h2o_c + 8.0 nadp_c		4008.26	0		R451_num1	0	ACP_c + 2.0 amet_c + 14.0 h_c + 8.0 malcoa_c + 8.0 nadph_c --> CPD_17994_c + 2.0 ahcys_c + 8.0 co2_c + 8.0 coa_c + 6.0 h2o_c + 8.0 nadp_c		4008.26	0		R451_num1	0	ACP_c + 2.0 amet_c + 14.0 h_c + 8.0 malcoa_c + 8.0 nadph_c --> CPD_17994_c + 2.0 ahcys_c + 8.0 co2_c + 8.0 coa_c + 6.0 h2o_c + 8.0 nadp_c		4008.26	0		R451_num1
R452	0	ACP_m + 2.0 amet_m + 14.0 h_m + 8.0 malcoa_m + 8.0 nadph_m --> CPD_17994_m + 2.0 ahcys_m + 8.0 co2_m + 8.0 coa_m + 6.0 h2o_m + 8.0 nadp_m		4220.44	0		R452	0	ACP_m + 2.0 amet_m + 14.0 h_m + 8.0 malcoa_m + 8.0 nadph_m --> CPD_17994_m + 2.0 ahcys_m + 8.0 co2_m + 8.0 coa_m + 6.0 h2o_m + 8.0 nadp_m		4220.44	0		R452	0	ACP_m + 2.0 amet_m + 14.0 h_m + 8.0 malcoa_m + 8.0 nadph_m --> CPD_17994_m + 2.0 ahcys_m + 8.0 co2_m + 8.0 coa_m + 6.0 h2o_m + 8.0 nadp_m		4220.44	0		R452	0	ACP_m + 2.0 amet_m + 14.0 h_m + 8.0 malcoa_m + 8.0 nadph_m --> CPD_17994_m + 2.0 ahcys_m + 8.0 co2_m + 8.0 coa_m + 6.0 h2o_m + 8.0 nadp_m		4220.44	0		R452	0	ACP_m + 2.0 amet_m + 14.0 h_m + 8.0 malcoa_m + 8.0 nadph_m --> CPD_17994_m + 2.0 ahcys_m + 8.0 co2_m + 8.0 coa_m + 6.0 h2o_m + 8.0 nadp_m		4220.44	0		R452	0	ACP_m + 2.0 amet_m + 14.0 h_m + 8.0 malcoa_m + 8.0 nadph_m --> CPD_17994_m + 2.0 ahcys_m + 8.0 co2_m + 8.0 coa_m + 6.0 h2o_m + 8.0 nadp_m		4220.44	0		R452	0	ACP_m + 2.0 amet_m + 14.0 h_m + 8.0 malcoa_m + 8.0 nadph_m --> CPD_17994_m + 2.0 ahcys_m + 8.0 co2_m + 8.0 coa_m + 6.0 h2o_m + 8.0 nadp_m		4220.44	0		R452
R453_num1	0	CPD_17994_c + atp_c + ser__L_c --> ACP_c + CPD_17993_c + amp_c + h_c + ppi_c		95.0731	0		R453_num1	0	CPD_17994_c + atp_c + ser__L_c --> ACP_c + CPD_17993_c + amp_c + h_c + ppi_c		95.0731	0		R453_num1	0	CPD_17994_c + atp_c + ser__L_c --> ACP_c + CPD_17993_c + amp_c + h_c + ppi_c		95.0731	0		R453_num1	0	CPD_17994_c + atp_c + ser__L_c --> ACP_c + CPD_17993_c + amp_c + h_c + ppi_c		95.0731	0		R453_num1	0	CPD_17994_c + atp_c + ser__L_c --> ACP_c + CPD_17993_c + amp_c + h_c + ppi_c		95.0731	0		R453_num1	0	CPD_17994_c + atp_c + ser__L_c --> ACP_c + CPD_17993_c + amp_c + h_c + ppi_c		95.0731	0		R453_num1	0	CPD_17994_c + atp_c + ser__L_c --> ACP_c + CPD_17993_c + amp_c + h_c + ppi_c		95.0731	0		R453_num1
R454_num1	0	CPD_17993_c + amet_c --> CPD_17992_c + ahcys_c + h_c		185.519	0		R454_num1	0	CPD_17993_c + amet_c --> CPD_17992_c + ahcys_c + h_c		185.519	0		R454_num1	0	CPD_17993_c + amet_c --> CPD_17992_c + ahcys_c + h_c		185.519	0		R454_num1	0	CPD_17993_c + amet_c --> CPD_17992_c + ahcys_c + h_c		185.519	0		R454_num1	0	CPD_17993_c + amet_c --> CPD_17992_c + ahcys_c + h_c		185.519	0		R454_num1	0	CPD_17993_c + amet_c --> CPD_17992_c + ahcys_c + h_c		185.519	0		R454_num1	0	CPD_17993_c + amet_c --> CPD_17992_c + ahcys_c + h_c		185.519	0		R454_num1
R455	0	CPD_15280_c + cys__L_c + o2_c --> CPD_15277_c + h2o_c	1.14.99.51	64.2903	0		R455	0	CPD_15280_c + cys__L_c + o2_c --> CPD_15277_c + h2o_c	1.14.99.51	64.2903	0		R455	0	CPD_15280_c + cys__L_c + o2_c --> CPD_15277_c + h2o_c	1.14.99.51	64.2903	0		R455	0	CPD_15280_c + cys__L_c + o2_c --> CPD_15277_c + h2o_c	1.14.99.51	64.2903	0		R455	0	CPD_15280_c + cys__L_c + o2_c --> CPD_15277_c + h2o_c	1.14.99.51	64.2903	0		R455	0	CPD_15280_c + cys__L_c + o2_c --> CPD_15277_c + h2o_c	1.14.99.51	64.2903	0		R455	0	CPD_15280_c + cys__L_c + o2_c --> CPD_15277_c + h2o_c	1.14.99.51	64.2903	0		R455
R456	0	3.0 amet_c + his__L_c --> CPD_15280_c + 3.0 ahcys_c + 3.0 h_c	2.1.1.44				R456	0	3.0 amet_c + his__L_c --> CPD_15280_c + 3.0 ahcys_c + 3.0 h_c	2.1.1.44				R456	0	3.0 amet_c + his__L_c --> CPD_15280_c + 3.0 ahcys_c + 3.0 h_c	2.1.1.44				R456	2.22756e-14	3.0 amet_c + his__L_c --> CPD_15280_c + 3.0 ahcys_c + 3.0 h_c	2.1.1.44				R456	-5.5283e-32	3.0 amet_c + his__L_c --> CPD_15280_c + 3.0 ahcys_c + 3.0 h_c	2.1.1.44				R456	0	3.0 amet_c + his__L_c --> CPD_15280_c + 3.0 ahcys_c + 3.0 h_c	2.1.1.44				R456	0	3.0 amet_c + his__L_c --> CPD_15280_c + 3.0 ahcys_c + 3.0 h_c	2.1.1.44				R456
R457	0	CPD_15277_c + h2o_c --> CPD_19388_c + nh4_c + pyr_c		1921.71	0		R457	0	CPD_15277_c + h2o_c --> CPD_19388_c + nh4_c + pyr_c		1921.71	0		R457	0	CPD_15277_c + h2o_c --> CPD_19388_c + nh4_c + pyr_c		1921.71	0		R457	0	CPD_15277_c + h2o_c --> CPD_19388_c + nh4_c + pyr_c		1921.71	0		R457	0	CPD_15277_c + h2o_c --> CPD_19388_c + nh4_c + pyr_c		1921.71	0		R457	0	CPD_15277_c + h2o_c --> CPD_19388_c + nh4_c + pyr_c		1921.71	0		R457	0	CPD_15277_c + h2o_c --> CPD_19388_c + nh4_c + pyr_c		1921.71	0		R457
R458	0	accoa_x + ak2lgchol_hs_x --> ALKYL_ACETYL_GLYCERO_PHOSPHOCHOLINES_x + coa_x	2.3.1.67				R458	0	accoa_x + ak2lgchol_hs_x --> ALKYL_ACETYL_GLYCERO_PHOSPHOCHOLINES_x + coa_x	2.3.1.67				R458	0	accoa_x + ak2lgchol_hs_x --> ALKYL_ACETYL_GLYCERO_PHOSPHOCHOLINES_x + coa_x	2.3.1.67				R458	0	accoa_x + ak2lgchol_hs_x --> ALKYL_ACETYL_GLYCERO_PHOSPHOCHOLINES_x + coa_x	2.3.1.67				R458	0	accoa_x + ak2lgchol_hs_x --> ALKYL_ACETYL_GLYCERO_PHOSPHOCHOLINES_x + coa_x	2.3.1.67				R458	0	accoa_x + ak2lgchol_hs_x --> ALKYL_ACETYL_GLYCERO_PHOSPHOCHOLINES_x + coa_x	2.3.1.67				R458	0	accoa_x + ak2lgchol_hs_x --> ALKYL_ACETYL_GLYCERO_PHOSPHOCHOLINES_x + coa_x	2.3.1.67				R458
R459	0	ALKYL_ACETYL_GLYCERO_PHOSPHOCHOLINES_c + h2o_c --> ac_c + ak2lgchol_hs_c + h_c	3.1.1.47	5191.1	0		R459	0	ALKYL_ACETYL_GLYCERO_PHOSPHOCHOLINES_c + h2o_c --> ac_c + ak2lgchol_hs_c + h_c	3.1.1.47	5191.1	0		R459	0	ALKYL_ACETYL_GLYCERO_PHOSPHOCHOLINES_c + h2o_c --> ac_c + ak2lgchol_hs_c + h_c	3.1.1.47	5191.1	0		R459	0	ALKYL_ACETYL_GLYCERO_PHOSPHOCHOLINES_c + h2o_c --> ac_c + ak2lgchol_hs_c + h_c	3.1.1.47	5191.1	0		R459	0	ALKYL_ACETYL_GLYCERO_PHOSPHOCHOLINES_c + h2o_c --> ac_c + ak2lgchol_hs_c + h_c	3.1.1.47	5191.1	0		R459	0	ALKYL_ACETYL_GLYCERO_PHOSPHOCHOLINES_c + h2o_c --> ac_c + ak2lgchol_hs_c + h_c	3.1.1.47	5191.1	0		R459	0	ALKYL_ACETYL_GLYCERO_PHOSPHOCHOLINES_c + h2o_c --> ac_c + ak2lgchol_hs_c + h_c	3.1.1.47	5191.1	0		R459
R460_num1	0	D_3_HYDROXYACYL_COA_c + nad_c --> 3_KETOACYL_COA_c + h_c + nadh_c		4921.13	0		R460_num1	0	D_3_HYDROXYACYL_COA_c + nad_c --> 3_KETOACYL_COA_c + h_c + nadh_c		4921.13	0		R460_num1	0	D_3_HYDROXYACYL_COA_c + nad_c --> 3_KETOACYL_COA_c + h_c + nadh_c		4921.13	0		R460_num1	0	D_3_HYDROXYACYL_COA_c + nad_c --> 3_KETOACYL_COA_c + h_c + nadh_c		4921.13	0		R460_num1	0	D_3_HYDROXYACYL_COA_c + nad_c --> 3_KETOACYL_COA_c + h_c + nadh_c		4921.13	0		R460_num1	0	D_3_HYDROXYACYL_COA_c + nad_c --> 3_KETOACYL_COA_c + h_c + nadh_c		4921.13	0		R460_num1	0	D_3_HYDROXYACYL_COA_c + nad_c --> 3_KETOACYL_COA_c + h_c + nadh_c		4921.13	0		R460_num1
R461	0	CIS_DELTA3_ENOYL_COA_m --> TRANS_D2_ENOYL_COA_m	5.3.3.8	1428.87	0		R461	0	CIS_DELTA3_ENOYL_COA_m --> TRANS_D2_ENOYL_COA_m	5.3.3.8	1428.87	0		R461	0	CIS_DELTA3_ENOYL_COA_m --> TRANS_D2_ENOYL_COA_m	5.3.3.8	1428.87	0		R461	0	CIS_DELTA3_ENOYL_COA_m --> TRANS_D2_ENOYL_COA_m	5.3.3.8	1428.87	0		R461	0	CIS_DELTA3_ENOYL_COA_m --> TRANS_D2_ENOYL_COA_m	5.3.3.8	1428.87	0		R461	0	CIS_DELTA3_ENOYL_COA_m --> TRANS_D2_ENOYL_COA_m	5.3.3.8	1428.87	0		R461	0	CIS_DELTA3_ENOYL_COA_m --> TRANS_D2_ENOYL_COA_m	5.3.3.8	1428.87	0		R461
R462	0	TRANS_3_CIS_5_DIENOYL_COA_c --> TETRADEHYDROACYL_COA_c	5.3.3.21				R462	0	TRANS_3_CIS_5_DIENOYL_COA_c --> TETRADEHYDROACYL_COA_c	5.3.3.21				R462	0	TRANS_3_CIS_5_DIENOYL_COA_c --> TETRADEHYDROACYL_COA_c	5.3.3.21				R462	0	TRANS_3_CIS_5_DIENOYL_COA_c --> TETRADEHYDROACYL_COA_c	5.3.3.21				R462	0	TRANS_3_CIS_5_DIENOYL_COA_c --> TETRADEHYDROACYL_COA_c	5.3.3.21				R462	0	TRANS_3_CIS_5_DIENOYL_COA_c --> TETRADEHYDROACYL_COA_c	5.3.3.21				R462	0	TRANS_3_CIS_5_DIENOYL_COA_c --> TETRADEHYDROACYL_COA_c	5.3.3.21				R462
R463	0	TRANS_2_CIS_5_DIENOYL_COA_m --> TRANS_3_CIS_5_DIENOYL_COA_m	5.3.3.8	1428.87	0		R463	0	TRANS_2_CIS_5_DIENOYL_COA_m --> TRANS_3_CIS_5_DIENOYL_COA_m	5.3.3.8	1428.87	0		R463	0	TRANS_2_CIS_5_DIENOYL_COA_m --> TRANS_3_CIS_5_DIENOYL_COA_m	5.3.3.8	1428.87	0		R463	0	TRANS_2_CIS_5_DIENOYL_COA_m --> TRANS_3_CIS_5_DIENOYL_COA_m	5.3.3.8	1428.87	0		R463	0	TRANS_2_CIS_5_DIENOYL_COA_m --> TRANS_3_CIS_5_DIENOYL_COA_m	5.3.3.8	1428.87	0		R463	0	TRANS_2_CIS_5_DIENOYL_COA_m --> TRANS_3_CIS_5_DIENOYL_COA_m	5.3.3.8	1428.87	0		R463	0	TRANS_2_CIS_5_DIENOYL_COA_m --> TRANS_3_CIS_5_DIENOYL_COA_m	5.3.3.8	1428.87	0		R463
R464	0	CIS_5_ENOYL_COA_m + o2_m --> TRANS_2_CIS_5_DIENOYL_COA_m + h2o2_m	1.3.3.6	754.355	0		R464	0	CIS_5_ENOYL_COA_m + o2_m --> TRANS_2_CIS_5_DIENOYL_COA_m + h2o2_m	1.3.3.6	754.355	0		R464	0	CIS_5_ENOYL_COA_m + o2_m --> TRANS_2_CIS_5_DIENOYL_COA_m + h2o2_m	1.3.3.6	754.355	0		R464	0	CIS_5_ENOYL_COA_m + o2_m --> TRANS_2_CIS_5_DIENOYL_COA_m + h2o2_m	1.3.3.6	754.355	0		R464	0	CIS_5_ENOYL_COA_m + o2_m --> TRANS_2_CIS_5_DIENOYL_COA_m + h2o2_m	1.3.3.6	754.355	0		R464	0	CIS_5_ENOYL_COA_m + o2_m --> TRANS_2_CIS_5_DIENOYL_COA_m + h2o2_m	1.3.3.6	754.355	0		R464	0	CIS_5_ENOYL_COA_m + o2_m --> TRANS_2_CIS_5_DIENOYL_COA_m + h2o2_m	1.3.3.6	754.355	0		R464
R465_num1	0	ACP_c + malcoa_c --> coa_c + malACP_c	2.3.1.39,2.3.1.85,2.3.1.86,2.3.1.-	2398.48	0		R465_num1	0	ACP_c + malcoa_c --> coa_c + malACP_c	2.3.1.39,2.3.1.85,2.3.1.86,2.3.1.-	2398.48	0		R465_num1	0	ACP_c + malcoa_c --> coa_c + malACP_c	2.3.1.39,2.3.1.85,2.3.1.86,2.3.1.-	2398.48	0		R465_num1	0	ACP_c + malcoa_c --> coa_c + malACP_c	2.3.1.39,2.3.1.85,2.3.1.86,2.3.1.-	2398.48	0		R465_num1	0	ACP_c + malcoa_c --> coa_c + malACP_c	2.3.1.39,2.3.1.85,2.3.1.86,2.3.1.-	2398.48	0		R465_num1	0	ACP_c + malcoa_c --> coa_c + malACP_c	2.3.1.39,2.3.1.85,2.3.1.86,2.3.1.-	2398.48	0		R465_num1	0	ACP_c + malcoa_c --> coa_c + malACP_c	2.3.1.39,2.3.1.85,2.3.1.86,2.3.1.-	2398.48	0		R465_num1
R466_num1	0	ACP_c + accoa_c --> acACP_c + coa_c	2.3.1.38,2.3.1.85,2.3.1.86,2.3.1.-	2398.48	0		R466_num1	0	ACP_c + accoa_c --> acACP_c + coa_c	2.3.1.38,2.3.1.85,2.3.1.86,2.3.1.-	2398.48	0		R466_num1	0	ACP_c + accoa_c --> acACP_c + coa_c	2.3.1.38,2.3.1.85,2.3.1.86,2.3.1.-	2398.48	0		R466_num1	0	ACP_c + accoa_c --> acACP_c + coa_c	2.3.1.38,2.3.1.85,2.3.1.86,2.3.1.-	2398.48	0		R466_num1	0	ACP_c + accoa_c --> acACP_c + coa_c	2.3.1.38,2.3.1.85,2.3.1.86,2.3.1.-	2398.48	0		R466_num1	0	ACP_c + accoa_c --> acACP_c + coa_c	2.3.1.38,2.3.1.85,2.3.1.86,2.3.1.-	2398.48	0		R466_num1	0	ACP_c + accoa_c --> acACP_c + coa_c	2.3.1.38,2.3.1.85,2.3.1.86,2.3.1.-	2398.48	0		R466_num1
R467_num1	0	acACP_c + malACP_c --> ACP_c + actACP_c + co2_c	2.3.1.41,2.3.1.85,2.3.1.86,2.3.1.179	392.736	0		R467_num1	0	acACP_c + malACP_c --> ACP_c + actACP_c + co2_c	2.3.1.41,2.3.1.85,2.3.1.86,2.3.1.179	392.736	0		R467_num1	0	acACP_c + malACP_c --> ACP_c + actACP_c + co2_c	2.3.1.41,2.3.1.85,2.3.1.86,2.3.1.179	392.736	0		R467_num1	0	acACP_c + malACP_c --> ACP_c + actACP_c + co2_c	2.3.1.41,2.3.1.85,2.3.1.86,2.3.1.179	392.736	0		R467_num1	0	acACP_c + malACP_c --> ACP_c + actACP_c + co2_c	2.3.1.41,2.3.1.85,2.3.1.86,2.3.1.179	392.736	0		R467_num1	0	acACP_c + malACP_c --> ACP_c + actACP_c + co2_c	2.3.1.41,2.3.1.85,2.3.1.86,2.3.1.179	392.736	0		R467_num1	0	acACP_c + malACP_c --> ACP_c + actACP_c + co2_c	2.3.1.41,2.3.1.85,2.3.1.86,2.3.1.179	392.736	0		R467_num1
R468_num1	0	actACP_c + h_c + nadph_c --> C4HACP_c + nadp_c	1.1.1.100,1.1.1.-,2.3.1.85,2.3.1.86	392.736	0		R468_num1	0	actACP_c + h_c + nadph_c --> C4HACP_c + nadp_c	1.1.1.100,1.1.1.-,2.3.1.85,2.3.1.86	392.736	0		R468_num1	0	actACP_c + h_c + nadph_c --> C4HACP_c + nadp_c	1.1.1.100,1.1.1.-,2.3.1.85,2.3.1.86	392.736	0		R468_num1	0	actACP_c + h_c + nadph_c --> C4HACP_c + nadp_c	1.1.1.100,1.1.1.-,2.3.1.85,2.3.1.86	392.736	0		R468_num1	0	actACP_c + h_c + nadph_c --> C4HACP_c + nadp_c	1.1.1.100,1.1.1.-,2.3.1.85,2.3.1.86	392.736	0		R468_num1	0	actACP_c + h_c + nadph_c --> C4HACP_c + nadp_c	1.1.1.100,1.1.1.-,2.3.1.85,2.3.1.86	392.736	0		R468_num1	0	actACP_c + h_c + nadph_c --> C4HACP_c + nadp_c	1.1.1.100,1.1.1.-,2.3.1.85,2.3.1.86	392.736	0		R468_num1
R469_num1	0	C4HACP_c --> C4DACP_c + h2o_c	2.3.1.85,2.3.1.86,2.3.1.-,4.2.1.59	2398.48	0		R469_num1	0	C4HACP_c --> C4DACP_c + h2o_c	2.3.1.85,2.3.1.86,2.3.1.-,4.2.1.59	2398.48	0		R469_num1	0	C4HACP_c --> C4DACP_c + h2o_c	2.3.1.85,2.3.1.86,2.3.1.-,4.2.1.59	2398.48	0		R469_num1	0	C4HACP_c --> C4DACP_c + h2o_c	2.3.1.85,2.3.1.86,2.3.1.-,4.2.1.59	2398.48	0		R469_num1	0	C4HACP_c --> C4DACP_c + h2o_c	2.3.1.85,2.3.1.86,2.3.1.-,4.2.1.59	2398.48	0		R469_num1	0	C4HACP_c --> C4DACP_c + h2o_c	2.3.1.85,2.3.1.86,2.3.1.-,4.2.1.59	2398.48	0		R469_num1	0	C4HACP_c --> C4DACP_c + h2o_c	2.3.1.85,2.3.1.86,2.3.1.-,4.2.1.59	2398.48	0		R469_num1
R470_num1	0	C4DACP_c + h_c + nadph_c --> C40ACP_c + nadp_c	1.3.1.10,1.3.1.39,1.3.1.104,1.3.1.-	2398.48	0		R470_num1	0	C4DACP_c + h_c + nadph_c --> C40ACP_c + nadp_c	1.3.1.10,1.3.1.39,1.3.1.104,1.3.1.-	2398.48	0		R470_num1	0	C4DACP_c + h_c + nadph_c --> C40ACP_c + nadp_c	1.3.1.10,1.3.1.39,1.3.1.104,1.3.1.-	2398.48	0		R470_num1	0	C4DACP_c + h_c + nadph_c --> C40ACP_c + nadp_c	1.3.1.10,1.3.1.39,1.3.1.104,1.3.1.-	2398.48	0		R470_num1	0	C4DACP_c + h_c + nadph_c --> C40ACP_c + nadp_c	1.3.1.10,1.3.1.39,1.3.1.104,1.3.1.-	2398.48	0		R470_num1	0	C4DACP_c + h_c + nadph_c --> C40ACP_c + nadp_c	1.3.1.10,1.3.1.39,1.3.1.104,1.3.1.-	2398.48	0		R470_num1	0	C4DACP_c + h_c + nadph_c --> C40ACP_c + nadp_c	1.3.1.10,1.3.1.39,1.3.1.104,1.3.1.-	2398.48	0		R470_num1
R471	0	acACP_c + 2.0 h_c + malACP_c + 2.0 nadph_c --> ACP_c + C40ACP_c + co2_c + h2o_c + 2.0 nadp_c	2.3.1.85	113.753	0		R471	0	acACP_c + 2.0 h_c + malACP_c + 2.0 nadph_c --> ACP_c + C40ACP_c + co2_c + h2o_c + 2.0 nadp_c	2.3.1.85	113.753	0		R471	0	acACP_c + 2.0 h_c + malACP_c + 2.0 nadph_c --> ACP_c + C40ACP_c + co2_c + h2o_c + 2.0 nadp_c	2.3.1.85	113.753	0		R471	0	acACP_c + 2.0 h_c + malACP_c + 2.0 nadph_c --> ACP_c + C40ACP_c + co2_c + h2o_c + 2.0 nadp_c	2.3.1.85	113.753	0		R471	0	acACP_c + 2.0 h_c + malACP_c + 2.0 nadph_c --> ACP_c + C40ACP_c + co2_c + h2o_c + 2.0 nadp_c	2.3.1.85	113.753	0		R471	0	acACP_c + 2.0 h_c + malACP_c + 2.0 nadph_c --> ACP_c + C40ACP_c + co2_c + h2o_c + 2.0 nadp_c	2.3.1.85	113.753	0		R471	0	acACP_c + 2.0 h_c + malACP_c + 2.0 nadph_c --> ACP_c + C40ACP_c + co2_c + h2o_c + 2.0 nadp_c	2.3.1.85	113.753	0		R471
R472_num1	0	C40ACP_c + h_c + malACP_c --> ACP_c + C6OACP_c + co2_c	2.3.1.41,2.3.1.85,2.3.1.86,2.3.1.179	392.736	0		R472_num1	0	C40ACP_c + h_c + malACP_c --> ACP_c + C6OACP_c + co2_c	2.3.1.41,2.3.1.85,2.3.1.86,2.3.1.179	392.736	0		R472_num1	0	C40ACP_c + h_c + malACP_c --> ACP_c + C6OACP_c + co2_c	2.3.1.41,2.3.1.85,2.3.1.86,2.3.1.179	392.736	0		R472_num1	0	C40ACP_c + h_c + malACP_c --> ACP_c + C6OACP_c + co2_c	2.3.1.41,2.3.1.85,2.3.1.86,2.3.1.179	392.736	0		R472_num1	0	C40ACP_c + h_c + malACP_c --> ACP_c + C6OACP_c + co2_c	2.3.1.41,2.3.1.85,2.3.1.86,2.3.1.179	392.736	0		R472_num1	0	C40ACP_c + h_c + malACP_c --> ACP_c + C6OACP_c + co2_c	2.3.1.41,2.3.1.85,2.3.1.86,2.3.1.179	392.736	0		R472_num1	0	C40ACP_c + h_c + malACP_c --> ACP_c + C6OACP_c + co2_c	2.3.1.41,2.3.1.85,2.3.1.86,2.3.1.179	392.736	0		R472_num1
R473_num1	0	C6OACP_c + h_c + nadph_c --> C6HACP_c + nadp_c	1.1.1.100,1.1.1.-,2.3.1.85,2.3.1.86	392.736	0		R473_num1	0	C6OACP_c + h_c + nadph_c --> C6HACP_c + nadp_c	1.1.1.100,1.1.1.-,2.3.1.85,2.3.1.86	392.736	0		R473_num1	0	C6OACP_c + h_c + nadph_c --> C6HACP_c + nadp_c	1.1.1.100,1.1.1.-,2.3.1.85,2.3.1.86	392.736	0		R473_num1	0	C6OACP_c + h_c + nadph_c --> C6HACP_c + nadp_c	1.1.1.100,1.1.1.-,2.3.1.85,2.3.1.86	392.736	0		R473_num1	0	C6OACP_c + h_c + nadph_c --> C6HACP_c + nadp_c	1.1.1.100,1.1.1.-,2.3.1.85,2.3.1.86	392.736	0		R473_num1	0	C6OACP_c + h_c + nadph_c --> C6HACP_c + nadp_c	1.1.1.100,1.1.1.-,2.3.1.85,2.3.1.86	392.736	0		R473_num1	0	C6OACP_c + h_c + nadph_c --> C6HACP_c + nadp_c	1.1.1.100,1.1.1.-,2.3.1.85,2.3.1.86	392.736	0		R473_num1
R474_num1	0	C6HACP_c --> C6DACP_c + h2o_c	2.3.1.85,2.3.1.86,2.3.1.-,4.2.1.59	2398.48	0		R474_num1	0	C6HACP_c --> C6DACP_c + h2o_c	2.3.1.85,2.3.1.86,2.3.1.-,4.2.1.59	2398.48	0		R474_num1	0	C6HACP_c --> C6DACP_c + h2o_c	2.3.1.85,2.3.1.86,2.3.1.-,4.2.1.59	2398.48	0		R474_num1	0	C6HACP_c --> C6DACP_c + h2o_c	2.3.1.85,2.3.1.86,2.3.1.-,4.2.1.59	2398.48	0		R474_num1	0	C6HACP_c --> C6DACP_c + h2o_c	2.3.1.85,2.3.1.86,2.3.1.-,4.2.1.59	2398.48	0		R474_num1	0	C6HACP_c --> C6DACP_c + h2o_c	2.3.1.85,2.3.1.86,2.3.1.-,4.2.1.59	2398.48	0		R474_num1	0	C6HACP_c --> C6DACP_c + h2o_c	2.3.1.85,2.3.1.86,2.3.1.-,4.2.1.59	2398.48	0		R474_num1
R475_num1	0	C6DACP_c + h_c + nadph_c --> C60ACP_c + nadp_c	1.3.1.10,1.3.1.39,1.3.1.104,1.3.1.-	2398.48	0		R475_num1	0	C6DACP_c + h_c + nadph_c --> C60ACP_c + nadp_c	1.3.1.10,1.3.1.39,1.3.1.104,1.3.1.-	2398.48	0		R475_num1	0	C6DACP_c + h_c + nadph_c --> C60ACP_c + nadp_c	1.3.1.10,1.3.1.39,1.3.1.104,1.3.1.-	2398.48	0		R475_num1	0	C6DACP_c + h_c + nadph_c --> C60ACP_c + nadp_c	1.3.1.10,1.3.1.39,1.3.1.104,1.3.1.-	2398.48	0		R475_num1	0	C6DACP_c + h_c + nadph_c --> C60ACP_c + nadp_c	1.3.1.10,1.3.1.39,1.3.1.104,1.3.1.-	2398.48	0		R475_num1	0	C6DACP_c + h_c + nadph_c --> C60ACP_c + nadp_c	1.3.1.10,1.3.1.39,1.3.1.104,1.3.1.-	2398.48	0		R475_num1	0	C6DACP_c + h_c + nadph_c --> C60ACP_c + nadp_c	1.3.1.10,1.3.1.39,1.3.1.104,1.3.1.-	2398.48	0		R475_num1
R476	0	C40ACP_c + 3.0 h_c + malACP_c + 2.0 nadph_c --> ACP_c + C60ACP_c + co2_c + h2o_c + 2.0 nadp_c	2.3.1.85	113.753	0		R476	0	C40ACP_c + 3.0 h_c + malACP_c + 2.0 nadph_c --> ACP_c + C60ACP_c + co2_c + h2o_c + 2.0 nadp_c	2.3.1.85	113.753	0		R476	0	C40ACP_c + 3.0 h_c + malACP_c + 2.0 nadph_c --> ACP_c + C60ACP_c + co2_c + h2o_c + 2.0 nadp_c	2.3.1.85	113.753	0		R476	0	C40ACP_c + 3.0 h_c + malACP_c + 2.0 nadph_c --> ACP_c + C60ACP_c + co2_c + h2o_c + 2.0 nadp_c	2.3.1.85	113.753	0		R476	0	C40ACP_c + 3.0 h_c + malACP_c + 2.0 nadph_c --> ACP_c + C60ACP_c + co2_c + h2o_c + 2.0 nadp_c	2.3.1.85	113.753	0		R476	0	C40ACP_c + 3.0 h_c + malACP_c + 2.0 nadph_c --> ACP_c + C60ACP_c + co2_c + h2o_c + 2.0 nadp_c	2.3.1.85	113.753	0		R476	0	C40ACP_c + 3.0 h_c + malACP_c + 2.0 nadph_c --> ACP_c + C60ACP_c + co2_c + h2o_c + 2.0 nadp_c	2.3.1.85	113.753	0		R476
R477_num1	0	C60ACP_c + h_c + malACP_c --> ACP_c + C8OACP_c + co2_c	2.3.1.41,2.3.1.85,2.3.1.86,2.3.1.179	392.736	0		R477_num1	0	C60ACP_c + h_c + malACP_c --> ACP_c + C8OACP_c + co2_c	2.3.1.41,2.3.1.85,2.3.1.86,2.3.1.179	392.736	0		R477_num1	0	C60ACP_c + h_c + malACP_c --> ACP_c + C8OACP_c + co2_c	2.3.1.41,2.3.1.85,2.3.1.86,2.3.1.179	392.736	0		R477_num1	0	C60ACP_c + h_c + malACP_c --> ACP_c + C8OACP_c + co2_c	2.3.1.41,2.3.1.85,2.3.1.86,2.3.1.179	392.736	0		R477_num1	0	C60ACP_c + h_c + malACP_c --> ACP_c + C8OACP_c + co2_c	2.3.1.41,2.3.1.85,2.3.1.86,2.3.1.179	392.736	0		R477_num1	0	C60ACP_c + h_c + malACP_c --> ACP_c + C8OACP_c + co2_c	2.3.1.41,2.3.1.85,2.3.1.86,2.3.1.179	392.736	0		R477_num1	0	C60ACP_c + h_c + malACP_c --> ACP_c + C8OACP_c + co2_c	2.3.1.41,2.3.1.85,2.3.1.86,2.3.1.179	392.736	0		R477_num1
R478_num1	0	C8OACP_c + h_c + nadph_c --> C8HACP_c + nadp_c	1.1.1.100,1.1.1.-,2.3.1.85,2.3.1.86	392.736	0		R478_num1	0	C8OACP_c + h_c + nadph_c --> C8HACP_c + nadp_c	1.1.1.100,1.1.1.-,2.3.1.85,2.3.1.86	392.736	0		R478_num1	0	C8OACP_c + h_c + nadph_c --> C8HACP_c + nadp_c	1.1.1.100,1.1.1.-,2.3.1.85,2.3.1.86	392.736	0		R478_num1	0	C8OACP_c + h_c + nadph_c --> C8HACP_c + nadp_c	1.1.1.100,1.1.1.-,2.3.1.85,2.3.1.86	392.736	0		R478_num1	0	C8OACP_c + h_c + nadph_c --> C8HACP_c + nadp_c	1.1.1.100,1.1.1.-,2.3.1.85,2.3.1.86	392.736	0		R478_num1	0	C8OACP_c + h_c + nadph_c --> C8HACP_c + nadp_c	1.1.1.100,1.1.1.-,2.3.1.85,2.3.1.86	392.736	0		R478_num1	0	C8OACP_c + h_c + nadph_c --> C8HACP_c + nadp_c	1.1.1.100,1.1.1.-,2.3.1.85,2.3.1.86	392.736	0		R478_num1
R479_num1	0	C8HACP_c --> C8DACP_c + h2o_c	2.3.1.85,2.3.1.86,2.3.1.-,4.2.1.59	2398.48	0		R479_num1	0	C8HACP_c --> C8DACP_c + h2o_c	2.3.1.85,2.3.1.86,2.3.1.-,4.2.1.59	2398.48	0		R479_num1	0	C8HACP_c --> C8DACP_c + h2o_c	2.3.1.85,2.3.1.86,2.3.1.-,4.2.1.59	2398.48	0		R479_num1	0	C8HACP_c --> C8DACP_c + h2o_c	2.3.1.85,2.3.1.86,2.3.1.-,4.2.1.59	2398.48	0		R479_num1	0	C8HACP_c --> C8DACP_c + h2o_c	2.3.1.85,2.3.1.86,2.3.1.-,4.2.1.59	2398.48	0		R479_num1	0	C8HACP_c --> C8DACP_c + h2o_c	2.3.1.85,2.3.1.86,2.3.1.-,4.2.1.59	2398.48	0		R479_num1	0	C8HACP_c --> C8DACP_c + h2o_c	2.3.1.85,2.3.1.86,2.3.1.-,4.2.1.59	2398.48	0		R479_num1
R480_num1	0	C8DACP_c + h_c + nadph_c --> C80ACP_c + nadp_c	1.3.1.10,1.3.1.39,1.3.1.104,1.3.1.-	2398.48	0		R480_num1	0	C8DACP_c + h_c + nadph_c --> C80ACP_c + nadp_c	1.3.1.10,1.3.1.39,1.3.1.104,1.3.1.-	2398.48	0		R480_num1	0	C8DACP_c + h_c + nadph_c --> C80ACP_c + nadp_c	1.3.1.10,1.3.1.39,1.3.1.104,1.3.1.-	2398.48	0		R480_num1	0	C8DACP_c + h_c + nadph_c --> C80ACP_c + nadp_c	1.3.1.10,1.3.1.39,1.3.1.104,1.3.1.-	2398.48	0		R480_num1	0	C8DACP_c + h_c + nadph_c --> C80ACP_c + nadp_c	1.3.1.10,1.3.1.39,1.3.1.104,1.3.1.-	2398.48	0		R480_num1	0	C8DACP_c + h_c + nadph_c --> C80ACP_c + nadp_c	1.3.1.10,1.3.1.39,1.3.1.104,1.3.1.-	2398.48	0		R480_num1	0	C8DACP_c + h_c + nadph_c --> C80ACP_c + nadp_c	1.3.1.10,1.3.1.39,1.3.1.104,1.3.1.-	2398.48	0		R480_num1
R481	0	C60ACP_c + 3.0 h_c + malACP_c + 2.0 nadph_c --> ACP_c + C80ACP_c + co2_c + h2o_c + 2.0 nadp_c	2.3.1.85	113.753	0		R481	0	C60ACP_c + 3.0 h_c + malACP_c + 2.0 nadph_c --> ACP_c + C80ACP_c + co2_c + h2o_c + 2.0 nadp_c	2.3.1.85	113.753	0		R481	0	C60ACP_c + 3.0 h_c + malACP_c + 2.0 nadph_c --> ACP_c + C80ACP_c + co2_c + h2o_c + 2.0 nadp_c	2.3.1.85	113.753	0		R481	0	C60ACP_c + 3.0 h_c + malACP_c + 2.0 nadph_c --> ACP_c + C80ACP_c + co2_c + h2o_c + 2.0 nadp_c	2.3.1.85	113.753	0		R481	0	C60ACP_c + 3.0 h_c + malACP_c + 2.0 nadph_c --> ACP_c + C80ACP_c + co2_c + h2o_c + 2.0 nadp_c	2.3.1.85	113.753	0		R481	0	C60ACP_c + 3.0 h_c + malACP_c + 2.0 nadph_c --> ACP_c + C80ACP_c + co2_c + h2o_c + 2.0 nadp_c	2.3.1.85	113.753	0		R481	0	C60ACP_c + 3.0 h_c + malACP_c + 2.0 nadph_c --> ACP_c + C80ACP_c + co2_c + h2o_c + 2.0 nadp_c	2.3.1.85	113.753	0		R481
R482_num1	0	C80ACP_c + h_c + malACP_c --> ACP_c + C10OACP_c + co2_c	2.3.1.41,2.3.1.85,2.3.1.86,2.3.1.179	392.736	0		R482_num1	0	C80ACP_c + h_c + malACP_c --> ACP_c + C10OACP_c + co2_c	2.3.1.41,2.3.1.85,2.3.1.86,2.3.1.179	392.736	0		R482_num1	0	C80ACP_c + h_c + malACP_c --> ACP_c + C10OACP_c + co2_c	2.3.1.41,2.3.1.85,2.3.1.86,2.3.1.179	392.736	0		R482_num1	0	C80ACP_c + h_c + malACP_c --> ACP_c + C10OACP_c + co2_c	2.3.1.41,2.3.1.85,2.3.1.86,2.3.1.179	392.736	0		R482_num1	0	C80ACP_c + h_c + malACP_c --> ACP_c + C10OACP_c + co2_c	2.3.1.41,2.3.1.85,2.3.1.86,2.3.1.179	392.736	0		R482_num1	0	C80ACP_c + h_c + malACP_c --> ACP_c + C10OACP_c + co2_c	2.3.1.41,2.3.1.85,2.3.1.86,2.3.1.179	392.736	0		R482_num1	0	C80ACP_c + h_c + malACP_c --> ACP_c + C10OACP_c + co2_c	2.3.1.41,2.3.1.85,2.3.1.86,2.3.1.179	392.736	0		R482_num1
R483_num1	0	C10OACP_c + h_c + nadph_c --> C10HACP_c + nadp_c	1.1.1.100,1.1.1.-,2.3.1.85,2.3.1.86	392.736	0		R483_num1	0	C10OACP_c + h_c + nadph_c --> C10HACP_c + nadp_c	1.1.1.100,1.1.1.-,2.3.1.85,2.3.1.86	392.736	0		R483_num1	0	C10OACP_c + h_c + nadph_c --> C10HACP_c + nadp_c	1.1.1.100,1.1.1.-,2.3.1.85,2.3.1.86	392.736	0		R483_num1	0	C10OACP_c + h_c + nadph_c --> C10HACP_c + nadp_c	1.1.1.100,1.1.1.-,2.3.1.85,2.3.1.86	392.736	0		R483_num1	0	C10OACP_c + h_c + nadph_c --> C10HACP_c + nadp_c	1.1.1.100,1.1.1.-,2.3.1.85,2.3.1.86	392.736	0		R483_num1	0	C10OACP_c + h_c + nadph_c --> C10HACP_c + nadp_c	1.1.1.100,1.1.1.-,2.3.1.85,2.3.1.86	392.736	0		R483_num1	0	C10OACP_c + h_c + nadph_c --> C10HACP_c + nadp_c	1.1.1.100,1.1.1.-,2.3.1.85,2.3.1.86	392.736	0		R483_num1
R484_num1	0	C10HACP_c --> C10DACP_c + h2o_c	2.3.1.85,2.3.1.86,2.3.1.-,4.2.1.59	2398.48	0		R484_num1	0	C10HACP_c --> C10DACP_c + h2o_c	2.3.1.85,2.3.1.86,2.3.1.-,4.2.1.59	2398.48	0		R484_num1	0	C10HACP_c --> C10DACP_c + h2o_c	2.3.1.85,2.3.1.86,2.3.1.-,4.2.1.59	2398.48	0		R484_num1	0	C10HACP_c --> C10DACP_c + h2o_c	2.3.1.85,2.3.1.86,2.3.1.-,4.2.1.59	2398.48	0		R484_num1	0	C10HACP_c --> C10DACP_c + h2o_c	2.3.1.85,2.3.1.86,2.3.1.-,4.2.1.59	2398.48	0		R484_num1	0	C10HACP_c --> C10DACP_c + h2o_c	2.3.1.85,2.3.1.86,2.3.1.-,4.2.1.59	2398.48	0		R484_num1	0	C10HACP_c --> C10DACP_c + h2o_c	2.3.1.85,2.3.1.86,2.3.1.-,4.2.1.59	2398.48	0		R484_num1
R485_num1	0	C10DACP_c + h_c + nadph_c --> C100ACP_c + nadp_c	1.3.1.10,1.3.1.39,1.3.1.104,1.3.1.-	2398.48	0		R485_num1	0	C10DACP_c + h_c + nadph_c --> C100ACP_c + nadp_c	1.3.1.10,1.3.1.39,1.3.1.104,1.3.1.-	2398.48	0		R485_num1	0	C10DACP_c + h_c + nadph_c --> C100ACP_c + nadp_c	1.3.1.10,1.3.1.39,1.3.1.104,1.3.1.-	2398.48	0		R485_num1	0	C10DACP_c + h_c + nadph_c --> C100ACP_c + nadp_c	1.3.1.10,1.3.1.39,1.3.1.104,1.3.1.-	2398.48	0		R485_num1	0	C10DACP_c + h_c + nadph_c --> C100ACP_c + nadp_c	1.3.1.10,1.3.1.39,1.3.1.104,1.3.1.-	2398.48	0		R485_num1	0	C10DACP_c + h_c + nadph_c --> C100ACP_c + nadp_c	1.3.1.10,1.3.1.39,1.3.1.104,1.3.1.-	2398.48	0		R485_num1	0	C10DACP_c + h_c + nadph_c --> C100ACP_c + nadp_c	1.3.1.10,1.3.1.39,1.3.1.104,1.3.1.-	2398.48	0		R485_num1
R486	0	C80ACP_c + 3.0 h_c + malACP_c + 2.0 nadph_c --> ACP_c + C100ACP_c + co2_c + h2o_c + 2.0 nadp_c	2.3.1.85	113.753	0		R486	0	C80ACP_c + 3.0 h_c + malACP_c + 2.0 nadph_c --> ACP_c + C100ACP_c + co2_c + h2o_c + 2.0 nadp_c	2.3.1.85	113.753	0		R486	0	C80ACP_c + 3.0 h_c + malACP_c + 2.0 nadph_c --> ACP_c + C100ACP_c + co2_c + h2o_c + 2.0 nadp_c	2.3.1.85	113.753	0		R486	0	C80ACP_c + 3.0 h_c + malACP_c + 2.0 nadph_c --> ACP_c + C100ACP_c + co2_c + h2o_c + 2.0 nadp_c	2.3.1.85	113.753	0		R486	0	C80ACP_c + 3.0 h_c + malACP_c + 2.0 nadph_c --> ACP_c + C100ACP_c + co2_c + h2o_c + 2.0 nadp_c	2.3.1.85	113.753	0		R486	0	C80ACP_c + 3.0 h_c + malACP_c + 2.0 nadph_c --> ACP_c + C100ACP_c + co2_c + h2o_c + 2.0 nadp_c	2.3.1.85	113.753	0		R486	0	C80ACP_c + 3.0 h_c + malACP_c + 2.0 nadph_c --> ACP_c + C100ACP_c + co2_c + h2o_c + 2.0 nadp_c	2.3.1.85	113.753	0		R486
R487_num1	0	C100ACP_c + h_c + malACP_c --> ACP_c + C12OACP_c + co2_c	2.3.1.41,2.3.1.85,2.3.1.86,2.3.1.179	392.736	0		R487_num1	0	C100ACP_c + h_c + malACP_c --> ACP_c + C12OACP_c + co2_c	2.3.1.41,2.3.1.85,2.3.1.86,2.3.1.179	392.736	0		R487_num1	0	C100ACP_c + h_c + malACP_c --> ACP_c + C12OACP_c + co2_c	2.3.1.41,2.3.1.85,2.3.1.86,2.3.1.179	392.736	0		R487_num1	0	C100ACP_c + h_c + malACP_c --> ACP_c + C12OACP_c + co2_c	2.3.1.41,2.3.1.85,2.3.1.86,2.3.1.179	392.736	0		R487_num1	0	C100ACP_c + h_c + malACP_c --> ACP_c + C12OACP_c + co2_c	2.3.1.41,2.3.1.85,2.3.1.86,2.3.1.179	392.736	0		R487_num1	0	C100ACP_c + h_c + malACP_c --> ACP_c + C12OACP_c + co2_c	2.3.1.41,2.3.1.85,2.3.1.86,2.3.1.179	392.736	0		R487_num1	0	C100ACP_c + h_c + malACP_c --> ACP_c + C12OACP_c + co2_c	2.3.1.41,2.3.1.85,2.3.1.86,2.3.1.179	392.736	0		R487_num1
R488_num1	0	C12OACP_c + h_c + nadph_c --> C12HACP_c + nadp_c	1.1.1.100,1.1.1.-,2.3.1.85,2.3.1.86	392.736	0		R488_num1	0	C12OACP_c + h_c + nadph_c --> C12HACP_c + nadp_c	1.1.1.100,1.1.1.-,2.3.1.85,2.3.1.86	392.736	0		R488_num1	0	C12OACP_c + h_c + nadph_c --> C12HACP_c + nadp_c	1.1.1.100,1.1.1.-,2.3.1.85,2.3.1.86	392.736	0		R488_num1	0	C12OACP_c + h_c + nadph_c --> C12HACP_c + nadp_c	1.1.1.100,1.1.1.-,2.3.1.85,2.3.1.86	392.736	0		R488_num1	0	C12OACP_c + h_c + nadph_c --> C12HACP_c + nadp_c	1.1.1.100,1.1.1.-,2.3.1.85,2.3.1.86	392.736	0		R488_num1	0	C12OACP_c + h_c + nadph_c --> C12HACP_c + nadp_c	1.1.1.100,1.1.1.-,2.3.1.85,2.3.1.86	392.736	0		R488_num1	0	C12OACP_c + h_c + nadph_c --> C12HACP_c + nadp_c	1.1.1.100,1.1.1.-,2.3.1.85,2.3.1.86	392.736	0		R488_num1
R489_num1	0	C12HACP_c --> C12DACP_c + h2o_c	2.3.1.85,2.3.1.86,2.3.1.-,4.2.1.59	2398.48	0		R489_num1	0	C12HACP_c --> C12DACP_c + h2o_c	2.3.1.85,2.3.1.86,2.3.1.-,4.2.1.59	2398.48	0		R489_num1	0	C12HACP_c --> C12DACP_c + h2o_c	2.3.1.85,2.3.1.86,2.3.1.-,4.2.1.59	2398.48	0		R489_num1	0	C12HACP_c --> C12DACP_c + h2o_c	2.3.1.85,2.3.1.86,2.3.1.-,4.2.1.59	2398.48	0		R489_num1	0	C12HACP_c --> C12DACP_c + h2o_c	2.3.1.85,2.3.1.86,2.3.1.-,4.2.1.59	2398.48	0		R489_num1	0	C12HACP_c --> C12DACP_c + h2o_c	2.3.1.85,2.3.1.86,2.3.1.-,4.2.1.59	2398.48	0		R489_num1	0	C12HACP_c --> C12DACP_c + h2o_c	2.3.1.85,2.3.1.86,2.3.1.-,4.2.1.59	2398.48	0		R489_num1
R490_num1	0	C12DACP_c + h_c + nadph_c --> dodecacp_c + nadp_c	1.3.1.10,1.3.1.39,1.3.1.104,1.3.1.-	2398.48	0		R490_num1	0	C12DACP_c + h_c + nadph_c --> dodecacp_c + nadp_c	1.3.1.10,1.3.1.39,1.3.1.104,1.3.1.-	2398.48	0		R490_num1	0	C12DACP_c + h_c + nadph_c --> dodecacp_c + nadp_c	1.3.1.10,1.3.1.39,1.3.1.104,1.3.1.-	2398.48	0		R490_num1	0	C12DACP_c + h_c + nadph_c --> dodecacp_c + nadp_c	1.3.1.10,1.3.1.39,1.3.1.104,1.3.1.-	2398.48	0		R490_num1	0	C12DACP_c + h_c + nadph_c --> dodecacp_c + nadp_c	1.3.1.10,1.3.1.39,1.3.1.104,1.3.1.-	2398.48	0		R490_num1	0	C12DACP_c + h_c + nadph_c --> dodecacp_c + nadp_c	1.3.1.10,1.3.1.39,1.3.1.104,1.3.1.-	2398.48	0		R490_num1	0	C12DACP_c + h_c + nadph_c --> dodecacp_c + nadp_c	1.3.1.10,1.3.1.39,1.3.1.104,1.3.1.-	2398.48	0		R490_num1
R491	0	C100ACP_c + 3.0 h_c + malACP_c + 2.0 nadph_c --> ACP_c + co2_c + dodecacp_c + h2o_c + 2.0 nadp_c	2.3.1.85	113.753	0		R491	0	C100ACP_c + 3.0 h_c + malACP_c + 2.0 nadph_c --> ACP_c + co2_c + dodecacp_c + h2o_c + 2.0 nadp_c	2.3.1.85	113.753	0		R491	0	C100ACP_c + 3.0 h_c + malACP_c + 2.0 nadph_c --> ACP_c + co2_c + dodecacp_c + h2o_c + 2.0 nadp_c	2.3.1.85	113.753	0		R491	0	C100ACP_c + 3.0 h_c + malACP_c + 2.0 nadph_c --> ACP_c + co2_c + dodecacp_c + h2o_c + 2.0 nadp_c	2.3.1.85	113.753	0		R491	0	C100ACP_c + 3.0 h_c + malACP_c + 2.0 nadph_c --> ACP_c + co2_c + dodecacp_c + h2o_c + 2.0 nadp_c	2.3.1.85	113.753	0		R491	0	C100ACP_c + 3.0 h_c + malACP_c + 2.0 nadph_c --> ACP_c + co2_c + dodecacp_c + h2o_c + 2.0 nadp_c	2.3.1.85	113.753	0		R491	0	C100ACP_c + 3.0 h_c + malACP_c + 2.0 nadph_c --> ACP_c + co2_c + dodecacp_c + h2o_c + 2.0 nadp_c	2.3.1.85	113.753	0		R491
R492_num1	0	dodecacp_c + h_c + malACP_c --> ACP_c + C14OACP_c + co2_c	2.3.1.41,2.3.1.85,2.3.1.86,2.3.1.179	392.736	0		R492_num1	0	dodecacp_c + h_c + malACP_c --> ACP_c + C14OACP_c + co2_c	2.3.1.41,2.3.1.85,2.3.1.86,2.3.1.179	392.736	0		R492_num1	0	dodecacp_c + h_c + malACP_c --> ACP_c + C14OACP_c + co2_c	2.3.1.41,2.3.1.85,2.3.1.86,2.3.1.179	392.736	0		R492_num1	0	dodecacp_c + h_c + malACP_c --> ACP_c + C14OACP_c + co2_c	2.3.1.41,2.3.1.85,2.3.1.86,2.3.1.179	392.736	0		R492_num1	0	dodecacp_c + h_c + malACP_c --> ACP_c + C14OACP_c + co2_c	2.3.1.41,2.3.1.85,2.3.1.86,2.3.1.179	392.736	0		R492_num1	0	dodecacp_c + h_c + malACP_c --> ACP_c + C14OACP_c + co2_c	2.3.1.41,2.3.1.85,2.3.1.86,2.3.1.179	392.736	0		R492_num1	0	dodecacp_c + h_c + malACP_c --> ACP_c + C14OACP_c + co2_c	2.3.1.41,2.3.1.85,2.3.1.86,2.3.1.179	392.736	0		R492_num1
R493_num1	0	C14OACP_c + h_c + nadph_c --> C14HACP_c + nadp_c	1.1.1.100,1.1.1.-,2.3.1.85,2.3.1.86	392.736	0		R493_num1	0	C14OACP_c + h_c + nadph_c --> C14HACP_c + nadp_c	1.1.1.100,1.1.1.-,2.3.1.85,2.3.1.86	392.736	0		R493_num1	0	C14OACP_c + h_c + nadph_c --> C14HACP_c + nadp_c	1.1.1.100,1.1.1.-,2.3.1.85,2.3.1.86	392.736	0		R493_num1	0	C14OACP_c + h_c + nadph_c --> C14HACP_c + nadp_c	1.1.1.100,1.1.1.-,2.3.1.85,2.3.1.86	392.736	0		R493_num1	0	C14OACP_c + h_c + nadph_c --> C14HACP_c + nadp_c	1.1.1.100,1.1.1.-,2.3.1.85,2.3.1.86	392.736	0		R493_num1	0	C14OACP_c + h_c + nadph_c --> C14HACP_c + nadp_c	1.1.1.100,1.1.1.-,2.3.1.85,2.3.1.86	392.736	0		R493_num1	0	C14OACP_c + h_c + nadph_c --> C14HACP_c + nadp_c	1.1.1.100,1.1.1.-,2.3.1.85,2.3.1.86	392.736	0		R493_num1
R494_num1	0	C14HACP_c --> C14DACP_c + h2o_c	2.3.1.85,2.3.1.86,2.3.1.-,4.2.1.59	2398.48	0		R494_num1	0	C14HACP_c --> C14DACP_c + h2o_c	2.3.1.85,2.3.1.86,2.3.1.-,4.2.1.59	2398.48	0		R494_num1	0	C14HACP_c --> C14DACP_c + h2o_c	2.3.1.85,2.3.1.86,2.3.1.-,4.2.1.59	2398.48	0		R494_num1	0	C14HACP_c --> C14DACP_c + h2o_c	2.3.1.85,2.3.1.86,2.3.1.-,4.2.1.59	2398.48	0		R494_num1	0	C14HACP_c --> C14DACP_c + h2o_c	2.3.1.85,2.3.1.86,2.3.1.-,4.2.1.59	2398.48	0		R494_num1	0	C14HACP_c --> C14DACP_c + h2o_c	2.3.1.85,2.3.1.86,2.3.1.-,4.2.1.59	2398.48	0		R494_num1	0	C14HACP_c --> C14DACP_c + h2o_c	2.3.1.85,2.3.1.86,2.3.1.-,4.2.1.59	2398.48	0		R494_num1
R495_num1	0	C14DACP_c + h_c + nadph_c --> C140ACP_c + nadp_c	1.3.1.10,1.3.1.39,1.3.1.104,1.3.1.-	2398.48	0		R495_num1	0	C14DACP_c + h_c + nadph_c --> C140ACP_c + nadp_c	1.3.1.10,1.3.1.39,1.3.1.104,1.3.1.-	2398.48	0		R495_num1	0	C14DACP_c + h_c + nadph_c --> C140ACP_c + nadp_c	1.3.1.10,1.3.1.39,1.3.1.104,1.3.1.-	2398.48	0		R495_num1	0	C14DACP_c + h_c + nadph_c --> C140ACP_c + nadp_c	1.3.1.10,1.3.1.39,1.3.1.104,1.3.1.-	2398.48	0		R495_num1	0	C14DACP_c + h_c + nadph_c --> C140ACP_c + nadp_c	1.3.1.10,1.3.1.39,1.3.1.104,1.3.1.-	2398.48	0		R495_num1	0	C14DACP_c + h_c + nadph_c --> C140ACP_c + nadp_c	1.3.1.10,1.3.1.39,1.3.1.104,1.3.1.-	2398.48	0		R495_num1	0	C14DACP_c + h_c + nadph_c --> C140ACP_c + nadp_c	1.3.1.10,1.3.1.39,1.3.1.104,1.3.1.-	2398.48	0		R495_num1
R496	0	dodecacp_c + 3.0 h_c + malACP_c + 2.0 nadph_c --> ACP_c + C140ACP_c + co2_c + h2o_c + 2.0 nadp_c	2.3.1.85	113.753	0		R496	0	dodecacp_c + 3.0 h_c + malACP_c + 2.0 nadph_c --> ACP_c + C140ACP_c + co2_c + h2o_c + 2.0 nadp_c	2.3.1.85	113.753	0		R496	0	dodecacp_c + 3.0 h_c + malACP_c + 2.0 nadph_c --> ACP_c + C140ACP_c + co2_c + h2o_c + 2.0 nadp_c	2.3.1.85	113.753	0		R496	0	dodecacp_c + 3.0 h_c + malACP_c + 2.0 nadph_c --> ACP_c + C140ACP_c + co2_c + h2o_c + 2.0 nadp_c	2.3.1.85	113.753	0		R496	0	dodecacp_c + 3.0 h_c + malACP_c + 2.0 nadph_c --> ACP_c + C140ACP_c + co2_c + h2o_c + 2.0 nadp_c	2.3.1.85	113.753	0		R496	0	dodecacp_c + 3.0 h_c + malACP_c + 2.0 nadph_c --> ACP_c + C140ACP_c + co2_c + h2o_c + 2.0 nadp_c	2.3.1.85	113.753	0		R496	0	dodecacp_c + 3.0 h_c + malACP_c + 2.0 nadph_c --> ACP_c + C140ACP_c + co2_c + h2o_c + 2.0 nadp_c	2.3.1.85	113.753	0		R496
R497_num1	0	C140ACP_c + h_c + malACP_c --> 3opalmACP_c + ACP_c + co2_c	2.3.1.41,2.3.1.85,2.3.1.86,2.3.1.179	392.736	0		R497_num1	0	C140ACP_c + h_c + malACP_c --> 3opalmACP_c + ACP_c + co2_c	2.3.1.41,2.3.1.85,2.3.1.86,2.3.1.179	392.736	0		R497_num1	0	C140ACP_c + h_c + malACP_c --> 3opalmACP_c + ACP_c + co2_c	2.3.1.41,2.3.1.85,2.3.1.86,2.3.1.179	392.736	0		R497_num1	0	C140ACP_c + h_c + malACP_c --> 3opalmACP_c + ACP_c + co2_c	2.3.1.41,2.3.1.85,2.3.1.86,2.3.1.179	392.736	0		R497_num1	0	C140ACP_c + h_c + malACP_c --> 3opalmACP_c + ACP_c + co2_c	2.3.1.41,2.3.1.85,2.3.1.86,2.3.1.179	392.736	0		R497_num1	0	C140ACP_c + h_c + malACP_c --> 3opalmACP_c + ACP_c + co2_c	2.3.1.41,2.3.1.85,2.3.1.86,2.3.1.179	392.736	0		R497_num1	0	C140ACP_c + h_c + malACP_c --> 3opalmACP_c + ACP_c + co2_c	2.3.1.41,2.3.1.85,2.3.1.86,2.3.1.179	392.736	0		R497_num1
R498_num1	0	3opalmACP_c + h_c + nadph_c --> C16HACP_c + nadp_c	1.1.1.100,1.1.1.-,2.3.1.85,2.3.1.86	392.736	0		R498_num1	0	3opalmACP_c + h_c + nadph_c --> C16HACP_c + nadp_c	1.1.1.100,1.1.1.-,2.3.1.85,2.3.1.86	392.736	0		R498_num1	0	3opalmACP_c + h_c + nadph_c --> C16HACP_c + nadp_c	1.1.1.100,1.1.1.-,2.3.1.85,2.3.1.86	392.736	0		R498_num1	0	3opalmACP_c + h_c + nadph_c --> C16HACP_c + nadp_c	1.1.1.100,1.1.1.-,2.3.1.85,2.3.1.86	392.736	0		R498_num1	0	3opalmACP_c + h_c + nadph_c --> C16HACP_c + nadp_c	1.1.1.100,1.1.1.-,2.3.1.85,2.3.1.86	392.736	0		R498_num1	0	3opalmACP_c + h_c + nadph_c --> C16HACP_c + nadp_c	1.1.1.100,1.1.1.-,2.3.1.85,2.3.1.86	392.736	0		R498_num1	0	3opalmACP_c + h_c + nadph_c --> C16HACP_c + nadp_c	1.1.1.100,1.1.1.-,2.3.1.85,2.3.1.86	392.736	0		R498_num1
R499_num1	0	C16HACP_c --> C16DACP_c + h2o_c	2.3.1.85,2.3.1.86,2.3.1.-,4.2.1.59	2398.48	0		R499_num1	0	C16HACP_c --> C16DACP_c + h2o_c	2.3.1.85,2.3.1.86,2.3.1.-,4.2.1.59	2398.48	0		R499_num1	0	C16HACP_c --> C16DACP_c + h2o_c	2.3.1.85,2.3.1.86,2.3.1.-,4.2.1.59	2398.48	0		R499_num1	0	C16HACP_c --> C16DACP_c + h2o_c	2.3.1.85,2.3.1.86,2.3.1.-,4.2.1.59	2398.48	0		R499_num1	0	C16HACP_c --> C16DACP_c + h2o_c	2.3.1.85,2.3.1.86,2.3.1.-,4.2.1.59	2398.48	0		R499_num1	0	C16HACP_c --> C16DACP_c + h2o_c	2.3.1.85,2.3.1.86,2.3.1.-,4.2.1.59	2398.48	0		R499_num1	0	C16HACP_c --> C16DACP_c + h2o_c	2.3.1.85,2.3.1.86,2.3.1.-,4.2.1.59	2398.48	0		R499_num1
R500_num1	0	C16DACP_c + h_c + nadph_c --> C160ACP_c + nadp_c	1.3.1.10,1.3.1.39,1.3.1.104,1.3.1.-	2398.48	0		R500_num1	0	C16DACP_c + h_c + nadph_c --> C160ACP_c + nadp_c	1.3.1.10,1.3.1.39,1.3.1.104,1.3.1.-	2398.48	0		R500_num1	0	C16DACP_c + h_c + nadph_c --> C160ACP_c + nadp_c	1.3.1.10,1.3.1.39,1.3.1.104,1.3.1.-	2398.48	0		R500_num1	0	C16DACP_c + h_c + nadph_c --> C160ACP_c + nadp_c	1.3.1.10,1.3.1.39,1.3.1.104,1.3.1.-	2398.48	0		R500_num1	0	C16DACP_c + h_c + nadph_c --> C160ACP_c + nadp_c	1.3.1.10,1.3.1.39,1.3.1.104,1.3.1.-	2398.48	0		R500_num1	0	C16DACP_c + h_c + nadph_c --> C160ACP_c + nadp_c	1.3.1.10,1.3.1.39,1.3.1.104,1.3.1.-	2398.48	0		R500_num1	0	C16DACP_c + h_c + nadph_c --> C160ACP_c + nadp_c	1.3.1.10,1.3.1.39,1.3.1.104,1.3.1.-	2398.48	0		R500_num1
R501	0	C140ACP_c + 3.0 h_c + malACP_c + 2.0 nadph_c --> ACP_c + C160ACP_c + co2_c + h2o_c + 2.0 nadp_c	2.3.1.85	113.753	0		R501	0	C140ACP_c + 3.0 h_c + malACP_c + 2.0 nadph_c --> ACP_c + C160ACP_c + co2_c + h2o_c + 2.0 nadp_c	2.3.1.85	113.753	0		R501	0	C140ACP_c + 3.0 h_c + malACP_c + 2.0 nadph_c --> ACP_c + C160ACP_c + co2_c + h2o_c + 2.0 nadp_c	2.3.1.85	113.753	0		R501	0	C140ACP_c + 3.0 h_c + malACP_c + 2.0 nadph_c --> ACP_c + C160ACP_c + co2_c + h2o_c + 2.0 nadp_c	2.3.1.85	113.753	0		R501	0	C140ACP_c + 3.0 h_c + malACP_c + 2.0 nadph_c --> ACP_c + C160ACP_c + co2_c + h2o_c + 2.0 nadp_c	2.3.1.85	113.753	0		R501	0	C140ACP_c + 3.0 h_c + malACP_c + 2.0 nadph_c --> ACP_c + C160ACP_c + co2_c + h2o_c + 2.0 nadp_c	2.3.1.85	113.753	0		R501	0	C140ACP_c + 3.0 h_c + malACP_c + 2.0 nadph_c --> ACP_c + C160ACP_c + co2_c + h2o_c + 2.0 nadp_c	2.3.1.85	113.753	0		R501
R502_num1	0	C160ACP_c + h_c + malACP_c --> ACP_c + C18OACP_c + co2_c	2.3.1.41,2.3.1.179,2.3.1.199,2.3.1.-	392.736	0		R502_num1	0	C160ACP_c + h_c + malACP_c --> ACP_c + C18OACP_c + co2_c	2.3.1.41,2.3.1.179,2.3.1.199,2.3.1.-	392.736	0		R502_num1	0	C160ACP_c + h_c + malACP_c --> ACP_c + C18OACP_c + co2_c	2.3.1.41,2.3.1.179,2.3.1.199,2.3.1.-	392.736	0		R502_num1	0	C160ACP_c + h_c + malACP_c --> ACP_c + C18OACP_c + co2_c	2.3.1.41,2.3.1.179,2.3.1.199,2.3.1.-	392.736	0		R502_num1	0	C160ACP_c + h_c + malACP_c --> ACP_c + C18OACP_c + co2_c	2.3.1.41,2.3.1.179,2.3.1.199,2.3.1.-	392.736	0		R502_num1	0	C160ACP_c + h_c + malACP_c --> ACP_c + C18OACP_c + co2_c	2.3.1.41,2.3.1.179,2.3.1.199,2.3.1.-	392.736	0		R502_num1	0	C160ACP_c + h_c + malACP_c --> ACP_c + C18OACP_c + co2_c	2.3.1.41,2.3.1.179,2.3.1.199,2.3.1.-	392.736	0		R502_num1
R503_num1	0	C18OACP_c + h_c + nadph_c --> C18HACP_c + nadp_c	1.1.1.100,2.3.1.-	392.736	0		R503_num1	0	C18OACP_c + h_c + nadph_c --> C18HACP_c + nadp_c	1.1.1.100,2.3.1.-	392.736	0		R503_num1	0	C18OACP_c + h_c + nadph_c --> C18HACP_c + nadp_c	1.1.1.100,2.3.1.-	392.736	0		R503_num1	0	C18OACP_c + h_c + nadph_c --> C18HACP_c + nadp_c	1.1.1.100,2.3.1.-	392.736	0		R503_num1	0	C18OACP_c + h_c + nadph_c --> C18HACP_c + nadp_c	1.1.1.100,2.3.1.-	392.736	0		R503_num1	0	C18OACP_c + h_c + nadph_c --> C18HACP_c + nadp_c	1.1.1.100,2.3.1.-	392.736	0		R503_num1	0	C18OACP_c + h_c + nadph_c --> C18HACP_c + nadp_c	1.1.1.100,2.3.1.-	392.736	0		R503_num1
R504_num1	-2.50449e-15	C18HACP_c --> C18DACP_c + h2o_c	4.2.1.59,4.2.1.-	240.666	-1.04065e-17		R504_num1	0	C18HACP_c --> C18DACP_c + h2o_c	4.2.1.59,4.2.1.-	240.666	0		R504_num1	-2.99298e-18	C18HACP_c --> C18DACP_c + h2o_c	4.2.1.59,4.2.1.-	240.666	-1.24362e-20		R504_num1	2.12554e-15	C18HACP_c --> C18DACP_c + h2o_c	4.2.1.59,4.2.1.-	240.666	8.83189e-18		R504_num1	-5.16747e-17	C18HACP_c --> C18DACP_c + h2o_c	4.2.1.59,4.2.1.-	240.666	-2.14716e-19		R504_num1	-2.06097e-16	C18HACP_c --> C18DACP_c + h2o_c	4.2.1.59,4.2.1.-	240.666	-8.5636e-19		R504_num1	0	C18HACP_c --> C18DACP_c + h2o_c	4.2.1.59,4.2.1.-	240.666	0		R504_num1
R505_num1	-2.50449e-15	C18DACP_c + h_c + nadph_c --> C180ACP_c + nadp_c	1.3.1.9	3496.79	-7.16226e-19		R505_num1	0	C18DACP_c + h_c + nadph_c --> C180ACP_c + nadp_c	1.3.1.9	3496.79	0		R505_num1	-2.99298e-18	C18DACP_c + h_c + nadph_c --> C180ACP_c + nadp_c	1.3.1.9	3496.79	-8.55922e-22		R505_num1	2.12554e-15	C18DACP_c + h_c + nadph_c --> C180ACP_c + nadp_c	1.3.1.9	3496.79	6.07854e-19		R505_num1	-5.16747e-17	C18DACP_c + h_c + nadph_c --> C180ACP_c + nadp_c	1.3.1.9	3496.79	-1.47778e-20		R505_num1	-2.06097e-16	C18DACP_c + h_c + nadph_c --> C180ACP_c + nadp_c	1.3.1.9	3496.79	-5.89388e-20		R505_num1	0	C18DACP_c + h_c + nadph_c --> C180ACP_c + nadp_c	1.3.1.9	3496.79	0		R505_num1
R506	0	C160ACP_c + 3.0 h_c + malACP_c + 2.0 nadph_c --> ACP_c + C180ACP_c + co2_c + h2o_c + 2.0 nadp_c	2.3.1.85	113.753	0		R506	0	C160ACP_c + 3.0 h_c + malACP_c + 2.0 nadph_c --> ACP_c + C180ACP_c + co2_c + h2o_c + 2.0 nadp_c	2.3.1.85	113.753	0		R506	0	C160ACP_c + 3.0 h_c + malACP_c + 2.0 nadph_c --> ACP_c + C180ACP_c + co2_c + h2o_c + 2.0 nadp_c	2.3.1.85	113.753	0		R506	0	C160ACP_c + 3.0 h_c + malACP_c + 2.0 nadph_c --> ACP_c + C180ACP_c + co2_c + h2o_c + 2.0 nadp_c	2.3.1.85	113.753	0		R506	0	C160ACP_c + 3.0 h_c + malACP_c + 2.0 nadph_c --> ACP_c + C180ACP_c + co2_c + h2o_c + 2.0 nadp_c	2.3.1.85	113.753	0		R506	0	C160ACP_c + 3.0 h_c + malACP_c + 2.0 nadph_c --> ACP_c + C180ACP_c + co2_c + h2o_c + 2.0 nadp_c	2.3.1.85	113.753	0		R506	0	C160ACP_c + 3.0 h_c + malACP_c + 2.0 nadph_c --> ACP_c + C180ACP_c + co2_c + h2o_c + 2.0 nadp_c	2.3.1.85	113.753	0		R506
R507_num1	0	C180ACP_c + h_c + malACP_c --> ACP_c + C20OACP_c + co2_c	2.3.1.41,2.3.1.85,2.3.1.86,2.3.1.179	392.736	0		R507_num1	0	C180ACP_c + h_c + malACP_c --> ACP_c + C20OACP_c + co2_c	2.3.1.41,2.3.1.85,2.3.1.86,2.3.1.179	392.736	0		R507_num1	0	C180ACP_c + h_c + malACP_c --> ACP_c + C20OACP_c + co2_c	2.3.1.41,2.3.1.85,2.3.1.86,2.3.1.179	392.736	0		R507_num1	0	C180ACP_c + h_c + malACP_c --> ACP_c + C20OACP_c + co2_c	2.3.1.41,2.3.1.85,2.3.1.86,2.3.1.179	392.736	0		R507_num1	0	C180ACP_c + h_c + malACP_c --> ACP_c + C20OACP_c + co2_c	2.3.1.41,2.3.1.85,2.3.1.86,2.3.1.179	392.736	0		R507_num1	0	C180ACP_c + h_c + malACP_c --> ACP_c + C20OACP_c + co2_c	2.3.1.41,2.3.1.85,2.3.1.86,2.3.1.179	392.736	0		R507_num1	0	C180ACP_c + h_c + malACP_c --> ACP_c + C20OACP_c + co2_c	2.3.1.41,2.3.1.85,2.3.1.86,2.3.1.179	392.736	0		R507_num1
R508_num1	0	C20OACP_c + h_c + nadph_c --> C20HACP_c + nadp_c	1.1.1.100,1.1.1.-	392.736	0		R508_num1	0	C20OACP_c + h_c + nadph_c --> C20HACP_c + nadp_c	1.1.1.100,1.1.1.-	392.736	0		R508_num1	0	C20OACP_c + h_c + nadph_c --> C20HACP_c + nadp_c	1.1.1.100,1.1.1.-	392.736	0		R508_num1	0	C20OACP_c + h_c + nadph_c --> C20HACP_c + nadp_c	1.1.1.100,1.1.1.-	392.736	0		R508_num1	0	C20OACP_c + h_c + nadph_c --> C20HACP_c + nadp_c	1.1.1.100,1.1.1.-	392.736	0		R508_num1	0	C20OACP_c + h_c + nadph_c --> C20HACP_c + nadp_c	1.1.1.100,1.1.1.-	392.736	0		R508_num1	0	C20OACP_c + h_c + nadph_c --> C20HACP_c + nadp_c	1.1.1.100,1.1.1.-	392.736	0		R508_num1
R509_num1	3.49682e-19	C20HACP_c --> C20DACP_c + h2o_c	4.2.1.59,4.2.1.-	240.666	1.45297e-21		R509_num1	0	C20HACP_c --> C20DACP_c + h2o_c	4.2.1.59,4.2.1.-	240.666	0		R509_num1	0	C20HACP_c --> C20DACP_c + h2o_c	4.2.1.59,4.2.1.-	240.666	0		R509_num1	0	C20HACP_c --> C20DACP_c + h2o_c	4.2.1.59,4.2.1.-	240.666	0		R509_num1	0	C20HACP_c --> C20DACP_c + h2o_c	4.2.1.59,4.2.1.-	240.666	0		R509_num1	0	C20HACP_c --> C20DACP_c + h2o_c	4.2.1.59,4.2.1.-	240.666	0		R509_num1	0	C20HACP_c --> C20DACP_c + h2o_c	4.2.1.59,4.2.1.-	240.666	0		R509_num1
R510_num1	3.49682e-19	C20DACP_c + h_c + nadph_c --> C200ACP_c + nadp_c	1.3.1.9	3496.79	1.00001e-22		R510_num1	0	C20DACP_c + h_c + nadph_c --> C200ACP_c + nadp_c	1.3.1.9	3496.79	0		R510_num1	0	C20DACP_c + h_c + nadph_c --> C200ACP_c + nadp_c	1.3.1.9	3496.79	0		R510_num1	0	C20DACP_c + h_c + nadph_c --> C200ACP_c + nadp_c	1.3.1.9	3496.79	0		R510_num1	0	C20DACP_c + h_c + nadph_c --> C200ACP_c + nadp_c	1.3.1.9	3496.79	0		R510_num1	0	C20DACP_c + h_c + nadph_c --> C200ACP_c + nadp_c	1.3.1.9	3496.79	0		R510_num1	0	C20DACP_c + h_c + nadph_c --> C200ACP_c + nadp_c	1.3.1.9	3496.79	0		R510_num1
R511	0	C180ACP_c + 3.0 h_c + malACP_c + 2.0 nadph_c --> ACP_c + C200ACP_c + co2_c + h2o_c + 2.0 nadp_c	2.3.1.85	113.753	0		R511	0	C180ACP_c + 3.0 h_c + malACP_c + 2.0 nadph_c --> ACP_c + C200ACP_c + co2_c + h2o_c + 2.0 nadp_c	2.3.1.85	113.753	0		R511	0	C180ACP_c + 3.0 h_c + malACP_c + 2.0 nadph_c --> ACP_c + C200ACP_c + co2_c + h2o_c + 2.0 nadp_c	2.3.1.85	113.753	0		R511	0	C180ACP_c + 3.0 h_c + malACP_c + 2.0 nadph_c --> ACP_c + C200ACP_c + co2_c + h2o_c + 2.0 nadp_c	2.3.1.85	113.753	0		R511	0	C180ACP_c + 3.0 h_c + malACP_c + 2.0 nadph_c --> ACP_c + C200ACP_c + co2_c + h2o_c + 2.0 nadp_c	2.3.1.85	113.753	0		R511	0	C180ACP_c + 3.0 h_c + malACP_c + 2.0 nadph_c --> ACP_c + C200ACP_c + co2_c + h2o_c + 2.0 nadp_c	2.3.1.85	113.753	0		R511	0	C180ACP_c + 3.0 h_c + malACP_c + 2.0 nadph_c --> ACP_c + C200ACP_c + co2_c + h2o_c + 2.0 nadp_c	2.3.1.85	113.753	0		R511
R512_num1	0	ACP_c + ppcoa_c --> PROPACP_c + coa_c	2.3.1.38	240.666	0		R512_num1	0	ACP_c + ppcoa_c --> PROPACP_c + coa_c	2.3.1.38	240.666	0		R512_num1	0	ACP_c + ppcoa_c --> PROPACP_c + coa_c	2.3.1.38	240.666	0		R512_num1	0	ACP_c + ppcoa_c --> PROPACP_c + coa_c	2.3.1.38	240.666	0		R512_num1	0	ACP_c + ppcoa_c --> PROPACP_c + coa_c	2.3.1.38	240.666	0		R512_num1	0	ACP_c + ppcoa_c --> PROPACP_c + coa_c	2.3.1.38	240.666	0		R512_num1	0	ACP_c + ppcoa_c --> PROPACP_c + coa_c	2.3.1.38	240.666	0		R512_num1
R513_num1	0	PROPACP_c + malACP_c --> ACP_c + C5OACP_c + co2_c	2.3.1.41,2.3.1.85,2.3.1.86,2.3.1.179	392.736	0		R513_num1	0	PROPACP_c + malACP_c --> ACP_c + C5OACP_c + co2_c	2.3.1.41,2.3.1.85,2.3.1.86,2.3.1.179	392.736	0		R513_num1	0	PROPACP_c + malACP_c --> ACP_c + C5OACP_c + co2_c	2.3.1.41,2.3.1.85,2.3.1.86,2.3.1.179	392.736	0		R513_num1	0	PROPACP_c + malACP_c --> ACP_c + C5OACP_c + co2_c	2.3.1.41,2.3.1.85,2.3.1.86,2.3.1.179	392.736	0		R513_num1	0	PROPACP_c + malACP_c --> ACP_c + C5OACP_c + co2_c	2.3.1.41,2.3.1.85,2.3.1.86,2.3.1.179	392.736	0		R513_num1	0	PROPACP_c + malACP_c --> ACP_c + C5OACP_c + co2_c	2.3.1.41,2.3.1.85,2.3.1.86,2.3.1.179	392.736	0		R513_num1	0	PROPACP_c + malACP_c --> ACP_c + C5OACP_c + co2_c	2.3.1.41,2.3.1.85,2.3.1.86,2.3.1.179	392.736	0		R513_num1
R514_num1	0	C5OACP_c + h_c + nadph_c --> C5HACP_c + nadp_c	1.1.1.100,1.1.1.-	392.736	0		R514_num1	0	C5OACP_c + h_c + nadph_c --> C5HACP_c + nadp_c	1.1.1.100,1.1.1.-	392.736	0		R514_num1	0	C5OACP_c + h_c + nadph_c --> C5HACP_c + nadp_c	1.1.1.100,1.1.1.-	392.736	0		R514_num1	0	C5OACP_c + h_c + nadph_c --> C5HACP_c + nadp_c	1.1.1.100,1.1.1.-	392.736	0		R514_num1	0	C5OACP_c + h_c + nadph_c --> C5HACP_c + nadp_c	1.1.1.100,1.1.1.-	392.736	0		R514_num1	0	C5OACP_c + h_c + nadph_c --> C5HACP_c + nadp_c	1.1.1.100,1.1.1.-	392.736	0		R514_num1	0	C5OACP_c + h_c + nadph_c --> C5HACP_c + nadp_c	1.1.1.100,1.1.1.-	392.736	0		R514_num1
R515	0	C5HACP_c --> C5DACP_c + h2o_c	2.3.1.85	113.753	0		R515	0	C5HACP_c --> C5DACP_c + h2o_c	2.3.1.85	113.753	0		R515	0	C5HACP_c --> C5DACP_c + h2o_c	2.3.1.85	113.753	0		R515	0	C5HACP_c --> C5DACP_c + h2o_c	2.3.1.85	113.753	0		R515	0	C5HACP_c --> C5DACP_c + h2o_c	2.3.1.85	113.753	0		R515	0	C5HACP_c --> C5DACP_c + h2o_c	2.3.1.85	113.753	0		R515	0	C5HACP_c --> C5DACP_c + h2o_c	2.3.1.85	113.753	0		R515
R516_num1	8.40855e-16	C5DACP_c + h_c + nadph_c --> C50ACP_c + nadp_c	1.3.1.9	3496.79	2.40465e-19		R516_num1	0	C5DACP_c + h_c + nadph_c --> C50ACP_c + nadp_c	1.3.1.9	3496.79	0		R516_num1	0	C5DACP_c + h_c + nadph_c --> C50ACP_c + nadp_c	1.3.1.9	3496.79	0		R516_num1	-7.08512e-16	C5DACP_c + h_c + nadph_c --> C50ACP_c + nadp_c	1.3.1.9	3496.79	-2.02618e-19		R516_num1	-2.84211e-16	C5DACP_c + h_c + nadph_c --> C50ACP_c + nadp_c	1.3.1.9	3496.79	-8.12777e-20		R516_num1	2.56686e-16	C5DACP_c + h_c + nadph_c --> C50ACP_c + nadp_c	1.3.1.9	3496.79	7.34062e-20		R516_num1	0	C5DACP_c + h_c + nadph_c --> C50ACP_c + nadp_c	1.3.1.9	3496.79	0		R516_num1
R517	0	PROPACP_c + 2.0 h_c + malACP_c + 2.0 nadph_c --> ACP_c + C50ACP_c + co2_c + h2o_c + 2.0 nadp_c	2.3.1.85	113.753	0		R517	0	PROPACP_c + 2.0 h_c + malACP_c + 2.0 nadph_c --> ACP_c + C50ACP_c + co2_c + h2o_c + 2.0 nadp_c	2.3.1.85	113.753	0		R517	0	PROPACP_c + 2.0 h_c + malACP_c + 2.0 nadph_c --> ACP_c + C50ACP_c + co2_c + h2o_c + 2.0 nadp_c	2.3.1.85	113.753	0		R517	0	PROPACP_c + 2.0 h_c + malACP_c + 2.0 nadph_c --> ACP_c + C50ACP_c + co2_c + h2o_c + 2.0 nadp_c	2.3.1.85	113.753	0		R517	0	PROPACP_c + 2.0 h_c + malACP_c + 2.0 nadph_c --> ACP_c + C50ACP_c + co2_c + h2o_c + 2.0 nadp_c	2.3.1.85	113.753	0		R517	0	PROPACP_c + 2.0 h_c + malACP_c + 2.0 nadph_c --> ACP_c + C50ACP_c + co2_c + h2o_c + 2.0 nadp_c	2.3.1.85	113.753	0		R517	0	PROPACP_c + 2.0 h_c + malACP_c + 2.0 nadph_c --> ACP_c + C50ACP_c + co2_c + h2o_c + 2.0 nadp_c	2.3.1.85	113.753	0		R517
R518_num1	0	C50ACP_c + h_c + malACP_c --> ACP_c + C7OACP_c + co2_c	2.3.1.41,2.3.1.85,2.3.1.86,2.3.1.179	392.736	0		R518_num1	0	C50ACP_c + h_c + malACP_c --> ACP_c + C7OACP_c + co2_c	2.3.1.41,2.3.1.85,2.3.1.86,2.3.1.179	392.736	0		R518_num1	0	C50ACP_c + h_c + malACP_c --> ACP_c + C7OACP_c + co2_c	2.3.1.41,2.3.1.85,2.3.1.86,2.3.1.179	392.736	0		R518_num1	0	C50ACP_c + h_c + malACP_c --> ACP_c + C7OACP_c + co2_c	2.3.1.41,2.3.1.85,2.3.1.86,2.3.1.179	392.736	0		R518_num1	0	C50ACP_c + h_c + malACP_c --> ACP_c + C7OACP_c + co2_c	2.3.1.41,2.3.1.85,2.3.1.86,2.3.1.179	392.736	0		R518_num1	0	C50ACP_c + h_c + malACP_c --> ACP_c + C7OACP_c + co2_c	2.3.1.41,2.3.1.85,2.3.1.86,2.3.1.179	392.736	0		R518_num1	0	C50ACP_c + h_c + malACP_c --> ACP_c + C7OACP_c + co2_c	2.3.1.41,2.3.1.85,2.3.1.86,2.3.1.179	392.736	0		R518_num1
R519_num1	0	C7OACP_c + h_c + nadph_c --> C7HACP_c + nadp_c	1.1.1.100,1.1.1.-	392.736	0		R519_num1	0	C7OACP_c + h_c + nadph_c --> C7HACP_c + nadp_c	1.1.1.100,1.1.1.-	392.736	0		R519_num1	0	C7OACP_c + h_c + nadph_c --> C7HACP_c + nadp_c	1.1.1.100,1.1.1.-	392.736	0		R519_num1	0	C7OACP_c + h_c + nadph_c --> C7HACP_c + nadp_c	1.1.1.100,1.1.1.-	392.736	0		R519_num1	0	C7OACP_c + h_c + nadph_c --> C7HACP_c + nadp_c	1.1.1.100,1.1.1.-	392.736	0		R519_num1	0	C7OACP_c + h_c + nadph_c --> C7HACP_c + nadp_c	1.1.1.100,1.1.1.-	392.736	0		R519_num1	0	C7OACP_c + h_c + nadph_c --> C7HACP_c + nadp_c	1.1.1.100,1.1.1.-	392.736	0		R519_num1
R520	0	C7HACP_c --> C7DACP_c + h2o_c	2.3.1.85	113.753	0		R520	0	C7HACP_c --> C7DACP_c + h2o_c	2.3.1.85	113.753	0		R520	0	C7HACP_c --> C7DACP_c + h2o_c	2.3.1.85	113.753	0		R520	0	C7HACP_c --> C7DACP_c + h2o_c	2.3.1.85	113.753	0		R520	0	C7HACP_c --> C7DACP_c + h2o_c	2.3.1.85	113.753	0		R520	0	C7HACP_c --> C7DACP_c + h2o_c	2.3.1.85	113.753	0		R520	0	C7HACP_c --> C7DACP_c + h2o_c	2.3.1.85	113.753	0		R520
R521_num1	8.40855e-16	C7DACP_c + h_c + nadph_c --> C70ACP_c + nadp_c	1.3.1.9	3496.79	2.40465e-19		R521_num1	0	C7DACP_c + h_c + nadph_c --> C70ACP_c + nadp_c	1.3.1.9	3496.79	0		R521_num1	0	C7DACP_c + h_c + nadph_c --> C70ACP_c + nadp_c	1.3.1.9	3496.79	0		R521_num1	-7.08512e-16	C7DACP_c + h_c + nadph_c --> C70ACP_c + nadp_c	1.3.1.9	3496.79	-2.02618e-19		R521_num1	-2.84211e-16	C7DACP_c + h_c + nadph_c --> C70ACP_c + nadp_c	1.3.1.9	3496.79	-8.12777e-20		R521_num1	2.56686e-16	C7DACP_c + h_c + nadph_c --> C70ACP_c + nadp_c	1.3.1.9	3496.79	7.34062e-20		R521_num1	0	C7DACP_c + h_c + nadph_c --> C70ACP_c + nadp_c	1.3.1.9	3496.79	0		R521_num1
R522	0	C50ACP_c + 3.0 h_c + malACP_c + 2.0 nadph_c --> ACP_c + C70ACP_c + co2_c + h2o_c + 2.0 nadp_c	2.3.1.85	113.753	0		R522	0	C50ACP_c + 3.0 h_c + malACP_c + 2.0 nadph_c --> ACP_c + C70ACP_c + co2_c + h2o_c + 2.0 nadp_c	2.3.1.85	113.753	0		R522	0	C50ACP_c + 3.0 h_c + malACP_c + 2.0 nadph_c --> ACP_c + C70ACP_c + co2_c + h2o_c + 2.0 nadp_c	2.3.1.85	113.753	0		R522	0	C50ACP_c + 3.0 h_c + malACP_c + 2.0 nadph_c --> ACP_c + C70ACP_c + co2_c + h2o_c + 2.0 nadp_c	2.3.1.85	113.753	0		R522	0	C50ACP_c + 3.0 h_c + malACP_c + 2.0 nadph_c --> ACP_c + C70ACP_c + co2_c + h2o_c + 2.0 nadp_c	2.3.1.85	113.753	0		R522	0	C50ACP_c + 3.0 h_c + malACP_c + 2.0 nadph_c --> ACP_c + C70ACP_c + co2_c + h2o_c + 2.0 nadp_c	2.3.1.85	113.753	0		R522	0	C50ACP_c + 3.0 h_c + malACP_c + 2.0 nadph_c --> ACP_c + C70ACP_c + co2_c + h2o_c + 2.0 nadp_c	2.3.1.85	113.753	0		R522
R523_num1	0	C70ACP_c + h_c + malACP_c --> ACP_c + C9OACP_c + co2_c	2.3.1.41,2.3.1.85,2.3.1.86,2.3.1.179	392.736	0		R523_num1	0	C70ACP_c + h_c + malACP_c --> ACP_c + C9OACP_c + co2_c	2.3.1.41,2.3.1.85,2.3.1.86,2.3.1.179	392.736	0		R523_num1	0	C70ACP_c + h_c + malACP_c --> ACP_c + C9OACP_c + co2_c	2.3.1.41,2.3.1.85,2.3.1.86,2.3.1.179	392.736	0		R523_num1	0	C70ACP_c + h_c + malACP_c --> ACP_c + C9OACP_c + co2_c	2.3.1.41,2.3.1.85,2.3.1.86,2.3.1.179	392.736	0		R523_num1	0	C70ACP_c + h_c + malACP_c --> ACP_c + C9OACP_c + co2_c	2.3.1.41,2.3.1.85,2.3.1.86,2.3.1.179	392.736	0		R523_num1	0	C70ACP_c + h_c + malACP_c --> ACP_c + C9OACP_c + co2_c	2.3.1.41,2.3.1.85,2.3.1.86,2.3.1.179	392.736	0		R523_num1	0	C70ACP_c + h_c + malACP_c --> ACP_c + C9OACP_c + co2_c	2.3.1.41,2.3.1.85,2.3.1.86,2.3.1.179	392.736	0		R523_num1
R524_num1	0	C9OACP_c + h_c + nadph_c --> C9HACP_c + nadp_c	1.1.1.100,1.1.1.-	392.736	0		R524_num1	0	C9OACP_c + h_c + nadph_c --> C9HACP_c + nadp_c	1.1.1.100,1.1.1.-	392.736	0		R524_num1	0	C9OACP_c + h_c + nadph_c --> C9HACP_c + nadp_c	1.1.1.100,1.1.1.-	392.736	0		R524_num1	0	C9OACP_c + h_c + nadph_c --> C9HACP_c + nadp_c	1.1.1.100,1.1.1.-	392.736	0		R524_num1	0	C9OACP_c + h_c + nadph_c --> C9HACP_c + nadp_c	1.1.1.100,1.1.1.-	392.736	0		R524_num1	0	C9OACP_c + h_c + nadph_c --> C9HACP_c + nadp_c	1.1.1.100,1.1.1.-	392.736	0		R524_num1	0	C9OACP_c + h_c + nadph_c --> C9HACP_c + nadp_c	1.1.1.100,1.1.1.-	392.736	0		R524_num1
R525	0	C9HACP_c --> C9DACP_c + h2o_c	2.3.1.85	113.753	0		R525	0	C9HACP_c --> C9DACP_c + h2o_c	2.3.1.85	113.753	0		R525	0	C9HACP_c --> C9DACP_c + h2o_c	2.3.1.85	113.753	0		R525	0	C9HACP_c --> C9DACP_c + h2o_c	2.3.1.85	113.753	0		R525	0	C9HACP_c --> C9DACP_c + h2o_c	2.3.1.85	113.753	0		R525	0	C9HACP_c --> C9DACP_c + h2o_c	2.3.1.85	113.753	0		R525	0	C9HACP_c --> C9DACP_c + h2o_c	2.3.1.85	113.753	0		R525
R526_num1	8.40855e-16	C9DACP_c + h_c + nadph_c --> C90ACP_c + nadp_c	1.3.1.9	3496.79	2.40465e-19		R526_num1	0	C9DACP_c + h_c + nadph_c --> C90ACP_c + nadp_c	1.3.1.9	3496.79	0		R526_num1	0	C9DACP_c + h_c + nadph_c --> C90ACP_c + nadp_c	1.3.1.9	3496.79	0		R526_num1	-7.08512e-16	C9DACP_c + h_c + nadph_c --> C90ACP_c + nadp_c	1.3.1.9	3496.79	-2.02618e-19		R526_num1	-2.84211e-16	C9DACP_c + h_c + nadph_c --> C90ACP_c + nadp_c	1.3.1.9	3496.79	-8.12777e-20		R526_num1	2.56686e-16	C9DACP_c + h_c + nadph_c --> C90ACP_c + nadp_c	1.3.1.9	3496.79	7.34062e-20		R526_num1	0	C9DACP_c + h_c + nadph_c --> C90ACP_c + nadp_c	1.3.1.9	3496.79	0		R526_num1
R527	0	C70ACP_c + 3.0 h_c + malACP_c + 2.0 nadph_c --> ACP_c + C90ACP_c + co2_c + h2o_c + 2.0 nadp_c	2.3.1.85	113.753	0		R527	0	C70ACP_c + 3.0 h_c + malACP_c + 2.0 nadph_c --> ACP_c + C90ACP_c + co2_c + h2o_c + 2.0 nadp_c	2.3.1.85	113.753	0		R527	0	C70ACP_c + 3.0 h_c + malACP_c + 2.0 nadph_c --> ACP_c + C90ACP_c + co2_c + h2o_c + 2.0 nadp_c	2.3.1.85	113.753	0		R527	0	C70ACP_c + 3.0 h_c + malACP_c + 2.0 nadph_c --> ACP_c + C90ACP_c + co2_c + h2o_c + 2.0 nadp_c	2.3.1.85	113.753	0		R527	0	C70ACP_c + 3.0 h_c + malACP_c + 2.0 nadph_c --> ACP_c + C90ACP_c + co2_c + h2o_c + 2.0 nadp_c	2.3.1.85	113.753	0		R527	0	C70ACP_c + 3.0 h_c + malACP_c + 2.0 nadph_c --> ACP_c + C90ACP_c + co2_c + h2o_c + 2.0 nadp_c	2.3.1.85	113.753	0		R527	0	C70ACP_c + 3.0 h_c + malACP_c + 2.0 nadph_c --> ACP_c + C90ACP_c + co2_c + h2o_c + 2.0 nadp_c	2.3.1.85	113.753	0		R527
R528_num1	0	C90ACP_c + h_c + malACP_c --> ACP_c + C11OACP_c + co2_c	2.3.1.41,2.3.1.85,2.3.1.86,2.3.1.179	392.736	0		R528_num1	0	C90ACP_c + h_c + malACP_c --> ACP_c + C11OACP_c + co2_c	2.3.1.41,2.3.1.85,2.3.1.86,2.3.1.179	392.736	0		R528_num1	0	C90ACP_c + h_c + malACP_c --> ACP_c + C11OACP_c + co2_c	2.3.1.41,2.3.1.85,2.3.1.86,2.3.1.179	392.736	0		R528_num1	0	C90ACP_c + h_c + malACP_c --> ACP_c + C11OACP_c + co2_c	2.3.1.41,2.3.1.85,2.3.1.86,2.3.1.179	392.736	0		R528_num1	0	C90ACP_c + h_c + malACP_c --> ACP_c + C11OACP_c + co2_c	2.3.1.41,2.3.1.85,2.3.1.86,2.3.1.179	392.736	0		R528_num1	0	C90ACP_c + h_c + malACP_c --> ACP_c + C11OACP_c + co2_c	2.3.1.41,2.3.1.85,2.3.1.86,2.3.1.179	392.736	0		R528_num1	0	C90ACP_c + h_c + malACP_c --> ACP_c + C11OACP_c + co2_c	2.3.1.41,2.3.1.85,2.3.1.86,2.3.1.179	392.736	0		R528_num1
R529_num1	0	C11OACP_c + h_c + nadph_c --> C11HACP_c + nadp_c	1.1.1.100,1.1.1.-	392.736	0		R529_num1	0	C11OACP_c + h_c + nadph_c --> C11HACP_c + nadp_c	1.1.1.100,1.1.1.-	392.736	0		R529_num1	0	C11OACP_c + h_c + nadph_c --> C11HACP_c + nadp_c	1.1.1.100,1.1.1.-	392.736	0		R529_num1	0	C11OACP_c + h_c + nadph_c --> C11HACP_c + nadp_c	1.1.1.100,1.1.1.-	392.736	0		R529_num1	0	C11OACP_c + h_c + nadph_c --> C11HACP_c + nadp_c	1.1.1.100,1.1.1.-	392.736	0		R529_num1	0	C11OACP_c + h_c + nadph_c --> C11HACP_c + nadp_c	1.1.1.100,1.1.1.-	392.736	0		R529_num1	0	C11OACP_c + h_c + nadph_c --> C11HACP_c + nadp_c	1.1.1.100,1.1.1.-	392.736	0		R529_num1
R530	0	C11HACP_c --> C11DACP_c + h2o_c	2.3.1.85	113.753	0		R530	0	C11HACP_c --> C11DACP_c + h2o_c	2.3.1.85	113.753	0		R530	0	C11HACP_c --> C11DACP_c + h2o_c	2.3.1.85	113.753	0		R530	0	C11HACP_c --> C11DACP_c + h2o_c	2.3.1.85	113.753	0		R530	0	C11HACP_c --> C11DACP_c + h2o_c	2.3.1.85	113.753	0		R530	0	C11HACP_c --> C11DACP_c + h2o_c	2.3.1.85	113.753	0		R530	0	C11HACP_c --> C11DACP_c + h2o_c	2.3.1.85	113.753	0		R530
R531_num1	8.40855e-16	C11DACP_c + h_c + nadph_c --> C110ACP_c + nadp_c	1.3.1.9	3496.79	2.40465e-19		R531_num1	0	C11DACP_c + h_c + nadph_c --> C110ACP_c + nadp_c	1.3.1.9	3496.79	0		R531_num1	0	C11DACP_c + h_c + nadph_c --> C110ACP_c + nadp_c	1.3.1.9	3496.79	0		R531_num1	-7.08512e-16	C11DACP_c + h_c + nadph_c --> C110ACP_c + nadp_c	1.3.1.9	3496.79	-2.02618e-19		R531_num1	-2.84211e-16	C11DACP_c + h_c + nadph_c --> C110ACP_c + nadp_c	1.3.1.9	3496.79	-8.12777e-20		R531_num1	2.56686e-16	C11DACP_c + h_c + nadph_c --> C110ACP_c + nadp_c	1.3.1.9	3496.79	7.34062e-20		R531_num1	0	C11DACP_c + h_c + nadph_c --> C110ACP_c + nadp_c	1.3.1.9	3496.79	0		R531_num1
R532	0	C90ACP_c + 3.0 h_c + malACP_c + 2.0 nadph_c --> ACP_c + C110ACP_c + co2_c + h2o_c + 2.0 nadp_c	2.3.1.85	113.753	0		R532	0	C90ACP_c + 3.0 h_c + malACP_c + 2.0 nadph_c --> ACP_c + C110ACP_c + co2_c + h2o_c + 2.0 nadp_c	2.3.1.85	113.753	0		R532	0	C90ACP_c + 3.0 h_c + malACP_c + 2.0 nadph_c --> ACP_c + C110ACP_c + co2_c + h2o_c + 2.0 nadp_c	2.3.1.85	113.753	0		R532	0	C90ACP_c + 3.0 h_c + malACP_c + 2.0 nadph_c --> ACP_c + C110ACP_c + co2_c + h2o_c + 2.0 nadp_c	2.3.1.85	113.753	0		R532	0	C90ACP_c + 3.0 h_c + malACP_c + 2.0 nadph_c --> ACP_c + C110ACP_c + co2_c + h2o_c + 2.0 nadp_c	2.3.1.85	113.753	0		R532	0	C90ACP_c + 3.0 h_c + malACP_c + 2.0 nadph_c --> ACP_c + C110ACP_c + co2_c + h2o_c + 2.0 nadp_c	2.3.1.85	113.753	0		R532	0	C90ACP_c + 3.0 h_c + malACP_c + 2.0 nadph_c --> ACP_c + C110ACP_c + co2_c + h2o_c + 2.0 nadp_c	2.3.1.85	113.753	0		R532
R533_num1	0	C110ACP_c + h_c + malACP_c --> ACP_c + C13OACP_c + co2_c	2.3.1.41,2.3.1.85,2.3.1.86,2.3.1.179	392.736	0		R533_num1	0	C110ACP_c + h_c + malACP_c --> ACP_c + C13OACP_c + co2_c	2.3.1.41,2.3.1.85,2.3.1.86,2.3.1.179	392.736	0		R533_num1	0	C110ACP_c + h_c + malACP_c --> ACP_c + C13OACP_c + co2_c	2.3.1.41,2.3.1.85,2.3.1.86,2.3.1.179	392.736	0		R533_num1	0	C110ACP_c + h_c + malACP_c --> ACP_c + C13OACP_c + co2_c	2.3.1.41,2.3.1.85,2.3.1.86,2.3.1.179	392.736	0		R533_num1	0	C110ACP_c + h_c + malACP_c --> ACP_c + C13OACP_c + co2_c	2.3.1.41,2.3.1.85,2.3.1.86,2.3.1.179	392.736	0		R533_num1	0	C110ACP_c + h_c + malACP_c --> ACP_c + C13OACP_c + co2_c	2.3.1.41,2.3.1.85,2.3.1.86,2.3.1.179	392.736	0		R533_num1	0	C110ACP_c + h_c + malACP_c --> ACP_c + C13OACP_c + co2_c	2.3.1.41,2.3.1.85,2.3.1.86,2.3.1.179	392.736	0		R533_num1
R534_num1	0	C13OACP_c + h_c + nadph_c --> C13HACP_c + nadp_c	1.1.1.100,1.1.1.-	392.736	0		R534_num1	0	C13OACP_c + h_c + nadph_c --> C13HACP_c + nadp_c	1.1.1.100,1.1.1.-	392.736	0		R534_num1	0	C13OACP_c + h_c + nadph_c --> C13HACP_c + nadp_c	1.1.1.100,1.1.1.-	392.736	0		R534_num1	0	C13OACP_c + h_c + nadph_c --> C13HACP_c + nadp_c	1.1.1.100,1.1.1.-	392.736	0		R534_num1	0	C13OACP_c + h_c + nadph_c --> C13HACP_c + nadp_c	1.1.1.100,1.1.1.-	392.736	0		R534_num1	0	C13OACP_c + h_c + nadph_c --> C13HACP_c + nadp_c	1.1.1.100,1.1.1.-	392.736	0		R534_num1	0	C13OACP_c + h_c + nadph_c --> C13HACP_c + nadp_c	1.1.1.100,1.1.1.-	392.736	0		R534_num1
R535	0	C13HACP_c --> C13DACP_c + h2o_c	2.3.1.85	113.753	0		R535	0	C13HACP_c --> C13DACP_c + h2o_c	2.3.1.85	113.753	0		R535	0	C13HACP_c --> C13DACP_c + h2o_c	2.3.1.85	113.753	0		R535	0	C13HACP_c --> C13DACP_c + h2o_c	2.3.1.85	113.753	0		R535	0	C13HACP_c --> C13DACP_c + h2o_c	2.3.1.85	113.753	0		R535	0	C13HACP_c --> C13DACP_c + h2o_c	2.3.1.85	113.753	0		R535	0	C13HACP_c --> C13DACP_c + h2o_c	2.3.1.85	113.753	0		R535
R536_num1	8.40855e-16	C13DACP_c + h_c + nadph_c --> C130ACP_c + nadp_c	1.3.1.9	3496.79	2.40465e-19		R536_num1	0	C13DACP_c + h_c + nadph_c --> C130ACP_c + nadp_c	1.3.1.9	3496.79	0		R536_num1	0	C13DACP_c + h_c + nadph_c --> C130ACP_c + nadp_c	1.3.1.9	3496.79	0		R536_num1	-7.08512e-16	C13DACP_c + h_c + nadph_c --> C130ACP_c + nadp_c	1.3.1.9	3496.79	-2.02618e-19		R536_num1	-2.84211e-16	C13DACP_c + h_c + nadph_c --> C130ACP_c + nadp_c	1.3.1.9	3496.79	-8.12777e-20		R536_num1	2.56686e-16	C13DACP_c + h_c + nadph_c --> C130ACP_c + nadp_c	1.3.1.9	3496.79	7.34062e-20		R536_num1	0	C13DACP_c + h_c + nadph_c --> C130ACP_c + nadp_c	1.3.1.9	3496.79	0		R536_num1
R537	0	C110ACP_c + 3.0 h_c + malACP_c + 2.0 nadph_c --> ACP_c + C130ACP_c + co2_c + h2o_c + 2.0 nadp_c	2.3.1.85	113.753	0		R537	0	C110ACP_c + 3.0 h_c + malACP_c + 2.0 nadph_c --> ACP_c + C130ACP_c + co2_c + h2o_c + 2.0 nadp_c	2.3.1.85	113.753	0		R537	0	C110ACP_c + 3.0 h_c + malACP_c + 2.0 nadph_c --> ACP_c + C130ACP_c + co2_c + h2o_c + 2.0 nadp_c	2.3.1.85	113.753	0		R537	0	C110ACP_c + 3.0 h_c + malACP_c + 2.0 nadph_c --> ACP_c + C130ACP_c + co2_c + h2o_c + 2.0 nadp_c	2.3.1.85	113.753	0		R537	0	C110ACP_c + 3.0 h_c + malACP_c + 2.0 nadph_c --> ACP_c + C130ACP_c + co2_c + h2o_c + 2.0 nadp_c	2.3.1.85	113.753	0		R537	0	C110ACP_c + 3.0 h_c + malACP_c + 2.0 nadph_c --> ACP_c + C130ACP_c + co2_c + h2o_c + 2.0 nadp_c	2.3.1.85	113.753	0		R537	0	C110ACP_c + 3.0 h_c + malACP_c + 2.0 nadph_c --> ACP_c + C130ACP_c + co2_c + h2o_c + 2.0 nadp_c	2.3.1.85	113.753	0		R537
R538_num1	0	C130ACP_c + h_c + malACP_c --> ACP_c + C15OACP_c + co2_c	2.3.1.41,2.3.1.85,2.3.1.86,2.3.1.179	392.736	0		R538_num1	0	C130ACP_c + h_c + malACP_c --> ACP_c + C15OACP_c + co2_c	2.3.1.41,2.3.1.85,2.3.1.86,2.3.1.179	392.736	0		R538_num1	0	C130ACP_c + h_c + malACP_c --> ACP_c + C15OACP_c + co2_c	2.3.1.41,2.3.1.85,2.3.1.86,2.3.1.179	392.736	0		R538_num1	0	C130ACP_c + h_c + malACP_c --> ACP_c + C15OACP_c + co2_c	2.3.1.41,2.3.1.85,2.3.1.86,2.3.1.179	392.736	0		R538_num1	0	C130ACP_c + h_c + malACP_c --> ACP_c + C15OACP_c + co2_c	2.3.1.41,2.3.1.85,2.3.1.86,2.3.1.179	392.736	0		R538_num1	0	C130ACP_c + h_c + malACP_c --> ACP_c + C15OACP_c + co2_c	2.3.1.41,2.3.1.85,2.3.1.86,2.3.1.179	392.736	0		R538_num1	0	C130ACP_c + h_c + malACP_c --> ACP_c + C15OACP_c + co2_c	2.3.1.41,2.3.1.85,2.3.1.86,2.3.1.179	392.736	0		R538_num1
R539_num1	0	C15OACP_c + h_c + nadph_c --> C15HACP_c + nadp_c	1.1.1.100,1.1.1.-	392.736	0		R539_num1	0	C15OACP_c + h_c + nadph_c --> C15HACP_c + nadp_c	1.1.1.100,1.1.1.-	392.736	0		R539_num1	0	C15OACP_c + h_c + nadph_c --> C15HACP_c + nadp_c	1.1.1.100,1.1.1.-	392.736	0		R539_num1	0	C15OACP_c + h_c + nadph_c --> C15HACP_c + nadp_c	1.1.1.100,1.1.1.-	392.736	0		R539_num1	0	C15OACP_c + h_c + nadph_c --> C15HACP_c + nadp_c	1.1.1.100,1.1.1.-	392.736	0		R539_num1	0	C15OACP_c + h_c + nadph_c --> C15HACP_c + nadp_c	1.1.1.100,1.1.1.-	392.736	0		R539_num1	0	C15OACP_c + h_c + nadph_c --> C15HACP_c + nadp_c	1.1.1.100,1.1.1.-	392.736	0		R539_num1
R540	0	C15HACP_c --> C15DACP_c + h2o_c	2.3.1.85	113.753	0		R540	0	C15HACP_c --> C15DACP_c + h2o_c	2.3.1.85	113.753	0		R540	0	C15HACP_c --> C15DACP_c + h2o_c	2.3.1.85	113.753	0		R540	0	C15HACP_c --> C15DACP_c + h2o_c	2.3.1.85	113.753	0		R540	0	C15HACP_c --> C15DACP_c + h2o_c	2.3.1.85	113.753	0		R540	0	C15HACP_c --> C15DACP_c + h2o_c	2.3.1.85	113.753	0		R540	0	C15HACP_c --> C15DACP_c + h2o_c	2.3.1.85	113.753	0		R540
R541_num1	8.40855e-16	C15DACP_c + h_c + nadph_c --> C150ACP_c + nadp_c	1.3.1.9	3496.79	2.40465e-19		R541_num1	0	C15DACP_c + h_c + nadph_c --> C150ACP_c + nadp_c	1.3.1.9	3496.79	0		R541_num1	0	C15DACP_c + h_c + nadph_c --> C150ACP_c + nadp_c	1.3.1.9	3496.79	0		R541_num1	2.12554e-15	C15DACP_c + h_c + nadph_c --> C150ACP_c + nadp_c	1.3.1.9	3496.79	6.07854e-19		R541_num1	-5.16747e-17	C15DACP_c + h_c + nadph_c --> C150ACP_c + nadp_c	1.3.1.9	3496.79	-1.47778e-20		R541_num1	2.56686e-16	C15DACP_c + h_c + nadph_c --> C150ACP_c + nadp_c	1.3.1.9	3496.79	7.34062e-20		R541_num1	0	C15DACP_c + h_c + nadph_c --> C150ACP_c + nadp_c	1.3.1.9	3496.79	0		R541_num1
R542	0	C130ACP_c + 3.0 h_c + malACP_c + 2.0 nadph_c --> ACP_c + C150ACP_c + co2_c + h2o_c + 2.0 nadp_c	2.3.1.85	113.753	0		R542	0	C130ACP_c + 3.0 h_c + malACP_c + 2.0 nadph_c --> ACP_c + C150ACP_c + co2_c + h2o_c + 2.0 nadp_c	2.3.1.85	113.753	0		R542	0	C130ACP_c + 3.0 h_c + malACP_c + 2.0 nadph_c --> ACP_c + C150ACP_c + co2_c + h2o_c + 2.0 nadp_c	2.3.1.85	113.753	0		R542	0	C130ACP_c + 3.0 h_c + malACP_c + 2.0 nadph_c --> ACP_c + C150ACP_c + co2_c + h2o_c + 2.0 nadp_c	2.3.1.85	113.753	0		R542	0	C130ACP_c + 3.0 h_c + malACP_c + 2.0 nadph_c --> ACP_c + C150ACP_c + co2_c + h2o_c + 2.0 nadp_c	2.3.1.85	113.753	0		R542	0	C130ACP_c + 3.0 h_c + malACP_c + 2.0 nadph_c --> ACP_c + C150ACP_c + co2_c + h2o_c + 2.0 nadp_c	2.3.1.85	113.753	0		R542	0	C130ACP_c + 3.0 h_c + malACP_c + 2.0 nadph_c --> ACP_c + C150ACP_c + co2_c + h2o_c + 2.0 nadp_c	2.3.1.85	113.753	0		R542
R543_num1	0	C150ACP_c + h_c + malACP_c --> ACP_c + C17OACP_c + co2_c	2.3.1.41,2.3.1.85,2.3.1.86,2.3.1.179	392.736	0		R543_num1	0	C150ACP_c + h_c + malACP_c --> ACP_c + C17OACP_c + co2_c	2.3.1.41,2.3.1.85,2.3.1.86,2.3.1.179	392.736	0		R543_num1	0	C150ACP_c + h_c + malACP_c --> ACP_c + C17OACP_c + co2_c	2.3.1.41,2.3.1.85,2.3.1.86,2.3.1.179	392.736	0		R543_num1	0	C150ACP_c + h_c + malACP_c --> ACP_c + C17OACP_c + co2_c	2.3.1.41,2.3.1.85,2.3.1.86,2.3.1.179	392.736	0		R543_num1	0	C150ACP_c + h_c + malACP_c --> ACP_c + C17OACP_c + co2_c	2.3.1.41,2.3.1.85,2.3.1.86,2.3.1.179	392.736	0		R543_num1	0	C150ACP_c + h_c + malACP_c --> ACP_c + C17OACP_c + co2_c	2.3.1.41,2.3.1.85,2.3.1.86,2.3.1.179	392.736	0		R543_num1	0	C150ACP_c + h_c + malACP_c --> ACP_c + C17OACP_c + co2_c	2.3.1.41,2.3.1.85,2.3.1.86,2.3.1.179	392.736	0		R543_num1
R544_num1	0	C17OACP_c + h_c + nadph_c --> C17HACP_c + nadp_c	1.1.1.100,1.1.1.-	392.736	0		R544_num1	0	C17OACP_c + h_c + nadph_c --> C17HACP_c + nadp_c	1.1.1.100,1.1.1.-	392.736	0		R544_num1	0	C17OACP_c + h_c + nadph_c --> C17HACP_c + nadp_c	1.1.1.100,1.1.1.-	392.736	0		R544_num1	0	C17OACP_c + h_c + nadph_c --> C17HACP_c + nadp_c	1.1.1.100,1.1.1.-	392.736	0		R544_num1	0	C17OACP_c + h_c + nadph_c --> C17HACP_c + nadp_c	1.1.1.100,1.1.1.-	392.736	0		R544_num1	0	C17OACP_c + h_c + nadph_c --> C17HACP_c + nadp_c	1.1.1.100,1.1.1.-	392.736	0		R544_num1	0	C17OACP_c + h_c + nadph_c --> C17HACP_c + nadp_c	1.1.1.100,1.1.1.-	392.736	0		R544_num1
R545	0	C17HACP_c --> C17DACP_c + h2o_c	2.3.1.85	113.753	0		R545	0	C17HACP_c --> C17DACP_c + h2o_c	2.3.1.85	113.753	0		R545	0	C17HACP_c --> C17DACP_c + h2o_c	2.3.1.85	113.753	0		R545	0	C17HACP_c --> C17DACP_c + h2o_c	2.3.1.85	113.753	0		R545	0	C17HACP_c --> C17DACP_c + h2o_c	2.3.1.85	113.753	0		R545	0	C17HACP_c --> C17DACP_c + h2o_c	2.3.1.85	113.753	0		R545	0	C17HACP_c --> C17DACP_c + h2o_c	2.3.1.85	113.753	0		R545
R546_num1	8.40855e-16	C17DACP_c + h_c + nadph_c --> C170ACP_c + nadp_c	1.3.1.9	3496.79	2.40465e-19		R546_num1	0	C17DACP_c + h_c + nadph_c --> C170ACP_c + nadp_c	1.3.1.9	3496.79	0		R546_num1	0	C17DACP_c + h_c + nadph_c --> C170ACP_c + nadp_c	1.3.1.9	3496.79	0		R546_num1	2.12554e-15	C17DACP_c + h_c + nadph_c --> C170ACP_c + nadp_c	1.3.1.9	3496.79	6.07854e-19		R546_num1	-5.16747e-17	C17DACP_c + h_c + nadph_c --> C170ACP_c + nadp_c	1.3.1.9	3496.79	-1.47778e-20		R546_num1	2.56686e-16	C17DACP_c + h_c + nadph_c --> C170ACP_c + nadp_c	1.3.1.9	3496.79	7.34062e-20		R546_num1	0	C17DACP_c + h_c + nadph_c --> C170ACP_c + nadp_c	1.3.1.9	3496.79	0		R546_num1
R547	0	C150ACP_c + 3.0 h_c + malACP_c + 2.0 nadph_c --> ACP_c + C170ACP_c + co2_c + h2o_c + 2.0 nadp_c	2.3.1.85	113.753	0		R547	0	C150ACP_c + 3.0 h_c + malACP_c + 2.0 nadph_c --> ACP_c + C170ACP_c + co2_c + h2o_c + 2.0 nadp_c	2.3.1.85	113.753	0		R547	0	C150ACP_c + 3.0 h_c + malACP_c + 2.0 nadph_c --> ACP_c + C170ACP_c + co2_c + h2o_c + 2.0 nadp_c	2.3.1.85	113.753	0		R547	0	C150ACP_c + 3.0 h_c + malACP_c + 2.0 nadph_c --> ACP_c + C170ACP_c + co2_c + h2o_c + 2.0 nadp_c	2.3.1.85	113.753	0		R547	0	C150ACP_c + 3.0 h_c + malACP_c + 2.0 nadph_c --> ACP_c + C170ACP_c + co2_c + h2o_c + 2.0 nadp_c	2.3.1.85	113.753	0		R547	0	C150ACP_c + 3.0 h_c + malACP_c + 2.0 nadph_c --> ACP_c + C170ACP_c + co2_c + h2o_c + 2.0 nadp_c	2.3.1.85	113.753	0		R547	0	C150ACP_c + 3.0 h_c + malACP_c + 2.0 nadph_c --> ACP_c + C170ACP_c + co2_c + h2o_c + 2.0 nadp_c	2.3.1.85	113.753	0		R547
R548_num1	0	C170ACP_c + h_c + malACP_c --> ACP_c + C19OACP_c + co2_c	2.3.1.41,2.3.1.85,2.3.1.86,2.3.1.179	392.736	0		R548_num1	0	C170ACP_c + h_c + malACP_c --> ACP_c + C19OACP_c + co2_c	2.3.1.41,2.3.1.85,2.3.1.86,2.3.1.179	392.736	0		R548_num1	0	C170ACP_c + h_c + malACP_c --> ACP_c + C19OACP_c + co2_c	2.3.1.41,2.3.1.85,2.3.1.86,2.3.1.179	392.736	0		R548_num1	0	C170ACP_c + h_c + malACP_c --> ACP_c + C19OACP_c + co2_c	2.3.1.41,2.3.1.85,2.3.1.86,2.3.1.179	392.736	0		R548_num1	0	C170ACP_c + h_c + malACP_c --> ACP_c + C19OACP_c + co2_c	2.3.1.41,2.3.1.85,2.3.1.86,2.3.1.179	392.736	0		R548_num1	0	C170ACP_c + h_c + malACP_c --> ACP_c + C19OACP_c + co2_c	2.3.1.41,2.3.1.85,2.3.1.86,2.3.1.179	392.736	0		R548_num1	0	C170ACP_c + h_c + malACP_c --> ACP_c + C19OACP_c + co2_c	2.3.1.41,2.3.1.85,2.3.1.86,2.3.1.179	392.736	0		R548_num1
R549_num1	0	C19OACP_c + h_c + nadph_c --> C19HACP_c + nadp_c	1.1.1.100,1.1.1.-	392.736	0		R549_num1	0	C19OACP_c + h_c + nadph_c --> C19HACP_c + nadp_c	1.1.1.100,1.1.1.-	392.736	0		R549_num1	0	C19OACP_c + h_c + nadph_c --> C19HACP_c + nadp_c	1.1.1.100,1.1.1.-	392.736	0		R549_num1	0	C19OACP_c + h_c + nadph_c --> C19HACP_c + nadp_c	1.1.1.100,1.1.1.-	392.736	0		R549_num1	0	C19OACP_c + h_c + nadph_c --> C19HACP_c + nadp_c	1.1.1.100,1.1.1.-	392.736	0		R549_num1	0	C19OACP_c + h_c + nadph_c --> C19HACP_c + nadp_c	1.1.1.100,1.1.1.-	392.736	0		R549_num1	0	C19OACP_c + h_c + nadph_c --> C19HACP_c + nadp_c	1.1.1.100,1.1.1.-	392.736	0		R549_num1
R550	0	C19HACP_c --> C19DACP_c + h2o_c	2.3.1.85	113.753	0		R550	0	C19HACP_c --> C19DACP_c + h2o_c	2.3.1.85	113.753	0		R550	0	C19HACP_c --> C19DACP_c + h2o_c	2.3.1.85	113.753	0		R550	0	C19HACP_c --> C19DACP_c + h2o_c	2.3.1.85	113.753	0		R550	0	C19HACP_c --> C19DACP_c + h2o_c	2.3.1.85	113.753	0		R550	0	C19HACP_c --> C19DACP_c + h2o_c	2.3.1.85	113.753	0		R550	0	C19HACP_c --> C19DACP_c + h2o_c	2.3.1.85	113.753	0		R550
R551_num1	8.39456e-16	C19DACP_c + h_c + nadph_c --> C190ACP_c + nadp_c	1.3.1.9	3496.79	2.40065e-19		R551_num1	0	C19DACP_c + h_c + nadph_c --> C190ACP_c + nadp_c	1.3.1.9	3496.79	0		R551_num1	0	C19DACP_c + h_c + nadph_c --> C190ACP_c + nadp_c	1.3.1.9	3496.79	0		R551_num1	0	C19DACP_c + h_c + nadph_c --> C190ACP_c + nadp_c	1.3.1.9	3496.79	0		R551_num1	0	C19DACP_c + h_c + nadph_c --> C190ACP_c + nadp_c	1.3.1.9	3496.79	0		R551_num1	0	C19DACP_c + h_c + nadph_c --> C190ACP_c + nadp_c	1.3.1.9	3496.79	0		R551_num1	0	C19DACP_c + h_c + nadph_c --> C190ACP_c + nadp_c	1.3.1.9	3496.79	0		R551_num1
R552	0	C170ACP_c + 3.0 h_c + malACP_c + 2.0 nadph_c --> ACP_c + C190ACP_c + co2_c + h2o_c + 2.0 nadp_c	2.3.1.85	113.753	0		R552	0	C170ACP_c + 3.0 h_c + malACP_c + 2.0 nadph_c --> ACP_c + C190ACP_c + co2_c + h2o_c + 2.0 nadp_c	2.3.1.85	113.753	0		R552	0	C170ACP_c + 3.0 h_c + malACP_c + 2.0 nadph_c --> ACP_c + C190ACP_c + co2_c + h2o_c + 2.0 nadp_c	2.3.1.85	113.753	0		R552	0	C170ACP_c + 3.0 h_c + malACP_c + 2.0 nadph_c --> ACP_c + C190ACP_c + co2_c + h2o_c + 2.0 nadp_c	2.3.1.85	113.753	0		R552	0	C170ACP_c + 3.0 h_c + malACP_c + 2.0 nadph_c --> ACP_c + C190ACP_c + co2_c + h2o_c + 2.0 nadp_c	2.3.1.85	113.753	0		R552	0	C170ACP_c + 3.0 h_c + malACP_c + 2.0 nadph_c --> ACP_c + C190ACP_c + co2_c + h2o_c + 2.0 nadp_c	2.3.1.85	113.753	0		R552	0	C170ACP_c + 3.0 h_c + malACP_c + 2.0 nadph_c --> ACP_c + C190ACP_c + co2_c + h2o_c + 2.0 nadp_c	2.3.1.85	113.753	0		R552
R553_num1	0	C40ACP_c + h2o_c --> ACP_c + C40_c + h_c	3.1.2.14	240.666	0		R553_num1	0	C40ACP_c + h2o_c --> ACP_c + C40_c + h_c	3.1.2.14	240.666	0		R553_num1	0	C40ACP_c + h2o_c --> ACP_c + C40_c + h_c	3.1.2.14	240.666	0		R553_num1	0	C40ACP_c + h2o_c --> ACP_c + C40_c + h_c	3.1.2.14	240.666	0		R553_num1	0	C40ACP_c + h2o_c --> ACP_c + C40_c + h_c	3.1.2.14	240.666	0		R553_num1	0	C40ACP_c + h2o_c --> ACP_c + C40_c + h_c	3.1.2.14	240.666	0		R553_num1	0	C40ACP_c + h2o_c --> ACP_c + C40_c + h_c	3.1.2.14	240.666	0		R553_num1
R554_num1	0	C60ACP_c + h2o_c --> ACP_c + h_c + hxa_c	3.1.2.14	240.666	0		R554_num1	0	C60ACP_c + h2o_c --> ACP_c + h_c + hxa_c	3.1.2.14	240.666	0		R554_num1	0	C60ACP_c + h2o_c --> ACP_c + h_c + hxa_c	3.1.2.14	240.666	0		R554_num1	0	C60ACP_c + h2o_c --> ACP_c + h_c + hxa_c	3.1.2.14	240.666	0		R554_num1	0	C60ACP_c + h2o_c --> ACP_c + h_c + hxa_c	3.1.2.14	240.666	0		R554_num1	0	C60ACP_c + h2o_c --> ACP_c + h_c + hxa_c	3.1.2.14	240.666	0		R554_num1	0	C60ACP_c + h2o_c --> ACP_c + h_c + hxa_c	3.1.2.14	240.666	0		R554_num1
R555_num1	1.28217e-18	C140ACP_c + h2o_c --> ACP_c + C140_c + h_c	3.1.2.14	240.666	5.32757e-21		R555_num1	0	C140ACP_c + h2o_c --> ACP_c + C140_c + h_c	3.1.2.14	240.666	0		R555_num1	-1.1277e-19	C140ACP_c + h2o_c --> ACP_c + C140_c + h_c	3.1.2.14	240.666	-4.68576e-22		R555_num1	0	C140ACP_c + h2o_c --> ACP_c + C140_c + h_c	3.1.2.14	240.666	0		R555_num1	0	C140ACP_c + h2o_c --> ACP_c + C140_c + h_c	3.1.2.14	240.666	0		R555_num1	0	C140ACP_c + h2o_c --> ACP_c + C140_c + h_c	3.1.2.14	240.666	0		R555_num1	0	C140ACP_c + h2o_c --> ACP_c + C140_c + h_c	3.1.2.14	240.666	0		R555_num1
R556_num1	2.24379e-18	C141ACP_c + h2o_c --> ACP_c + C141_c + h_c	3.1.2.14	240.666	9.32325e-21		R556_num1	0	C141ACP_c + h2o_c --> ACP_c + C141_c + h_c	3.1.2.14	240.666	0		R556_num1	0	C141ACP_c + h2o_c --> ACP_c + C141_c + h_c	3.1.2.14	240.666	0		R556_num1	0	C141ACP_c + h2o_c --> ACP_c + C141_c + h_c	3.1.2.14	240.666	0		R556_num1	0	C141ACP_c + h2o_c --> ACP_c + C141_c + h_c	3.1.2.14	240.666	0		R556_num1	0	C141ACP_c + h2o_c --> ACP_c + C141_c + h_c	3.1.2.14	240.666	0		R556_num1	0	C141ACP_c + h2o_c --> ACP_c + C141_c + h_c	3.1.2.14	240.666	0		R556_num1
R557_num1	0	C150ACP_c + h2o_c --> ACP_c + C150_c + h_c	3.1.2.14	240.666	0		R557_num1	0	C150ACP_c + h2o_c --> ACP_c + C150_c + h_c	3.1.2.14	240.666	0		R557_num1	0	C150ACP_c + h2o_c --> ACP_c + C150_c + h_c	3.1.2.14	240.666	0		R557_num1	0	C150ACP_c + h2o_c --> ACP_c + C150_c + h_c	3.1.2.14	240.666	0		R557_num1	0	C150ACP_c + h2o_c --> ACP_c + C150_c + h_c	3.1.2.14	240.666	0		R557_num1	0	C150ACP_c + h2o_c --> ACP_c + C150_c + h_c	3.1.2.14	240.666	0		R557_num1	0	C150ACP_c + h2o_c --> ACP_c + C150_c + h_c	3.1.2.14	240.666	0		R557_num1
R558_num1	0	C160ACP_c + h2o_c --> ACP_c + h_c + hdca_c	2.3.1.85,3.1.2.14	240.666	0		R558_num1	0	C160ACP_c + h2o_c --> ACP_c + h_c + hdca_c	2.3.1.85,3.1.2.14	240.666	0		R558_num1	0	C160ACP_c + h2o_c --> ACP_c + h_c + hdca_c	2.3.1.85,3.1.2.14	240.666	0		R558_num1	0	C160ACP_c + h2o_c --> ACP_c + h_c + hdca_c	2.3.1.85,3.1.2.14	240.666	0		R558_num1	0	C160ACP_c + h2o_c --> ACP_c + h_c + hdca_c	2.3.1.85,3.1.2.14	240.666	0		R558_num1	0	C160ACP_c + h2o_c --> ACP_c + h_c + hdca_c	2.3.1.85,3.1.2.14	240.666	0		R558_num1	0	C160ACP_c + h2o_c --> ACP_c + h_c + hdca_c	2.3.1.85,3.1.2.14	240.666	0		R558_num1
R559_num1	1.13647e-18	C161ACP_c + h2o_c --> ACP_c + C161_c + h_c	3.1.2.14	240.666	4.72217e-21		R559_num1	0	C161ACP_c + h2o_c --> ACP_c + C161_c + h_c	3.1.2.14	240.666	0		R559_num1	0	C161ACP_c + h2o_c --> ACP_c + C161_c + h_c	3.1.2.14	240.666	0		R559_num1	0	C161ACP_c + h2o_c --> ACP_c + C161_c + h_c	3.1.2.14	240.666	0		R559_num1	0	C161ACP_c + h2o_c --> ACP_c + C161_c + h_c	3.1.2.14	240.666	0		R559_num1	0	C161ACP_c + h2o_c --> ACP_c + C161_c + h_c	3.1.2.14	240.666	0		R559_num1	0	C161ACP_c + h2o_c --> ACP_c + C161_c + h_c	3.1.2.14	240.666	0		R559_num1
R560_num1	0	C162ACP_c + h2o_c --> ACP_c + C162_c + h_c	3.1.2.14	240.666	0		R560_num1	0	C162ACP_c + h2o_c --> ACP_c + C162_c + h_c	3.1.2.14	240.666	0		R560_num1	0	C162ACP_c + h2o_c --> ACP_c + C162_c + h_c	3.1.2.14	240.666	0		R560_num1	0	C162ACP_c + h2o_c --> ACP_c + C162_c + h_c	3.1.2.14	240.666	0		R560_num1	0	C162ACP_c + h2o_c --> ACP_c + C162_c + h_c	3.1.2.14	240.666	0		R560_num1	0	C162ACP_c + h2o_c --> ACP_c + C162_c + h_c	3.1.2.14	240.666	0		R560_num1	0	C162ACP_c + h2o_c --> ACP_c + C162_c + h_c	3.1.2.14	240.666	0		R560_num1
R561_num1	1.39873e-18	C170ACP_c + h2o_c --> ACP_c + C170_c + h_c	3.1.2.14	240.666	5.8119e-21		R561_num1	0	C170ACP_c + h2o_c --> ACP_c + C170_c + h_c	3.1.2.14	240.666	0		R561_num1	-1.73493e-20	C170ACP_c + h2o_c --> ACP_c + C170_c + h_c	3.1.2.14	240.666	-7.20886e-23		R561_num1	0	C170ACP_c + h2o_c --> ACP_c + C170_c + h_c	3.1.2.14	240.666	0		R561_num1	0	C170ACP_c + h2o_c --> ACP_c + C170_c + h_c	3.1.2.14	240.666	0		R561_num1	0	C170ACP_c + h2o_c --> ACP_c + C170_c + h_c	3.1.2.14	240.666	0		R561_num1	0	C170ACP_c + h2o_c --> ACP_c + C170_c + h_c	3.1.2.14	240.666	0		R561_num1
R562_num1	0	C171ACP_c + h2o_c --> ACP_c + C171_c + h_c	3.1.2.14	240.666	0		R562_num1	0	C171ACP_c + h2o_c --> ACP_c + C171_c + h_c	3.1.2.14	240.666	0		R562_num1	0	C171ACP_c + h2o_c --> ACP_c + C171_c + h_c	3.1.2.14	240.666	0		R562_num1	0	C171ACP_c + h2o_c --> ACP_c + C171_c + h_c	3.1.2.14	240.666	0		R562_num1	0	C171ACP_c + h2o_c --> ACP_c + C171_c + h_c	3.1.2.14	240.666	0		R562_num1	0	C171ACP_c + h2o_c --> ACP_c + C171_c + h_c	3.1.2.14	240.666	0		R562_num1	0	C171ACP_c + h2o_c --> ACP_c + C171_c + h_c	3.1.2.14	240.666	0		R562_num1
R563_num1	0	C180ACP_c + h2o_c --> ACP_c + h_c + ocdca_c	3.1.2.14	240.666	0		R563_num1	0	C180ACP_c + h2o_c --> ACP_c + h_c + ocdca_c	3.1.2.14	240.666	0		R563_num1	0	C180ACP_c + h2o_c --> ACP_c + h_c + ocdca_c	3.1.2.14	240.666	0		R563_num1	0	C180ACP_c + h2o_c --> ACP_c + h_c + ocdca_c	3.1.2.14	240.666	0		R563_num1	0	C180ACP_c + h2o_c --> ACP_c + h_c + ocdca_c	3.1.2.14	240.666	0		R563_num1	0	C180ACP_c + h2o_c --> ACP_c + h_c + ocdca_c	3.1.2.14	240.666	0		R563_num1	0	C180ACP_c + h2o_c --> ACP_c + h_c + ocdca_c	3.1.2.14	240.666	0		R563_num1
R564_num1	0	C181ACP_c + h2o_c --> ACP_c + h_c + ocdcea_c	3.1.2.14	240.666	0		R564_num1	0	C181ACP_c + h2o_c --> ACP_c + h_c + ocdcea_c	3.1.2.14	240.666	0		R564_num1	0	C181ACP_c + h2o_c --> ACP_c + h_c + ocdcea_c	3.1.2.14	240.666	0		R564_num1	0	C181ACP_c + h2o_c --> ACP_c + h_c + ocdcea_c	3.1.2.14	240.666	0		R564_num1	0	C181ACP_c + h2o_c --> ACP_c + h_c + ocdcea_c	3.1.2.14	240.666	0		R564_num1	0	C181ACP_c + h2o_c --> ACP_c + h_c + ocdcea_c	3.1.2.14	240.666	0		R564_num1	0	C181ACP_c + h2o_c --> ACP_c + h_c + ocdcea_c	3.1.2.14	240.666	0		R564_num1
R565_num1	0	C182ACP_c + h2o_c --> ACP_c + h_c + lnlc_c	3.1.2.14	240.666	0		R565_num1	0	C182ACP_c + h2o_c --> ACP_c + h_c + lnlc_c	3.1.2.14	240.666	0		R565_num1	0	C182ACP_c + h2o_c --> ACP_c + h_c + lnlc_c	3.1.2.14	240.666	0		R565_num1	0	C182ACP_c + h2o_c --> ACP_c + h_c + lnlc_c	3.1.2.14	240.666	0		R565_num1	0	C182ACP_c + h2o_c --> ACP_c + h_c + lnlc_c	3.1.2.14	240.666	0		R565_num1	0	C182ACP_c + h2o_c --> ACP_c + h_c + lnlc_c	3.1.2.14	240.666	0		R565_num1	0	C182ACP_c + h2o_c --> ACP_c + h_c + lnlc_c	3.1.2.14	240.666	0		R565_num1
R566_num1	6.11943e-19	C183ACP_c + h2o_c --> ACP_c + h_c + lnlnca_c	3.1.2.14	240.666	2.5427e-21		R566_num1	0	C183ACP_c + h2o_c --> ACP_c + h_c + lnlnca_c	3.1.2.14	240.666	0		R566_num1	0	C183ACP_c + h2o_c --> ACP_c + h_c + lnlnca_c	3.1.2.14	240.666	0		R566_num1	0	C183ACP_c + h2o_c --> ACP_c + h_c + lnlnca_c	3.1.2.14	240.666	0		R566_num1	0	C183ACP_c + h2o_c --> ACP_c + h_c + lnlnca_c	3.1.2.14	240.666	0		R566_num1	0	C183ACP_c + h2o_c --> ACP_c + h_c + lnlnca_c	3.1.2.14	240.666	0		R566_num1	0	C183ACP_c + h2o_c --> ACP_c + h_c + lnlnca_c	3.1.2.14	240.666	0		R566_num1
R567_num1	0	C190ACP_c + h2o_c --> ACP_c + C190_c + h_c	3.1.2.14	240.666	0		R567_num1	0	C190ACP_c + h2o_c --> ACP_c + C190_c + h_c	3.1.2.14	240.666	0		R567_num1	0	C190ACP_c + h2o_c --> ACP_c + C190_c + h_c	3.1.2.14	240.666	0		R567_num1	0	C190ACP_c + h2o_c --> ACP_c + C190_c + h_c	3.1.2.14	240.666	0		R567_num1	0	C190ACP_c + h2o_c --> ACP_c + C190_c + h_c	3.1.2.14	240.666	0		R567_num1	0	C190ACP_c + h2o_c --> ACP_c + C190_c + h_c	3.1.2.14	240.666	0		R567_num1	0	C190ACP_c + h2o_c --> ACP_c + C190_c + h_c	3.1.2.14	240.666	0		R567_num1
R568_num1	0	C191ACP_c + h2o_c --> ACP_c + C191_c + h_c	3.1.2.14	240.666	0		R568_num1	0	C191ACP_c + h2o_c --> ACP_c + C191_c + h_c	3.1.2.14	240.666	0		R568_num1	0	C191ACP_c + h2o_c --> ACP_c + C191_c + h_c	3.1.2.14	240.666	0		R568_num1	0	C191ACP_c + h2o_c --> ACP_c + C191_c + h_c	3.1.2.14	240.666	0		R568_num1	0	C191ACP_c + h2o_c --> ACP_c + C191_c + h_c	3.1.2.14	240.666	0		R568_num1	0	C191ACP_c + h2o_c --> ACP_c + C191_c + h_c	3.1.2.14	240.666	0		R568_num1	0	C191ACP_c + h2o_c --> ACP_c + C191_c + h_c	3.1.2.14	240.666	0		R568_num1
R569_num1	0	C192ACP_c + h2o_c --> ACP_c + C192_c + h_c	3.1.2.14	240.666	0		R569_num1	0	C192ACP_c + h2o_c --> ACP_c + C192_c + h_c	3.1.2.14	240.666	0		R569_num1	4.06019e-20	C192ACP_c + h2o_c --> ACP_c + C192_c + h_c	3.1.2.14	240.666	1.68707e-22		R569_num1	0	C192ACP_c + h2o_c --> ACP_c + C192_c + h_c	3.1.2.14	240.666	0		R569_num1	0	C192ACP_c + h2o_c --> ACP_c + C192_c + h_c	3.1.2.14	240.666	0		R569_num1	0	C192ACP_c + h2o_c --> ACP_c + C192_c + h_c	3.1.2.14	240.666	0		R569_num1	0	C192ACP_c + h2o_c --> ACP_c + C192_c + h_c	3.1.2.14	240.666	0		R569_num1
R570_num1	3.49682e-19	C200ACP_c + h2o_c --> ACP_c + arach_c + h_c	3.1.2.14	240.666	1.45297e-21		R570_num1	0	C200ACP_c + h2o_c --> ACP_c + arach_c + h_c	3.1.2.14	240.666	0		R570_num1	-5.20478e-20	C200ACP_c + h2o_c --> ACP_c + arach_c + h_c	3.1.2.14	240.666	-2.16266e-22		R570_num1	0	C200ACP_c + h2o_c --> ACP_c + arach_c + h_c	3.1.2.14	240.666	0		R570_num1	0	C200ACP_c + h2o_c --> ACP_c + arach_c + h_c	3.1.2.14	240.666	0		R570_num1	0	C200ACP_c + h2o_c --> ACP_c + arach_c + h_c	3.1.2.14	240.666	0		R570_num1	0	C200ACP_c + h2o_c --> ACP_c + arach_c + h_c	3.1.2.14	240.666	0		R570_num1
R571_num1	0	C40ACP_c + coa_c --> ACP_c + btcoa_c	2.3.1.38	240.666	0		R571_num1	0	C40ACP_c + coa_c --> ACP_c + btcoa_c	2.3.1.38	240.666	0		R571_num1	0	C40ACP_c + coa_c --> ACP_c + btcoa_c	2.3.1.38	240.666	0		R571_num1	0	C40ACP_c + coa_c --> ACP_c + btcoa_c	2.3.1.38	240.666	0		R571_num1	2.39839e-32	C40ACP_c + coa_c --> ACP_c + btcoa_c	2.3.1.38	240.666	9.96563e-35		R571_num1	0	C40ACP_c + coa_c --> ACP_c + btcoa_c	2.3.1.38	240.666	0		R571_num1	0	C40ACP_c + coa_c --> ACP_c + btcoa_c	2.3.1.38	240.666	0		R571_num1
R572_num1	0	C60ACP_c + coa_c --> ACP_c + C60COA_c	2.3.1.38	240.666	0		R572_num1	0	C60ACP_c + coa_c --> ACP_c + C60COA_c	2.3.1.38	240.666	0		R572_num1	0	C60ACP_c + coa_c --> ACP_c + C60COA_c	2.3.1.38	240.666	0		R572_num1	0	C60ACP_c + coa_c --> ACP_c + C60COA_c	2.3.1.38	240.666	0		R572_num1	0	C60ACP_c + coa_c --> ACP_c + C60COA_c	2.3.1.38	240.666	0		R572_num1	0	C60ACP_c + coa_c --> ACP_c + C60COA_c	2.3.1.38	240.666	0		R572_num1	0	C60ACP_c + coa_c --> ACP_c + C60COA_c	2.3.1.38	240.666	0		R572_num1
R573_num1	0	C80ACP_c + coa_c --> ACP_c + occoa_c	2.3.1.38	240.666	0		R573_num1	0	C80ACP_c + coa_c --> ACP_c + occoa_c	2.3.1.38	240.666	0		R573_num1	0	C80ACP_c + coa_c --> ACP_c + occoa_c	2.3.1.38	240.666	0		R573_num1	0	C80ACP_c + coa_c --> ACP_c + occoa_c	2.3.1.38	240.666	0		R573_num1	0	C80ACP_c + coa_c --> ACP_c + occoa_c	2.3.1.38	240.666	0		R573_num1	0	C80ACP_c + coa_c --> ACP_c + occoa_c	2.3.1.38	240.666	0		R573_num1	0	C80ACP_c + coa_c --> ACP_c + occoa_c	2.3.1.38	240.666	0		R573_num1
R574_num1	0	C100ACP_c + coa_c --> ACP_c + dccoa_c	2.3.1.38	240.666	0		R574_num1	0	C100ACP_c + coa_c --> ACP_c + dccoa_c	2.3.1.38	240.666	0		R574_num1	0	C100ACP_c + coa_c --> ACP_c + dccoa_c	2.3.1.38	240.666	0		R574_num1	0	C100ACP_c + coa_c --> ACP_c + dccoa_c	2.3.1.38	240.666	0		R574_num1	0	C100ACP_c + coa_c --> ACP_c + dccoa_c	2.3.1.38	240.666	0		R574_num1	0	C100ACP_c + coa_c --> ACP_c + dccoa_c	2.3.1.38	240.666	0		R574_num1	0	C100ACP_c + coa_c --> ACP_c + dccoa_c	2.3.1.38	240.666	0		R574_num1
R575_num1	0	coa_c + dodecacp_c --> ACP_c + ddcacoa_c	2.3.1.38	240.666	0		R575_num1	0	coa_c + dodecacp_c --> ACP_c + ddcacoa_c	2.3.1.38	240.666	0		R575_num1	0	coa_c + dodecacp_c --> ACP_c + ddcacoa_c	2.3.1.38	240.666	0		R575_num1	0	coa_c + dodecacp_c --> ACP_c + ddcacoa_c	2.3.1.38	240.666	0		R575_num1	0	coa_c + dodecacp_c --> ACP_c + ddcacoa_c	2.3.1.38	240.666	0		R575_num1	0	coa_c + dodecacp_c --> ACP_c + ddcacoa_c	2.3.1.38	240.666	0		R575_num1	0	coa_c + dodecacp_c --> ACP_c + ddcacoa_c	2.3.1.38	240.666	0		R575_num1
R576_num1	0	C140ACP_c + coa_c --> ACP_c + tdcoa_c	2.3.1.38	240.666	0		R576_num1	0	C140ACP_c + coa_c --> ACP_c + tdcoa_c	2.3.1.38	240.666	0		R576_num1	0	C140ACP_c + coa_c --> ACP_c + tdcoa_c	2.3.1.38	240.666	0		R576_num1	0	C140ACP_c + coa_c --> ACP_c + tdcoa_c	2.3.1.38	240.666	0		R576_num1	0	C140ACP_c + coa_c --> ACP_c + tdcoa_c	2.3.1.38	240.666	0		R576_num1	0	C140ACP_c + coa_c --> ACP_c + tdcoa_c	2.3.1.38	240.666	0		R576_num1	0	C140ACP_c + coa_c --> ACP_c + tdcoa_c	2.3.1.38	240.666	0		R576_num1
R577_num1	0	C141ACP_c + coa_c --> ACP_c + C141COA_c	2.3.1.38	240.666	0		R577_num1	0	C141ACP_c + coa_c --> ACP_c + C141COA_c	2.3.1.38	240.666	0		R577_num1	0	C141ACP_c + coa_c --> ACP_c + C141COA_c	2.3.1.38	240.666	0		R577_num1	0	C141ACP_c + coa_c --> ACP_c + C141COA_c	2.3.1.38	240.666	0		R577_num1	0	C141ACP_c + coa_c --> ACP_c + C141COA_c	2.3.1.38	240.666	0		R577_num1	0	C141ACP_c + coa_c --> ACP_c + C141COA_c	2.3.1.38	240.666	0		R577_num1	0	C141ACP_c + coa_c --> ACP_c + C141COA_c	2.3.1.38	240.666	0		R577_num1
R578_num1	0	C150ACP_c + coa_c --> ACP_c + pentdcoa_c	2.3.1.38	240.666	0		R578_num1	0	C150ACP_c + coa_c --> ACP_c + pentdcoa_c	2.3.1.38	240.666	0		R578_num1	0	C150ACP_c + coa_c --> ACP_c + pentdcoa_c	2.3.1.38	240.666	0		R578_num1	0	C150ACP_c + coa_c --> ACP_c + pentdcoa_c	2.3.1.38	240.666	0		R578_num1	-3.04862e-31	C150ACP_c + coa_c --> ACP_c + pentdcoa_c	2.3.1.38	240.666	-1.26674e-33		R578_num1	0	C150ACP_c + coa_c --> ACP_c + pentdcoa_c	2.3.1.38	240.666	0		R578_num1	0	C150ACP_c + coa_c --> ACP_c + pentdcoa_c	2.3.1.38	240.666	0		R578_num1
R579_num1	0	C160ACP_c + coa_c --> ACP_c + pmtcoa_c	2.3.1.86,2.3.1.-				R579_num1	0	C160ACP_c + coa_c --> ACP_c + pmtcoa_c	2.3.1.86,2.3.1.-				R579_num1	-7.4076e-19	C160ACP_c + coa_c --> ACP_c + pmtcoa_c	2.3.1.86,2.3.1.-				R579_num1	0	C160ACP_c + coa_c --> ACP_c + pmtcoa_c	2.3.1.86,2.3.1.-				R579_num1	0	C160ACP_c + coa_c --> ACP_c + pmtcoa_c	2.3.1.86,2.3.1.-				R579_num1	0	C160ACP_c + coa_c --> ACP_c + pmtcoa_c	2.3.1.86,2.3.1.-				R579_num1	0	C160ACP_c + coa_c --> ACP_c + pmtcoa_c	2.3.1.86,2.3.1.-				R579_num1
R580_num1	0	C161ACP_c + coa_c --> ACP_c + hdd2coa_c	2.3.1.38	240.666	0		R580_num1	0	C161ACP_c + coa_c --> ACP_c + hdd2coa_c	2.3.1.38	240.666	0		R580_num1	0	C161ACP_c + coa_c --> ACP_c + hdd2coa_c	2.3.1.38	240.666	0		R580_num1	0	C161ACP_c + coa_c --> ACP_c + hdd2coa_c	2.3.1.38	240.666	0		R580_num1	0	C161ACP_c + coa_c --> ACP_c + hdd2coa_c	2.3.1.38	240.666	0		R580_num1	0	C161ACP_c + coa_c --> ACP_c + hdd2coa_c	2.3.1.38	240.666	0		R580_num1	0	C161ACP_c + coa_c --> ACP_c + hdd2coa_c	2.3.1.38	240.666	0		R580_num1
R581_num1	0	C162ACP_c + coa_c --> ACP_c + C162COA_c	2.3.1.38	240.666	0		R581_num1	0	C162ACP_c + coa_c --> ACP_c + C162COA_c	2.3.1.38	240.666	0		R581_num1	0	C162ACP_c + coa_c --> ACP_c + C162COA_c	2.3.1.38	240.666	0		R581_num1	0	C162ACP_c + coa_c --> ACP_c + C162COA_c	2.3.1.38	240.666	0		R581_num1	0	C162ACP_c + coa_c --> ACP_c + C162COA_c	2.3.1.38	240.666	0		R581_num1	0	C162ACP_c + coa_c --> ACP_c + C162COA_c	2.3.1.38	240.666	0		R581_num1	0	C162ACP_c + coa_c --> ACP_c + C162COA_c	2.3.1.38	240.666	0		R581_num1
R582_num1	0	C170ACP_c + coa_c --> ACP_c + hepdcoa_c	2.3.1.38	240.666	0		R582_num1	0	C170ACP_c + coa_c --> ACP_c + hepdcoa_c	2.3.1.38	240.666	0		R582_num1	0	C170ACP_c + coa_c --> ACP_c + hepdcoa_c	2.3.1.38	240.666	0		R582_num1	0	C170ACP_c + coa_c --> ACP_c + hepdcoa_c	2.3.1.38	240.666	0		R582_num1	0	C170ACP_c + coa_c --> ACP_c + hepdcoa_c	2.3.1.38	240.666	0		R582_num1	0	C170ACP_c + coa_c --> ACP_c + hepdcoa_c	2.3.1.38	240.666	0		R582_num1	0	C170ACP_c + coa_c --> ACP_c + hepdcoa_c	2.3.1.38	240.666	0		R582_num1
R583_num1	0	C171ACP_c + coa_c --> ACP_c + C171COA_c	2.3.1.38	240.666	0		R583_num1	0	C171ACP_c + coa_c --> ACP_c + C171COA_c	2.3.1.38	240.666	0		R583_num1	0	C171ACP_c + coa_c --> ACP_c + C171COA_c	2.3.1.38	240.666	0		R583_num1	0	C171ACP_c + coa_c --> ACP_c + C171COA_c	2.3.1.38	240.666	0		R583_num1	0	C171ACP_c + coa_c --> ACP_c + C171COA_c	2.3.1.38	240.666	0		R583_num1	0	C171ACP_c + coa_c --> ACP_c + C171COA_c	2.3.1.38	240.666	0		R583_num1	0	C171ACP_c + coa_c --> ACP_c + C171COA_c	2.3.1.38	240.666	0		R583_num1
R584_num1	0	C180ACP_c + coa_c --> ACP_c + stcoa_c	2.3.1.38	240.666	0		R584_num1	0	C180ACP_c + coa_c --> ACP_c + stcoa_c	2.3.1.38	240.666	0		R584_num1	0	C180ACP_c + coa_c --> ACP_c + stcoa_c	2.3.1.38	240.666	0		R584_num1	0	C180ACP_c + coa_c --> ACP_c + stcoa_c	2.3.1.38	240.666	0		R584_num1	0	C180ACP_c + coa_c --> ACP_c + stcoa_c	2.3.1.38	240.666	0		R584_num1	0	C180ACP_c + coa_c --> ACP_c + stcoa_c	2.3.1.38	240.666	0		R584_num1	0	C180ACP_c + coa_c --> ACP_c + stcoa_c	2.3.1.38	240.666	0		R584_num1
R585_num1	-2.90754e-15	C181ACP_c + coa_c --> ACP_c + ocdce9coa_c	2.3.1.38	240.666	-1.20812e-17		R585_num1	0	C181ACP_c + coa_c --> ACP_c + ocdce9coa_c	2.3.1.38	240.666	0		R585_num1	-6.19773e-18	C181ACP_c + coa_c --> ACP_c + ocdce9coa_c	2.3.1.38	240.666	-2.57524e-20		R585_num1	0	C181ACP_c + coa_c --> ACP_c + ocdce9coa_c	2.3.1.38	240.666	0		R585_num1	-5.16747e-17	C181ACP_c + coa_c --> ACP_c + ocdce9coa_c	2.3.1.38	240.666	-2.14716e-19		R585_num1	0	C181ACP_c + coa_c --> ACP_c + ocdce9coa_c	2.3.1.38	240.666	0		R585_num1	0	C181ACP_c + coa_c --> ACP_c + ocdce9coa_c	2.3.1.38	240.666	0		R585_num1
R586_num1	0	C182ACP_c + coa_c --> ACP_c + lnlccoa_c	2.3.1.38	240.666	0		R586_num1	0	C182ACP_c + coa_c --> ACP_c + lnlccoa_c	2.3.1.38	240.666	0		R586_num1	0	C182ACP_c + coa_c --> ACP_c + lnlccoa_c	2.3.1.38	240.666	0		R586_num1	0	C182ACP_c + coa_c --> ACP_c + lnlccoa_c	2.3.1.38	240.666	0		R586_num1	0	C182ACP_c + coa_c --> ACP_c + lnlccoa_c	2.3.1.38	240.666	0		R586_num1	0	C182ACP_c + coa_c --> ACP_c + lnlccoa_c	2.3.1.38	240.666	0		R586_num1	0	C182ACP_c + coa_c --> ACP_c + lnlccoa_c	2.3.1.38	240.666	0		R586_num1
R587_num1	0	C183ACP_c + coa_c --> ACP_c + lnlncacoa_c	2.3.1.38	240.666	0		R587_num1	0	C183ACP_c + coa_c --> ACP_c + lnlncacoa_c	2.3.1.38	240.666	0		R587_num1	0	C183ACP_c + coa_c --> ACP_c + lnlncacoa_c	2.3.1.38	240.666	0		R587_num1	0	C183ACP_c + coa_c --> ACP_c + lnlncacoa_c	2.3.1.38	240.666	0		R587_num1	0	C183ACP_c + coa_c --> ACP_c + lnlncacoa_c	2.3.1.38	240.666	0		R587_num1	0	C183ACP_c + coa_c --> ACP_c + lnlncacoa_c	2.3.1.38	240.666	0		R587_num1	0	C183ACP_c + coa_c --> ACP_c + lnlncacoa_c	2.3.1.38	240.666	0		R587_num1
R588_num1	0	C190ACP_c + coa_c --> ACP_c + C190COA_c	2.3.1.38	240.666	0		R588_num1	0	C190ACP_c + coa_c --> ACP_c + C190COA_c	2.3.1.38	240.666	0		R588_num1	0	C190ACP_c + coa_c --> ACP_c + C190COA_c	2.3.1.38	240.666	0		R588_num1	0	C190ACP_c + coa_c --> ACP_c + C190COA_c	2.3.1.38	240.666	0		R588_num1	0	C190ACP_c + coa_c --> ACP_c + C190COA_c	2.3.1.38	240.666	0		R588_num1	0	C190ACP_c + coa_c --> ACP_c + C190COA_c	2.3.1.38	240.666	0		R588_num1	0	C190ACP_c + coa_c --> ACP_c + C190COA_c	2.3.1.38	240.666	0		R588_num1
R589_num1	0	C191ACP_c + coa_c --> ACP_c + C191COA_c	2.3.1.38	240.666	0		R589_num1	0	C191ACP_c + coa_c --> ACP_c + C191COA_c	2.3.1.38	240.666	0		R589_num1	0	C191ACP_c + coa_c --> ACP_c + C191COA_c	2.3.1.38	240.666	0		R589_num1	0	C191ACP_c + coa_c --> ACP_c + C191COA_c	2.3.1.38	240.666	0		R589_num1	0	C191ACP_c + coa_c --> ACP_c + C191COA_c	2.3.1.38	240.666	0		R589_num1	0	C191ACP_c + coa_c --> ACP_c + C191COA_c	2.3.1.38	240.666	0		R589_num1	0	C191ACP_c + coa_c --> ACP_c + C191COA_c	2.3.1.38	240.666	0		R589_num1
R590_num1	0	C192ACP_c + coa_c --> ACP_c + C192COA_c	2.3.1.38	240.666	0		R590_num1	0	C192ACP_c + coa_c --> ACP_c + C192COA_c	2.3.1.38	240.666	0		R590_num1	0	C192ACP_c + coa_c --> ACP_c + C192COA_c	2.3.1.38	240.666	0		R590_num1	0	C192ACP_c + coa_c --> ACP_c + C192COA_c	2.3.1.38	240.666	0		R590_num1	0	C192ACP_c + coa_c --> ACP_c + C192COA_c	2.3.1.38	240.666	0		R590_num1	0	C192ACP_c + coa_c --> ACP_c + C192COA_c	2.3.1.38	240.666	0		R590_num1	0	C192ACP_c + coa_c --> ACP_c + C192COA_c	2.3.1.38	240.666	0		R590_num1
R591_num1	0	C200ACP_c + coa_c --> ACP_c + C200COA_c	2.3.1.38	240.666	0		R591_num1	0	C200ACP_c + coa_c --> ACP_c + C200COA_c	2.3.1.38	240.666	0		R591_num1	0	C200ACP_c + coa_c --> ACP_c + C200COA_c	2.3.1.38	240.666	0		R591_num1	0	C200ACP_c + coa_c --> ACP_c + C200COA_c	2.3.1.38	240.666	0		R591_num1	0	C200ACP_c + coa_c --> ACP_c + C200COA_c	2.3.1.38	240.666	0		R591_num1	0	C200ACP_c + coa_c --> ACP_c + C200COA_c	2.3.1.38	240.666	0		R591_num1	0	C200ACP_c + coa_c --> ACP_c + C200COA_c	2.3.1.38	240.666	0		R591_num1
R592_num1	0	C40_c + atp_c + coa_c --> amp_c + btcoa_c + ppi_c	6.2.1.3	219.167	0		R592_num1	0	C40_c + atp_c + coa_c --> amp_c + btcoa_c + ppi_c	6.2.1.3	219.167	0		R592_num1	0	C40_c + atp_c + coa_c --> amp_c + btcoa_c + ppi_c	6.2.1.3	219.167	0		R592_num1	0	C40_c + atp_c + coa_c --> amp_c + btcoa_c + ppi_c	6.2.1.3	219.167	0		R592_num1	0	C40_c + atp_c + coa_c --> amp_c + btcoa_c + ppi_c	6.2.1.3	219.167	0		R592_num1	0	C40_c + atp_c + coa_c --> amp_c + btcoa_c + ppi_c	6.2.1.3	219.167	0		R592_num1	0	C40_c + atp_c + coa_c --> amp_c + btcoa_c + ppi_c	6.2.1.3	219.167	0		R592_num1
R593_num1	0	atp_c + coa_c + hxa_c --> C60COA_c + amp_c + ppi_c	6.2.1.3	219.167	0		R593_num1	0	atp_c + coa_c + hxa_c --> C60COA_c + amp_c + ppi_c	6.2.1.3	219.167	0		R593_num1	0	atp_c + coa_c + hxa_c --> C60COA_c + amp_c + ppi_c	6.2.1.3	219.167	0		R593_num1	0	atp_c + coa_c + hxa_c --> C60COA_c + amp_c + ppi_c	6.2.1.3	219.167	0		R593_num1	0	atp_c + coa_c + hxa_c --> C60COA_c + amp_c + ppi_c	6.2.1.3	219.167	0		R593_num1	0	atp_c + coa_c + hxa_c --> C60COA_c + amp_c + ppi_c	6.2.1.3	219.167	0		R593_num1	0	atp_c + coa_c + hxa_c --> C60COA_c + amp_c + ppi_c	6.2.1.3	219.167	0		R593_num1
R594_num1	0	atp_c + coa_c + octa_c --> amp_c + occoa_c + ppi_c	6.2.1.3	50.966	0		R594_num1	0	atp_c + coa_c + octa_c --> amp_c + occoa_c + ppi_c	6.2.1.3	50.966	0		R594_num1	0	atp_c + coa_c + octa_c --> amp_c + occoa_c + ppi_c	6.2.1.3	50.966	0		R594_num1	0	atp_c + coa_c + octa_c --> amp_c + occoa_c + ppi_c	6.2.1.3	50.966	0		R594_num1	0	atp_c + coa_c + octa_c --> amp_c + occoa_c + ppi_c	6.2.1.3	50.966	0		R594_num1	0	atp_c + coa_c + octa_c --> amp_c + occoa_c + ppi_c	6.2.1.3	50.966	0		R594_num1	0	atp_c + coa_c + octa_c --> amp_c + occoa_c + ppi_c	6.2.1.3	50.966	0		R594_num1
R595_num1	0	C100_c + atp_c + coa_c --> amp_c + dccoa_c + ppi_c	6.2.1.3	219.167	0		R595_num1	0	C100_c + atp_c + coa_c --> amp_c + dccoa_c + ppi_c	6.2.1.3	219.167	0		R595_num1	0	C100_c + atp_c + coa_c --> amp_c + dccoa_c + ppi_c	6.2.1.3	219.167	0		R595_num1	0	C100_c + atp_c + coa_c --> amp_c + dccoa_c + ppi_c	6.2.1.3	219.167	0		R595_num1	0	C100_c + atp_c + coa_c --> amp_c + dccoa_c + ppi_c	6.2.1.3	219.167	0		R595_num1	0	C100_c + atp_c + coa_c --> amp_c + dccoa_c + ppi_c	6.2.1.3	219.167	0		R595_num1	0	C100_c + atp_c + coa_c --> amp_c + dccoa_c + ppi_c	6.2.1.3	219.167	0		R595_num1
R596_num1	0	C120_c + atp_c + coa_c --> amp_c + ddcacoa_c + ppi_c	6.2.1.3	219.167	0		R596_num1	0	C120_c + atp_c + coa_c --> amp_c + ddcacoa_c + ppi_c	6.2.1.3	219.167	0		R596_num1	0	C120_c + atp_c + coa_c --> amp_c + ddcacoa_c + ppi_c	6.2.1.3	219.167	0		R596_num1	0	C120_c + atp_c + coa_c --> amp_c + ddcacoa_c + ppi_c	6.2.1.3	219.167	0		R596_num1	0	C120_c + atp_c + coa_c --> amp_c + ddcacoa_c + ppi_c	6.2.1.3	219.167	0		R596_num1	0	C120_c + atp_c + coa_c --> amp_c + ddcacoa_c + ppi_c	6.2.1.3	219.167	0		R596_num1	0	C120_c + atp_c + coa_c --> amp_c + ddcacoa_c + ppi_c	6.2.1.3	219.167	0		R596_num1
R597_num1	0	C140_c + atp_c + coa_c --> amp_c + ppi_c + tdcoa_c	6.2.1.3	219.167	0		R597_num1	0	C140_c + atp_c + coa_c --> amp_c + ppi_c + tdcoa_c	6.2.1.3	219.167	0		R597_num1	0	C140_c + atp_c + coa_c --> amp_c + ppi_c + tdcoa_c	6.2.1.3	219.167	0		R597_num1	0	C140_c + atp_c + coa_c --> amp_c + ppi_c + tdcoa_c	6.2.1.3	219.167	0		R597_num1	0	C140_c + atp_c + coa_c --> amp_c + ppi_c + tdcoa_c	6.2.1.3	219.167	0		R597_num1	0	C140_c + atp_c + coa_c --> amp_c + ppi_c + tdcoa_c	6.2.1.3	219.167	0		R597_num1	0	C140_c + atp_c + coa_c --> amp_c + ppi_c + tdcoa_c	6.2.1.3	219.167	0		R597_num1
R598_num1	0	C141_c + atp_c + coa_c --> C141COA_c + amp_c + ppi_c	6.2.1.3	219.167	0		R598_num1	0	C141_c + atp_c + coa_c --> C141COA_c + amp_c + ppi_c	6.2.1.3	219.167	0		R598_num1	0	C141_c + atp_c + coa_c --> C141COA_c + amp_c + ppi_c	6.2.1.3	219.167	0		R598_num1	0	C141_c + atp_c + coa_c --> C141COA_c + amp_c + ppi_c	6.2.1.3	219.167	0		R598_num1	0	C141_c + atp_c + coa_c --> C141COA_c + amp_c + ppi_c	6.2.1.3	219.167	0		R598_num1	0	C141_c + atp_c + coa_c --> C141COA_c + amp_c + ppi_c	6.2.1.3	219.167	0		R598_num1	0	C141_c + atp_c + coa_c --> C141COA_c + amp_c + ppi_c	6.2.1.3	219.167	0		R598_num1
R599_num1	0	C150_c + atp_c + coa_c --> amp_c + pentdcoa_c + ppi_c	6.2.1.3	219.167	0		R599_num1	0	C150_c + atp_c + coa_c --> amp_c + pentdcoa_c + ppi_c	6.2.1.3	219.167	0		R599_num1	0	C150_c + atp_c + coa_c --> amp_c + pentdcoa_c + ppi_c	6.2.1.3	219.167	0		R599_num1	0	C150_c + atp_c + coa_c --> amp_c + pentdcoa_c + ppi_c	6.2.1.3	219.167	0		R599_num1	0	C150_c + atp_c + coa_c --> amp_c + pentdcoa_c + ppi_c	6.2.1.3	219.167	0		R599_num1	0	C150_c + atp_c + coa_c --> amp_c + pentdcoa_c + ppi_c	6.2.1.3	219.167	0		R599_num1	0	C150_c + atp_c + coa_c --> amp_c + pentdcoa_c + ppi_c	6.2.1.3	219.167	0		R599_num1
R600_num1	0	C161_c + atp_c + coa_c --> amp_c + hdd2coa_c + ppi_c	6.2.1.3	219.167	0		R600_num1	0	C161_c + atp_c + coa_c --> amp_c + hdd2coa_c + ppi_c	6.2.1.3	219.167	0		R600_num1	0	C161_c + atp_c + coa_c --> amp_c + hdd2coa_c + ppi_c	6.2.1.3	219.167	0		R600_num1	0	C161_c + atp_c + coa_c --> amp_c + hdd2coa_c + ppi_c	6.2.1.3	219.167	0		R600_num1	0	C161_c + atp_c + coa_c --> amp_c + hdd2coa_c + ppi_c	6.2.1.3	219.167	0		R600_num1	0	C161_c + atp_c + coa_c --> amp_c + hdd2coa_c + ppi_c	6.2.1.3	219.167	0		R600_num1	0	C161_c + atp_c + coa_c --> amp_c + hdd2coa_c + ppi_c	6.2.1.3	219.167	0		R600_num1
R601_num1	0	C162_c + atp_c + coa_c --> C162COA_c + amp_c + ppi_c	6.2.1.3	219.167	0		R601_num1	0	C162_c + atp_c + coa_c --> C162COA_c + amp_c + ppi_c	6.2.1.3	219.167	0		R601_num1	0	C162_c + atp_c + coa_c --> C162COA_c + amp_c + ppi_c	6.2.1.3	219.167	0		R601_num1	0	C162_c + atp_c + coa_c --> C162COA_c + amp_c + ppi_c	6.2.1.3	219.167	0		R601_num1	0	C162_c + atp_c + coa_c --> C162COA_c + amp_c + ppi_c	6.2.1.3	219.167	0		R601_num1	0	C162_c + atp_c + coa_c --> C162COA_c + amp_c + ppi_c	6.2.1.3	219.167	0		R601_num1	0	C162_c + atp_c + coa_c --> C162COA_c + amp_c + ppi_c	6.2.1.3	219.167	0		R601_num1
R602_num1	0	C170_c + atp_c + coa_c --> amp_c + hepdcoa_c + ppi_c	6.2.1.3	219.167	0		R602_num1	0	C170_c + atp_c + coa_c --> amp_c + hepdcoa_c + ppi_c	6.2.1.3	219.167	0		R602_num1	0	C170_c + atp_c + coa_c --> amp_c + hepdcoa_c + ppi_c	6.2.1.3	219.167	0		R602_num1	0	C170_c + atp_c + coa_c --> amp_c + hepdcoa_c + ppi_c	6.2.1.3	219.167	0		R602_num1	0	C170_c + atp_c + coa_c --> amp_c + hepdcoa_c + ppi_c	6.2.1.3	219.167	0		R602_num1	0	C170_c + atp_c + coa_c --> amp_c + hepdcoa_c + ppi_c	6.2.1.3	219.167	0		R602_num1	0	C170_c + atp_c + coa_c --> amp_c + hepdcoa_c + ppi_c	6.2.1.3	219.167	0		R602_num1
R603_num1	0	C171_c + atp_c + coa_c --> C171COA_c + amp_c + ppi_c	6.2.1.3	219.167	0		R603_num1	0	C171_c + atp_c + coa_c --> C171COA_c + amp_c + ppi_c	6.2.1.3	219.167	0		R603_num1	0	C171_c + atp_c + coa_c --> C171COA_c + amp_c + ppi_c	6.2.1.3	219.167	0		R603_num1	0	C171_c + atp_c + coa_c --> C171COA_c + amp_c + ppi_c	6.2.1.3	219.167	0		R603_num1	0	C171_c + atp_c + coa_c --> C171COA_c + amp_c + ppi_c	6.2.1.3	219.167	0		R603_num1	0	C171_c + atp_c + coa_c --> C171COA_c + amp_c + ppi_c	6.2.1.3	219.167	0		R603_num1	0	C171_c + atp_c + coa_c --> C171COA_c + amp_c + ppi_c	6.2.1.3	219.167	0		R603_num1
R604_num1	0	atp_c + coa_c + ocdca_c --> amp_c + ppi_c + stcoa_c	6.2.1.3	49.4711	0		R604_num1	0	atp_c + coa_c + ocdca_c --> amp_c + ppi_c + stcoa_c	6.2.1.3	49.4711	0		R604_num1	0	atp_c + coa_c + ocdca_c --> amp_c + ppi_c + stcoa_c	6.2.1.3	49.4711	0		R604_num1	0	atp_c + coa_c + ocdca_c --> amp_c + ppi_c + stcoa_c	6.2.1.3	49.4711	0		R604_num1	0	atp_c + coa_c + ocdca_c --> amp_c + ppi_c + stcoa_c	6.2.1.3	49.4711	0		R604_num1	0	atp_c + coa_c + ocdca_c --> amp_c + ppi_c + stcoa_c	6.2.1.3	49.4711	0		R604_num1	0	atp_c + coa_c + ocdca_c --> amp_c + ppi_c + stcoa_c	6.2.1.3	49.4711	0		R604_num1
R605_num1	0	atp_c + coa_c + ocdcea_c --> amp_c + ocdce9coa_c + ppi_c	6.2.1.3	50.966	0		R605_num1	0	atp_c + coa_c + ocdcea_c --> amp_c + ocdce9coa_c + ppi_c	6.2.1.3	50.966	0		R605_num1	0	atp_c + coa_c + ocdcea_c --> amp_c + ocdce9coa_c + ppi_c	6.2.1.3	50.966	0		R605_num1	0	atp_c + coa_c + ocdcea_c --> amp_c + ocdce9coa_c + ppi_c	6.2.1.3	50.966	0		R605_num1	0	atp_c + coa_c + ocdcea_c --> amp_c + ocdce9coa_c + ppi_c	6.2.1.3	50.966	0		R605_num1	0	atp_c + coa_c + ocdcea_c --> amp_c + ocdce9coa_c + ppi_c	6.2.1.3	50.966	0		R605_num1	0	atp_c + coa_c + ocdcea_c --> amp_c + ocdce9coa_c + ppi_c	6.2.1.3	50.966	0		R605_num1
R606_num1	0	atp_c + coa_c + lnlc_c --> amp_c + lnlccoa_c + ppi_c	6.2.1.3	50.966	0		R606_num1	0	atp_c + coa_c + lnlc_c --> amp_c + lnlccoa_c + ppi_c	6.2.1.3	50.966	0		R606_num1	0	atp_c + coa_c + lnlc_c --> amp_c + lnlccoa_c + ppi_c	6.2.1.3	50.966	0		R606_num1	0	atp_c + coa_c + lnlc_c --> amp_c + lnlccoa_c + ppi_c	6.2.1.3	50.966	0		R606_num1	0	atp_c + coa_c + lnlc_c --> amp_c + lnlccoa_c + ppi_c	6.2.1.3	50.966	0		R606_num1	0	atp_c + coa_c + lnlc_c --> amp_c + lnlccoa_c + ppi_c	6.2.1.3	50.966	0		R606_num1	0	atp_c + coa_c + lnlc_c --> amp_c + lnlccoa_c + ppi_c	6.2.1.3	50.966	0		R606_num1
R607_num1	0	atp_c + coa_c + lnlnca_c --> amp_c + lnlncacoa_c + ppi_c	6.2.1.3	48.0202	0		R607_num1	0	atp_c + coa_c + lnlnca_c --> amp_c + lnlncacoa_c + ppi_c	6.2.1.3	48.0202	0		R607_num1	0	atp_c + coa_c + lnlnca_c --> amp_c + lnlncacoa_c + ppi_c	6.2.1.3	48.0202	0		R607_num1	0	atp_c + coa_c + lnlnca_c --> amp_c + lnlncacoa_c + ppi_c	6.2.1.3	48.0202	0		R607_num1	0	atp_c + coa_c + lnlnca_c --> amp_c + lnlncacoa_c + ppi_c	6.2.1.3	48.0202	0		R607_num1	0	atp_c + coa_c + lnlnca_c --> amp_c + lnlncacoa_c + ppi_c	6.2.1.3	48.0202	0		R607_num1	0	atp_c + coa_c + lnlnca_c --> amp_c + lnlncacoa_c + ppi_c	6.2.1.3	48.0202	0		R607_num1
R608_num1	0	C190_c + atp_c + coa_c --> C190COA_c + amp_c + ppi_c	6.2.1.3	219.167	0		R608_num1	0	C190_c + atp_c + coa_c --> C190COA_c + amp_c + ppi_c	6.2.1.3	219.167	0		R608_num1	0	C190_c + atp_c + coa_c --> C190COA_c + amp_c + ppi_c	6.2.1.3	219.167	0		R608_num1	0	C190_c + atp_c + coa_c --> C190COA_c + amp_c + ppi_c	6.2.1.3	219.167	0		R608_num1	0	C190_c + atp_c + coa_c --> C190COA_c + amp_c + ppi_c	6.2.1.3	219.167	0		R608_num1	0	C190_c + atp_c + coa_c --> C190COA_c + amp_c + ppi_c	6.2.1.3	219.167	0		R608_num1	0	C190_c + atp_c + coa_c --> C190COA_c + amp_c + ppi_c	6.2.1.3	219.167	0		R608_num1
R609_num1	0	C191_c + atp_c + coa_c --> C191COA_c + amp_c + ppi_c	6.2.1.3	219.167	0		R609_num1	0	C191_c + atp_c + coa_c --> C191COA_c + amp_c + ppi_c	6.2.1.3	219.167	0		R609_num1	0	C191_c + atp_c + coa_c --> C191COA_c + amp_c + ppi_c	6.2.1.3	219.167	0		R609_num1	0	C191_c + atp_c + coa_c --> C191COA_c + amp_c + ppi_c	6.2.1.3	219.167	0		R609_num1	0	C191_c + atp_c + coa_c --> C191COA_c + amp_c + ppi_c	6.2.1.3	219.167	0		R609_num1	0	C191_c + atp_c + coa_c --> C191COA_c + amp_c + ppi_c	6.2.1.3	219.167	0		R609_num1	0	C191_c + atp_c + coa_c --> C191COA_c + amp_c + ppi_c	6.2.1.3	219.167	0		R609_num1
R610_num1	0	C192_c + atp_c + coa_c --> C192COA_c + amp_c + ppi_c	6.2.1.3	219.167	0		R610_num1	0	C192_c + atp_c + coa_c --> C192COA_c + amp_c + ppi_c	6.2.1.3	219.167	0		R610_num1	0	C192_c + atp_c + coa_c --> C192COA_c + amp_c + ppi_c	6.2.1.3	219.167	0		R610_num1	0	C192_c + atp_c + coa_c --> C192COA_c + amp_c + ppi_c	6.2.1.3	219.167	0		R610_num1	0	C192_c + atp_c + coa_c --> C192COA_c + amp_c + ppi_c	6.2.1.3	219.167	0		R610_num1	0	C192_c + atp_c + coa_c --> C192COA_c + amp_c + ppi_c	6.2.1.3	219.167	0		R610_num1	0	C192_c + atp_c + coa_c --> C192COA_c + amp_c + ppi_c	6.2.1.3	219.167	0		R610_num1
R611_num1	0	arach_c + atp_c + coa_c --> C200COA_c + amp_c + ppi_c	6.2.1.3	219.167	0		R611_num1	0	arach_c + atp_c + coa_c --> C200COA_c + amp_c + ppi_c	6.2.1.3	219.167	0		R611_num1	0	arach_c + atp_c + coa_c --> C200COA_c + amp_c + ppi_c	6.2.1.3	219.167	0		R611_num1	0	arach_c + atp_c + coa_c --> C200COA_c + amp_c + ppi_c	6.2.1.3	219.167	0		R611_num1	0	arach_c + atp_c + coa_c --> C200COA_c + amp_c + ppi_c	6.2.1.3	219.167	0		R611_num1	0	arach_c + atp_c + coa_c --> C200COA_c + amp_c + ppi_c	6.2.1.3	219.167	0		R611_num1	0	arach_c + atp_c + coa_c --> C200COA_c + amp_c + ppi_c	6.2.1.3	219.167	0		R611_num1
R612_num1	0	btcoa_m + fad_m + 5.0 h_m --> C4DCOA_m + fadh2_m	1.3.99.3				R612_num1	0	btcoa_m + fad_m + 5.0 h_m --> C4DCOA_m + fadh2_m	1.3.99.3				R612_num1	0	btcoa_m + fad_m + 5.0 h_m --> C4DCOA_m + fadh2_m	1.3.99.3				R612_num1	0	btcoa_m + fad_m + 5.0 h_m --> C4DCOA_m + fadh2_m	1.3.99.3				R612_num1	0	btcoa_m + fad_m + 5.0 h_m --> C4DCOA_m + fadh2_m	1.3.99.3				R612_num1	0	btcoa_m + fad_m + 5.0 h_m --> C4DCOA_m + fadh2_m	1.3.99.3				R612_num1	0	btcoa_m + fad_m + 5.0 h_m --> C4DCOA_m + fadh2_m	1.3.99.3				R612_num1
R613_num1	-2.49983e-15	aacoa_m + coa_m --> 2.0 accoa_m	2.3.1.9	139.032	-1.79803e-17		R613_num1	0	aacoa_m + coa_m --> 2.0 accoa_m	2.3.1.9	139.032	0		R613_num1	-4.12423e-17	aacoa_m + coa_m --> 2.0 accoa_m	2.3.1.9	139.032	-2.9664e-19		R613_num1	2.12554e-15	aacoa_m + coa_m --> 2.0 accoa_m	2.3.1.9	139.032	1.52881e-17		R613_num1	-5.16747e-17	aacoa_m + coa_m --> 2.0 accoa_m	2.3.1.9	139.032	-3.71676e-19		R613_num1	0	aacoa_m + coa_m --> 2.0 accoa_m	2.3.1.9	139.032	0		R613_num1	0	aacoa_m + coa_m --> 2.0 accoa_m	2.3.1.9	139.032	0		R613_num1
R614	0	PE_c + amet_c --> C01241_c + ahcys_c + h_c	2.1.1.17				R614	0	PE_c + amet_c --> C01241_c + ahcys_c + h_c	2.1.1.17				R614	-4.15962e-18	PE_c + amet_c --> C01241_c + ahcys_c + h_c	2.1.1.17				R614	0	PE_c + amet_c --> C01241_c + ahcys_c + h_c	2.1.1.17				R614	-2.32536e-16	PE_c + amet_c --> C01241_c + ahcys_c + h_c	2.1.1.17				R614	0	PE_c + amet_c --> C01241_c + ahcys_c + h_c	2.1.1.17				R614	0	PE_c + amet_c --> C01241_c + ahcys_c + h_c	2.1.1.17				R614
R615	-2.91401e-17	C01241_c + amet_c --> C04308_c + ahcys_c + h_c	2.1.1.71				R615	0	C01241_c + amet_c --> C04308_c + ahcys_c + h_c	2.1.1.71				R615	-3.03198e-19	C01241_c + amet_c --> C04308_c + ahcys_c + h_c	2.1.1.71				R615	-2.83405e-15	C01241_c + amet_c --> C04308_c + ahcys_c + h_c	2.1.1.71				R615	-2.32536e-16	C01241_c + amet_c --> C04308_c + ahcys_c + h_c	2.1.1.71				R615	0	C01241_c + amet_c --> C04308_c + ahcys_c + h_c	2.1.1.71				R615	0	C01241_c + amet_c --> C04308_c + ahcys_c + h_c	2.1.1.71				R615
R616	-2.91401e-17	C04308_c + amet_c --> ahcys_c + h_c + pcholho_c	2.1.1.71				R616	0	C04308_c + amet_c --> ahcys_c + h_c + pcholho_c	2.1.1.71				R616	-3.03198e-19	C04308_c + amet_c --> ahcys_c + h_c + pcholho_c	2.1.1.71				R616	-2.83405e-15	C04308_c + amet_c --> ahcys_c + h_c + pcholho_c	2.1.1.71				R616	-2.32536e-16	C04308_c + amet_c --> ahcys_c + h_c + pcholho_c	2.1.1.71				R616	0	C04308_c + amet_c --> ahcys_c + h_c + pcholho_c	2.1.1.71				R616	0	C04308_c + amet_c --> ahcys_c + h_c + pcholho_c	2.1.1.71				R616
R617	0	MIPC_c + gdpmann_c --> DMIPC_c + gdp_c + h_c					R617	0	MIPC_c + gdpmann_c --> DMIPC_c + gdp_c + h_c					R617	-3.23101e-21	MIPC_c + gdpmann_c --> DMIPC_c + gdp_c + h_c					R617	0	MIPC_c + gdpmann_c --> DMIPC_c + gdp_c + h_c					R617	0	MIPC_c + gdpmann_c --> DMIPC_c + gdp_c + h_c					R617	0	MIPC_c + gdpmann_c --> DMIPC_c + gdp_c + h_c					R617	0	MIPC_c + gdpmann_c --> DMIPC_c + gdp_c + h_c					R617
R618	-6.40796e-16	atp_c + coa_c + malon_c --> amp_c + malcoa_c + ppi_c	6.2.1.-				R618	0	atp_c + coa_c + malon_c --> amp_c + malcoa_c + ppi_c	6.2.1.-				R618	0	atp_c + coa_c + malon_c --> amp_c + malcoa_c + ppi_c	6.2.1.-				R618	2.26724e-14	atp_c + coa_c + malon_c --> amp_c + malcoa_c + ppi_c	6.2.1.-				R618	0	atp_c + coa_c + malon_c --> amp_c + malcoa_c + ppi_c	6.2.1.-				R618	1.4803e-16	atp_c + coa_c + malon_c --> amp_c + malcoa_c + ppi_c	6.2.1.-				R618	0	atp_c + coa_c + malon_c --> amp_c + malcoa_c + ppi_c	6.2.1.-				R618
R619_num1	0	accoa_c + carP_c --> BCCP_c + malcoa_c	6.4.1.2	556.812	0		R619_num1	0	accoa_c + carP_c --> BCCP_c + malcoa_c	6.4.1.2	556.812	0		R619_num1	1.63538e-16	accoa_c + carP_c --> BCCP_c + malcoa_c	6.4.1.2	556.812	2.93704e-19		R619_num1	0	accoa_c + carP_c --> BCCP_c + malcoa_c	6.4.1.2	556.812	0		R619_num1	0	accoa_c + carP_c --> BCCP_c + malcoa_c	6.4.1.2	556.812	0		R619_num1	0	accoa_c + carP_c --> BCCP_c + malcoa_c	6.4.1.2	556.812	0		R619_num1	0	accoa_c + carP_c --> BCCP_c + malcoa_c	6.4.1.2	556.812	0		R619_num1
R620_num1	0	C60COA_m + fad_m + h_m --> fadh2_m + hx2coa_m	1.3.99.13,1.3.99.3				R620_num1	0	C60COA_m + fad_m + h_m --> fadh2_m + hx2coa_m	1.3.99.13,1.3.99.3				R620_num1	0	C60COA_m + fad_m + h_m --> fadh2_m + hx2coa_m	1.3.99.13,1.3.99.3				R620_num1	0	C60COA_m + fad_m + h_m --> fadh2_m + hx2coa_m	1.3.99.13,1.3.99.3				R620_num1	0	C60COA_m + fad_m + h_m --> fadh2_m + hx2coa_m	1.3.99.13,1.3.99.3				R620_num1	0	C60COA_m + fad_m + h_m --> fadh2_m + hx2coa_m	1.3.99.13,1.3.99.3				R620_num1	0	C60COA_m + fad_m + h_m --> fadh2_m + hx2coa_m	1.3.99.13,1.3.99.3				R620_num1
R621_num1	0	atp_c + coa_c + hdca_c --> amp_c + pmtcoa_c + ppi_c	6.2.1.3	49.4711	0		R621_num1	0	atp_c + coa_c + hdca_c --> amp_c + pmtcoa_c + ppi_c	6.2.1.3	49.4711	0		R621_num1	0	atp_c + coa_c + hdca_c --> amp_c + pmtcoa_c + ppi_c	6.2.1.3	49.4711	0		R621_num1	0	atp_c + coa_c + hdca_c --> amp_c + pmtcoa_c + ppi_c	6.2.1.3	49.4711	0		R621_num1	0	atp_c + coa_c + hdca_c --> amp_c + pmtcoa_c + ppi_c	6.2.1.3	49.4711	0		R621_num1	0	atp_c + coa_c + hdca_c --> amp_c + pmtcoa_c + ppi_c	6.2.1.3	49.4711	0		R621_num1	0	atp_c + coa_c + hdca_c --> amp_c + pmtcoa_c + ppi_c	6.2.1.3	49.4711	0		R621_num1
R622_num1	2.91401e-19	dodecacp_c + h2o_c --> ACP_c + C120_c + h_c	3.1.2.14,3.1.2.21	240.666	1.21081e-21		R622_num1	0	dodecacp_c + h2o_c --> ACP_c + C120_c + h_c	3.1.2.14,3.1.2.21	240.666	0		R622_num1	0	dodecacp_c + h2o_c --> ACP_c + C120_c + h_c	3.1.2.14,3.1.2.21	240.666	0		R622_num1	0	dodecacp_c + h2o_c --> ACP_c + C120_c + h_c	3.1.2.14,3.1.2.21	240.666	0		R622_num1	0	dodecacp_c + h2o_c --> ACP_c + C120_c + h_c	3.1.2.14,3.1.2.21	240.666	0		R622_num1	0	dodecacp_c + h2o_c --> ACP_c + C120_c + h_c	3.1.2.14,3.1.2.21	240.666	0		R622_num1	0	dodecacp_c + h2o_c --> ACP_c + C120_c + h_c	3.1.2.14,3.1.2.21	240.666	0		R622_num1
R623_num1	0	fad_x + h_x + pmtcoa_x --> fadh2_x + hdd2coa_x	1.3.3.6,1.3.8.7,1.3.8.8,1.3.8.9	265.576	0		R623_num1	0	fad_x + h_x + pmtcoa_x --> fadh2_x + hdd2coa_x	1.3.3.6,1.3.8.7,1.3.8.8,1.3.8.9	265.576	0		R623_num1	0	fad_x + h_x + pmtcoa_x --> fadh2_x + hdd2coa_x	1.3.3.6,1.3.8.7,1.3.8.8,1.3.8.9	265.576	0		R623_num1	0	fad_x + h_x + pmtcoa_x --> fadh2_x + hdd2coa_x	1.3.3.6,1.3.8.7,1.3.8.8,1.3.8.9	265.576	0		R623_num1	0	fad_x + h_x + pmtcoa_x --> fadh2_x + hdd2coa_x	1.3.3.6,1.3.8.7,1.3.8.8,1.3.8.9	265.576	0		R623_num1	0	fad_x + h_x + pmtcoa_x --> fadh2_x + hdd2coa_x	1.3.3.6,1.3.8.7,1.3.8.8,1.3.8.9	265.576	0		R623_num1	0	fad_x + h_x + pmtcoa_x --> fadh2_x + hdd2coa_x	1.3.3.6,1.3.8.7,1.3.8.8,1.3.8.9	265.576	0		R623_num1
R624_num1	0	fad_x + h_x + tdcoa_x --> fadh2_x + td2coa_x	1.3.3.6,1.3.8.7,1.3.8.8,1.3.8.9	290.385	0		R624_num1	0	fad_x + h_x + tdcoa_x --> fadh2_x + td2coa_x	1.3.3.6,1.3.8.7,1.3.8.8,1.3.8.9	290.385	0		R624_num1	0	fad_x + h_x + tdcoa_x --> fadh2_x + td2coa_x	1.3.3.6,1.3.8.7,1.3.8.8,1.3.8.9	290.385	0		R624_num1	0	fad_x + h_x + tdcoa_x --> fadh2_x + td2coa_x	1.3.3.6,1.3.8.7,1.3.8.8,1.3.8.9	290.385	0		R624_num1	0	fad_x + h_x + tdcoa_x --> fadh2_x + td2coa_x	1.3.3.6,1.3.8.7,1.3.8.8,1.3.8.9	290.385	0		R624_num1	0	fad_x + h_x + tdcoa_x --> fadh2_x + td2coa_x	1.3.3.6,1.3.8.7,1.3.8.8,1.3.8.9	290.385	0		R624_num1	0	fad_x + h_x + tdcoa_x --> fadh2_x + td2coa_x	1.3.3.6,1.3.8.7,1.3.8.8,1.3.8.9	290.385	0		R624_num1
R625_num1	0	dodcoa_x + fad_x + h_x --> fadh2_x + trans_dd2coa_x	1.3.3.6,1.3.8.7,1.3.8.8,1.3.99.-	357.662	0		R625_num1	0	dodcoa_x + fad_x + h_x --> fadh2_x + trans_dd2coa_x	1.3.3.6,1.3.8.7,1.3.8.8,1.3.99.-	357.662	0		R625_num1	0	dodcoa_x + fad_x + h_x --> fadh2_x + trans_dd2coa_x	1.3.3.6,1.3.8.7,1.3.8.8,1.3.99.-	357.662	0		R625_num1	0	dodcoa_x + fad_x + h_x --> fadh2_x + trans_dd2coa_x	1.3.3.6,1.3.8.7,1.3.8.8,1.3.99.-	357.662	0		R625_num1	0	dodcoa_x + fad_x + h_x --> fadh2_x + trans_dd2coa_x	1.3.3.6,1.3.8.7,1.3.8.8,1.3.99.-	357.662	0		R625_num1	0	dodcoa_x + fad_x + h_x --> fadh2_x + trans_dd2coa_x	1.3.3.6,1.3.8.7,1.3.8.8,1.3.99.-	357.662	0		R625_num1	0	dodcoa_x + fad_x + h_x --> fadh2_x + trans_dd2coa_x	1.3.3.6,1.3.8.7,1.3.8.8,1.3.99.-	357.662	0		R625_num1
R626_num1	0	deccoa_x + fad_x + h_x --> dc2coa_x + fadh2_x	1.3.3.6,1.3.8.7,1.3.8.8,1.3.99.-	357.662	0		R626_num1	0	deccoa_x + fad_x + h_x --> dc2coa_x + fadh2_x	1.3.3.6,1.3.8.7,1.3.8.8,1.3.99.-	357.662	0		R626_num1	0	deccoa_x + fad_x + h_x --> dc2coa_x + fadh2_x	1.3.3.6,1.3.8.7,1.3.8.8,1.3.99.-	357.662	0		R626_num1	0	deccoa_x + fad_x + h_x --> dc2coa_x + fadh2_x	1.3.3.6,1.3.8.7,1.3.8.8,1.3.99.-	357.662	0		R626_num1	0	deccoa_x + fad_x + h_x --> dc2coa_x + fadh2_x	1.3.3.6,1.3.8.7,1.3.8.8,1.3.99.-	357.662	0		R626_num1	0	deccoa_x + fad_x + h_x --> dc2coa_x + fadh2_x	1.3.3.6,1.3.8.7,1.3.8.8,1.3.99.-	357.662	0		R626_num1	0	deccoa_x + fad_x + h_x --> dc2coa_x + fadh2_x	1.3.3.6,1.3.8.7,1.3.8.8,1.3.99.-	357.662	0		R626_num1
R627_num1	0	fad_x + h_x + octcoa_x --> fadh2_x + oc2coa_x	1.3.3.6,1.3.8.7,1.3.8.8,1.3.99.-	357.662	0		R627_num1	0	fad_x + h_x + octcoa_x --> fadh2_x + oc2coa_x	1.3.3.6,1.3.8.7,1.3.8.8,1.3.99.-	357.662	0		R627_num1	0	fad_x + h_x + octcoa_x --> fadh2_x + oc2coa_x	1.3.3.6,1.3.8.7,1.3.8.8,1.3.99.-	357.662	0		R627_num1	0	fad_x + h_x + octcoa_x --> fadh2_x + oc2coa_x	1.3.3.6,1.3.8.7,1.3.8.8,1.3.99.-	357.662	0		R627_num1	0	fad_x + h_x + octcoa_x --> fadh2_x + oc2coa_x	1.3.3.6,1.3.8.7,1.3.8.8,1.3.99.-	357.662	0		R627_num1	0	fad_x + h_x + octcoa_x --> fadh2_x + oc2coa_x	1.3.3.6,1.3.8.7,1.3.8.8,1.3.99.-	357.662	0		R627_num1	0	fad_x + h_x + octcoa_x --> fadh2_x + oc2coa_x	1.3.3.6,1.3.8.7,1.3.8.8,1.3.99.-	357.662	0		R627_num1
R628_num1	0	C60COA_x + fad_x + h_x --> fadh2_x + hx2coa_x	1.3.3.6,1.3.8.1,1.3.8.7,1.3.8.8	357.662	0		R628_num1	0	C60COA_x + fad_x + h_x --> fadh2_x + hx2coa_x	1.3.3.6,1.3.8.1,1.3.8.7,1.3.8.8	357.662	0		R628_num1	0	C60COA_x + fad_x + h_x --> fadh2_x + hx2coa_x	1.3.3.6,1.3.8.1,1.3.8.7,1.3.8.8	357.662	0		R628_num1	0	C60COA_x + fad_x + h_x --> fadh2_x + hx2coa_x	1.3.3.6,1.3.8.1,1.3.8.7,1.3.8.8	357.662	0		R628_num1	0	C60COA_x + fad_x + h_x --> fadh2_x + hx2coa_x	1.3.3.6,1.3.8.1,1.3.8.7,1.3.8.8	357.662	0		R628_num1	0	C60COA_x + fad_x + h_x --> fadh2_x + hx2coa_x	1.3.3.6,1.3.8.1,1.3.8.7,1.3.8.8	357.662	0		R628_num1	0	C60COA_x + fad_x + h_x --> fadh2_x + hx2coa_x	1.3.3.6,1.3.8.1,1.3.8.7,1.3.8.8	357.662	0		R628_num1
R629	0	fad_m + h_m + trdcalcoa_m --> C13DCOA_m + fadh2_m	1.3.99.13,1.3.99.3				R629	0	fad_m + h_m + trdcalcoa_m --> C13DCOA_m + fadh2_m	1.3.99.13,1.3.99.3				R629	0	fad_m + h_m + trdcalcoa_m --> C13DCOA_m + fadh2_m	1.3.99.13,1.3.99.3				R629	0	fad_m + h_m + trdcalcoa_m --> C13DCOA_m + fadh2_m	1.3.99.13,1.3.99.3				R629	0	fad_m + h_m + trdcalcoa_m --> C13DCOA_m + fadh2_m	1.3.99.13,1.3.99.3				R629	0	fad_m + h_m + trdcalcoa_m --> C13DCOA_m + fadh2_m	1.3.99.13,1.3.99.3				R629	0	fad_m + h_m + trdcalcoa_m --> C13DCOA_m + fadh2_m	1.3.99.13,1.3.99.3				R629
R630	0	fad_m + 5.0 h_m + hepdcoa_m --> C17DCOA_m + fadh2_m	1.3.99.13,1.3.99.3				R630	0	fad_m + 5.0 h_m + hepdcoa_m --> C17DCOA_m + fadh2_m	1.3.99.13,1.3.99.3				R630	0	fad_m + 5.0 h_m + hepdcoa_m --> C17DCOA_m + fadh2_m	1.3.99.13,1.3.99.3				R630	0	fad_m + 5.0 h_m + hepdcoa_m --> C17DCOA_m + fadh2_m	1.3.99.13,1.3.99.3				R630	0	fad_m + 5.0 h_m + hepdcoa_m --> C17DCOA_m + fadh2_m	1.3.99.13,1.3.99.3				R630	0	fad_m + 5.0 h_m + hepdcoa_m --> C17DCOA_m + fadh2_m	1.3.99.13,1.3.99.3				R630	0	fad_m + 5.0 h_m + hepdcoa_m --> C17DCOA_m + fadh2_m	1.3.99.13,1.3.99.3				R630
R631	0	fad_m + h_m + pmtcoa_m --> fadh2_m + hdd2coa_m	1.3.99.13,1.3.99.3				R631	0	fad_m + h_m + pmtcoa_m --> fadh2_m + hdd2coa_m	1.3.99.13,1.3.99.3				R631	0	fad_m + h_m + pmtcoa_m --> fadh2_m + hdd2coa_m	1.3.99.13,1.3.99.3				R631	0	fad_m + h_m + pmtcoa_m --> fadh2_m + hdd2coa_m	1.3.99.13,1.3.99.3				R631	0	fad_m + h_m + pmtcoa_m --> fadh2_m + hdd2coa_m	1.3.99.13,1.3.99.3				R631	0	fad_m + h_m + pmtcoa_m --> fadh2_m + hdd2coa_m	1.3.99.13,1.3.99.3				R631	0	fad_m + h_m + pmtcoa_m --> fadh2_m + hdd2coa_m	1.3.99.13,1.3.99.3				R631
R632	0	ddcacoa_m + fad_m + h_m --> dd2coa_m + fadh2_m	1.3.99.13,1.3.99.3				R632	0	ddcacoa_m + fad_m + h_m --> dd2coa_m + fadh2_m	1.3.99.13,1.3.99.3				R632	0	ddcacoa_m + fad_m + h_m --> dd2coa_m + fadh2_m	1.3.99.13,1.3.99.3				R632	0	ddcacoa_m + fad_m + h_m --> dd2coa_m + fadh2_m	1.3.99.13,1.3.99.3				R632	0	ddcacoa_m + fad_m + h_m --> dd2coa_m + fadh2_m	1.3.99.13,1.3.99.3				R632	0	ddcacoa_m + fad_m + h_m --> dd2coa_m + fadh2_m	1.3.99.13,1.3.99.3				R632	0	ddcacoa_m + fad_m + h_m --> dd2coa_m + fadh2_m	1.3.99.13,1.3.99.3				R632
R633	0	fad_m + h_m + ivcoa_m --> 3mb2coa_m + fadh2_m	1.3.8.4	140.295	0		R633	0	fad_m + h_m + ivcoa_m --> 3mb2coa_m + fadh2_m	1.3.8.4	140.295	0		R633	0	fad_m + h_m + ivcoa_m --> 3mb2coa_m + fadh2_m	1.3.8.4	140.295	0		R633	0	fad_m + h_m + ivcoa_m --> 3mb2coa_m + fadh2_m	1.3.8.4	140.295	0		R633	0	fad_m + h_m + ivcoa_m --> 3mb2coa_m + fadh2_m	1.3.8.4	140.295	0		R633	0	fad_m + h_m + ivcoa_m --> 3mb2coa_m + fadh2_m	1.3.8.4	140.295	0		R633	0	fad_m + h_m + ivcoa_m --> 3mb2coa_m + fadh2_m	1.3.8.4	140.295	0		R633
R634	3.66935e-31	o2_x + stcoa_x --> h2o2_x + od2coa_x	1.3.3.6	669.672	5.47932e-34		R634	0	o2_x + stcoa_x --> h2o2_x + od2coa_x	1.3.3.6	669.672	0		R634	0	o2_x + stcoa_x --> h2o2_x + od2coa_x	1.3.3.6	669.672	0		R634	0	o2_x + stcoa_x --> h2o2_x + od2coa_x	1.3.3.6	669.672	0		R634	0	o2_x + stcoa_x --> h2o2_x + od2coa_x	1.3.3.6	669.672	0		R634	0	o2_x + stcoa_x --> h2o2_x + od2coa_x	1.3.3.6	669.672	0		R634	0	o2_x + stcoa_x --> h2o2_x + od2coa_x	1.3.3.6	669.672	0		R634
R635	0	fad_m + glutcoa_m + 2.0 h_m --> b2coa_m + co2_m + fadh2_m	1.3.8.6	401.67	0		R635	0	fad_m + glutcoa_m + 2.0 h_m --> b2coa_m + co2_m + fadh2_m	1.3.8.6	401.67	0		R635	-3.66272e-18	fad_m + glutcoa_m + 2.0 h_m --> b2coa_m + co2_m + fadh2_m	1.3.8.6	401.67	-9.11873e-21		R635	0	fad_m + glutcoa_m + 2.0 h_m --> b2coa_m + co2_m + fadh2_m	1.3.8.6	401.67	0		R635	0	fad_m + glutcoa_m + 2.0 h_m --> b2coa_m + co2_m + fadh2_m	1.3.8.6	401.67	0		R635	0	fad_m + glutcoa_m + 2.0 h_m --> b2coa_m + co2_m + fadh2_m	1.3.8.6	401.67	0		R635	0	fad_m + glutcoa_m + 2.0 h_m --> b2coa_m + co2_m + fadh2_m	1.3.8.6	401.67	0		R635
R636_num1	0	btcoa_m + fad_m + h_m --> b2coa_m + fadh2_m	1.3.3.6,1.3.8.1,1.3.8.7,1.3.99.-	357.662	0		R636_num1	0	btcoa_m + fad_m + h_m --> b2coa_m + fadh2_m	1.3.3.6,1.3.8.1,1.3.8.7,1.3.99.-	357.662	0		R636_num1	0	btcoa_m + fad_m + h_m --> b2coa_m + fadh2_m	1.3.3.6,1.3.8.1,1.3.8.7,1.3.99.-	357.662	0		R636_num1	0	btcoa_m + fad_m + h_m --> b2coa_m + fadh2_m	1.3.3.6,1.3.8.1,1.3.8.7,1.3.99.-	357.662	0		R636_num1	0	btcoa_m + fad_m + h_m --> b2coa_m + fadh2_m	1.3.3.6,1.3.8.1,1.3.8.7,1.3.99.-	357.662	0		R636_num1	0	btcoa_m + fad_m + h_m --> b2coa_m + fadh2_m	1.3.3.6,1.3.8.1,1.3.8.7,1.3.99.-	357.662	0		R636_num1	0	btcoa_m + fad_m + h_m --> b2coa_m + fadh2_m	1.3.3.6,1.3.8.1,1.3.8.7,1.3.99.-	357.662	0		R636_num1
R637_num1	0	butcoa_x + fad_x + h_x --> b2coa_x + fadh2_x	1.3.3.6,1.3.8.1,1.3.8.7,1.3.99.-	357.662	0		R637_num1	0	butcoa_x + fad_x + h_x --> b2coa_x + fadh2_x	1.3.3.6,1.3.8.1,1.3.8.7,1.3.99.-	357.662	0		R637_num1	0	butcoa_x + fad_x + h_x --> b2coa_x + fadh2_x	1.3.3.6,1.3.8.1,1.3.8.7,1.3.99.-	357.662	0		R637_num1	0	butcoa_x + fad_x + h_x --> b2coa_x + fadh2_x	1.3.3.6,1.3.8.1,1.3.8.7,1.3.99.-	357.662	0		R637_num1	0	butcoa_x + fad_x + h_x --> b2coa_x + fadh2_x	1.3.3.6,1.3.8.1,1.3.8.7,1.3.99.-	357.662	0		R637_num1	0	butcoa_x + fad_x + h_x --> b2coa_x + fadh2_x	1.3.3.6,1.3.8.1,1.3.8.7,1.3.99.-	357.662	0		R637_num1	0	butcoa_x + fad_x + h_x --> b2coa_x + fadh2_x	1.3.3.6,1.3.8.1,1.3.8.7,1.3.99.-	357.662	0		R637_num1
R638_num1	0	b2coa_m + h2o_m --> 3hbcoa_m	4.2.1.17	1670.57	0		R638_num1	0	b2coa_m + h2o_m --> 3hbcoa_m	4.2.1.17	1670.57	0		R638_num1	-3.66272e-18	b2coa_m + h2o_m --> 3hbcoa_m	4.2.1.17	1670.57	-2.1925e-21		R638_num1	0	b2coa_m + h2o_m --> 3hbcoa_m	4.2.1.17	1670.57	0		R638_num1	7.74501e-32	b2coa_m + h2o_m --> 3hbcoa_m	4.2.1.17	1670.57	4.63615e-35		R638_num1	0	b2coa_m + h2o_m --> 3hbcoa_m	4.2.1.17	1670.57	0		R638_num1	0	b2coa_m + h2o_m --> 3hbcoa_m	4.2.1.17	1670.57	0		R638_num1
R639_num1	0	3hbcoa_m + nad_m --> aacoa_m + h_m + nadh_m	1.1.1.35	2870.41	0		R639_num1	0	3hbcoa_m + nad_m --> aacoa_m + h_m + nadh_m	1.1.1.35	2870.41	0		R639_num1	-3.66272e-18	3hbcoa_m + nad_m --> aacoa_m + h_m + nadh_m	1.1.1.35	2870.41	-1.27603e-21		R639_num1	0	3hbcoa_m + nad_m --> aacoa_m + h_m + nadh_m	1.1.1.35	2870.41	0		R639_num1	0	3hbcoa_m + nad_m --> aacoa_m + h_m + nadh_m	1.1.1.35	2870.41	0		R639_num1	0	3hbcoa_m + nad_m --> aacoa_m + h_m + nadh_m	1.1.1.35	2870.41	0		R639_num1	0	3hbcoa_m + nad_m --> aacoa_m + h_m + nadh_m	1.1.1.35	2870.41	0		R639_num1
R640_num1	-1.52505e-16	C4HCOA_x + nad_x --> aacoa_x + h_x + nadh_x	1.1.1.35	4354.54	-3.50221e-20		R640_num1	0	C4HCOA_x + nad_x --> aacoa_x + h_x + nadh_x	1.1.1.35	4354.54	0		R640_num1	0	C4HCOA_x + nad_x --> aacoa_x + h_x + nadh_x	1.1.1.35	4354.54	0		R640_num1	0	C4HCOA_x + nad_x --> aacoa_x + h_x + nadh_x	1.1.1.35	4354.54	0		R640_num1	0	C4HCOA_x + nad_x --> aacoa_x + h_x + nadh_x	1.1.1.35	4354.54	0		R640_num1	0	C4HCOA_x + nad_x --> aacoa_x + h_x + nadh_x	1.1.1.35	4354.54	0		R640_num1	0	C4HCOA_x + nad_x --> aacoa_x + h_x + nadh_x	1.1.1.35	4354.54	0		R640_num1
R641_num1	0	fad_m + h_m + ppcoa_m --> fadh2_m + prpncoa_m		185.801	0		R641_num1	0	fad_m + h_m + ppcoa_m --> fadh2_m + prpncoa_m		185.801	0		R641_num1	0	fad_m + h_m + ppcoa_m --> fadh2_m + prpncoa_m		185.801	0		R641_num1	0	fad_m + h_m + ppcoa_m --> fadh2_m + prpncoa_m		185.801	0		R641_num1	0	fad_m + h_m + ppcoa_m --> fadh2_m + prpncoa_m		185.801	0		R641_num1	0	fad_m + h_m + ppcoa_m --> fadh2_m + prpncoa_m		185.801	0		R641_num1	0	fad_m + h_m + ppcoa_m --> fadh2_m + prpncoa_m		185.801	0		R641_num1
R642_num1	0	2.0 accoa_c --> aacoa_c + coa_c	2.3.1.9,2.3.1.16	76.6558	0		R642_num1	0	2.0 accoa_c --> aacoa_c + coa_c	2.3.1.9,2.3.1.16	76.6558	0		R642_num1	0	2.0 accoa_c --> aacoa_c + coa_c	2.3.1.9,2.3.1.16	76.6558	0		R642_num1	0	2.0 accoa_c --> aacoa_c + coa_c	2.3.1.9,2.3.1.16	76.6558	0		R642_num1	0	2.0 accoa_c --> aacoa_c + coa_c	2.3.1.9,2.3.1.16	76.6558	0		R642_num1	0	2.0 accoa_c --> aacoa_c + coa_c	2.3.1.9,2.3.1.16	76.6558	0		R642_num1	0	2.0 accoa_c --> aacoa_c + coa_c	2.3.1.9,2.3.1.16	76.6558	0		R642_num1
R643_num1	0	aacoa_x + coa_x --> 2.0 accoa_x	2.3.1.9,2.3.1.16	139.032	0		R643_num1	0	aacoa_x + coa_x --> 2.0 accoa_x	2.3.1.9,2.3.1.16	139.032	0		R643_num1	0	aacoa_x + coa_x --> 2.0 accoa_x	2.3.1.9,2.3.1.16	139.032	0		R643_num1	0	aacoa_x + coa_x --> 2.0 accoa_x	2.3.1.9,2.3.1.16	139.032	0		R643_num1	0	aacoa_x + coa_x --> 2.0 accoa_x	2.3.1.9,2.3.1.16	139.032	0		R643_num1	0	aacoa_x + coa_x --> 2.0 accoa_x	2.3.1.9,2.3.1.16	139.032	0		R643_num1	0	aacoa_x + coa_x --> 2.0 accoa_x	2.3.1.9,2.3.1.16	139.032	0		R643_num1
R644_num1	0	C200COA_x + fad_x + h_x --> C20DCOA_x + fadh2_x	1.3.8.7,1.3.8.8	357.662	0		R644_num1	0	C200COA_x + fad_x + h_x --> C20DCOA_x + fadh2_x	1.3.8.7,1.3.8.8	357.662	0		R644_num1	0	C200COA_x + fad_x + h_x --> C20DCOA_x + fadh2_x	1.3.8.7,1.3.8.8	357.662	0		R644_num1	0	C200COA_x + fad_x + h_x --> C20DCOA_x + fadh2_x	1.3.8.7,1.3.8.8	357.662	0		R644_num1	0	C200COA_x + fad_x + h_x --> C20DCOA_x + fadh2_x	1.3.8.7,1.3.8.8	357.662	0		R644_num1	0	C200COA_x + fad_x + h_x --> C20DCOA_x + fadh2_x	1.3.8.7,1.3.8.8	357.662	0		R644_num1	0	C200COA_x + fad_x + h_x --> C20DCOA_x + fadh2_x	1.3.8.7,1.3.8.8	357.662	0		R644_num1
R645_num1	0	fad_x + h_x + stcoa_x --> fadh2_x + od2coa_x	1.3.8.7,1.3.8.8	379.603	0		R645_num1	0	fad_x + h_x + stcoa_x --> fadh2_x + od2coa_x	1.3.8.7,1.3.8.8	379.603	0		R645_num1	0	fad_x + h_x + stcoa_x --> fadh2_x + od2coa_x	1.3.8.7,1.3.8.8	379.603	0		R645_num1	0	fad_x + h_x + stcoa_x --> fadh2_x + od2coa_x	1.3.8.7,1.3.8.8	379.603	0		R645_num1	0	fad_x + h_x + stcoa_x --> fadh2_x + od2coa_x	1.3.8.7,1.3.8.8	379.603	0		R645_num1	0	fad_x + h_x + stcoa_x --> fadh2_x + od2coa_x	1.3.8.7,1.3.8.8	379.603	0		R645_num1	0	fad_x + h_x + stcoa_x --> fadh2_x + od2coa_x	1.3.8.7,1.3.8.8	379.603	0		R645_num1
R646_num1	0	C190COA_x + fad_x + h_x --> C19DCOA_x + fadh2_x	1.3.8.7,1.3.8.8	357.662	0		R646_num1	0	C190COA_x + fad_x + h_x --> C19DCOA_x + fadh2_x	1.3.8.7,1.3.8.8	357.662	0		R646_num1	0	C190COA_x + fad_x + h_x --> C19DCOA_x + fadh2_x	1.3.8.7,1.3.8.8	357.662	0		R646_num1	0	C190COA_x + fad_x + h_x --> C19DCOA_x + fadh2_x	1.3.8.7,1.3.8.8	357.662	0		R646_num1	0	C190COA_x + fad_x + h_x --> C19DCOA_x + fadh2_x	1.3.8.7,1.3.8.8	357.662	0		R646_num1	0	C190COA_x + fad_x + h_x --> C19DCOA_x + fadh2_x	1.3.8.7,1.3.8.8	357.662	0		R646_num1	0	C190COA_x + fad_x + h_x --> C19DCOA_x + fadh2_x	1.3.8.7,1.3.8.8	357.662	0		R646_num1
R647_num1	0	fad_x + h_x + hepdcoa_x --> C17DCOA_x + fadh2_x	1.3.8.7,1.3.8.8	357.662	0		R647_num1	0	fad_x + h_x + hepdcoa_x --> C17DCOA_x + fadh2_x	1.3.8.7,1.3.8.8	357.662	0		R647_num1	0	fad_x + h_x + hepdcoa_x --> C17DCOA_x + fadh2_x	1.3.8.7,1.3.8.8	357.662	0		R647_num1	0	fad_x + h_x + hepdcoa_x --> C17DCOA_x + fadh2_x	1.3.8.7,1.3.8.8	357.662	0		R647_num1	0	fad_x + h_x + hepdcoa_x --> C17DCOA_x + fadh2_x	1.3.8.7,1.3.8.8	357.662	0		R647_num1	0	fad_x + h_x + hepdcoa_x --> C17DCOA_x + fadh2_x	1.3.8.7,1.3.8.8	357.662	0		R647_num1	0	fad_x + h_x + hepdcoa_x --> C17DCOA_x + fadh2_x	1.3.8.7,1.3.8.8	357.662	0		R647_num1
R648_num1	0	fad_x + h_x + pentdcoa_x --> C15DCOA_x + fadh2_x	1.3.8.7,1.3.8.8	357.662	0		R648_num1	0	fad_x + h_x + pentdcoa_x --> C15DCOA_x + fadh2_x	1.3.8.7,1.3.8.8	357.662	0		R648_num1	0	fad_x + h_x + pentdcoa_x --> C15DCOA_x + fadh2_x	1.3.8.7,1.3.8.8	357.662	0		R648_num1	0	fad_x + h_x + pentdcoa_x --> C15DCOA_x + fadh2_x	1.3.8.7,1.3.8.8	357.662	0		R648_num1	0	fad_x + h_x + pentdcoa_x --> C15DCOA_x + fadh2_x	1.3.8.7,1.3.8.8	357.662	0		R648_num1	0	fad_x + h_x + pentdcoa_x --> C15DCOA_x + fadh2_x	1.3.8.7,1.3.8.8	357.662	0		R648_num1	0	fad_x + h_x + pentdcoa_x --> C15DCOA_x + fadh2_x	1.3.8.7,1.3.8.8	357.662	0		R648_num1
R649_num1	0	fad_x + h_x + trdcalcoa_x --> C13DCOA_x + fadh2_x	1.3.8.7,1.3.8.8	357.662	0		R649_num1	0	fad_x + h_x + trdcalcoa_x --> C13DCOA_x + fadh2_x	1.3.8.7,1.3.8.8	357.662	0		R649_num1	0	fad_x + h_x + trdcalcoa_x --> C13DCOA_x + fadh2_x	1.3.8.7,1.3.8.8	357.662	0		R649_num1	0	fad_x + h_x + trdcalcoa_x --> C13DCOA_x + fadh2_x	1.3.8.7,1.3.8.8	357.662	0		R649_num1	0	fad_x + h_x + trdcalcoa_x --> C13DCOA_x + fadh2_x	1.3.8.7,1.3.8.8	357.662	0		R649_num1	0	fad_x + h_x + trdcalcoa_x --> C13DCOA_x + fadh2_x	1.3.8.7,1.3.8.8	357.662	0		R649_num1	0	fad_x + h_x + trdcalcoa_x --> C13DCOA_x + fadh2_x	1.3.8.7,1.3.8.8	357.662	0		R649_num1
R650_num1	0	C110COA_x + fad_x + h_x --> C11DCOA_x + fadh2_x	1.3.8.7,1.3.8.8	357.662	0		R650_num1	0	C110COA_x + fad_x + h_x --> C11DCOA_x + fadh2_x	1.3.8.7,1.3.8.8	357.662	0		R650_num1	0	C110COA_x + fad_x + h_x --> C11DCOA_x + fadh2_x	1.3.8.7,1.3.8.8	357.662	0		R650_num1	0	C110COA_x + fad_x + h_x --> C11DCOA_x + fadh2_x	1.3.8.7,1.3.8.8	357.662	0		R650_num1	0	C110COA_x + fad_x + h_x --> C11DCOA_x + fadh2_x	1.3.8.7,1.3.8.8	357.662	0		R650_num1	0	C110COA_x + fad_x + h_x --> C11DCOA_x + fadh2_x	1.3.8.7,1.3.8.8	357.662	0		R650_num1	0	C110COA_x + fad_x + h_x --> C11DCOA_x + fadh2_x	1.3.8.7,1.3.8.8	357.662	0		R650_num1
R651_num1	0	fad_x + h_x + nndccoa_x --> C9DCOA_x + fadh2_x	1.3.8.7,1.3.8.8	357.662	0		R651_num1	0	fad_x + h_x + nndccoa_x --> C9DCOA_x + fadh2_x	1.3.8.7,1.3.8.8	357.662	0		R651_num1	0	fad_x + h_x + nndccoa_x --> C9DCOA_x + fadh2_x	1.3.8.7,1.3.8.8	357.662	0		R651_num1	0	fad_x + h_x + nndccoa_x --> C9DCOA_x + fadh2_x	1.3.8.7,1.3.8.8	357.662	0		R651_num1	0	fad_x + h_x + nndccoa_x --> C9DCOA_x + fadh2_x	1.3.8.7,1.3.8.8	357.662	0		R651_num1	0	fad_x + h_x + nndccoa_x --> C9DCOA_x + fadh2_x	1.3.8.7,1.3.8.8	357.662	0		R651_num1	0	fad_x + h_x + nndccoa_x --> C9DCOA_x + fadh2_x	1.3.8.7,1.3.8.8	357.662	0		R651_num1
R652_num1	0	C70COA_x + fad_x + h_x --> C7DCOA_x + fadh2_x	1.3.8.7,1.3.8.8	357.662	0		R652_num1	0	C70COA_x + fad_x + h_x --> C7DCOA_x + fadh2_x	1.3.8.7,1.3.8.8	357.662	0		R652_num1	0	C70COA_x + fad_x + h_x --> C7DCOA_x + fadh2_x	1.3.8.7,1.3.8.8	357.662	0		R652_num1	0	C70COA_x + fad_x + h_x --> C7DCOA_x + fadh2_x	1.3.8.7,1.3.8.8	357.662	0		R652_num1	0	C70COA_x + fad_x + h_x --> C7DCOA_x + fadh2_x	1.3.8.7,1.3.8.8	357.662	0		R652_num1	0	C70COA_x + fad_x + h_x --> C7DCOA_x + fadh2_x	1.3.8.7,1.3.8.8	357.662	0		R652_num1	0	C70COA_x + fad_x + h_x --> C7DCOA_x + fadh2_x	1.3.8.7,1.3.8.8	357.662	0		R652_num1
R653_num1	0	fad_x + 5.0 h_x + ptcoa_x --> fadh2_x + pt2coa_x	1.3.8.7,1.3.8.8	379.603	0		R653_num1	0	fad_x + 5.0 h_x + ptcoa_x --> fadh2_x + pt2coa_x	1.3.8.7,1.3.8.8	379.603	0		R653_num1	0	fad_x + 5.0 h_x + ptcoa_x --> fadh2_x + pt2coa_x	1.3.8.7,1.3.8.8	379.603	0		R653_num1	0	fad_x + 5.0 h_x + ptcoa_x --> fadh2_x + pt2coa_x	1.3.8.7,1.3.8.8	379.603	0		R653_num1	0	fad_x + 5.0 h_x + ptcoa_x --> fadh2_x + pt2coa_x	1.3.8.7,1.3.8.8	379.603	0		R653_num1	0	fad_x + 5.0 h_x + ptcoa_x --> fadh2_x + pt2coa_x	1.3.8.7,1.3.8.8	379.603	0		R653_num1	0	fad_x + 5.0 h_x + ptcoa_x --> fadh2_x + pt2coa_x	1.3.8.7,1.3.8.8	379.603	0		R653_num1
R654_num1	0	C20DCOA_x + h2o_x --> 3heicoscoa_x	4.2.1.17,4.2.1.74	2941.07	0		R654_num1	0	C20DCOA_x + h2o_x --> 3heicoscoa_x	4.2.1.17,4.2.1.74	2941.07	0		R654_num1	2.9156e-20	C20DCOA_x + h2o_x --> 3heicoscoa_x	4.2.1.17,4.2.1.74	2941.07	9.9134e-24		R654_num1	0	C20DCOA_x + h2o_x --> 3heicoscoa_x	4.2.1.17,4.2.1.74	2941.07	0		R654_num1	0	C20DCOA_x + h2o_x --> 3heicoscoa_x	4.2.1.17,4.2.1.74	2941.07	0		R654_num1	0	C20DCOA_x + h2o_x --> 3heicoscoa_x	4.2.1.17,4.2.1.74	2941.07	0		R654_num1	0	C20DCOA_x + h2o_x --> 3heicoscoa_x	4.2.1.17,4.2.1.74	2941.07	0		R654_num1
R655_num1	0	3heicoscoa_x + nad_x --> C20OCOA_x + h_x + nadh_x	1.1.1.35,1.1.1.211	4354.54	0		R655_num1	0	3heicoscoa_x + nad_x --> C20OCOA_x + h_x + nadh_x	1.1.1.35,1.1.1.211	4354.54	0		R655_num1	2.9156e-20	3heicoscoa_x + nad_x --> C20OCOA_x + h_x + nadh_x	1.1.1.35,1.1.1.211	4354.54	6.69554e-24		R655_num1	0	3heicoscoa_x + nad_x --> C20OCOA_x + h_x + nadh_x	1.1.1.35,1.1.1.211	4354.54	0		R655_num1	0	3heicoscoa_x + nad_x --> C20OCOA_x + h_x + nadh_x	1.1.1.35,1.1.1.211	4354.54	0		R655_num1	0	3heicoscoa_x + nad_x --> C20OCOA_x + h_x + nadh_x	1.1.1.35,1.1.1.211	4354.54	0		R655_num1	0	3heicoscoa_x + nad_x --> C20OCOA_x + h_x + nadh_x	1.1.1.35,1.1.1.211	4354.54	0		R655_num1
R656_num1	0	C20OCOA_x + coa_x --> accoa_x + stcoa_x	2.3.1.16	911.02	0		R656_num1	0	C20OCOA_x + coa_x --> accoa_x + stcoa_x	2.3.1.16	911.02	0		R656_num1	2.9156e-20	C20OCOA_x + coa_x --> accoa_x + stcoa_x	2.3.1.16	911.02	3.20037e-23		R656_num1	0	C20OCOA_x + coa_x --> accoa_x + stcoa_x	2.3.1.16	911.02	0		R656_num1	0	C20OCOA_x + coa_x --> accoa_x + stcoa_x	2.3.1.16	911.02	0		R656_num1	0	C20OCOA_x + coa_x --> accoa_x + stcoa_x	2.3.1.16	911.02	0		R656_num1	0	C20OCOA_x + coa_x --> accoa_x + stcoa_x	2.3.1.16	911.02	0		R656_num1
R657_num1	0	CE2248_x + nad_x --> 3ohodcoa_x + h_x + nadh_x	1.1.1.35,1.1.1.211	2786.22	0		R657_num1	0	CE2248_x + nad_x --> 3ohodcoa_x + h_x + nadh_x	1.1.1.35,1.1.1.211	2786.22	0		R657_num1	0	CE2248_x + nad_x --> 3ohodcoa_x + h_x + nadh_x	1.1.1.35,1.1.1.211	2786.22	0		R657_num1	0	CE2248_x + nad_x --> 3ohodcoa_x + h_x + nadh_x	1.1.1.35,1.1.1.211	2786.22	0		R657_num1	0	CE2248_x + nad_x --> 3ohodcoa_x + h_x + nadh_x	1.1.1.35,1.1.1.211	2786.22	0		R657_num1	0	CE2248_x + nad_x --> 3ohodcoa_x + h_x + nadh_x	1.1.1.35,1.1.1.211	2786.22	0		R657_num1	0	CE2248_x + nad_x --> 3ohodcoa_x + h_x + nadh_x	1.1.1.35,1.1.1.211	2786.22	0		R657_num1
R658_num1	0	3ohodcoa_x + coa_x --> accoa_x + pmtcoa_x	2.3.1.16	676.462	0		R658_num1	0	3ohodcoa_x + coa_x --> accoa_x + pmtcoa_x	2.3.1.16	676.462	0		R658_num1	0	3ohodcoa_x + coa_x --> accoa_x + pmtcoa_x	2.3.1.16	676.462	0		R658_num1	0	3ohodcoa_x + coa_x --> accoa_x + pmtcoa_x	2.3.1.16	676.462	0		R658_num1	0	3ohodcoa_x + coa_x --> accoa_x + pmtcoa_x	2.3.1.16	676.462	0		R658_num1	0	3ohodcoa_x + coa_x --> accoa_x + pmtcoa_x	2.3.1.16	676.462	0		R658_num1	0	3ohodcoa_x + coa_x --> accoa_x + pmtcoa_x	2.3.1.16	676.462	0		R658_num1
R659_num1	0	C19DCOA_x + h2o_x --> C19HCOA_x	4.2.1.17,4.2.1.74	2941.07	0		R659_num1	0	C19DCOA_x + h2o_x --> C19HCOA_x	4.2.1.17,4.2.1.74	2941.07	0		R659_num1	-4.06019e-20	C19DCOA_x + h2o_x --> C19HCOA_x	4.2.1.17,4.2.1.74	2941.07	-1.38051e-23		R659_num1	0	C19DCOA_x + h2o_x --> C19HCOA_x	4.2.1.17,4.2.1.74	2941.07	0		R659_num1	2.47738e-31	C19DCOA_x + h2o_x --> C19HCOA_x	4.2.1.17,4.2.1.74	2941.07	8.42337e-35		R659_num1	0	C19DCOA_x + h2o_x --> C19HCOA_x	4.2.1.17,4.2.1.74	2941.07	0		R659_num1	0	C19DCOA_x + h2o_x --> C19HCOA_x	4.2.1.17,4.2.1.74	2941.07	0		R659_num1
R660_num1	0	C19HCOA_x + nad_x --> C19OCOA_x + h_x + nadh_x	1.1.1.35,1.1.1.211	4354.54	0		R660_num1	0	C19HCOA_x + nad_x --> C19OCOA_x + h_x + nadh_x	1.1.1.35,1.1.1.211	4354.54	0		R660_num1	-4.06019e-20	C19HCOA_x + nad_x --> C19OCOA_x + h_x + nadh_x	1.1.1.35,1.1.1.211	4354.54	-9.32404e-24		R660_num1	0	C19HCOA_x + nad_x --> C19OCOA_x + h_x + nadh_x	1.1.1.35,1.1.1.211	4354.54	0		R660_num1	2.47738e-31	C19HCOA_x + nad_x --> C19OCOA_x + h_x + nadh_x	1.1.1.35,1.1.1.211	4354.54	5.68918e-35		R660_num1	0	C19HCOA_x + nad_x --> C19OCOA_x + h_x + nadh_x	1.1.1.35,1.1.1.211	4354.54	0		R660_num1	0	C19HCOA_x + nad_x --> C19OCOA_x + h_x + nadh_x	1.1.1.35,1.1.1.211	4354.54	0		R660_num1
R661_num1	0	C19OCOA_x + coa_x --> accoa_x + hepdcoa_x	2.3.1.16	911.02	0		R661_num1	0	C19OCOA_x + coa_x --> accoa_x + hepdcoa_x	2.3.1.16	911.02	0		R661_num1	-4.06019e-20	C19OCOA_x + coa_x --> accoa_x + hepdcoa_x	2.3.1.16	911.02	-4.45676e-23		R661_num1	0	C19OCOA_x + coa_x --> accoa_x + hepdcoa_x	2.3.1.16	911.02	0		R661_num1	2.47738e-31	C19OCOA_x + coa_x --> accoa_x + hepdcoa_x	2.3.1.16	911.02	2.71934e-34		R661_num1	0	C19OCOA_x + coa_x --> accoa_x + hepdcoa_x	2.3.1.16	911.02	0		R661_num1	0	C19OCOA_x + coa_x --> accoa_x + hepdcoa_x	2.3.1.16	911.02	0		R661_num1
R662_num1	-8.8726e-16	C17DCOA_x + h2o_x --> C17HCOA_x	4.2.1.17,4.2.1.74	2941.07	-3.01679e-19		R662_num1	0	C17DCOA_x + h2o_x --> C17HCOA_x	4.2.1.17,4.2.1.74	2941.07	0		R662_num1	0	C17DCOA_x + h2o_x --> C17HCOA_x	4.2.1.17,4.2.1.74	2941.07	0		R662_num1	0	C17DCOA_x + h2o_x --> C17HCOA_x	4.2.1.17,4.2.1.74	2941.07	0		R662_num1	2.47738e-31	C17DCOA_x + h2o_x --> C17HCOA_x	4.2.1.17,4.2.1.74	2941.07	8.42337e-35		R662_num1	0	C17DCOA_x + h2o_x --> C17HCOA_x	4.2.1.17,4.2.1.74	2941.07	0		R662_num1	0	C17DCOA_x + h2o_x --> C17HCOA_x	4.2.1.17,4.2.1.74	2941.07	0		R662_num1
R663_num1	-8.8726e-16	C17HCOA_x + nad_x --> C17OCOA_x + h_x + nadh_x	1.1.1.35,1.1.1.211	4354.54	-2.03755e-19		R663_num1	0	C17HCOA_x + nad_x --> C17OCOA_x + h_x + nadh_x	1.1.1.35,1.1.1.211	4354.54	0		R663_num1	0	C17HCOA_x + nad_x --> C17OCOA_x + h_x + nadh_x	1.1.1.35,1.1.1.211	4354.54	0		R663_num1	0	C17HCOA_x + nad_x --> C17OCOA_x + h_x + nadh_x	1.1.1.35,1.1.1.211	4354.54	0		R663_num1	2.47738e-31	C17HCOA_x + nad_x --> C17OCOA_x + h_x + nadh_x	1.1.1.35,1.1.1.211	4354.54	5.68918e-35		R663_num1	0	C17HCOA_x + nad_x --> C17OCOA_x + h_x + nadh_x	1.1.1.35,1.1.1.211	4354.54	0		R663_num1	0	C17HCOA_x + nad_x --> C17OCOA_x + h_x + nadh_x	1.1.1.35,1.1.1.211	4354.54	0		R663_num1
R664_num1	-8.8726e-16	C17OCOA_x + coa_x --> accoa_x + pentdcoa_x	2.3.1.16	911.02	-9.7392e-19		R664_num1	0	C17OCOA_x + coa_x --> accoa_x + pentdcoa_x	2.3.1.16	911.02	0		R664_num1	0	C17OCOA_x + coa_x --> accoa_x + pentdcoa_x	2.3.1.16	911.02	0		R664_num1	0	C17OCOA_x + coa_x --> accoa_x + pentdcoa_x	2.3.1.16	911.02	0		R664_num1	2.47738e-31	C17OCOA_x + coa_x --> accoa_x + pentdcoa_x	2.3.1.16	911.02	2.71934e-34		R664_num1	0	C17OCOA_x + coa_x --> accoa_x + pentdcoa_x	2.3.1.16	911.02	0		R664_num1	0	C17OCOA_x + coa_x --> accoa_x + pentdcoa_x	2.3.1.16	911.02	0		R664_num1
R665_num1	0	C15DCOA_x + h2o_x --> C15HCOA_x	4.2.1.17,4.2.1.74	2941.07	0		R665_num1	0	C15DCOA_x + h2o_x --> C15HCOA_x	4.2.1.17,4.2.1.74	2941.07	0		R665_num1	0	C15DCOA_x + h2o_x --> C15HCOA_x	4.2.1.17,4.2.1.74	2941.07	0		R665_num1	0	C15DCOA_x + h2o_x --> C15HCOA_x	4.2.1.17,4.2.1.74	2941.07	0		R665_num1	-5.71246e-32	C15DCOA_x + h2o_x --> C15HCOA_x	4.2.1.17,4.2.1.74	2941.07	-1.94231e-35		R665_num1	0	C15DCOA_x + h2o_x --> C15HCOA_x	4.2.1.17,4.2.1.74	2941.07	0		R665_num1	0	C15DCOA_x + h2o_x --> C15HCOA_x	4.2.1.17,4.2.1.74	2941.07	0		R665_num1
R666_num1	0	C15HCOA_x + nad_x --> C15OCOA_x + h_x + nadh_x	1.1.1.35,1.1.1.211	4354.54	0		R666_num1	0	C15HCOA_x + nad_x --> C15OCOA_x + h_x + nadh_x	1.1.1.35,1.1.1.211	4354.54	0		R666_num1	0	C15HCOA_x + nad_x --> C15OCOA_x + h_x + nadh_x	1.1.1.35,1.1.1.211	4354.54	0		R666_num1	0	C15HCOA_x + nad_x --> C15OCOA_x + h_x + nadh_x	1.1.1.35,1.1.1.211	4354.54	0		R666_num1	-5.71246e-32	C15HCOA_x + nad_x --> C15OCOA_x + h_x + nadh_x	1.1.1.35,1.1.1.211	4354.54	-1.31184e-35		R666_num1	0	C15HCOA_x + nad_x --> C15OCOA_x + h_x + nadh_x	1.1.1.35,1.1.1.211	4354.54	0		R666_num1	0	C15HCOA_x + nad_x --> C15OCOA_x + h_x + nadh_x	1.1.1.35,1.1.1.211	4354.54	0		R666_num1
R667_num1	0	C15OCOA_x + coa_x --> accoa_x + trdcalcoa_x	2.3.1.16	911.02	0		R667_num1	0	C15OCOA_x + coa_x --> accoa_x + trdcalcoa_x	2.3.1.16	911.02	0		R667_num1	0	C15OCOA_x + coa_x --> accoa_x + trdcalcoa_x	2.3.1.16	911.02	0		R667_num1	0	C15OCOA_x + coa_x --> accoa_x + trdcalcoa_x	2.3.1.16	911.02	0		R667_num1	-5.71246e-32	C15OCOA_x + coa_x --> accoa_x + trdcalcoa_x	2.3.1.16	911.02	-6.27041e-35		R667_num1	0	C15OCOA_x + coa_x --> accoa_x + trdcalcoa_x	2.3.1.16	911.02	0		R667_num1	0	C15OCOA_x + coa_x --> accoa_x + trdcalcoa_x	2.3.1.16	911.02	0		R667_num1
R668_num1	0	C13DCOA_x + h2o_x --> C13HCOA_x	4.2.1.17,4.2.1.74	2941.07	0		R668_num1	0	C13DCOA_x + h2o_x --> C13HCOA_x	4.2.1.17,4.2.1.74	2941.07	0		R668_num1	0	C13DCOA_x + h2o_x --> C13HCOA_x	4.2.1.17,4.2.1.74	2941.07	0		R668_num1	0	C13DCOA_x + h2o_x --> C13HCOA_x	4.2.1.17,4.2.1.74	2941.07	0		R668_num1	-5.71246e-32	C13DCOA_x + h2o_x --> C13HCOA_x	4.2.1.17,4.2.1.74	2941.07	-1.94231e-35		R668_num1	0	C13DCOA_x + h2o_x --> C13HCOA_x	4.2.1.17,4.2.1.74	2941.07	0		R668_num1	0	C13DCOA_x + h2o_x --> C13HCOA_x	4.2.1.17,4.2.1.74	2941.07	0		R668_num1
R669_num1	0	C13HCOA_x + nad_x --> C13OCOA_x + h_x + nadh_x	1.1.1.35,1.1.1.211	4354.54	0		R669_num1	0	C13HCOA_x + nad_x --> C13OCOA_x + h_x + nadh_x	1.1.1.35,1.1.1.211	4354.54	0		R669_num1	0	C13HCOA_x + nad_x --> C13OCOA_x + h_x + nadh_x	1.1.1.35,1.1.1.211	4354.54	0		R669_num1	0	C13HCOA_x + nad_x --> C13OCOA_x + h_x + nadh_x	1.1.1.35,1.1.1.211	4354.54	0		R669_num1	-5.71246e-32	C13HCOA_x + nad_x --> C13OCOA_x + h_x + nadh_x	1.1.1.35,1.1.1.211	4354.54	-1.31184e-35		R669_num1	0	C13HCOA_x + nad_x --> C13OCOA_x + h_x + nadh_x	1.1.1.35,1.1.1.211	4354.54	0		R669_num1	0	C13HCOA_x + nad_x --> C13OCOA_x + h_x + nadh_x	1.1.1.35,1.1.1.211	4354.54	0		R669_num1
R670_num1	0	C13OCOA_x + coa_x --> C110COA_x + accoa_x	2.3.1.16	911.02	0		R670_num1	0	C13OCOA_x + coa_x --> C110COA_x + accoa_x	2.3.1.16	911.02	0		R670_num1	0	C13OCOA_x + coa_x --> C110COA_x + accoa_x	2.3.1.16	911.02	0		R670_num1	0	C13OCOA_x + coa_x --> C110COA_x + accoa_x	2.3.1.16	911.02	0		R670_num1	-5.71246e-32	C13OCOA_x + coa_x --> C110COA_x + accoa_x	2.3.1.16	911.02	-6.27041e-35		R670_num1	0	C13OCOA_x + coa_x --> C110COA_x + accoa_x	2.3.1.16	911.02	0		R670_num1	0	C13OCOA_x + coa_x --> C110COA_x + accoa_x	2.3.1.16	911.02	0		R670_num1
R671_num1	0	C11DCOA_x + h2o_x --> C11HCOA_x	4.2.1.17,4.2.1.74	2941.07	0		R671_num1	0	C11DCOA_x + h2o_x --> C11HCOA_x	4.2.1.17,4.2.1.74	2941.07	0		R671_num1	0	C11DCOA_x + h2o_x --> C11HCOA_x	4.2.1.17,4.2.1.74	2941.07	0		R671_num1	0	C11DCOA_x + h2o_x --> C11HCOA_x	4.2.1.17,4.2.1.74	2941.07	0		R671_num1	-5.71246e-32	C11DCOA_x + h2o_x --> C11HCOA_x	4.2.1.17,4.2.1.74	2941.07	-1.94231e-35		R671_num1	0	C11DCOA_x + h2o_x --> C11HCOA_x	4.2.1.17,4.2.1.74	2941.07	0		R671_num1	0	C11DCOA_x + h2o_x --> C11HCOA_x	4.2.1.17,4.2.1.74	2941.07	0		R671_num1
R672_num1	0	C11HCOA_x + nad_x --> C11OCOA_x + h_x + nadh_x	1.1.1.35,1.1.1.211	4354.54	0		R672_num1	0	C11HCOA_x + nad_x --> C11OCOA_x + h_x + nadh_x	1.1.1.35,1.1.1.211	4354.54	0		R672_num1	0	C11HCOA_x + nad_x --> C11OCOA_x + h_x + nadh_x	1.1.1.35,1.1.1.211	4354.54	0		R672_num1	0	C11HCOA_x + nad_x --> C11OCOA_x + h_x + nadh_x	1.1.1.35,1.1.1.211	4354.54	0		R672_num1	-5.71246e-32	C11HCOA_x + nad_x --> C11OCOA_x + h_x + nadh_x	1.1.1.35,1.1.1.211	4354.54	-1.31184e-35		R672_num1	0	C11HCOA_x + nad_x --> C11OCOA_x + h_x + nadh_x	1.1.1.35,1.1.1.211	4354.54	0		R672_num1	0	C11HCOA_x + nad_x --> C11OCOA_x + h_x + nadh_x	1.1.1.35,1.1.1.211	4354.54	0		R672_num1
R673_num1	0	C11OCOA_x + coa_x --> accoa_x + nndccoa_x	2.3.1.16	911.02	0		R673_num1	0	C11OCOA_x + coa_x --> accoa_x + nndccoa_x	2.3.1.16	911.02	0		R673_num1	0	C11OCOA_x + coa_x --> accoa_x + nndccoa_x	2.3.1.16	911.02	0		R673_num1	0	C11OCOA_x + coa_x --> accoa_x + nndccoa_x	2.3.1.16	911.02	0		R673_num1	-5.71246e-32	C11OCOA_x + coa_x --> accoa_x + nndccoa_x	2.3.1.16	911.02	-6.27041e-35		R673_num1	0	C11OCOA_x + coa_x --> accoa_x + nndccoa_x	2.3.1.16	911.02	0		R673_num1	0	C11OCOA_x + coa_x --> accoa_x + nndccoa_x	2.3.1.16	911.02	0		R673_num1
R674_num1	5.97678e-16	C9DCOA_x + h2o_x --> C9HCOA_x	4.2.1.17,4.2.1.74	2941.07	2.03218e-19		R674_num1	0	C9DCOA_x + h2o_x --> C9HCOA_x	4.2.1.17,4.2.1.74	2941.07	0		R674_num1	0	C9DCOA_x + h2o_x --> C9HCOA_x	4.2.1.17,4.2.1.74	2941.07	0		R674_num1	0	C9DCOA_x + h2o_x --> C9HCOA_x	4.2.1.17,4.2.1.74	2941.07	0		R674_num1	-5.71246e-32	C9DCOA_x + h2o_x --> C9HCOA_x	4.2.1.17,4.2.1.74	2941.07	-1.94231e-35		R674_num1	0	C9DCOA_x + h2o_x --> C9HCOA_x	4.2.1.17,4.2.1.74	2941.07	0		R674_num1	0	C9DCOA_x + h2o_x --> C9HCOA_x	4.2.1.17,4.2.1.74	2941.07	0		R674_num1
R675_num1	5.97678e-16	C9HCOA_x + nad_x --> C9OCOA_x + h_x + nadh_x	1.1.1.35,1.1.1.211	4354.54	1.37254e-19		R675_num1	0	C9HCOA_x + nad_x --> C9OCOA_x + h_x + nadh_x	1.1.1.35,1.1.1.211	4354.54	0		R675_num1	0	C9HCOA_x + nad_x --> C9OCOA_x + h_x + nadh_x	1.1.1.35,1.1.1.211	4354.54	0		R675_num1	0	C9HCOA_x + nad_x --> C9OCOA_x + h_x + nadh_x	1.1.1.35,1.1.1.211	4354.54	0		R675_num1	-5.71246e-32	C9HCOA_x + nad_x --> C9OCOA_x + h_x + nadh_x	1.1.1.35,1.1.1.211	4354.54	-1.31184e-35		R675_num1	0	C9HCOA_x + nad_x --> C9OCOA_x + h_x + nadh_x	1.1.1.35,1.1.1.211	4354.54	0		R675_num1	0	C9HCOA_x + nad_x --> C9OCOA_x + h_x + nadh_x	1.1.1.35,1.1.1.211	4354.54	0		R675_num1
R676_num1	5.97678e-16	C9OCOA_x + coa_x --> C70COA_x + accoa_x	2.3.1.16	911.02	6.56054e-19		R676_num1	0	C9OCOA_x + coa_x --> C70COA_x + accoa_x	2.3.1.16	911.02	0		R676_num1	0	C9OCOA_x + coa_x --> C70COA_x + accoa_x	2.3.1.16	911.02	0		R676_num1	0	C9OCOA_x + coa_x --> C70COA_x + accoa_x	2.3.1.16	911.02	0		R676_num1	-5.71246e-32	C9OCOA_x + coa_x --> C70COA_x + accoa_x	2.3.1.16	911.02	-6.27041e-35		R676_num1	0	C9OCOA_x + coa_x --> C70COA_x + accoa_x	2.3.1.16	911.02	0		R676_num1	0	C9OCOA_x + coa_x --> C70COA_x + accoa_x	2.3.1.16	911.02	0		R676_num1
R677_num1	1.4942e-16	C7DCOA_x + h2o_x --> C7HCOA_x	4.2.1.17,4.2.1.74	2941.07	5.08044e-20		R677_num1	0	C7DCOA_x + h2o_x --> C7HCOA_x	4.2.1.17,4.2.1.74	2941.07	0		R677_num1	0	C7DCOA_x + h2o_x --> C7HCOA_x	4.2.1.17,4.2.1.74	2941.07	0		R677_num1	0	C7DCOA_x + h2o_x --> C7HCOA_x	4.2.1.17,4.2.1.74	2941.07	0		R677_num1	-3.36415e-32	C7DCOA_x + h2o_x --> C7HCOA_x	4.2.1.17,4.2.1.74	2941.07	-1.14385e-35		R677_num1	0	C7DCOA_x + h2o_x --> C7HCOA_x	4.2.1.17,4.2.1.74	2941.07	0		R677_num1	0	C7DCOA_x + h2o_x --> C7HCOA_x	4.2.1.17,4.2.1.74	2941.07	0		R677_num1
[truncated: 6,021 more rows]
[truncated: 29 more columns]

## Sheet: D-Cellobiose
3pg_c								accoa_m						akg_m							e4p_c							f6p_c							g3p_c							g6p_c							oaa_m
	fluxes	equ	ec-code	kcat_MW	E			fluxes	equ	ec-code	kcat_MW	E			fluxes	equ	ec-code	kcat_MW	E			fluxes	equ	ec-code	kcat_MW	E			fluxes	equ	ec-code	kcat_MW	E			fluxes	equ	ec-code	kcat_MW	E			fluxes	equ	ec-code	kcat_MW	E
[truncated: 6,691 more rows]
[truncated: 29 more columns]

## Sheet: D-Galactose
3pg_c								accoa_m						akg_m							e4p_c							f6p_c							g3p_c							g6p_c							oaa_m
[truncated: 6,692 more rows]
[truncated: 29 more columns]

## Sheet: D-Xylose
3pg_c								accoa_m						akg_m							e4p_c							f6p_c							g3p_c							g6p_c							oaa_m
[truncated: 6,692 more rows]
[truncated: 29 more columns]

[truncated: 1 more sheets: L-Arabinose]
